# Supplementary material
Source: PubMed Central journal article supplement (PMC2770713)

**A**

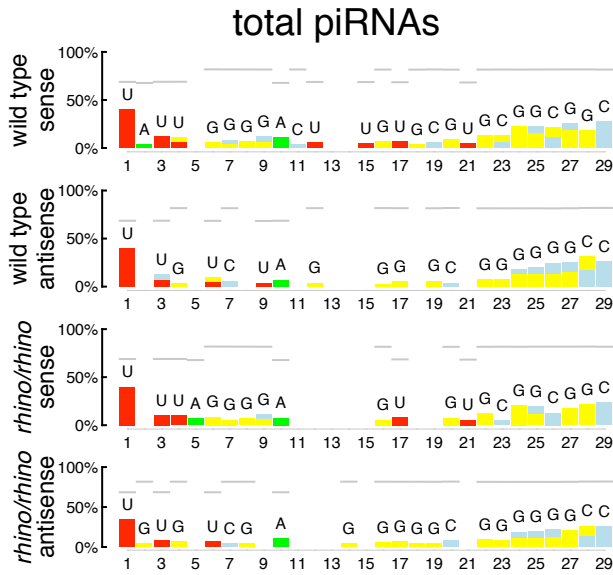

**B**

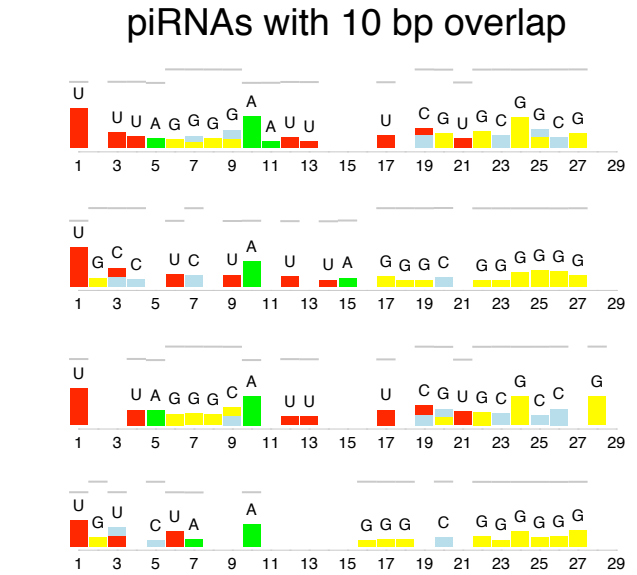

**C**

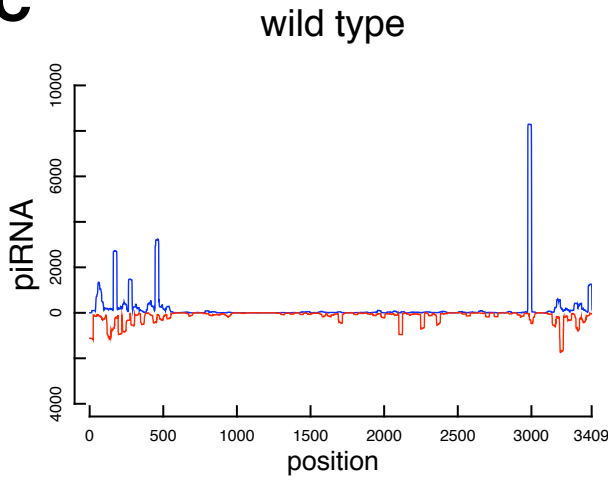

**E**

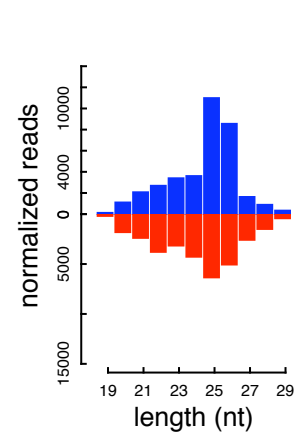

**G**

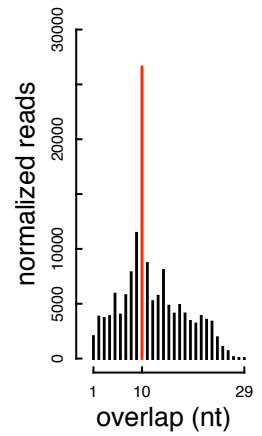

**D**

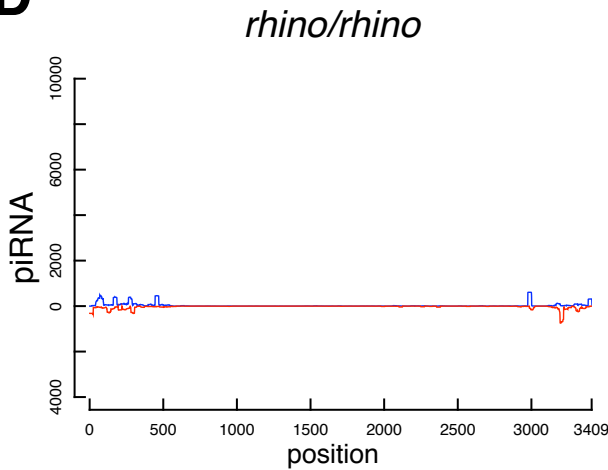

**F**

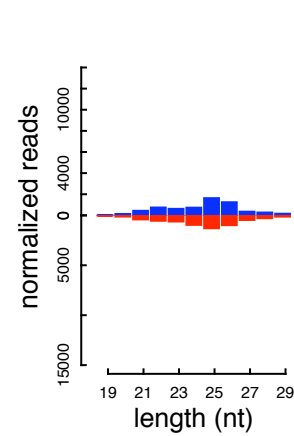

**H**

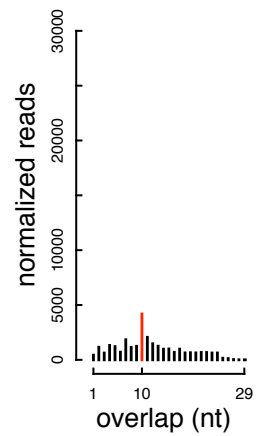

# 1731

**A**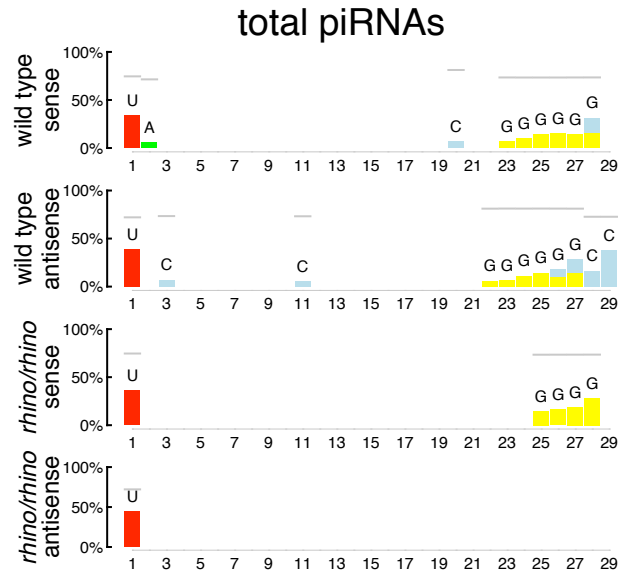**B**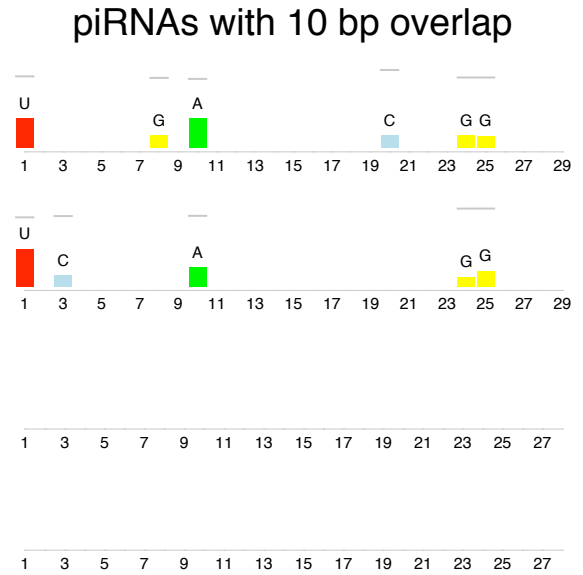**C**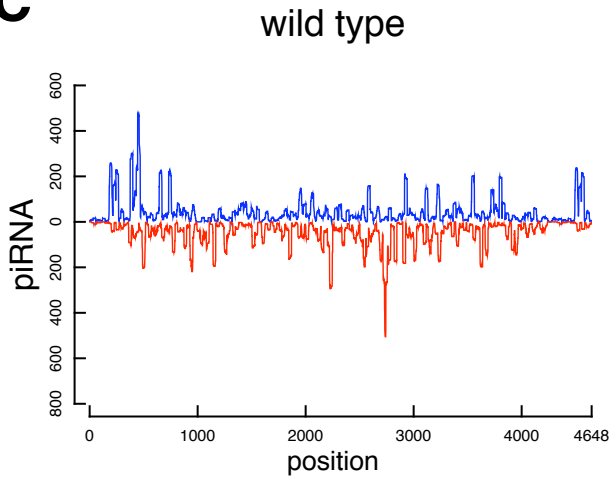**E**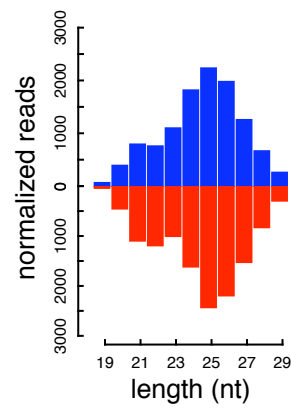**G**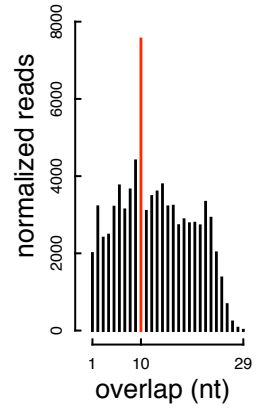**D**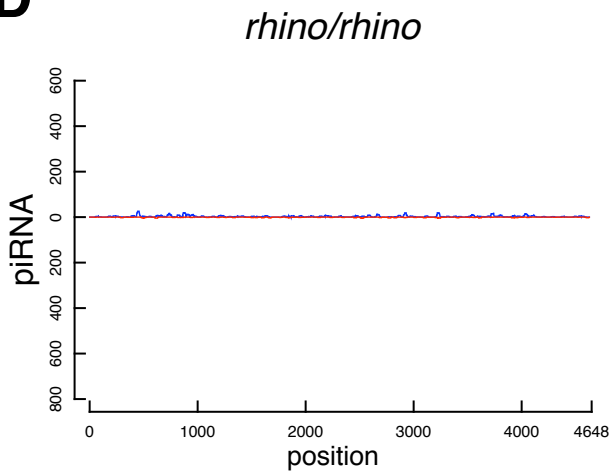**F**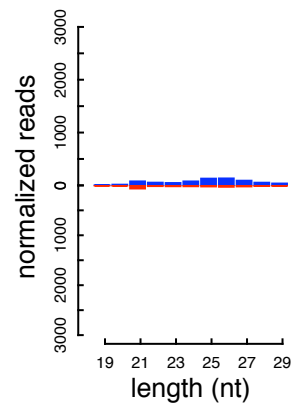**H**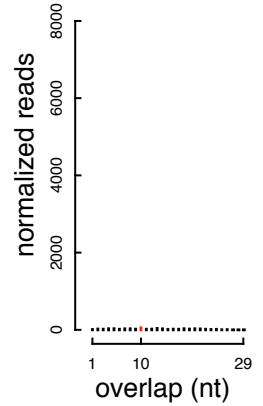

# 17.6

**A**

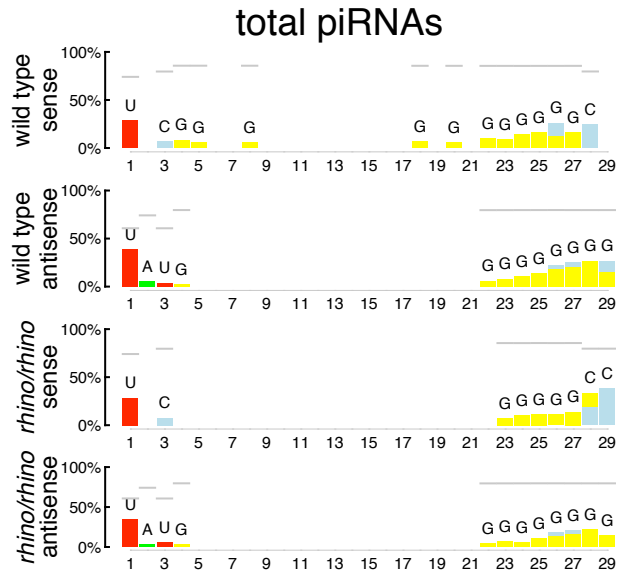

**B**

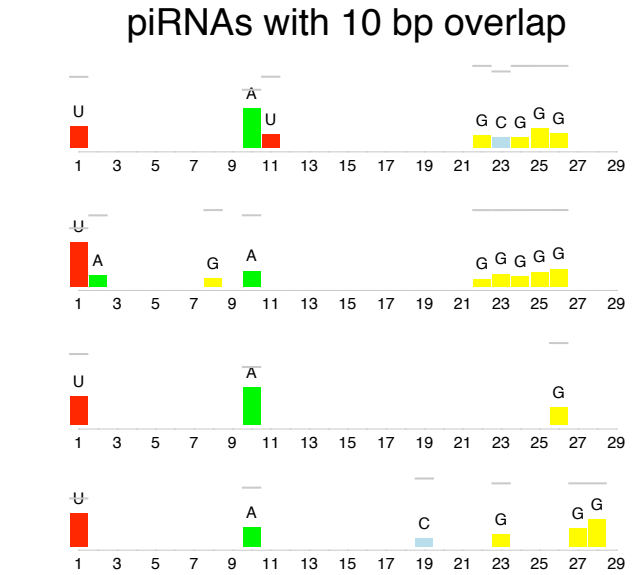

**C**

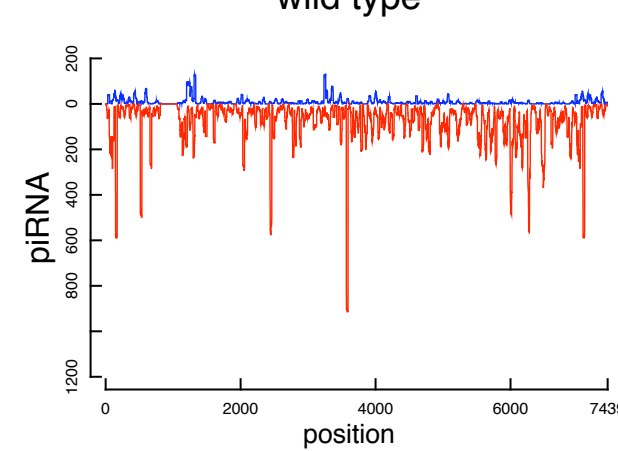

**E**

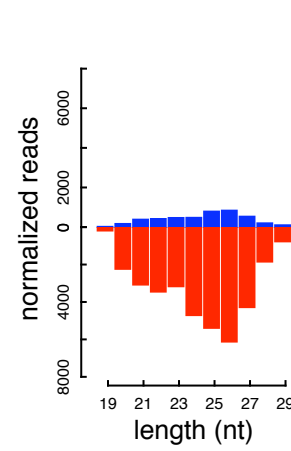

**G**

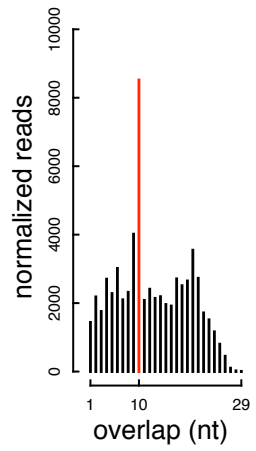

**D**

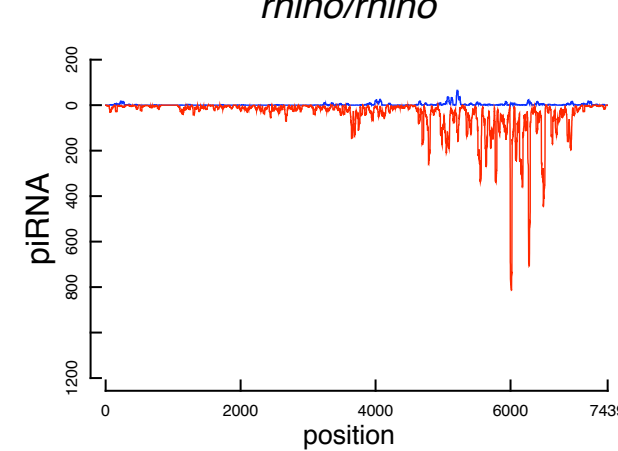

**F**

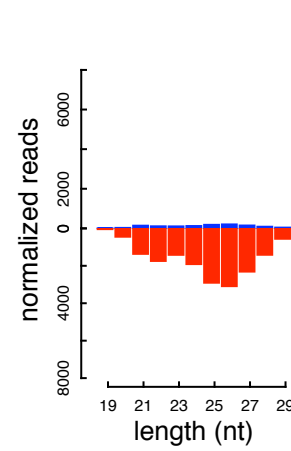

**H**

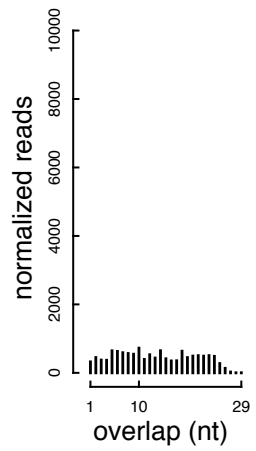

**A**

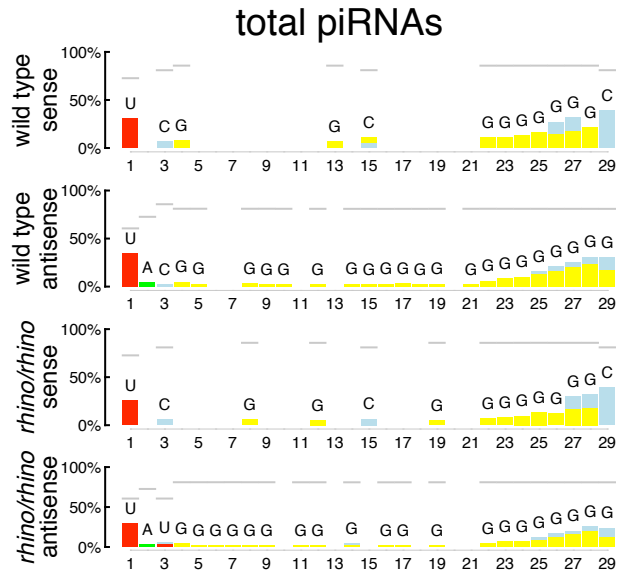

**B**

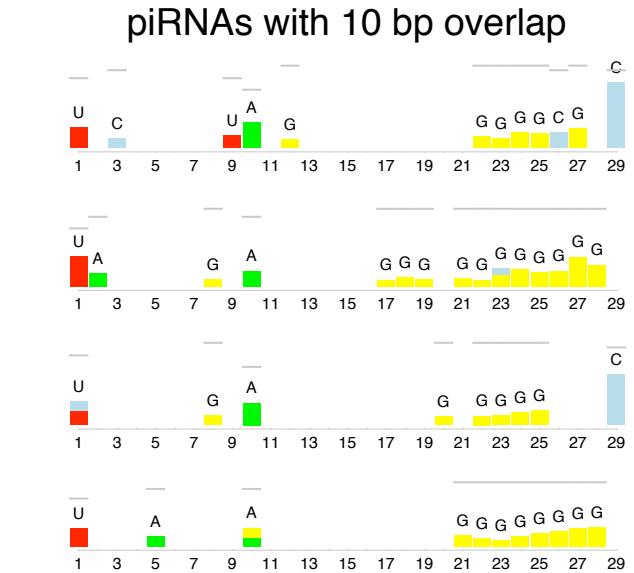

**C**

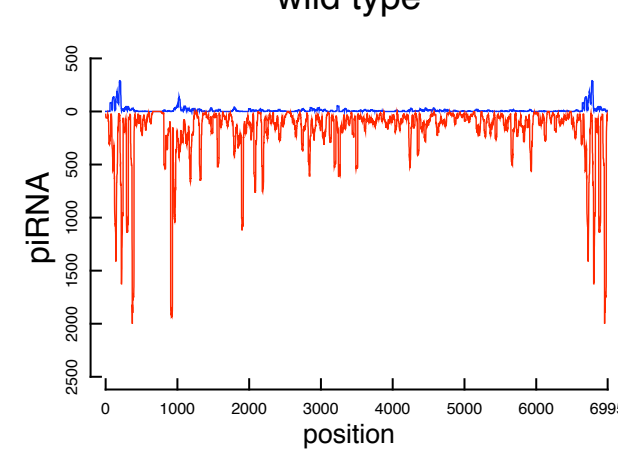

**E**

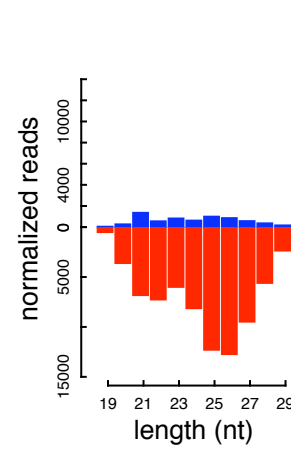

**G**

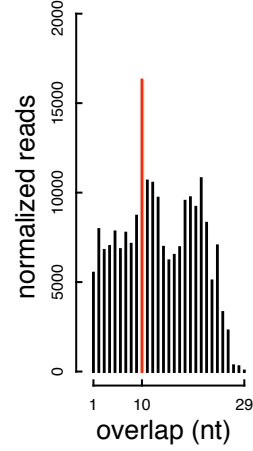

**D**

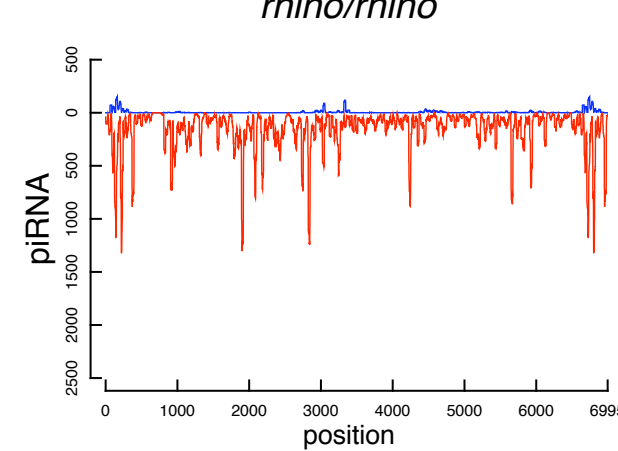

**F**

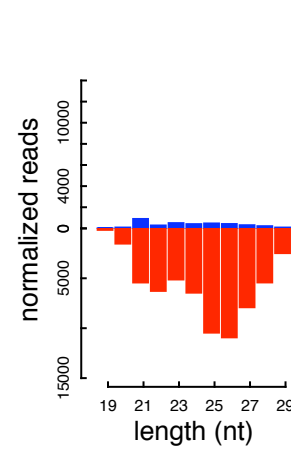

**H**

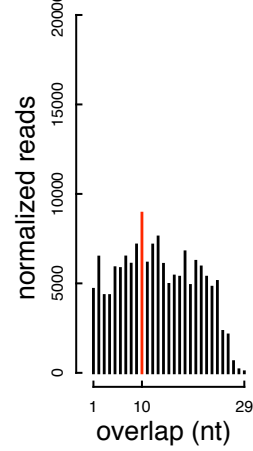

# 3S18

**A**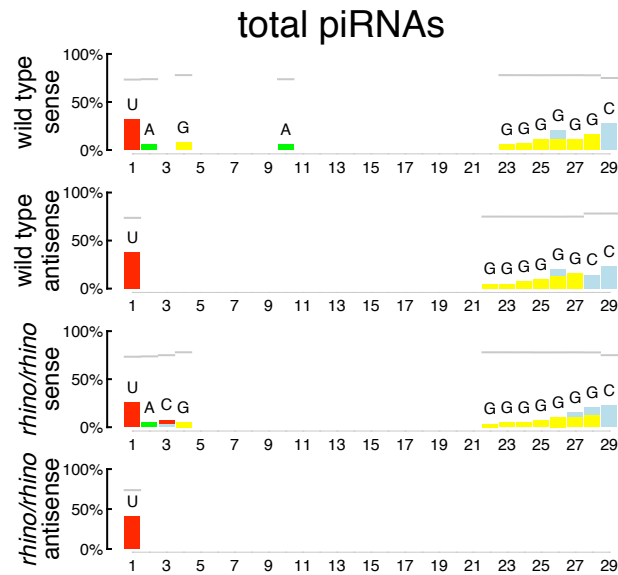**B**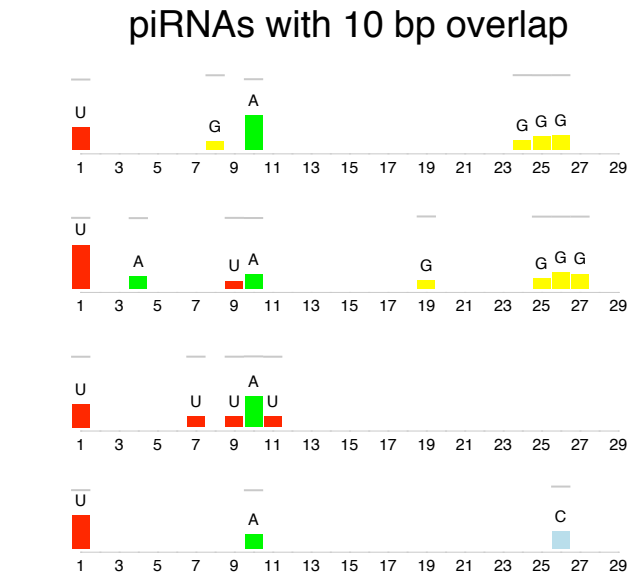**C**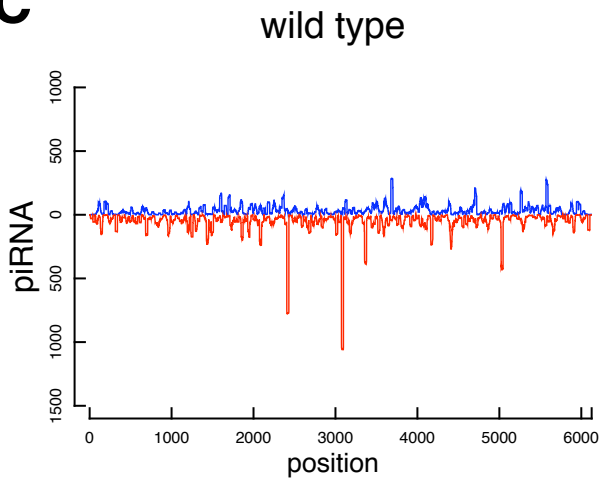**E**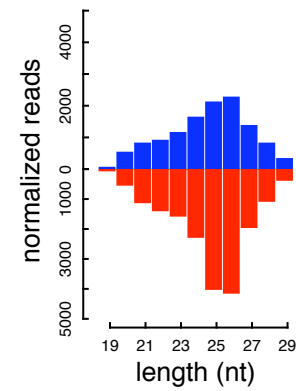**G**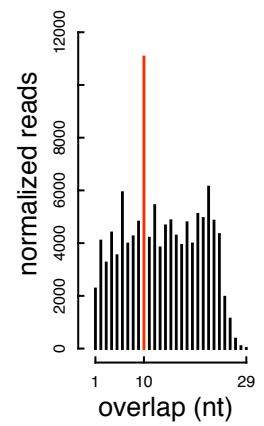**D**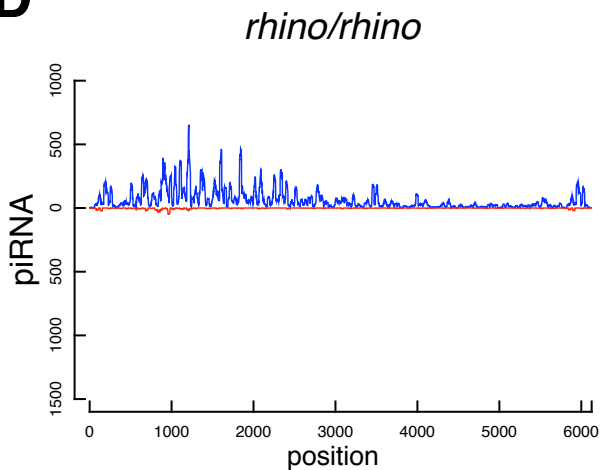**F**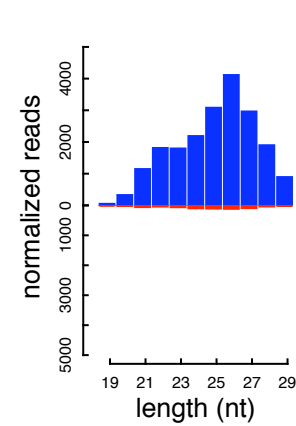**H**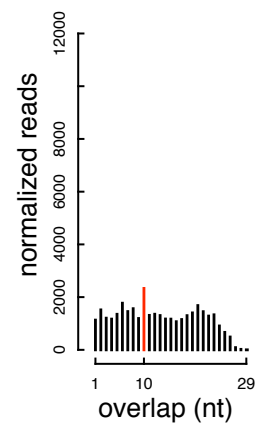

**A**

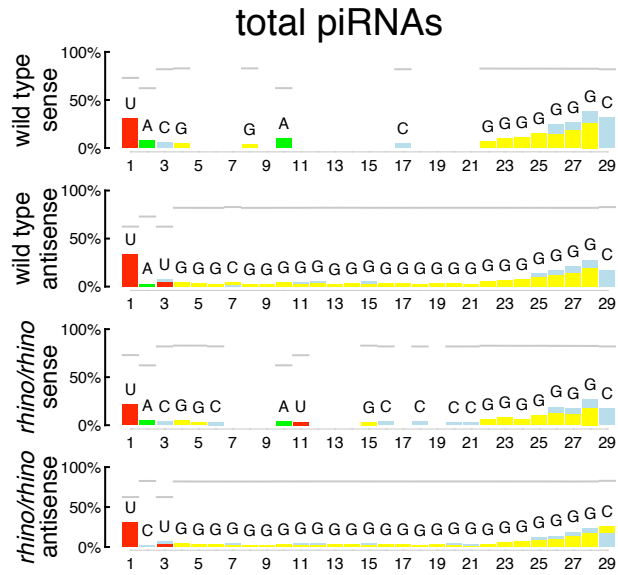

**B**

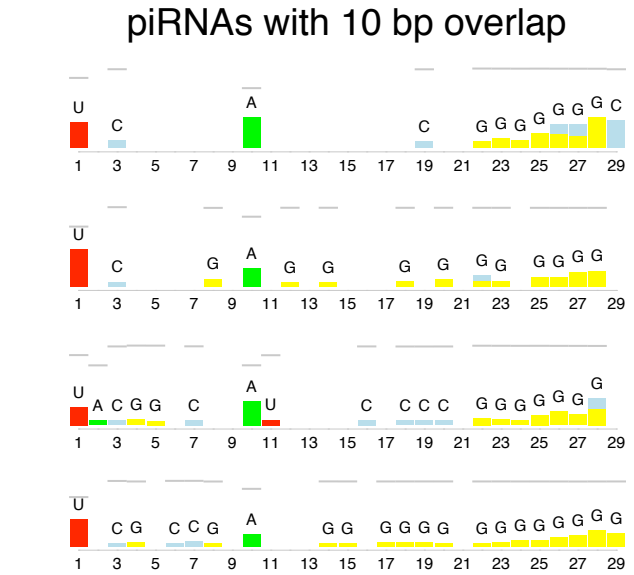

**C**

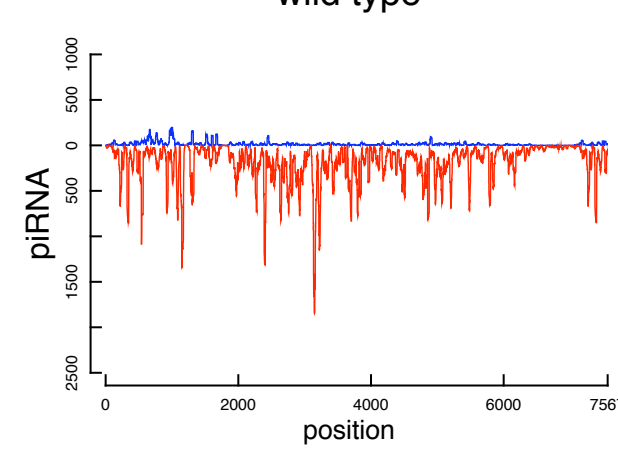

**E**

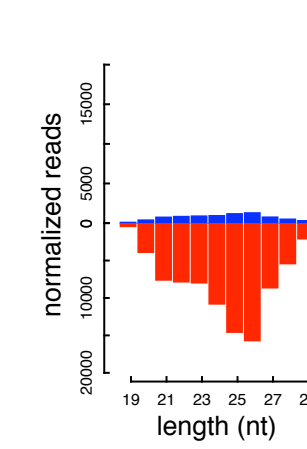

**G**

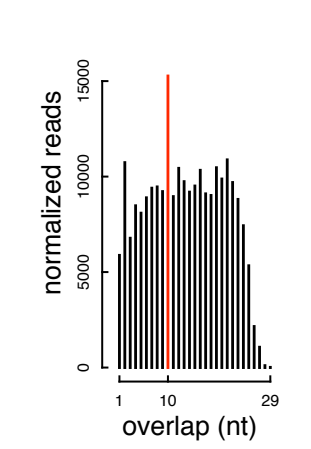

**D**

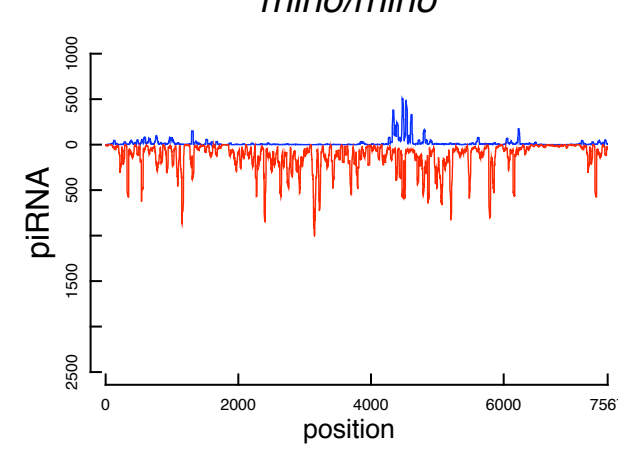

**F**

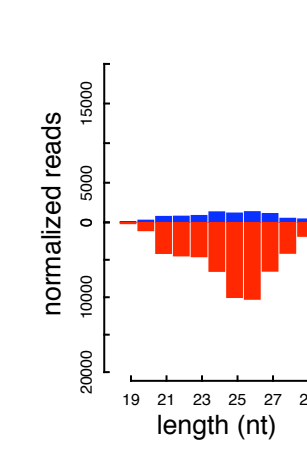

**H**

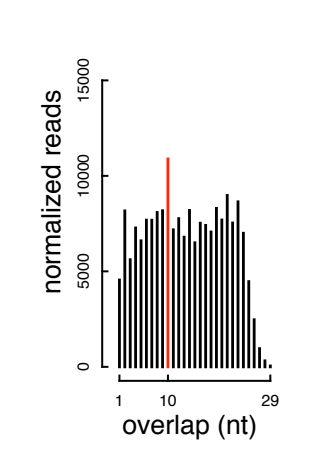

# accord

**A**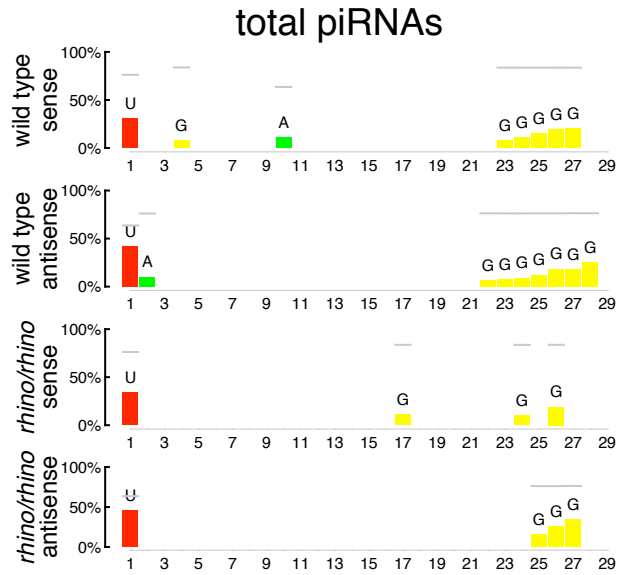**B**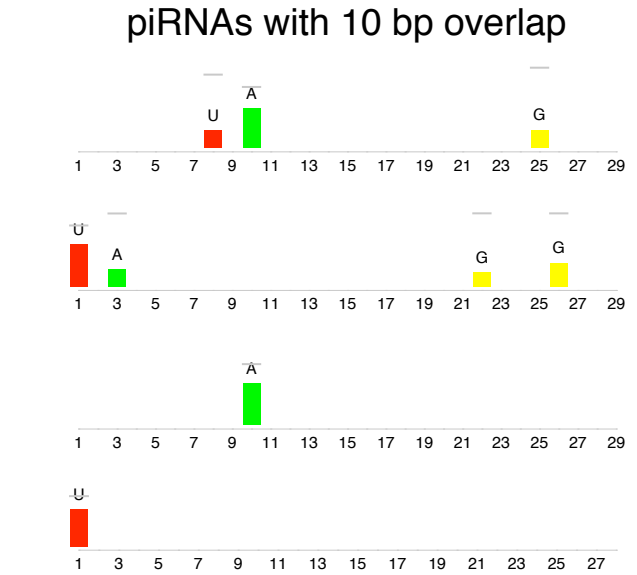**C**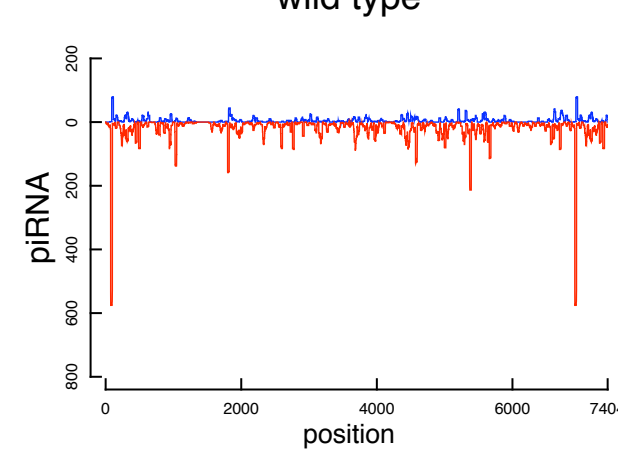**E**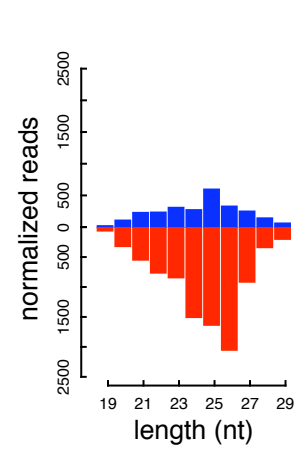**G**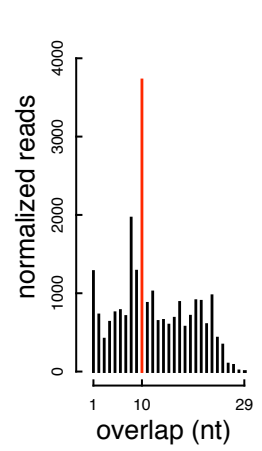**D**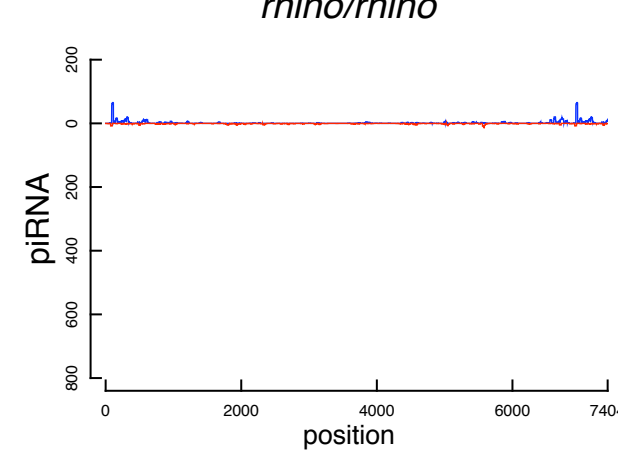**F**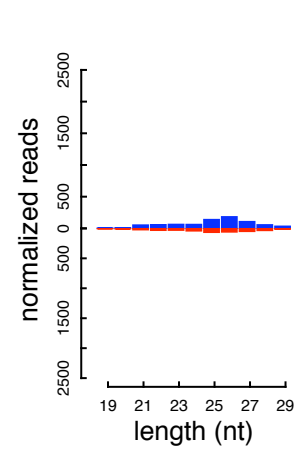**H**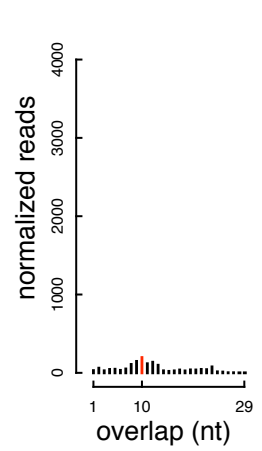

# *accord2*

**A**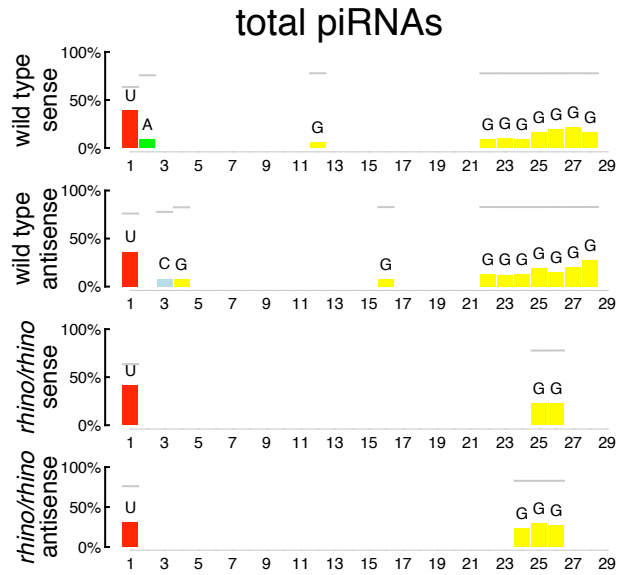**B**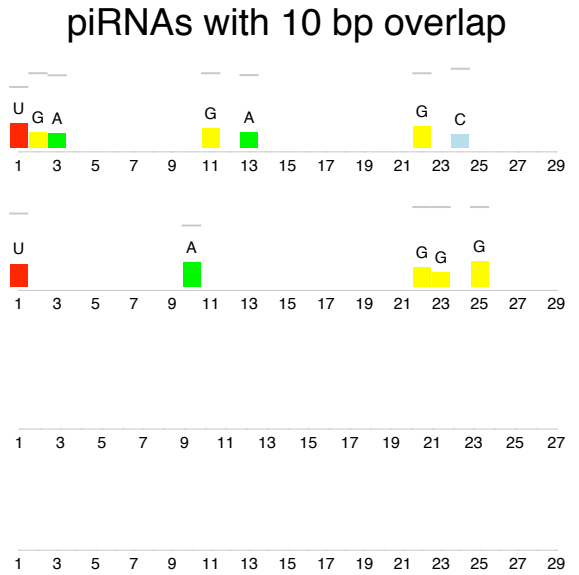**C**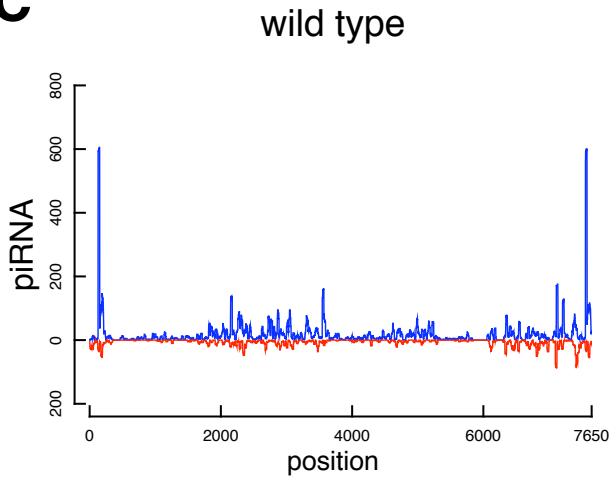**E**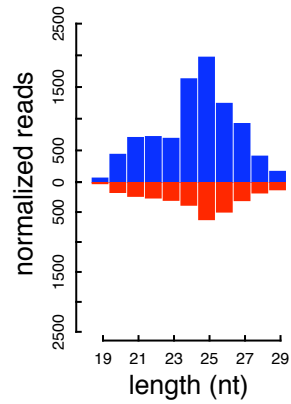**G**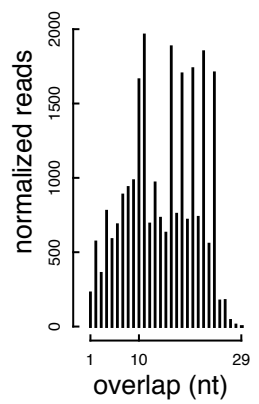**D**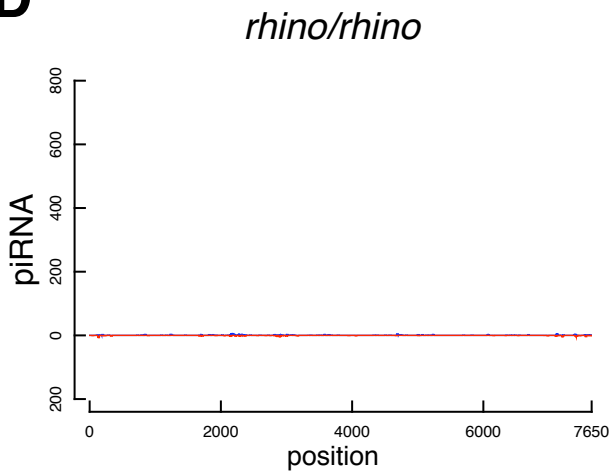**F**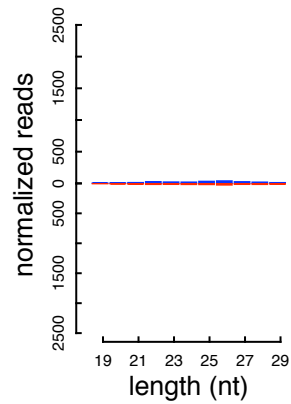**H**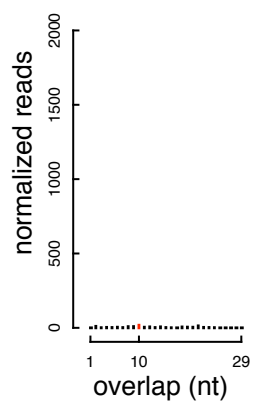



# aurora element

**A**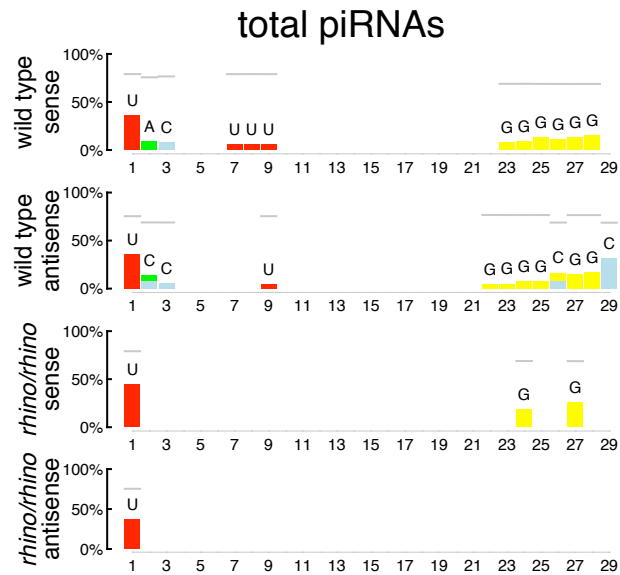**B**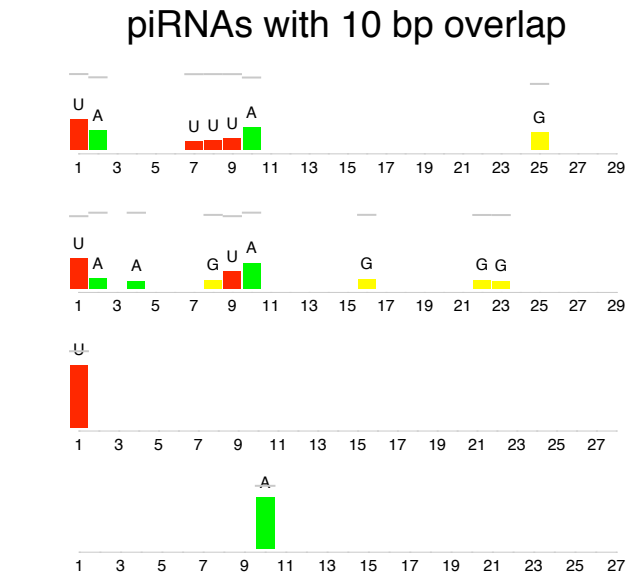**C**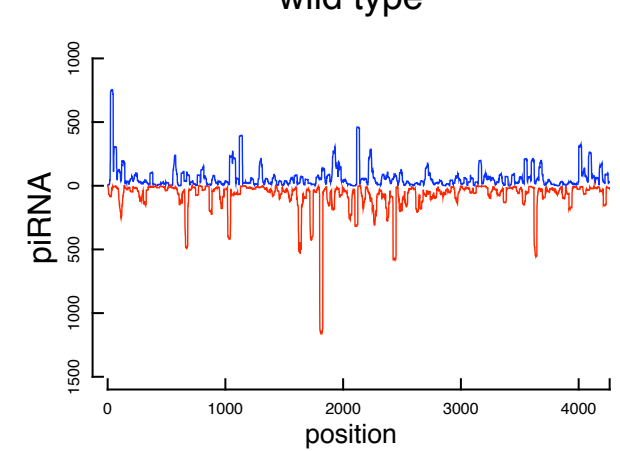**E**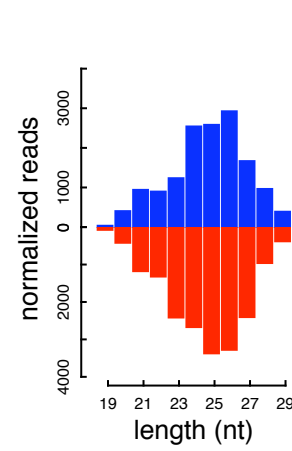**G**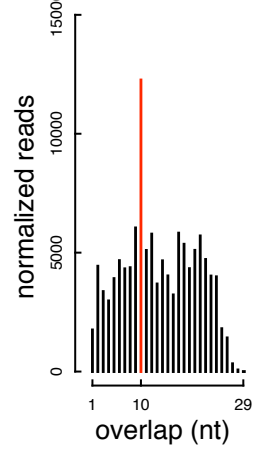**D**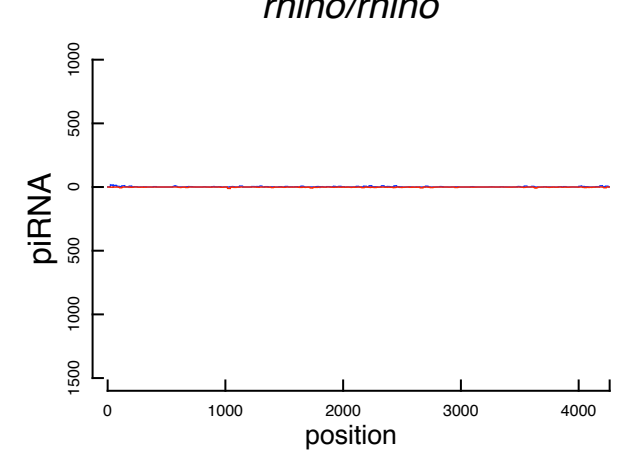**F**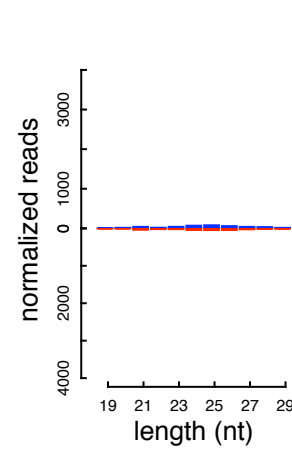**H**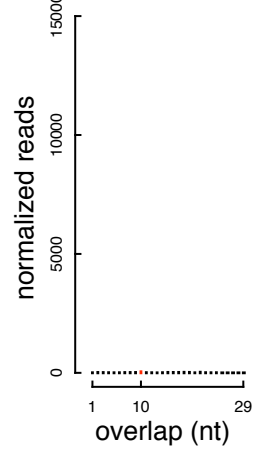

# *baggins*

**A**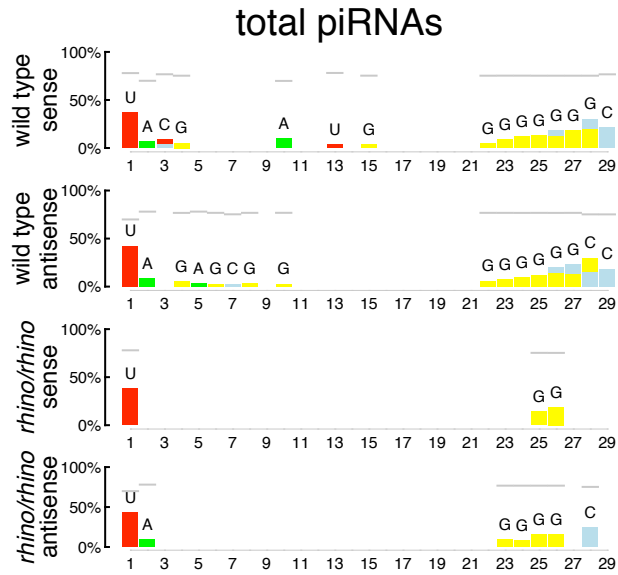**B**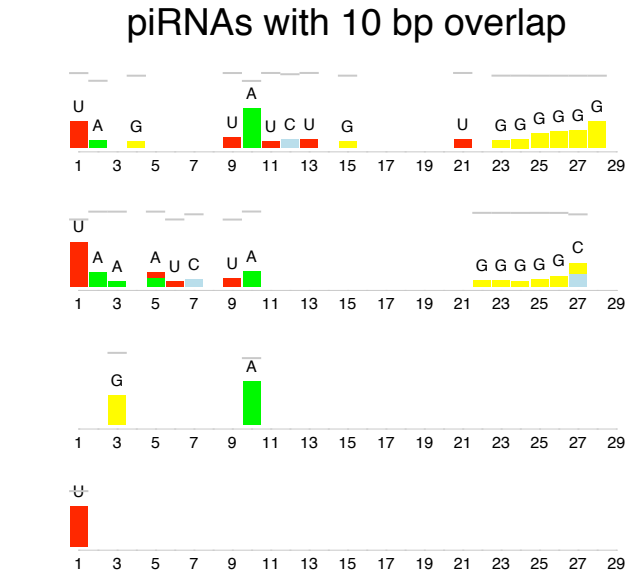**C**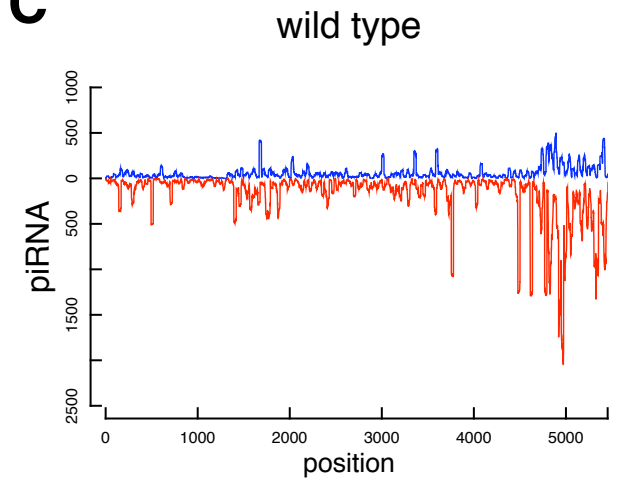**E**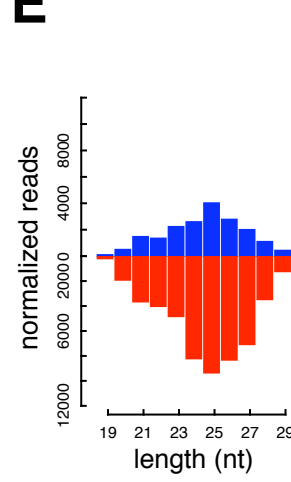**G**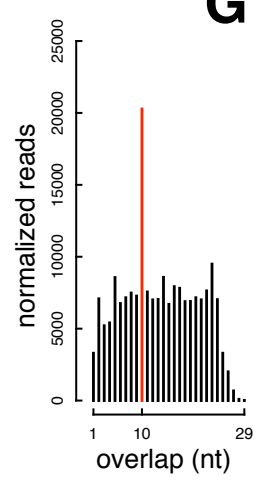**D**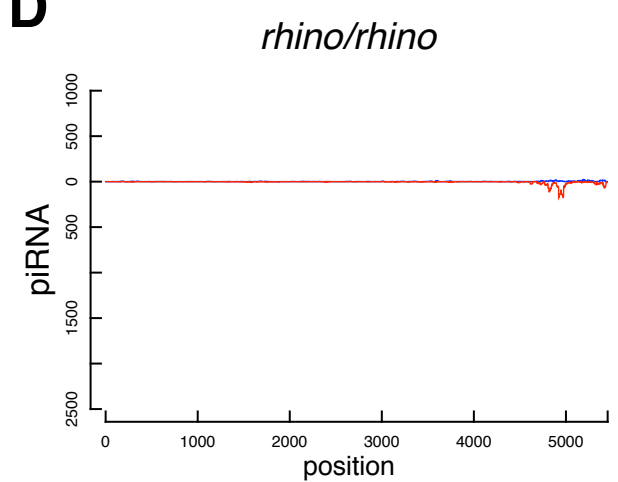**F**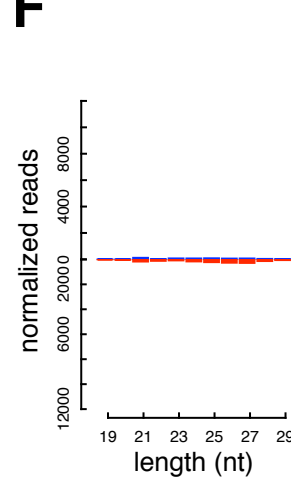**H**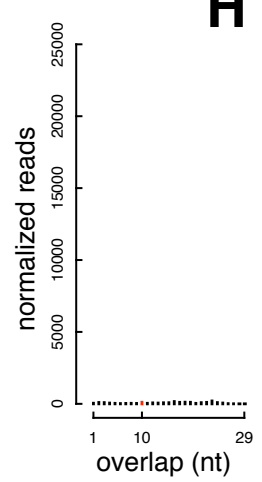

# Bari1

**A**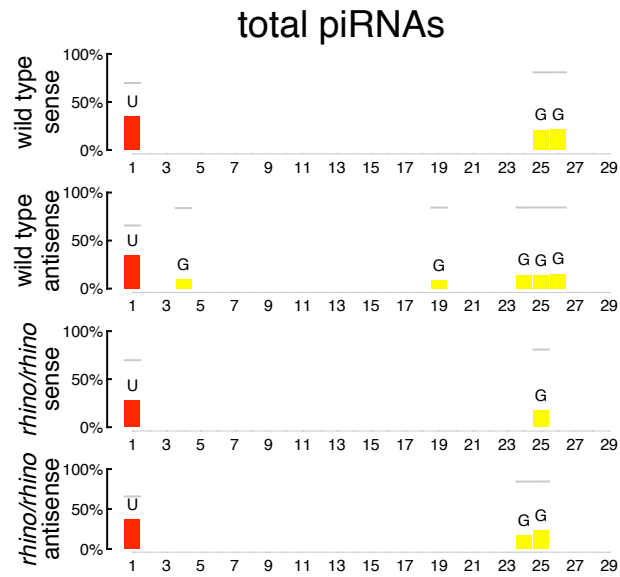**B**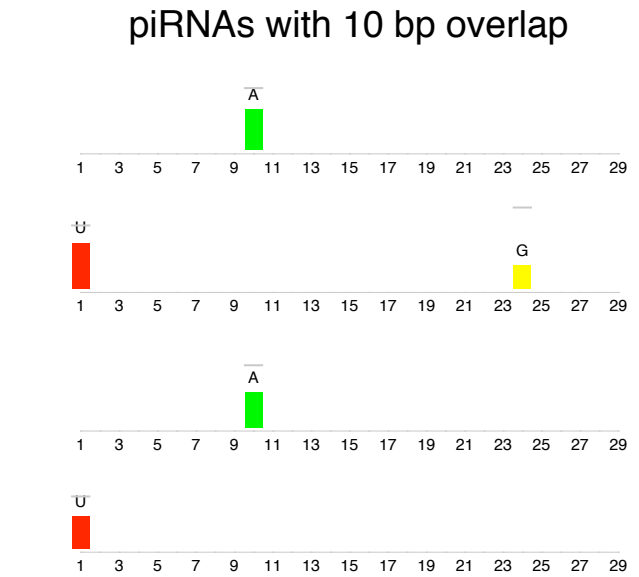**C**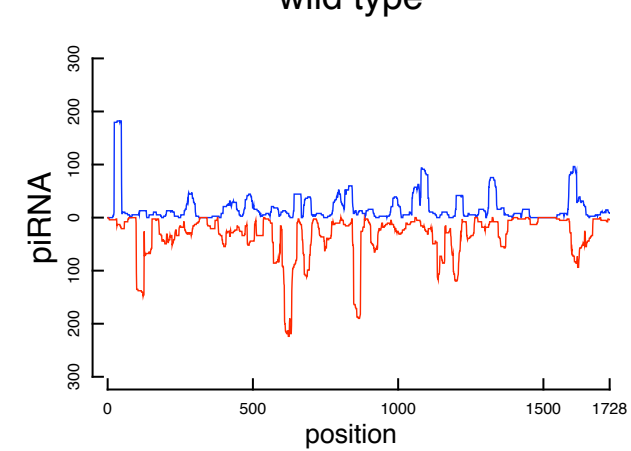**E**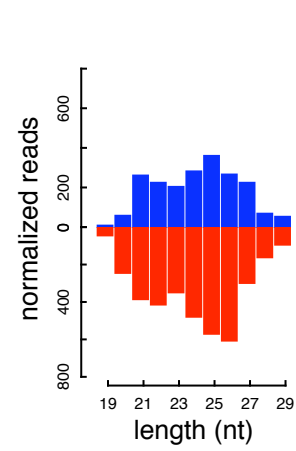**G**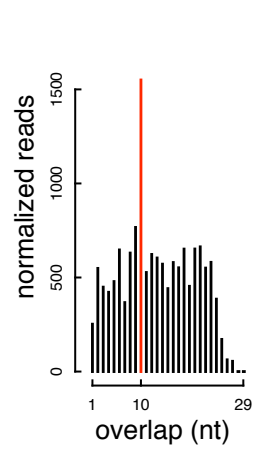**D**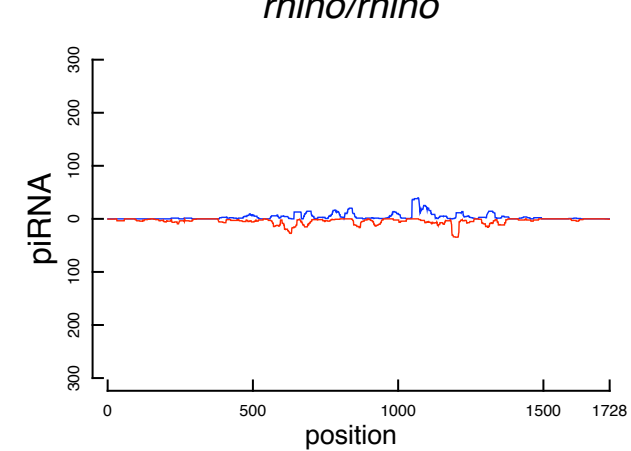**F**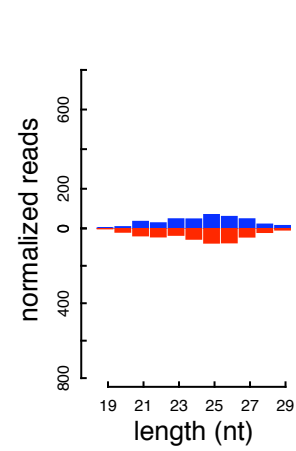**H**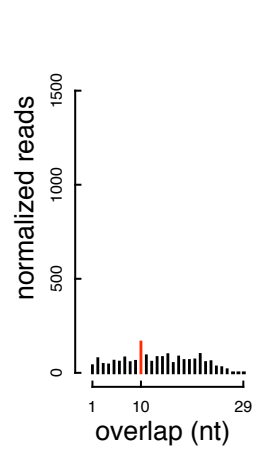

# blood

**A**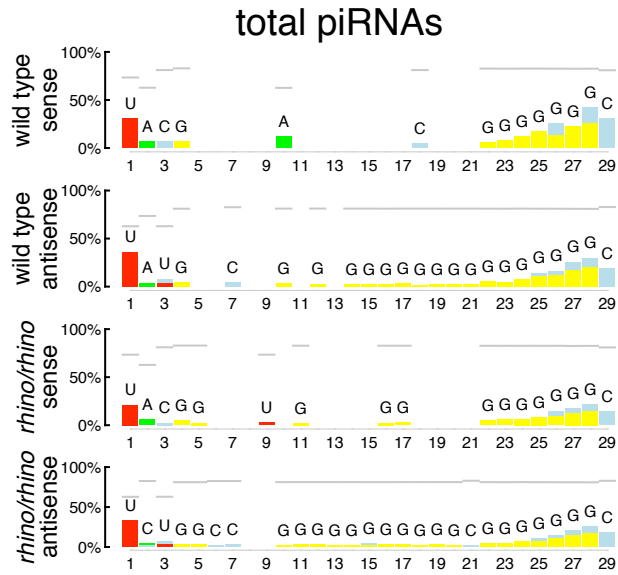**B**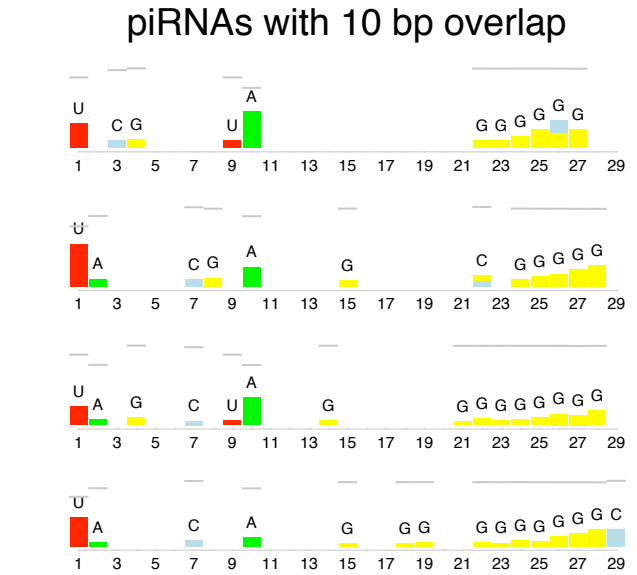**C**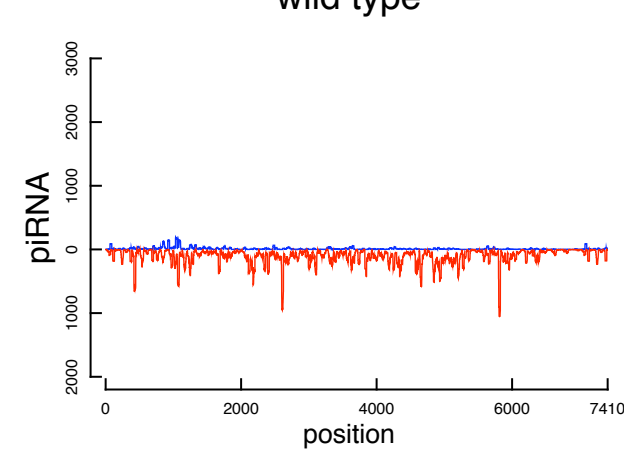**E**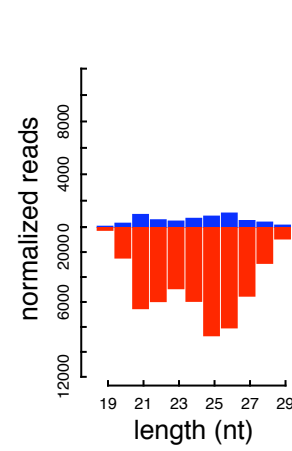**G**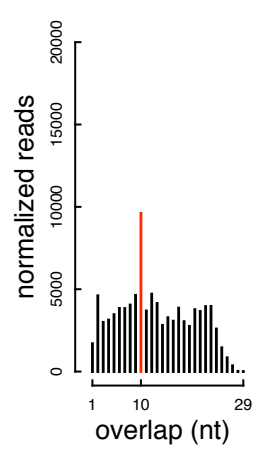**D**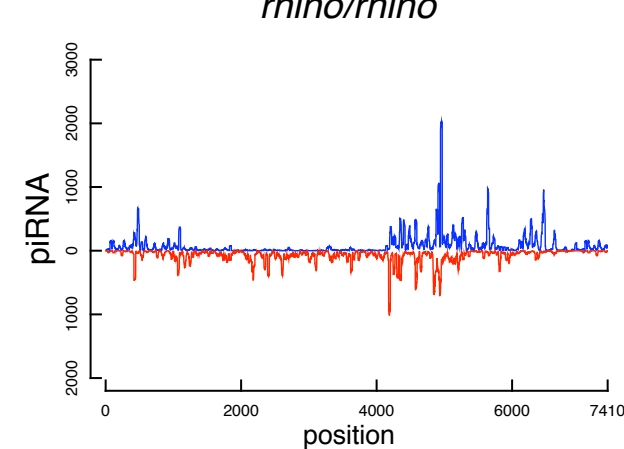**F**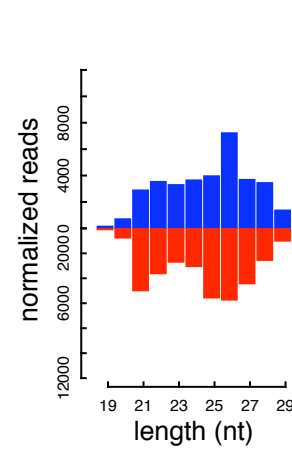**H**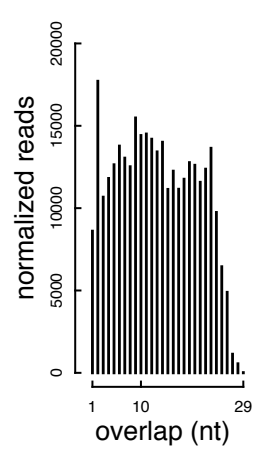

# BS

**A**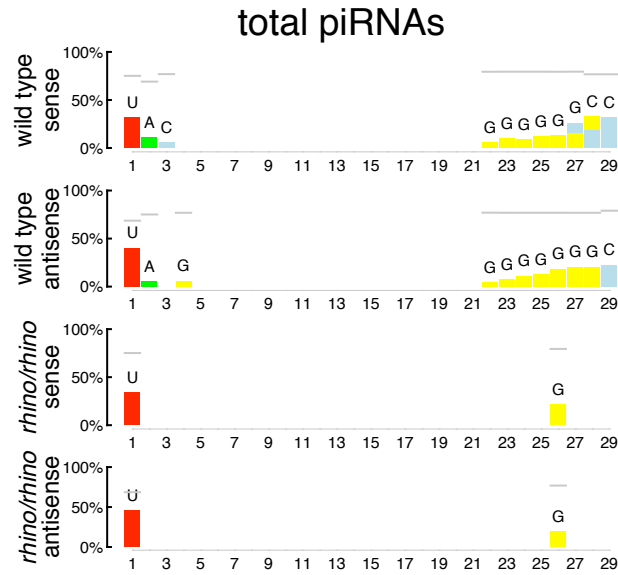**B**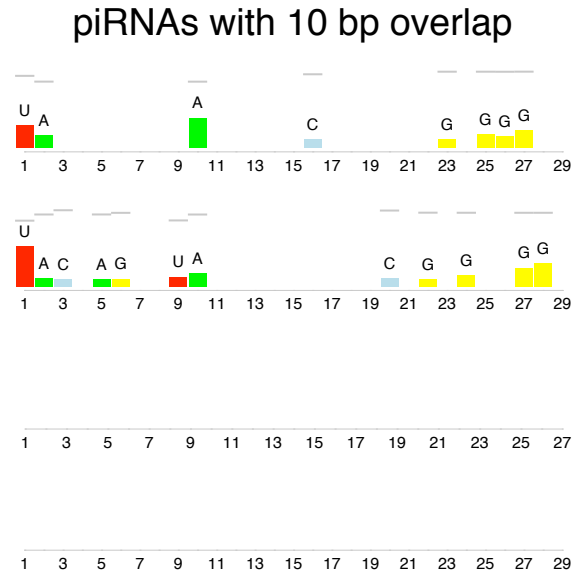**C**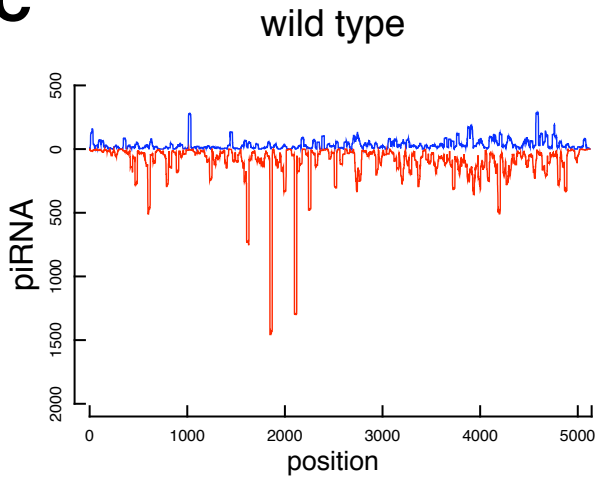**E**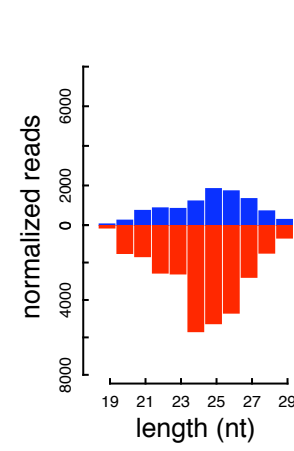**G**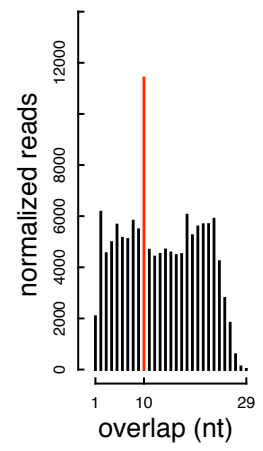**D**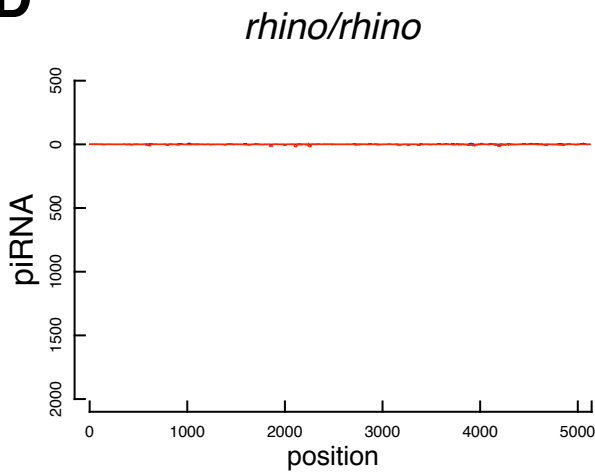**F**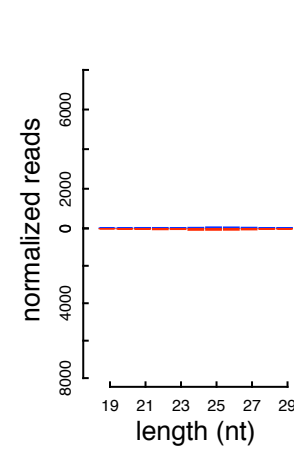**H**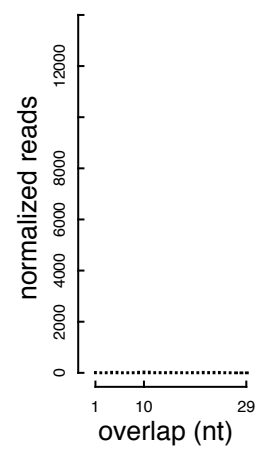

# BS3

**A**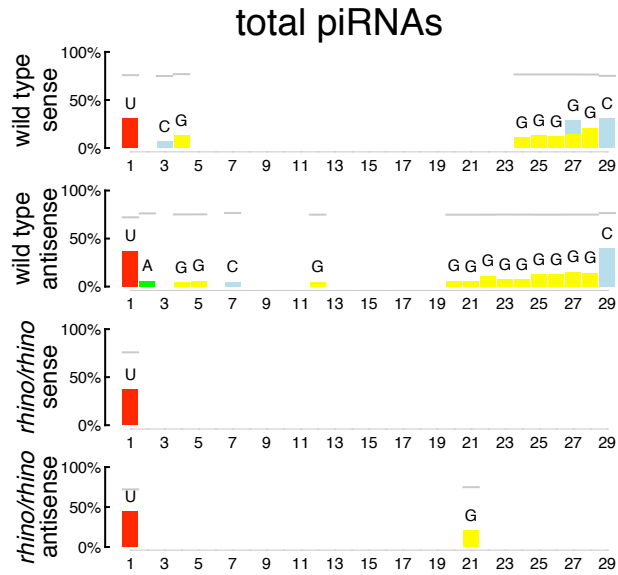**B**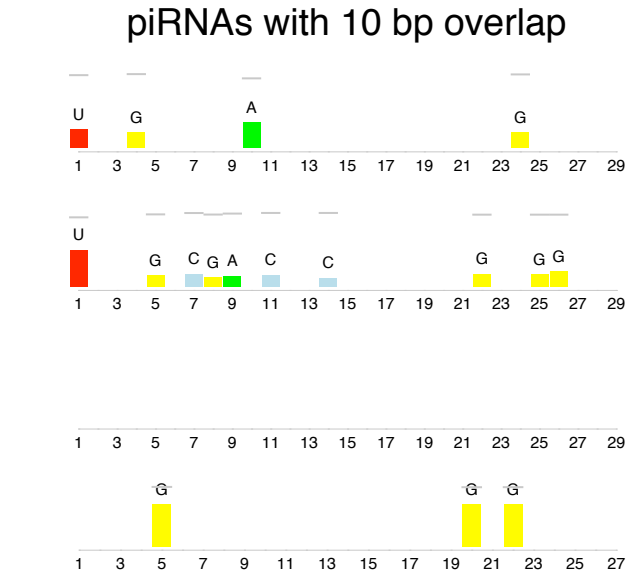**C**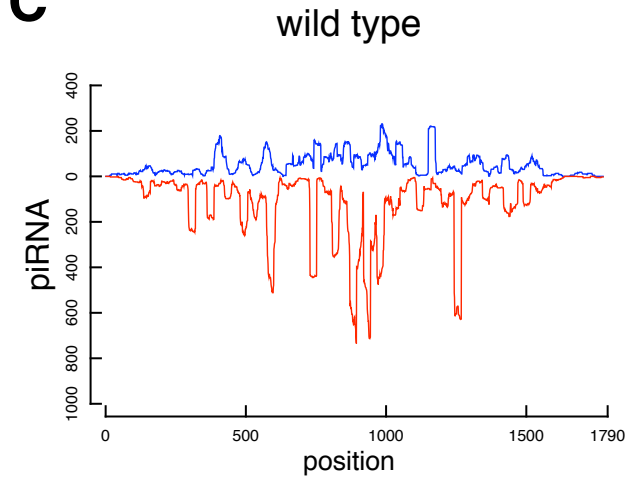**E**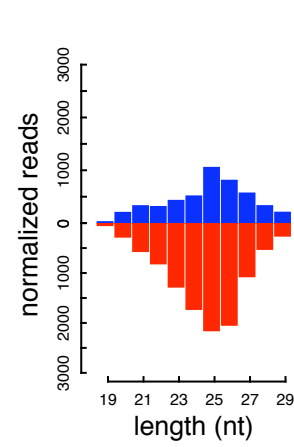**G**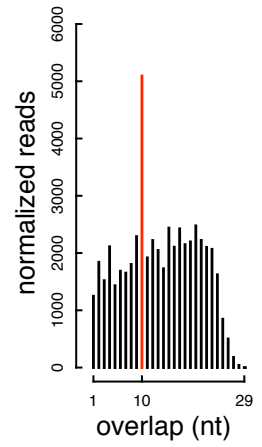**D**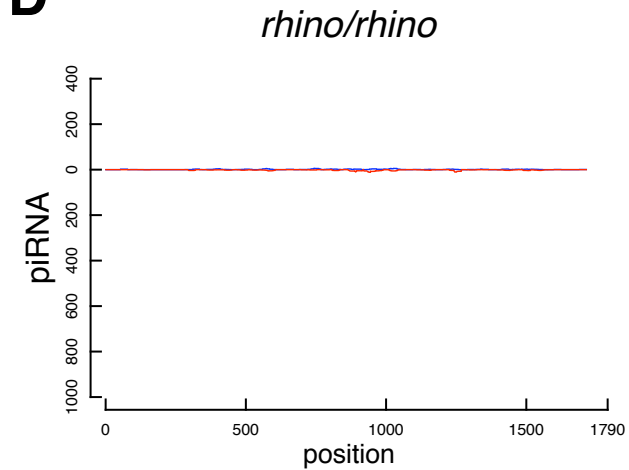**F**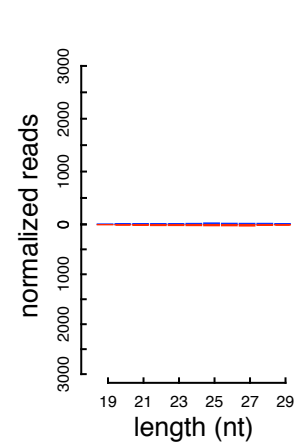**H**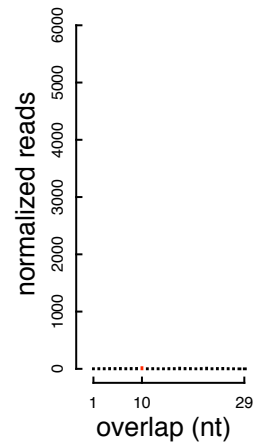

# Burdock

**A**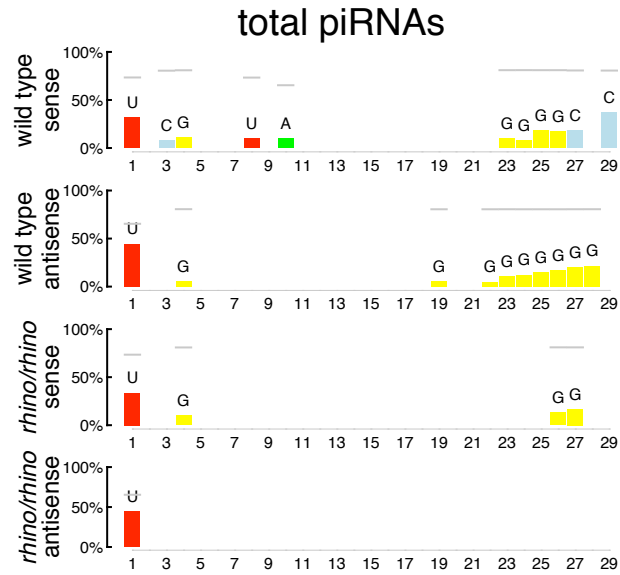**B**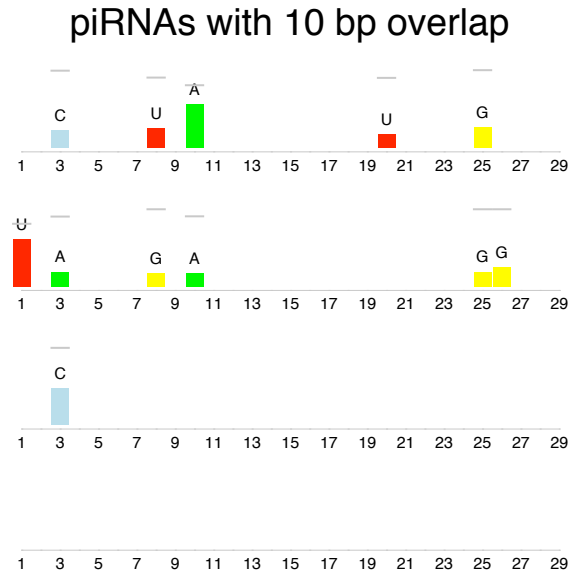**C**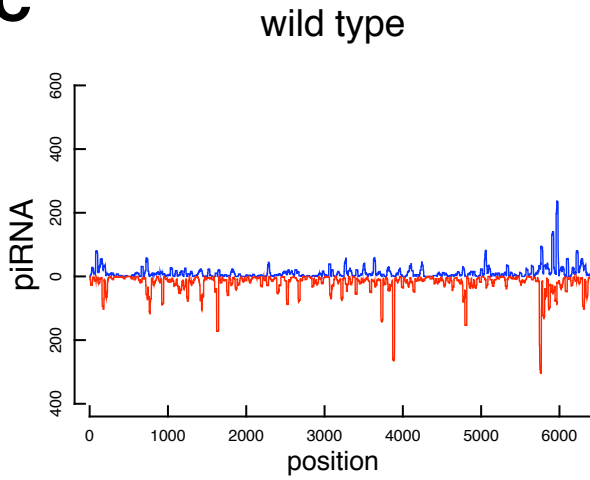**E**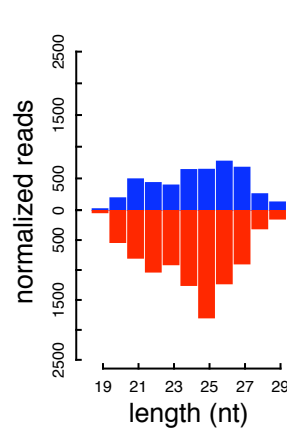**G**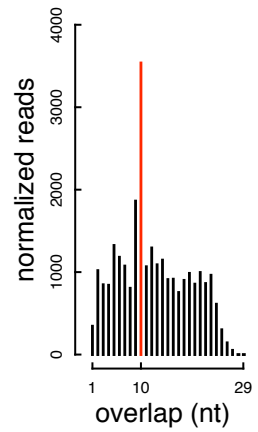**D**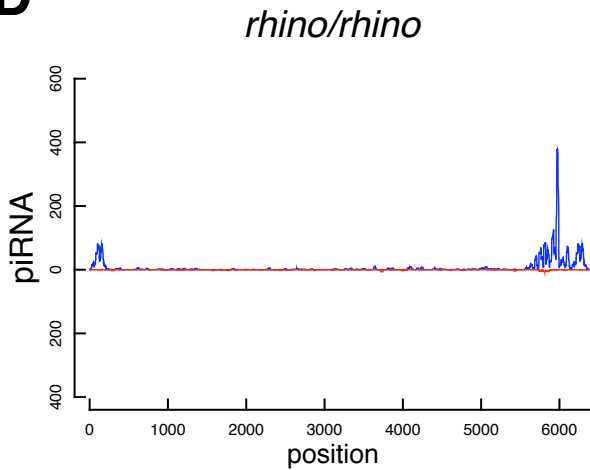**F**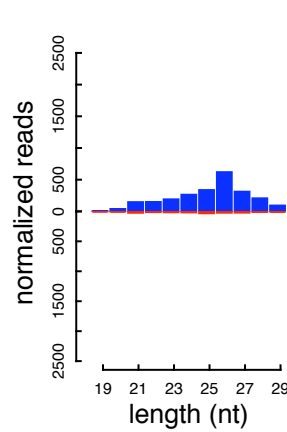**H**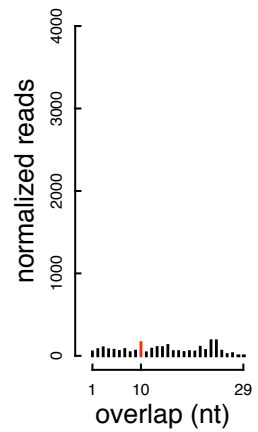

# Circe

**A**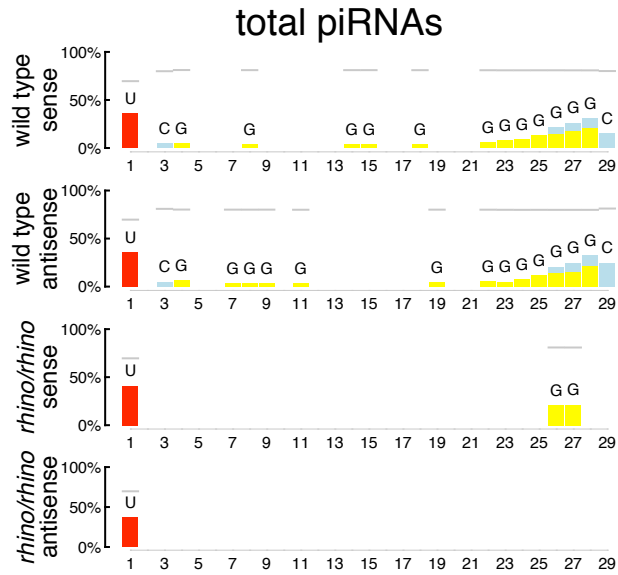**B**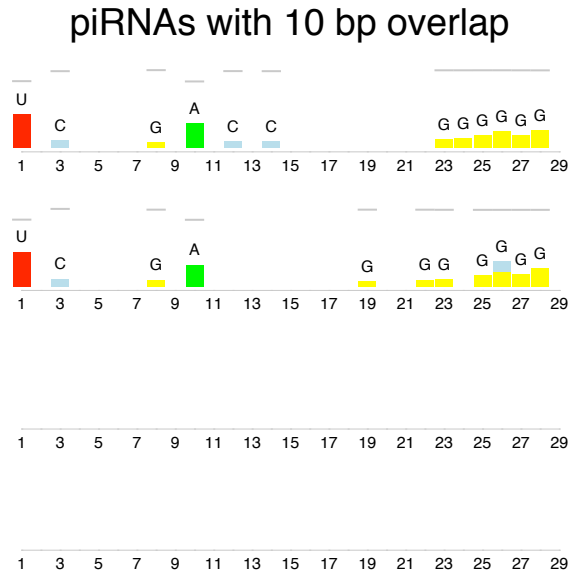**C**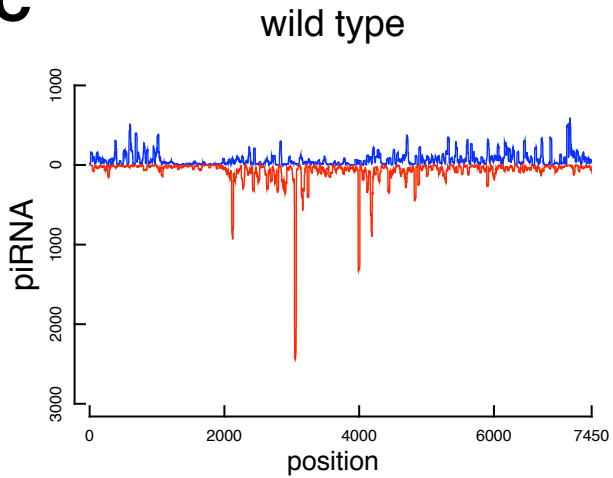**E**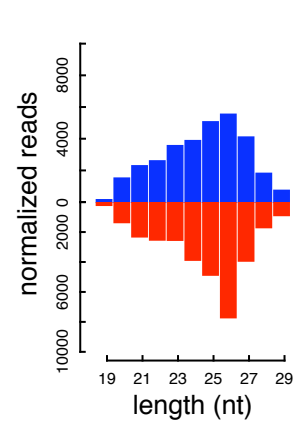**G**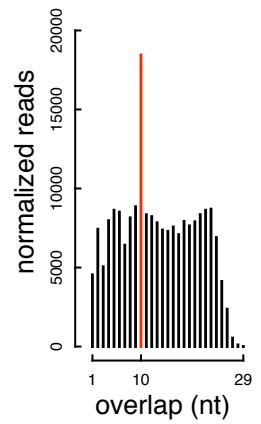**D**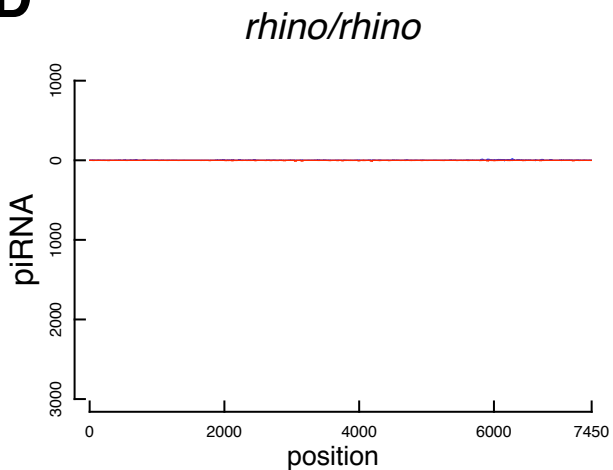**F**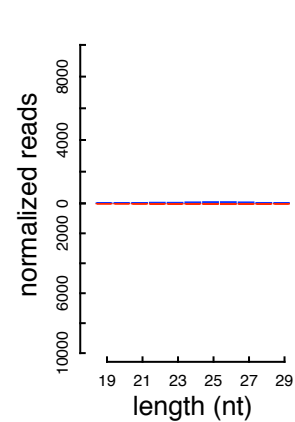**H**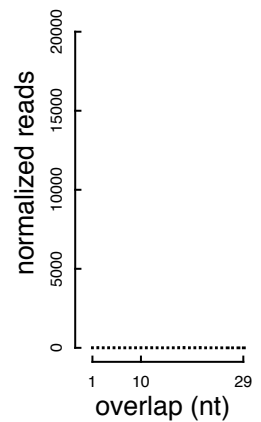



# *copia*

**A**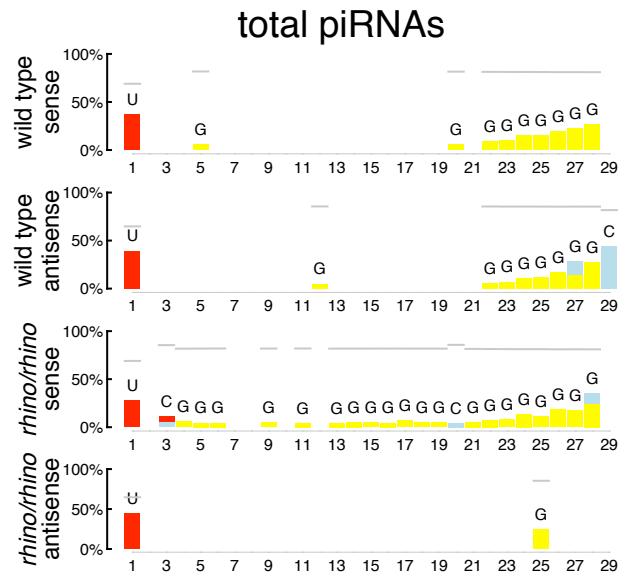**B**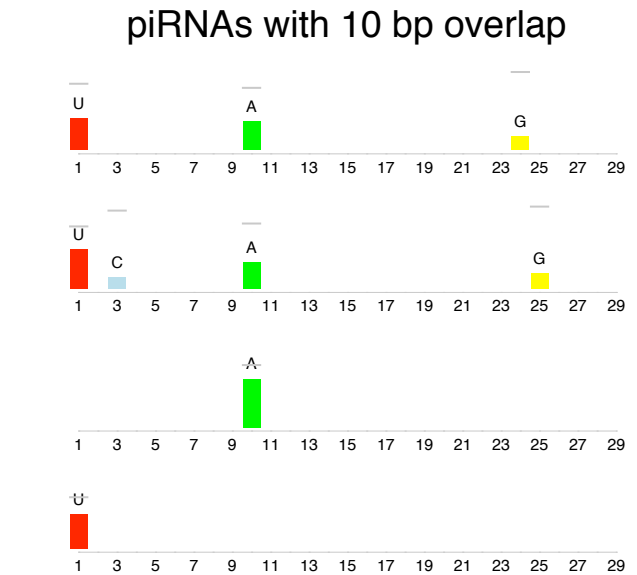**C**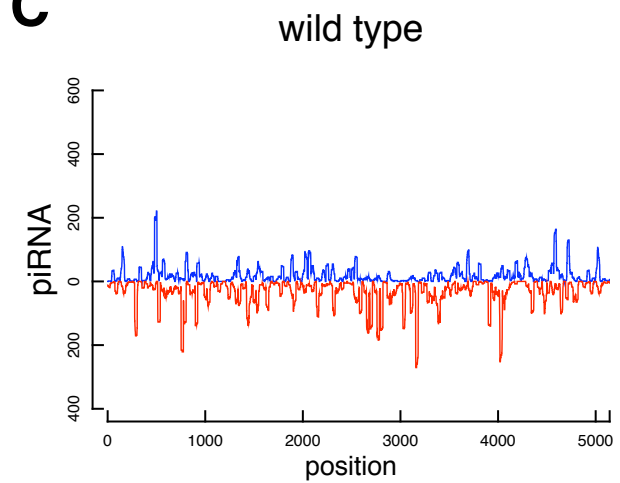**E**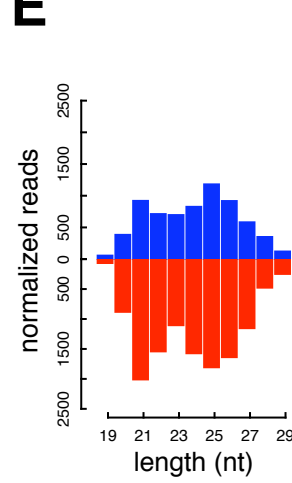**G**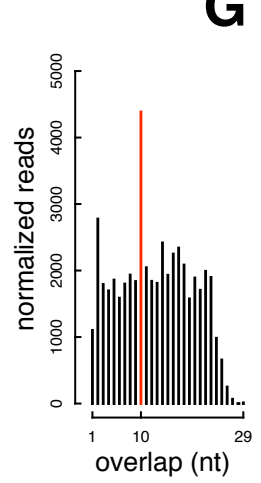**D**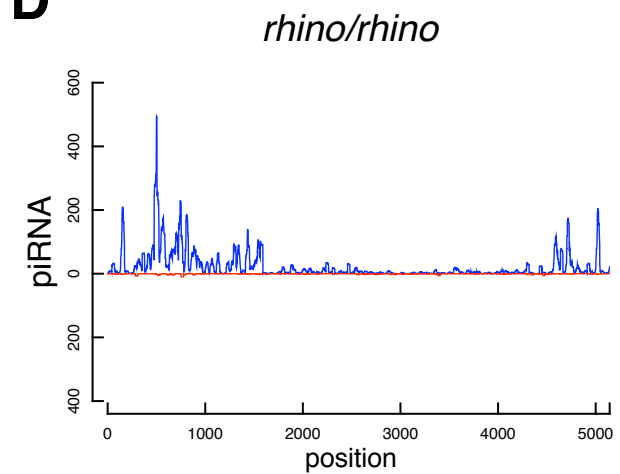**F**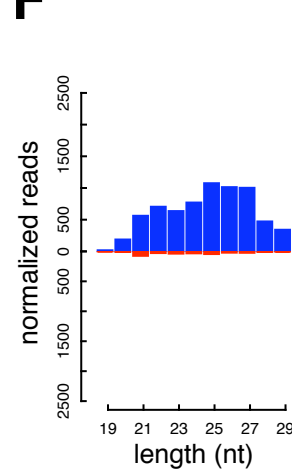**H**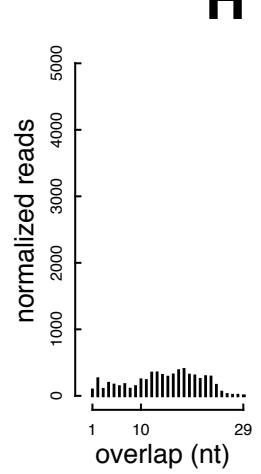

# Cr1a

**A**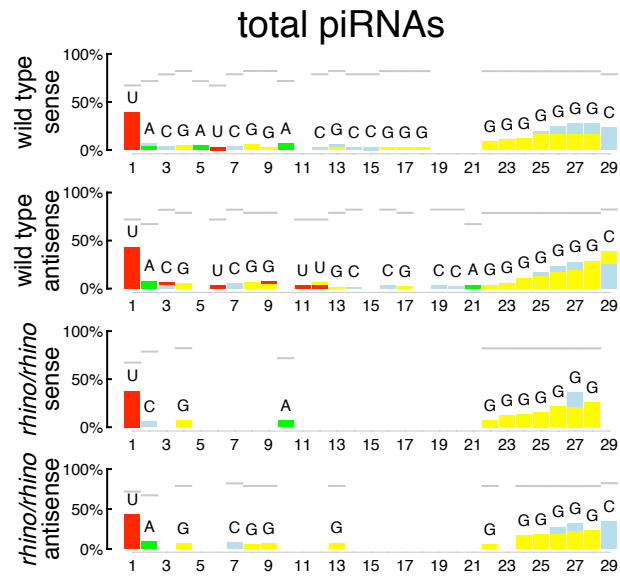**B**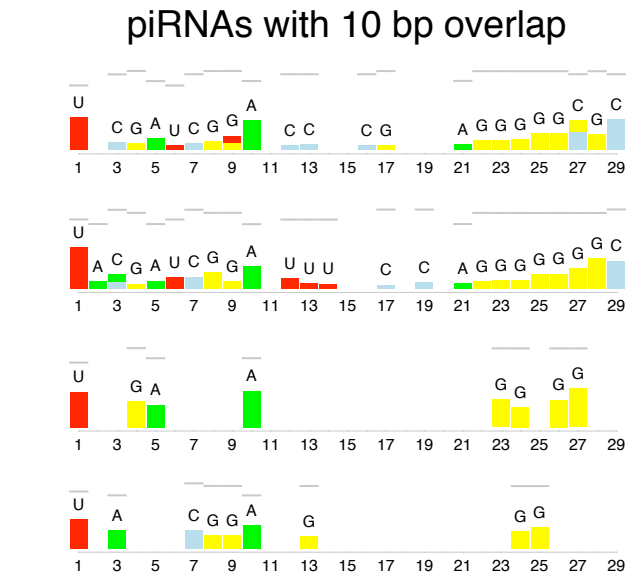**C**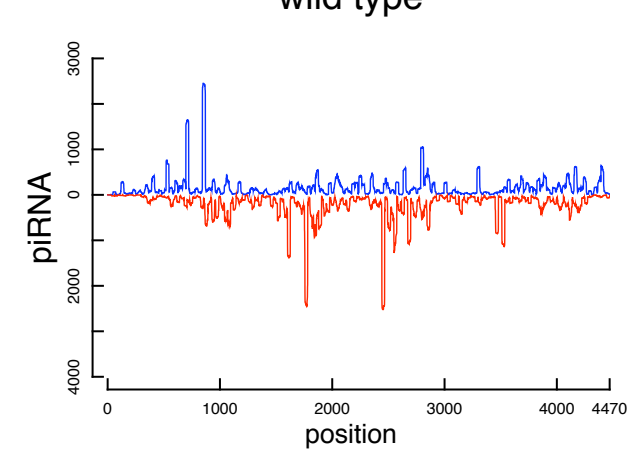**E**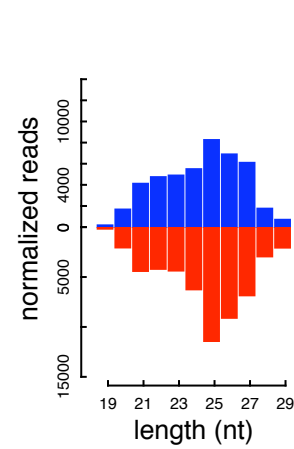**G**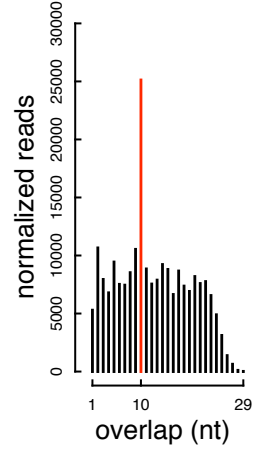**D**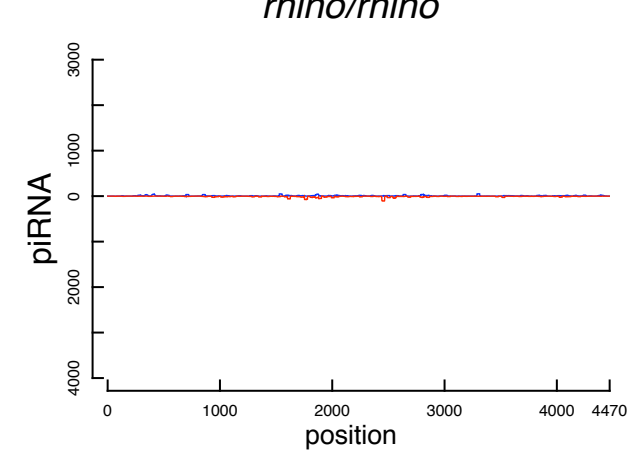**F**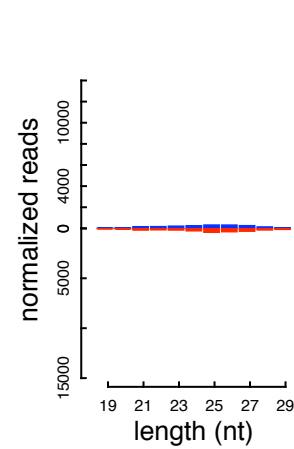**H**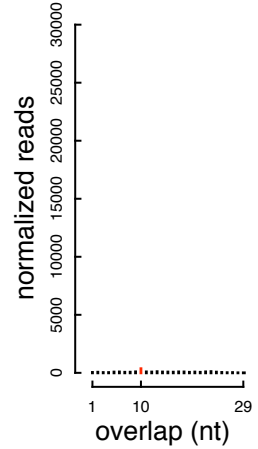

# *diver*

**A**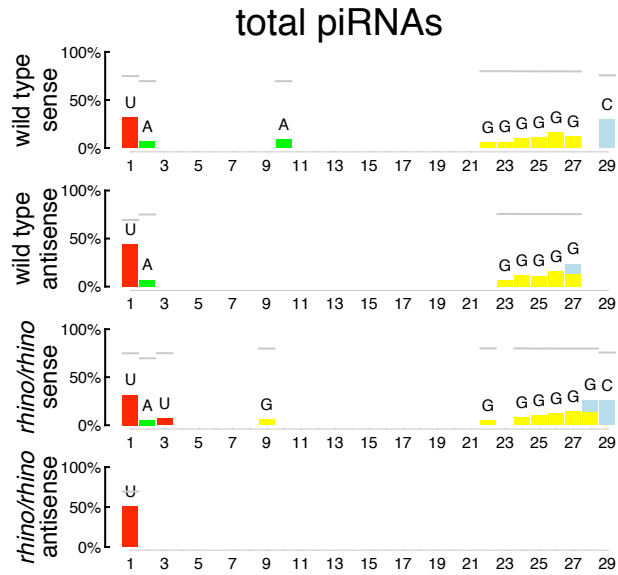**B**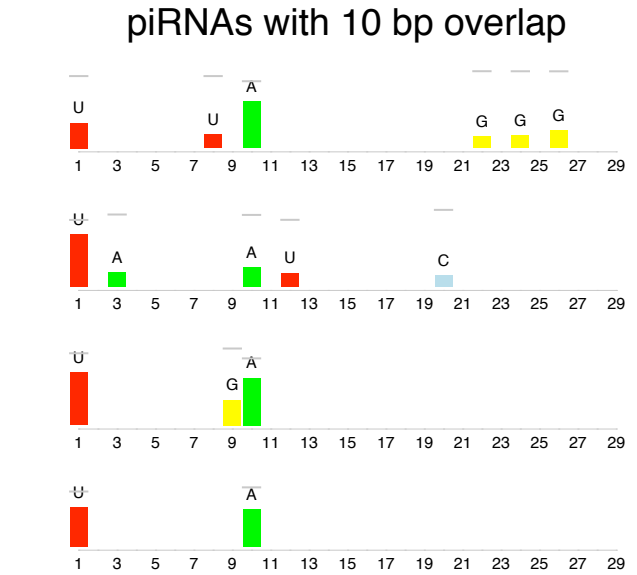**C**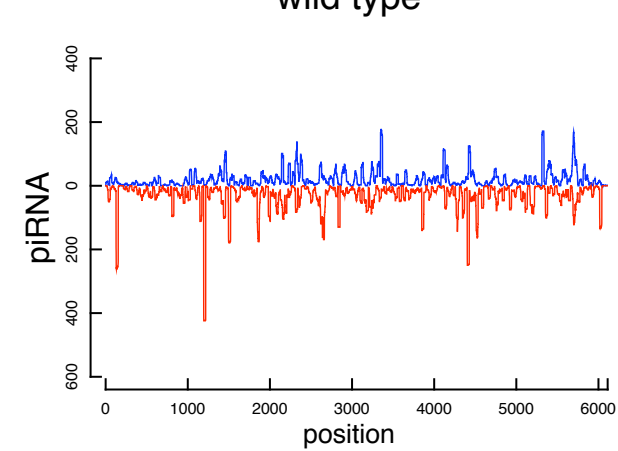**E**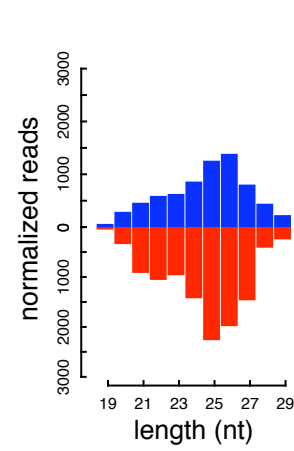**G**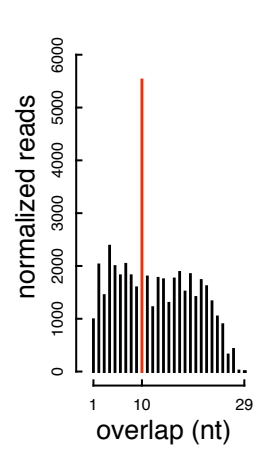**D**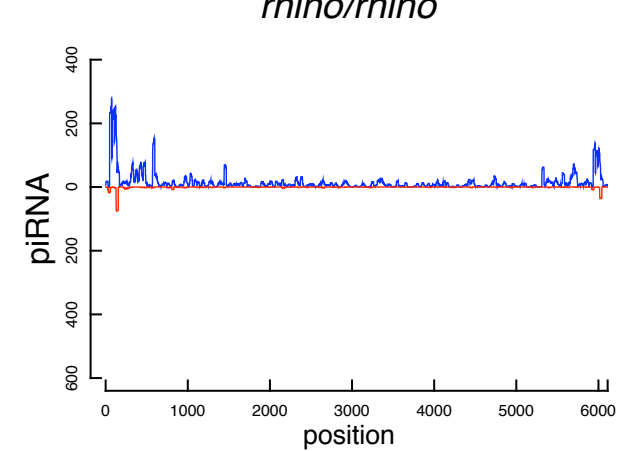**F**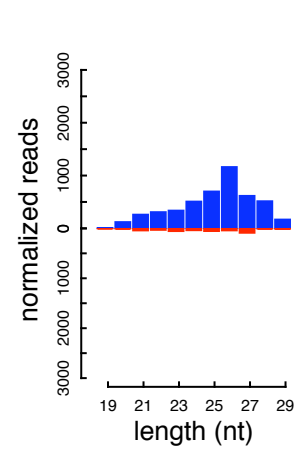**H**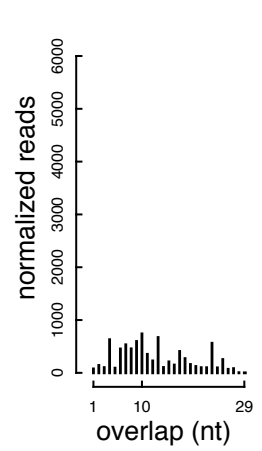

# *diver2*

**A**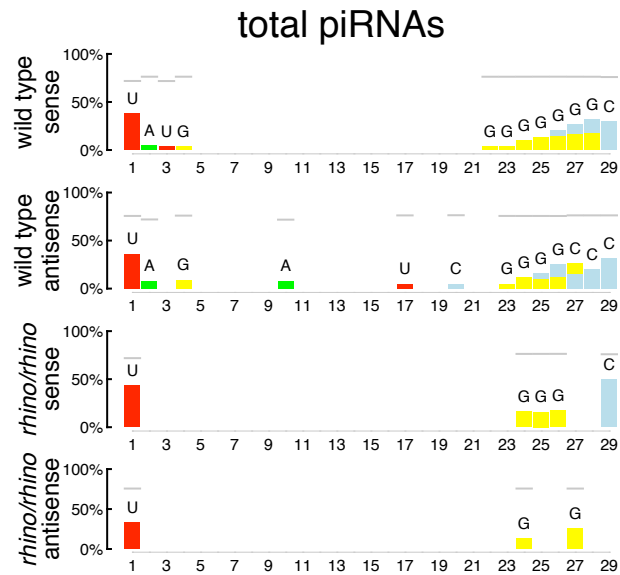**B**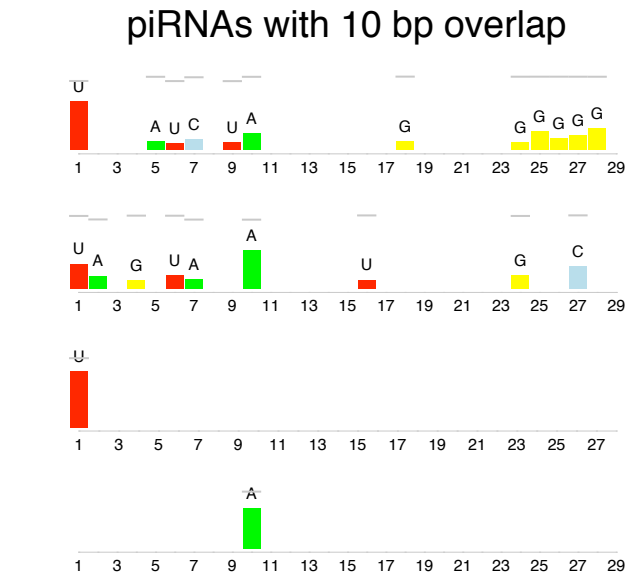**C**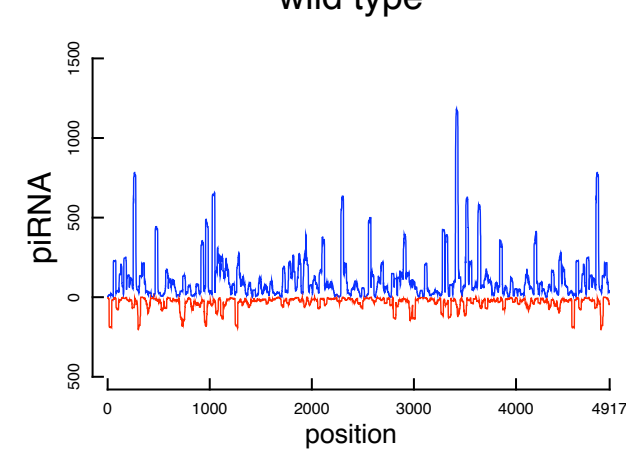**E**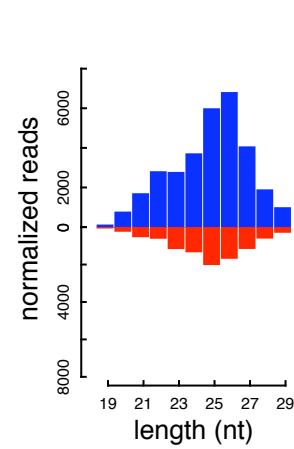**G**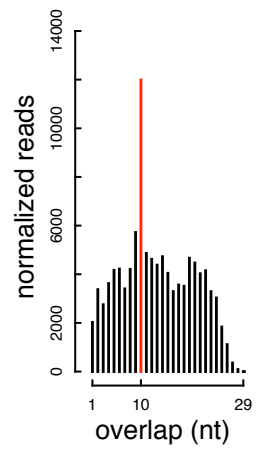**D**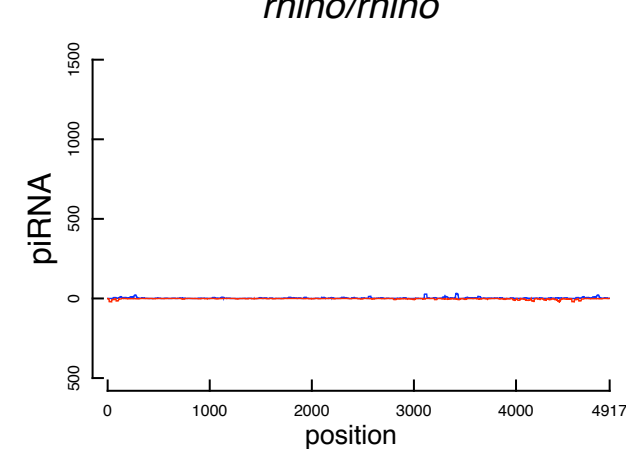**F**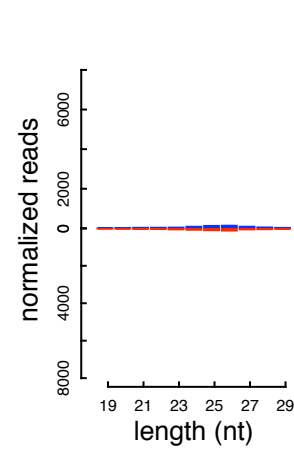**H**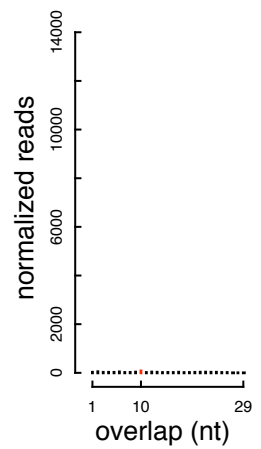

# Dm88

**A**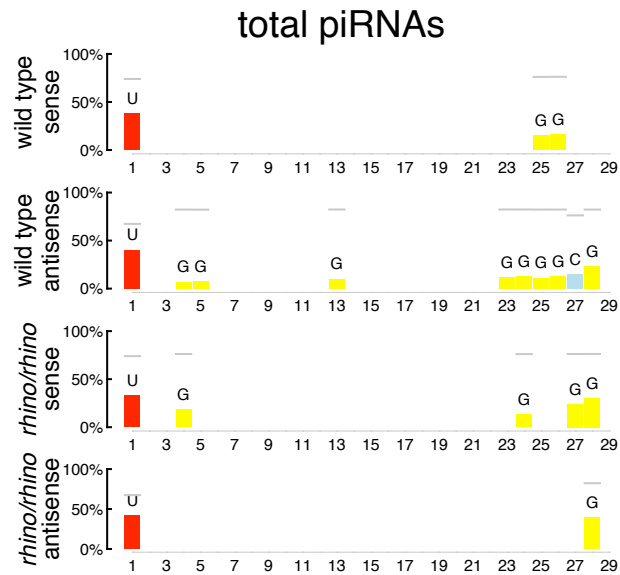**B**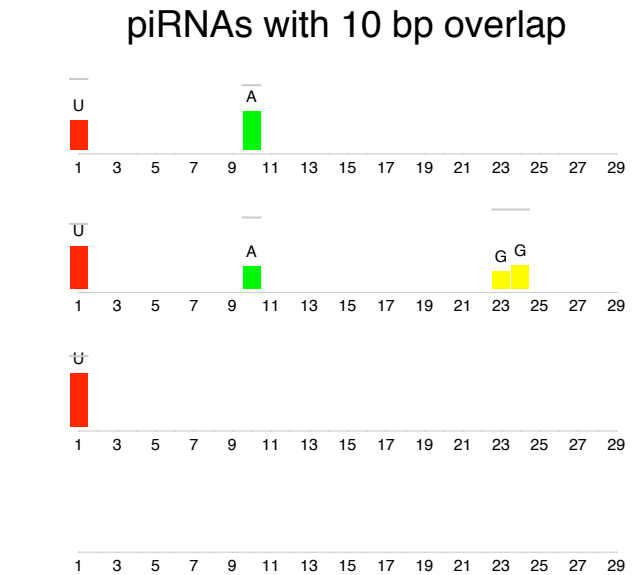**C**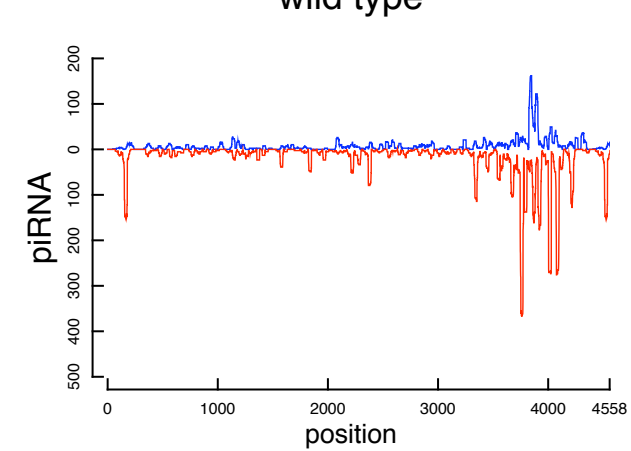**E**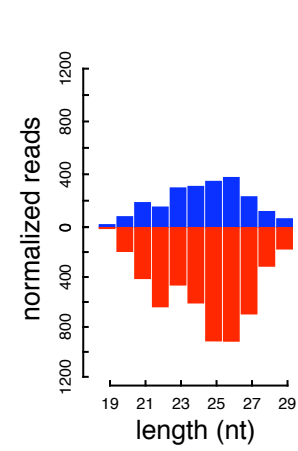**G**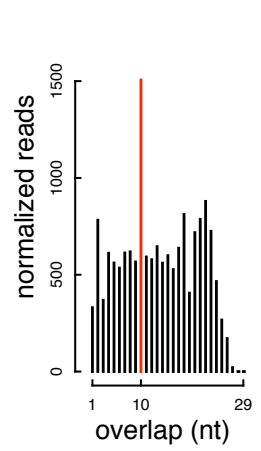**D**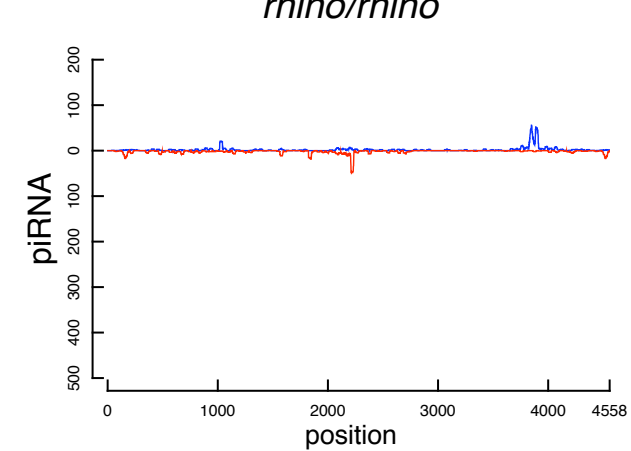**F**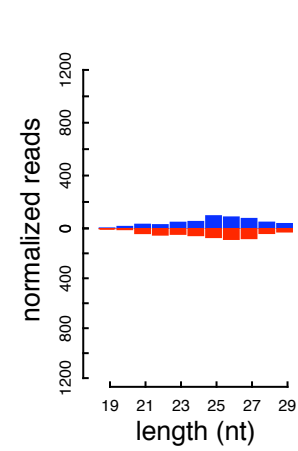**H**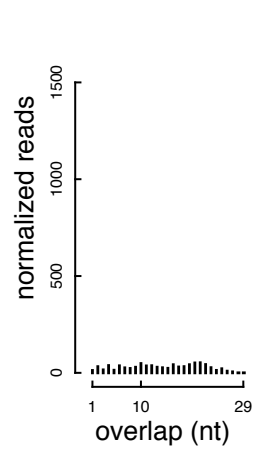

# Doc

**A**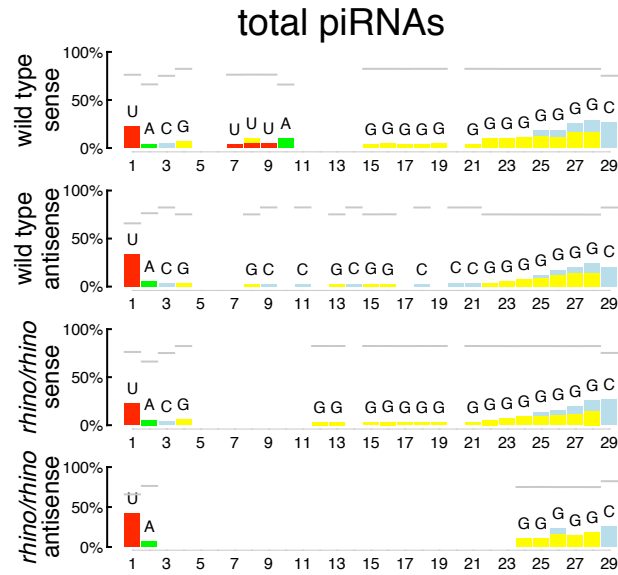**B**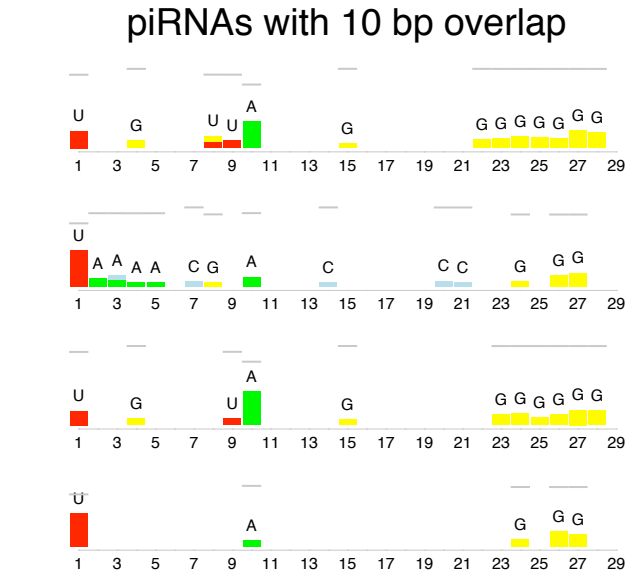**C**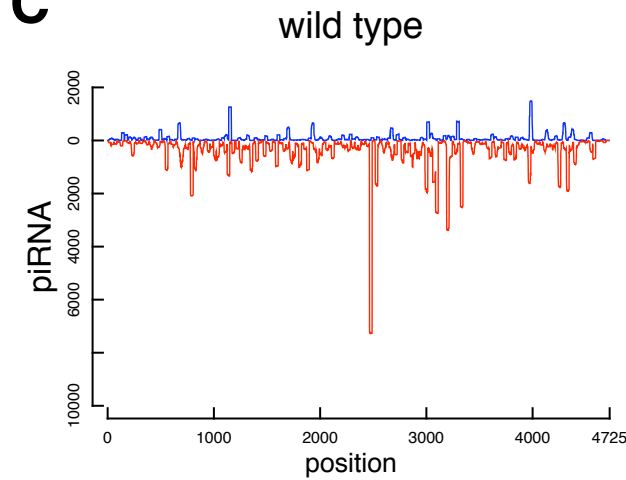**E**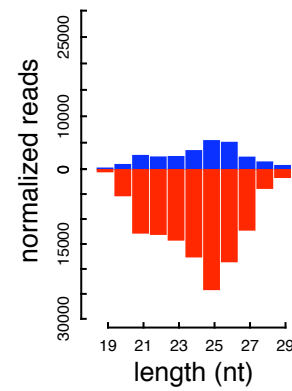**G**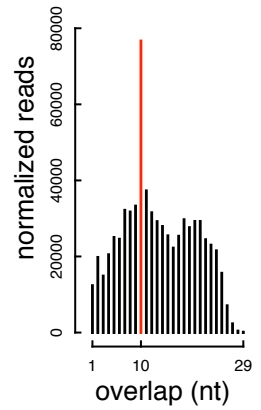**D**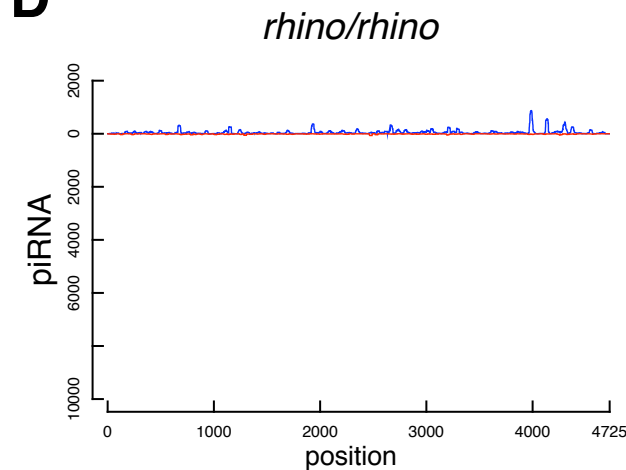**F**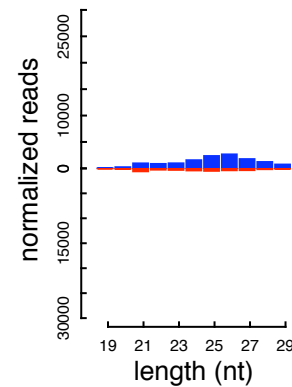**H**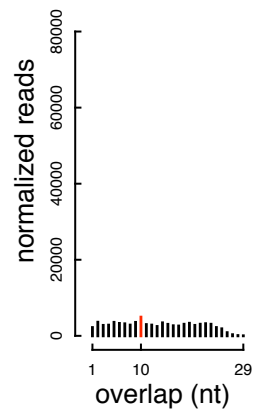

# Doc2 element

**A**

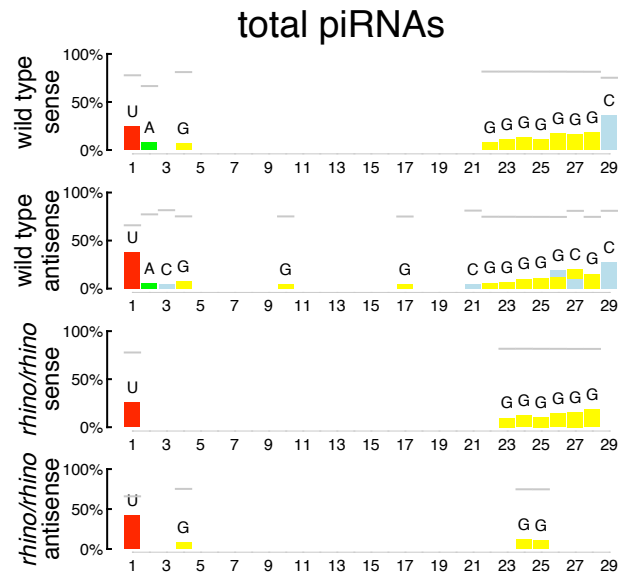

**B**

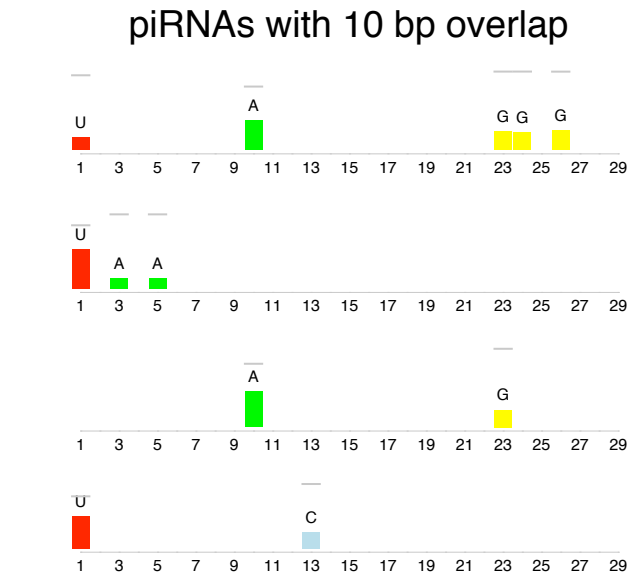

**C**

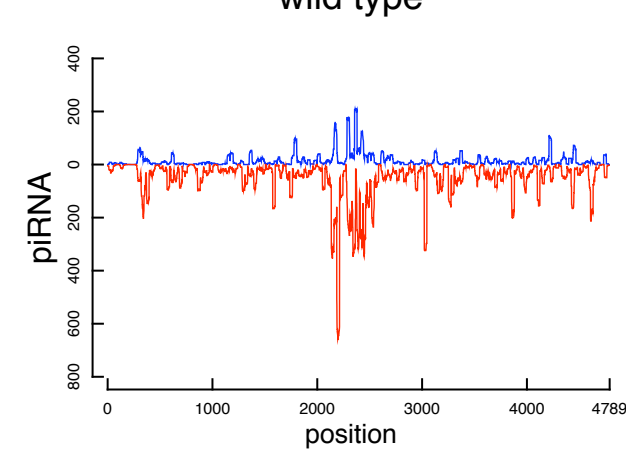

**E**

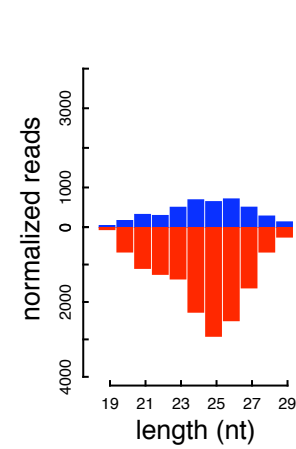

**G**

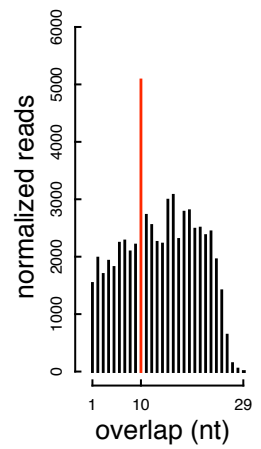

**D**

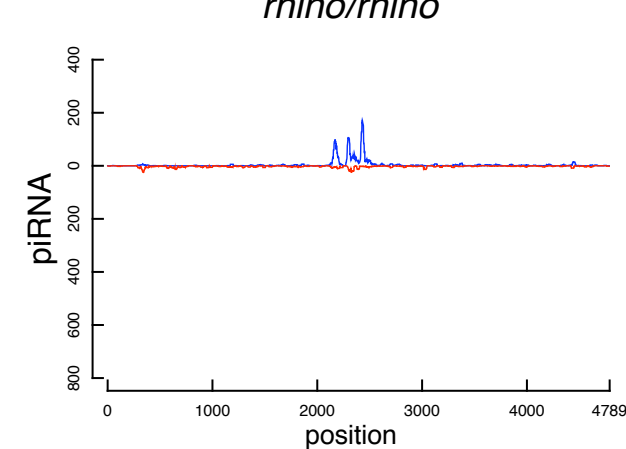

**F**

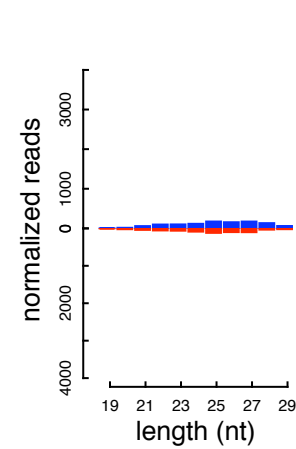

**H**

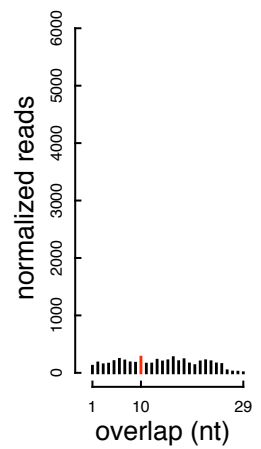

# Doc3 element

**A**

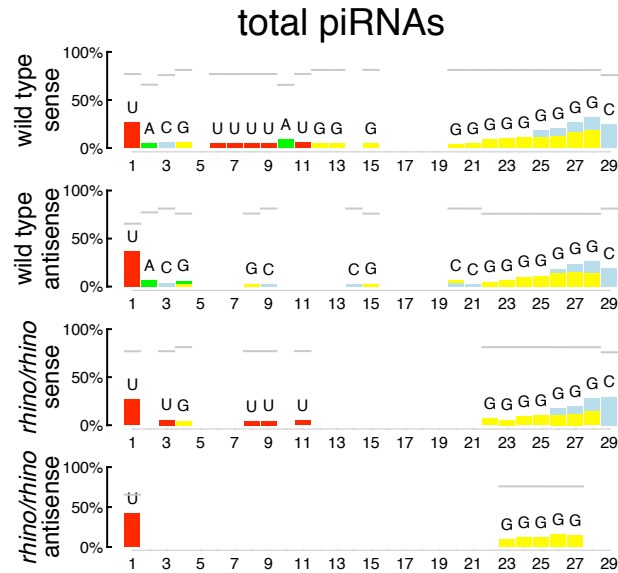

**B**

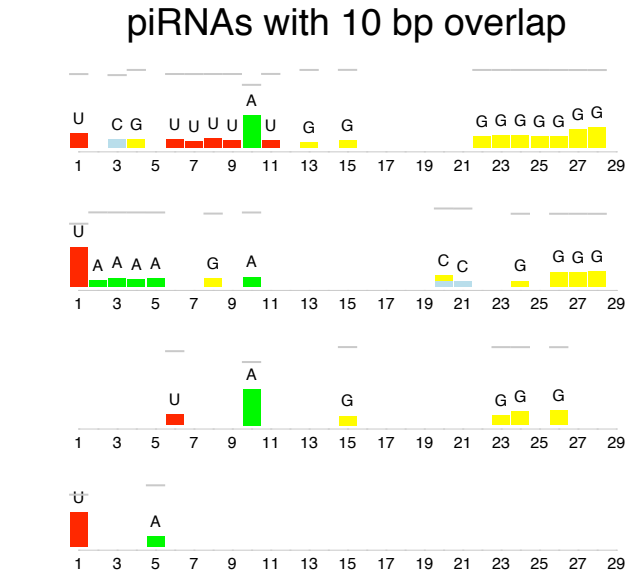

**C**

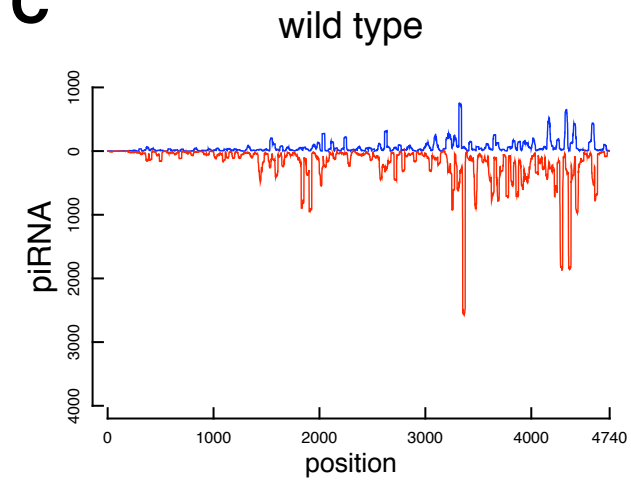

**E**

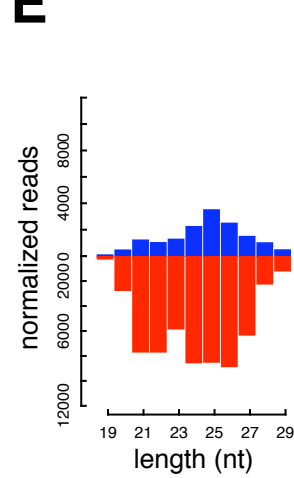

**G**

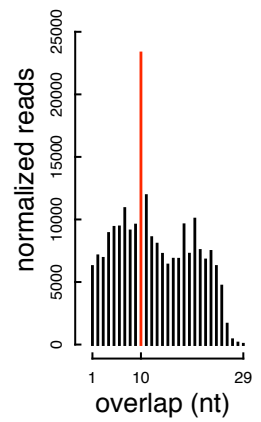

**D**

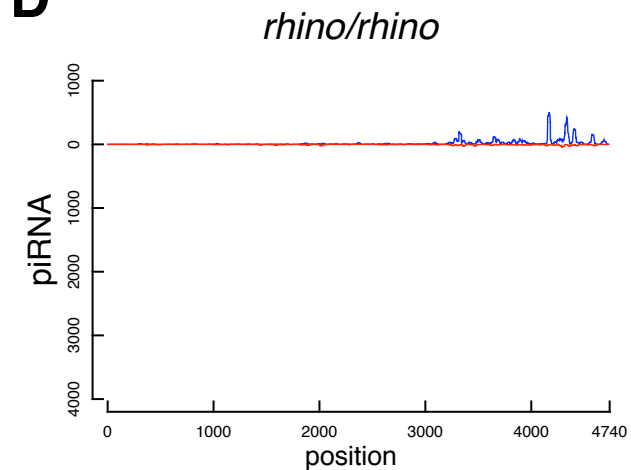

**F**

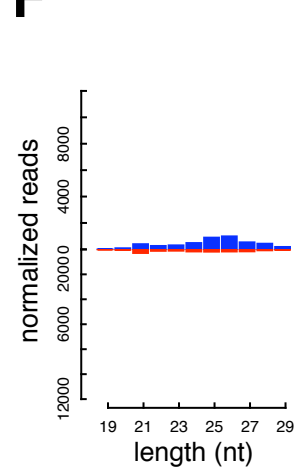

**H**

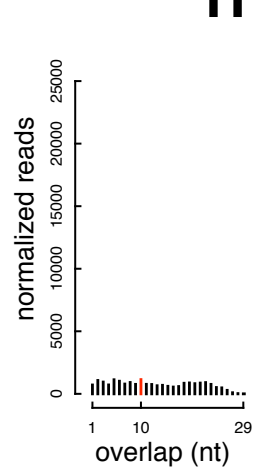



# F element

**A**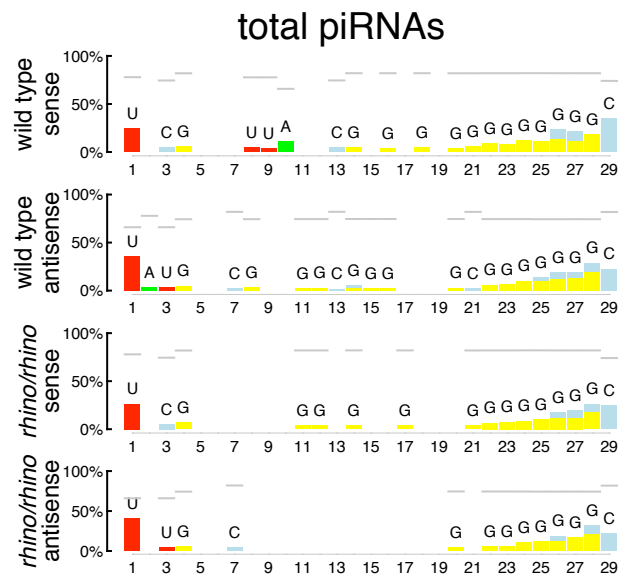**B**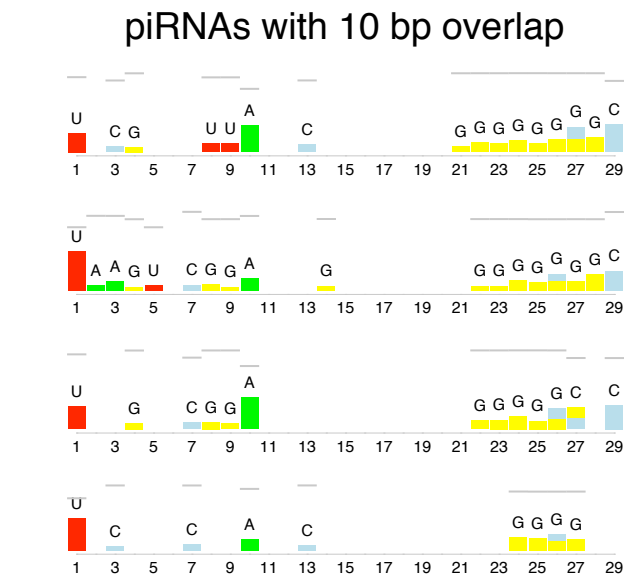**C**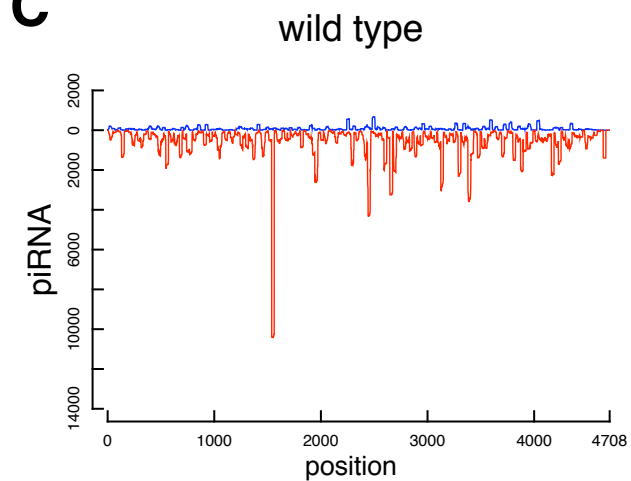**E**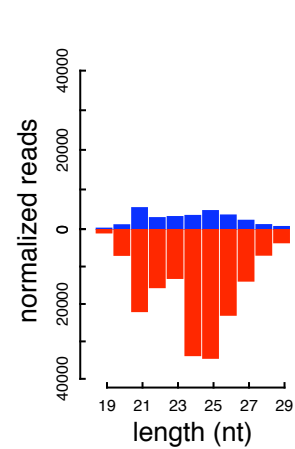**G**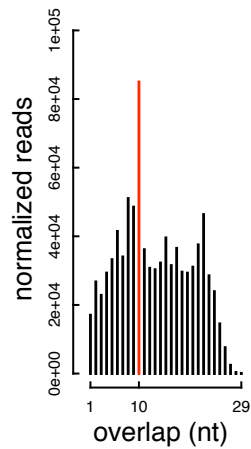**D**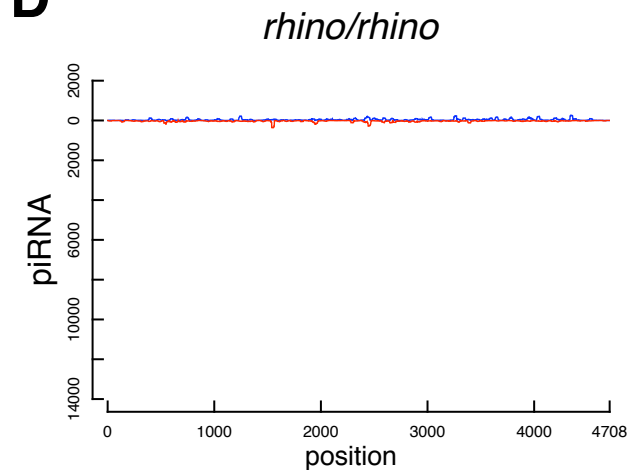**F**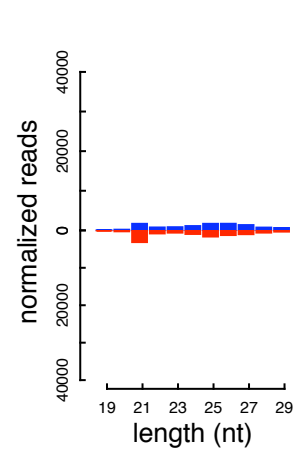**H**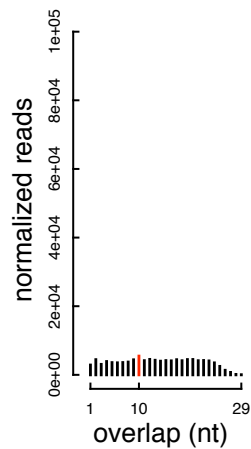

# flea

**A**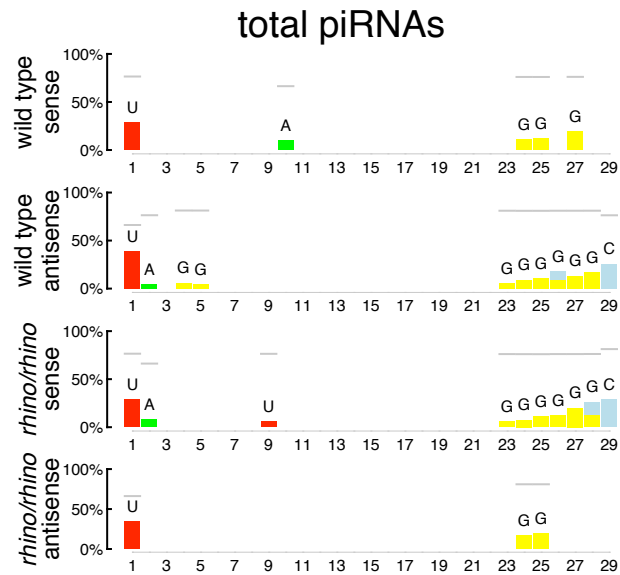**B**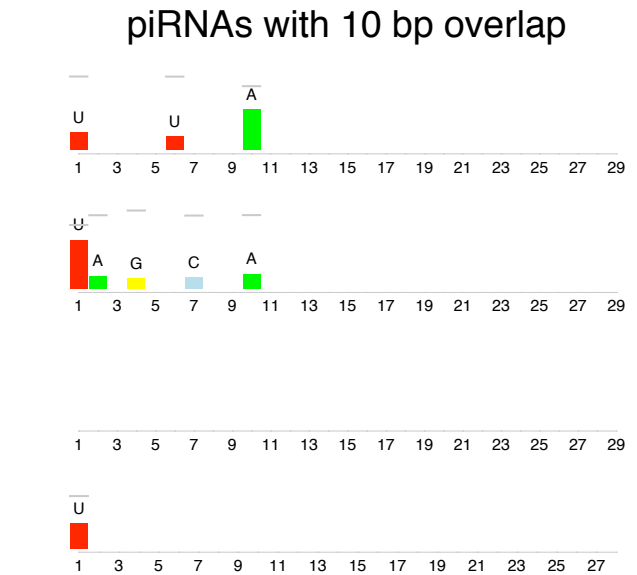**C**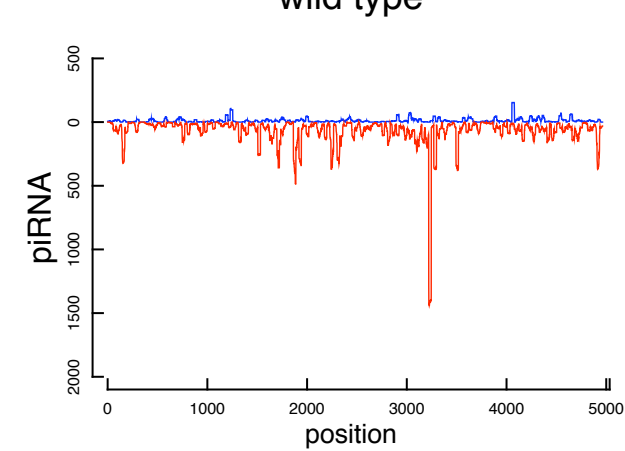**E**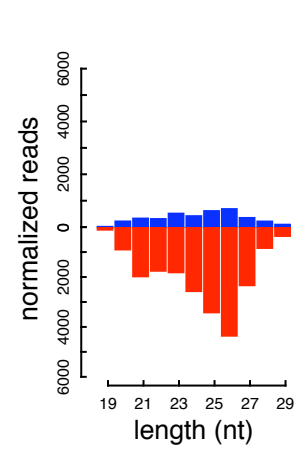**G**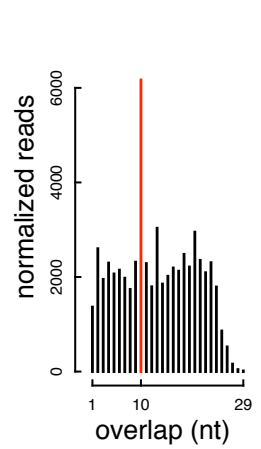**D**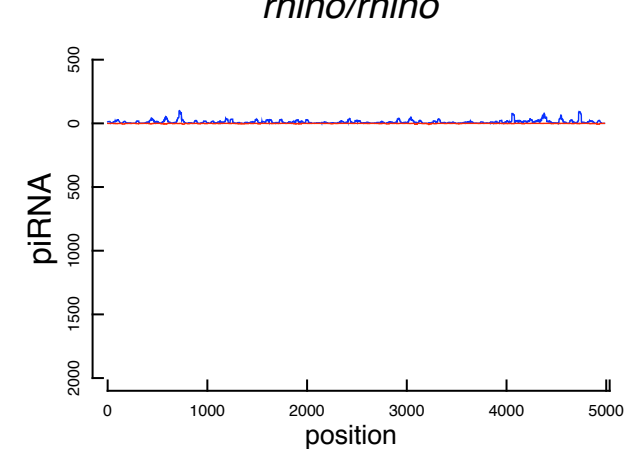**F**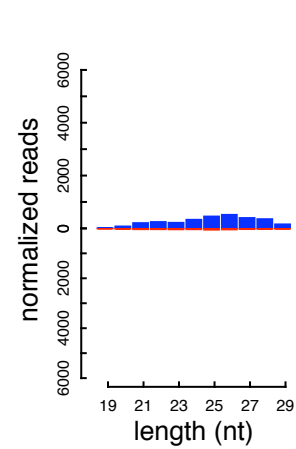**H**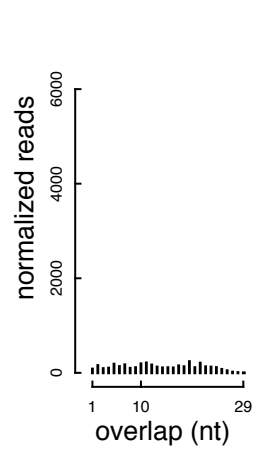

# Fw2

**A**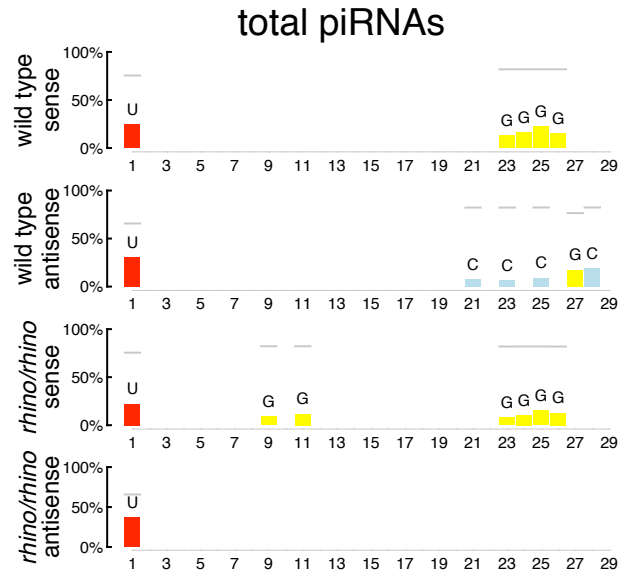**B**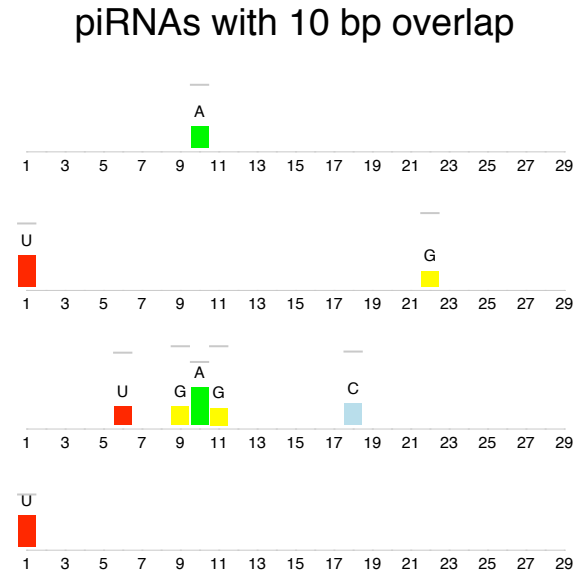**C**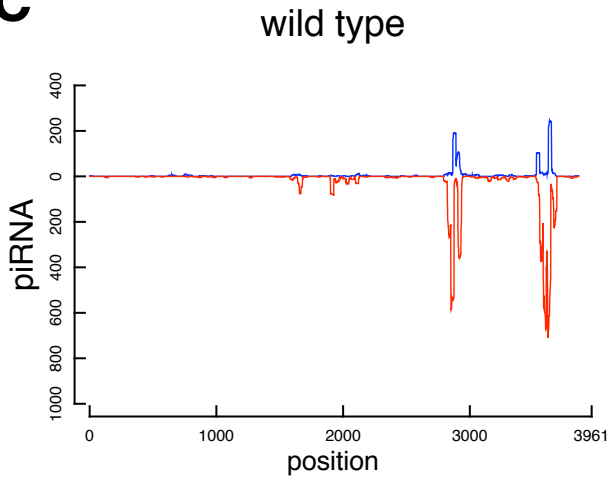**E**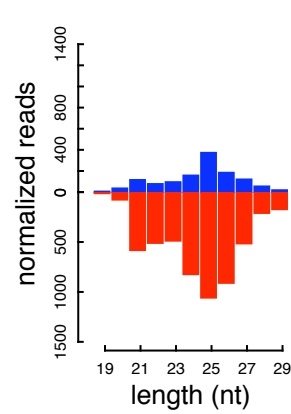**G**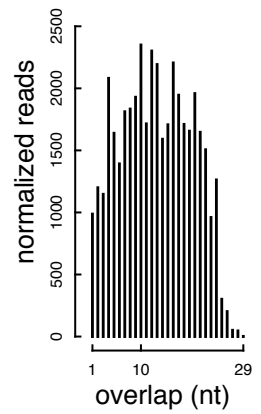**D**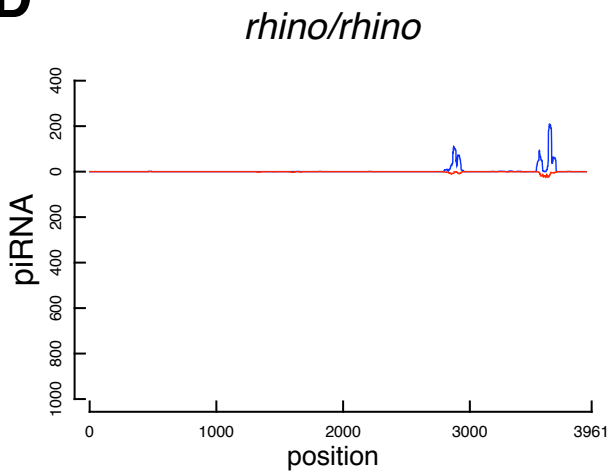**F**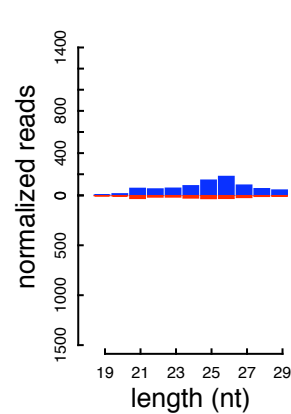**H**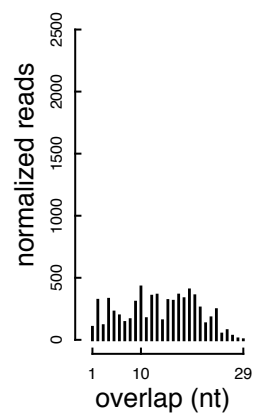

# G2

**A**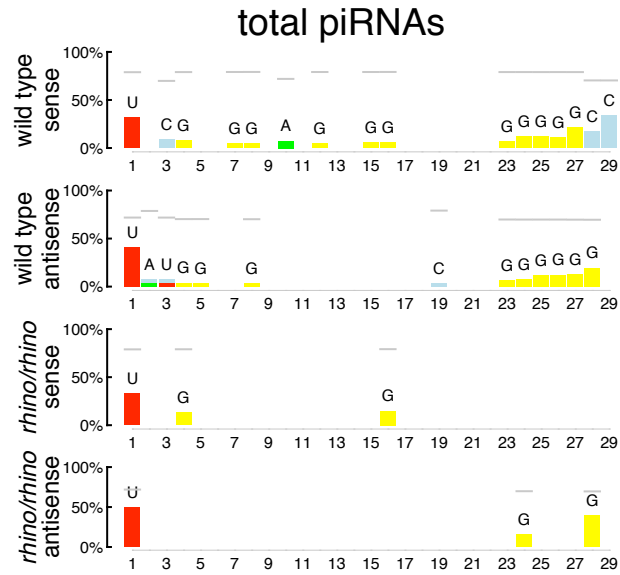**B**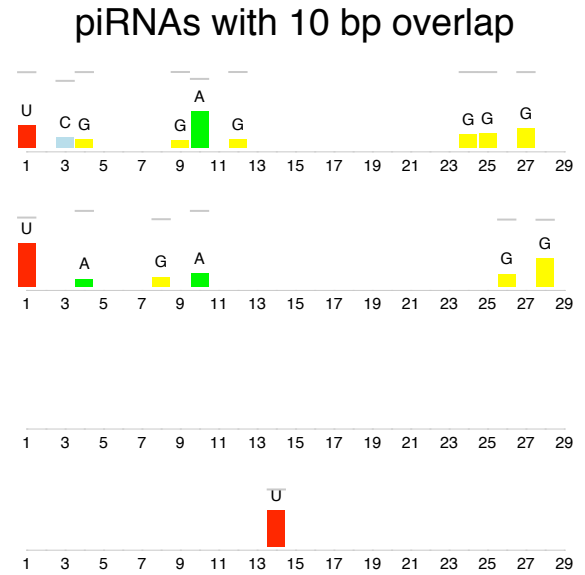**C**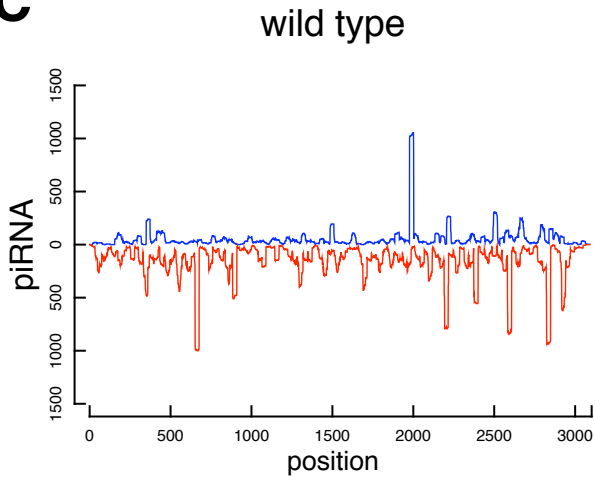**E**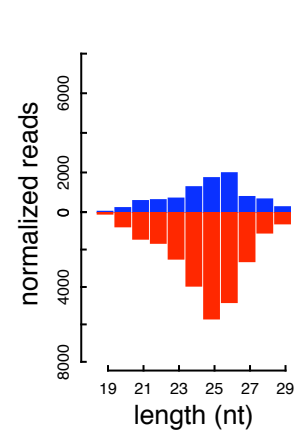**G**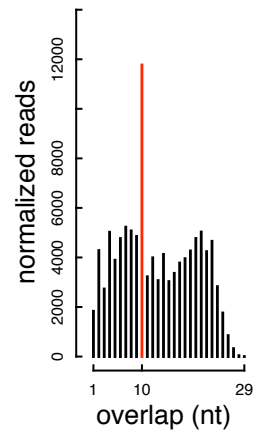**D**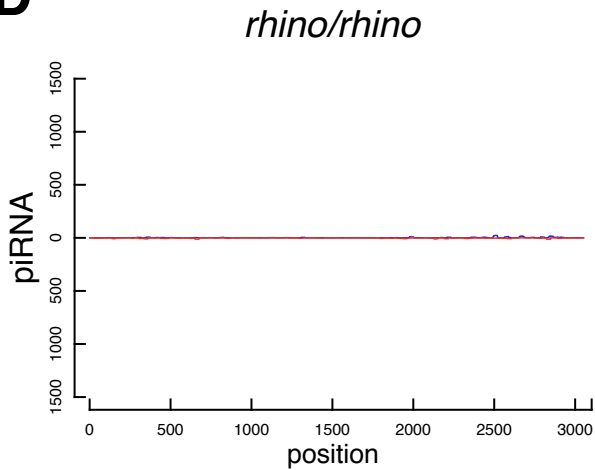**F**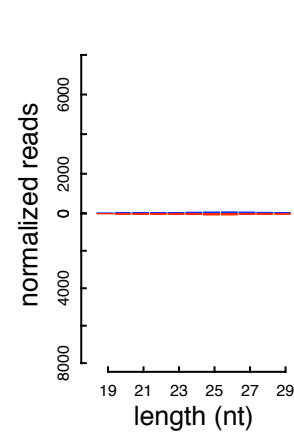**H**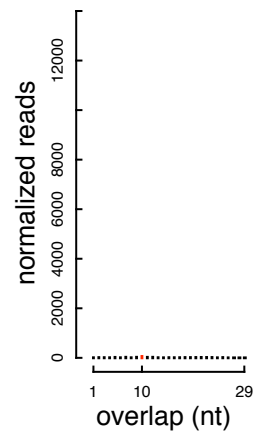

# G4

**A**

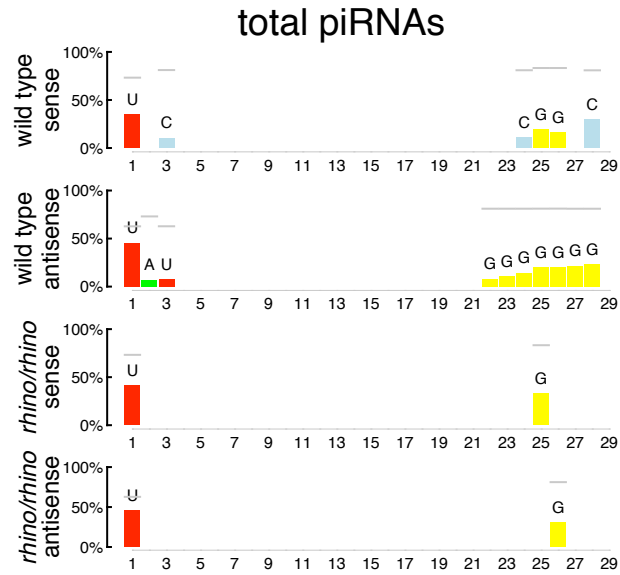

**B**

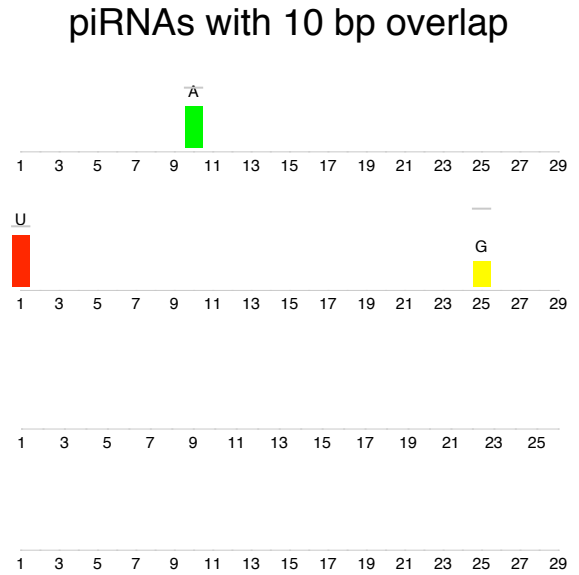

**C**

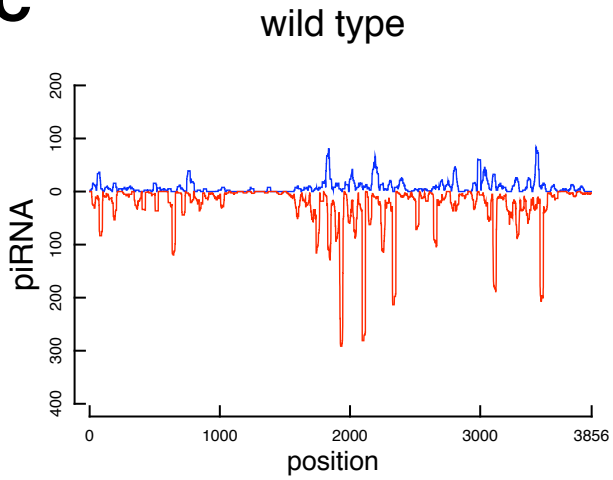

**E**

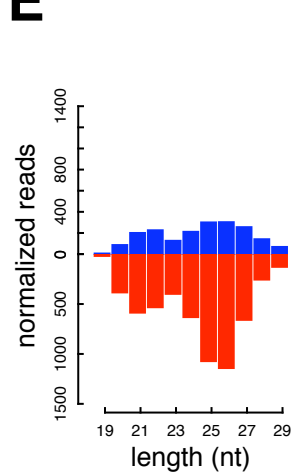

**G**

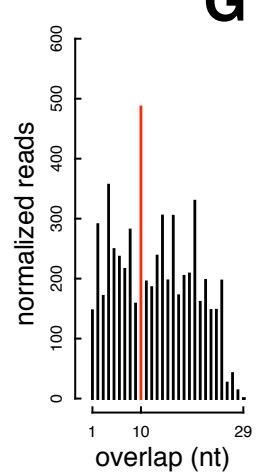

**D**

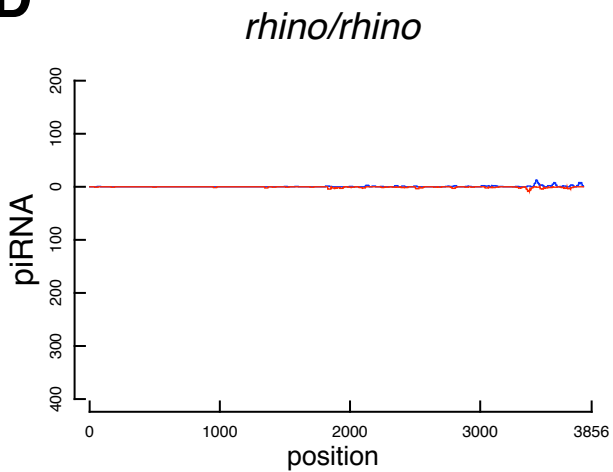

**F**

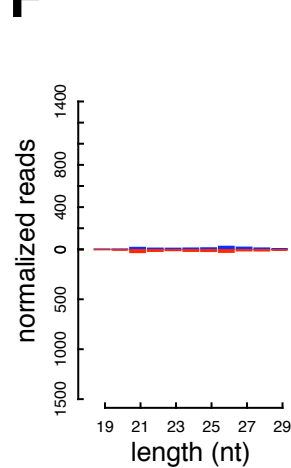

**H**

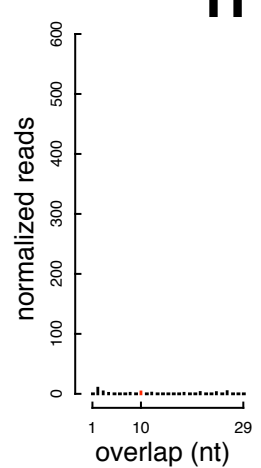

# G5

**A**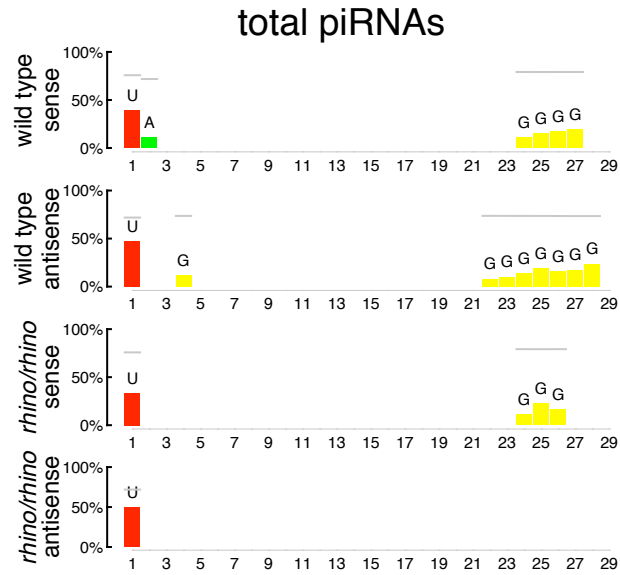**B**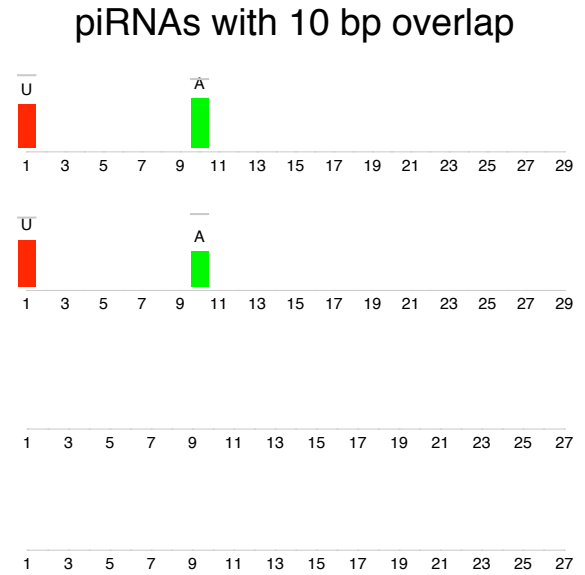**C**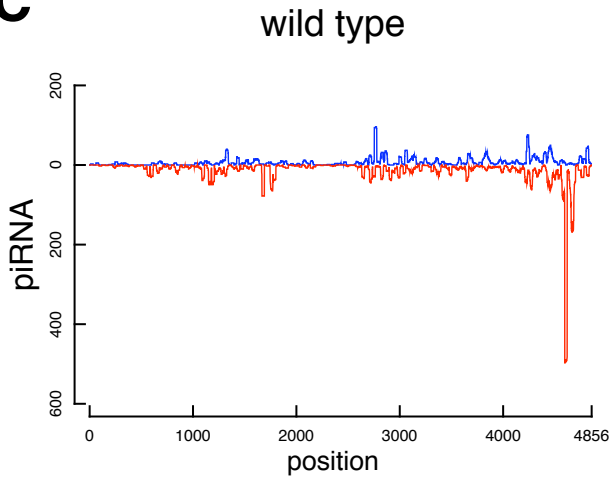**E**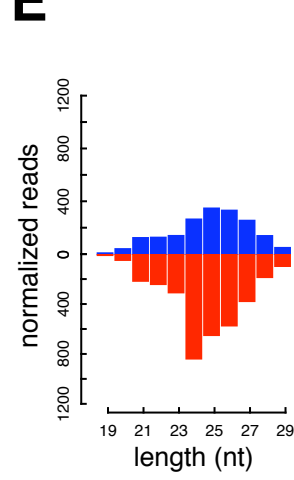**G**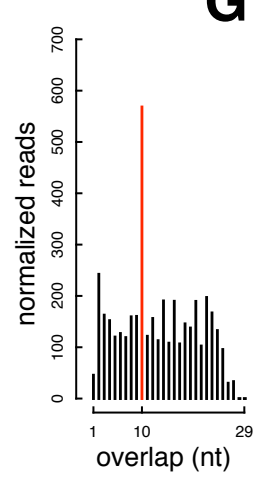**D**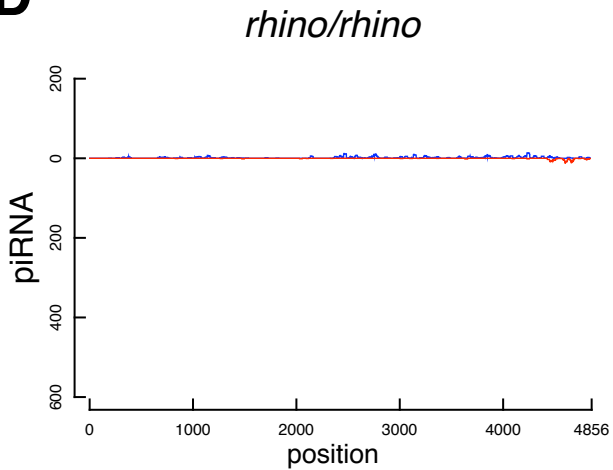**F**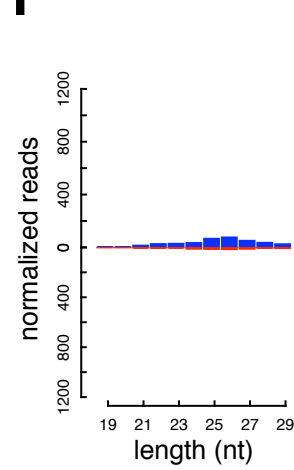**H**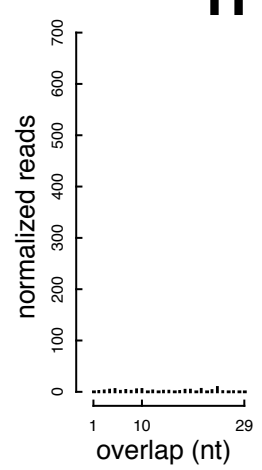

# G5A

**A**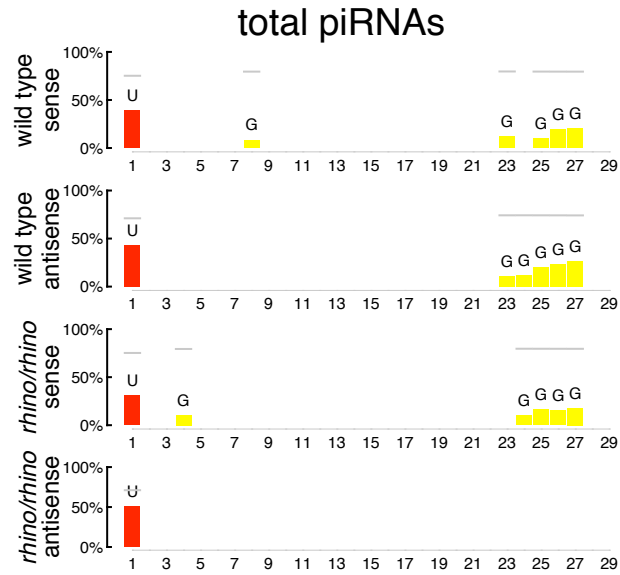**B**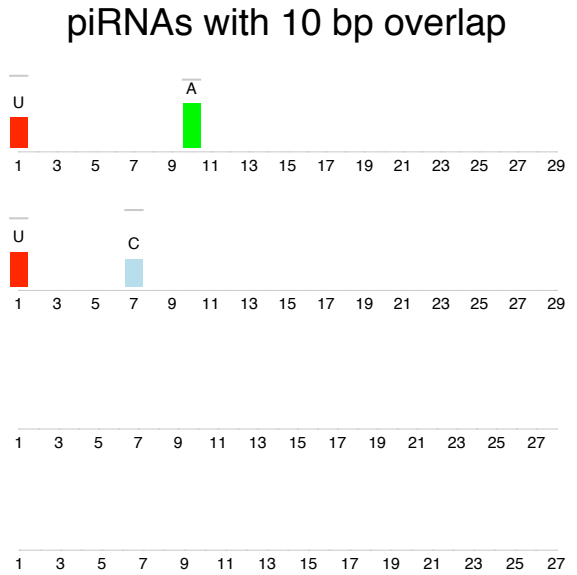**C**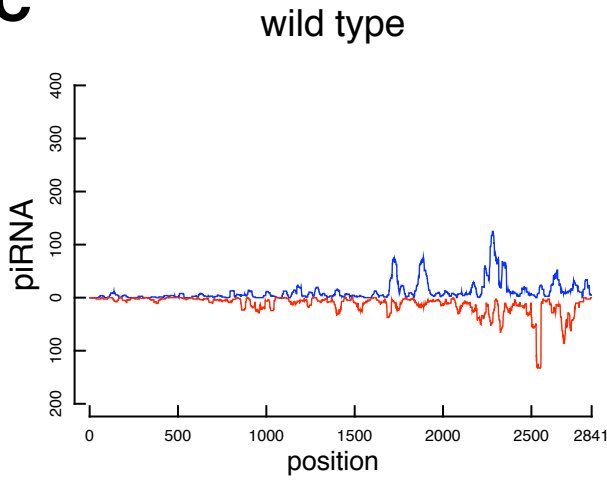**E**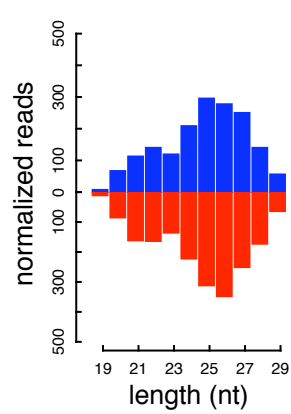**G**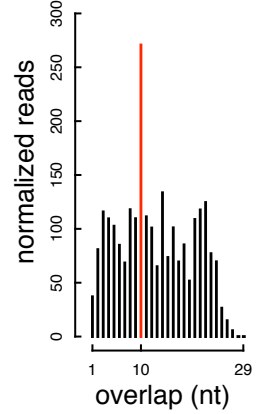**D**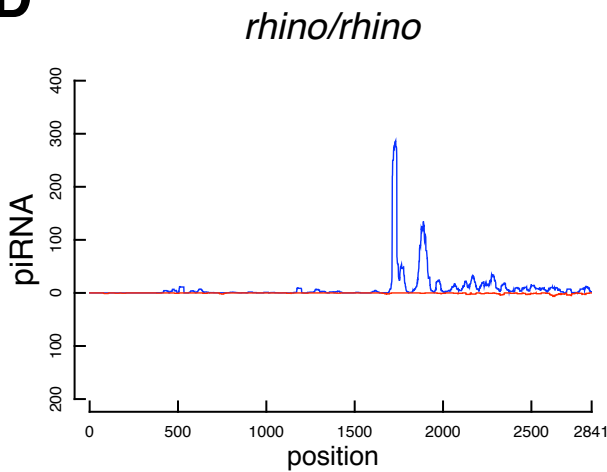**F**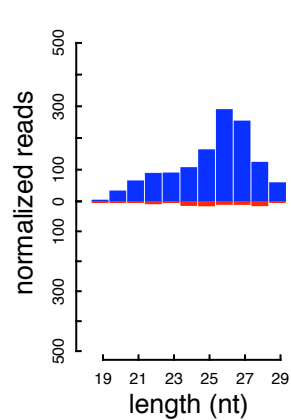**H**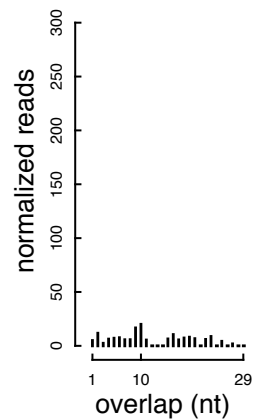

# G6

## A

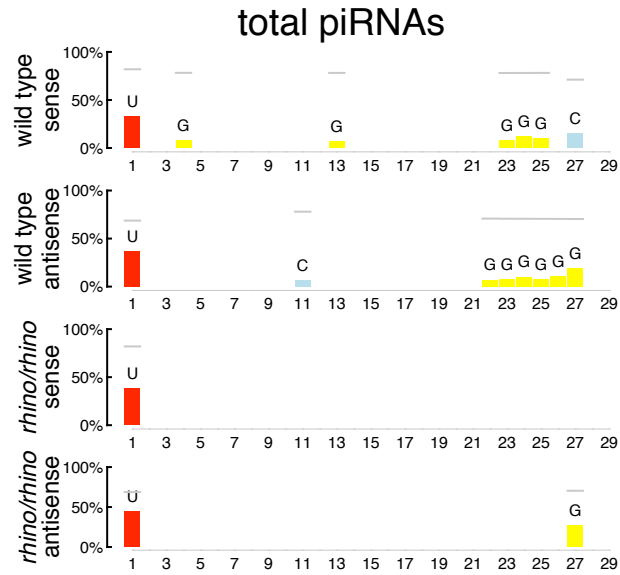

## B

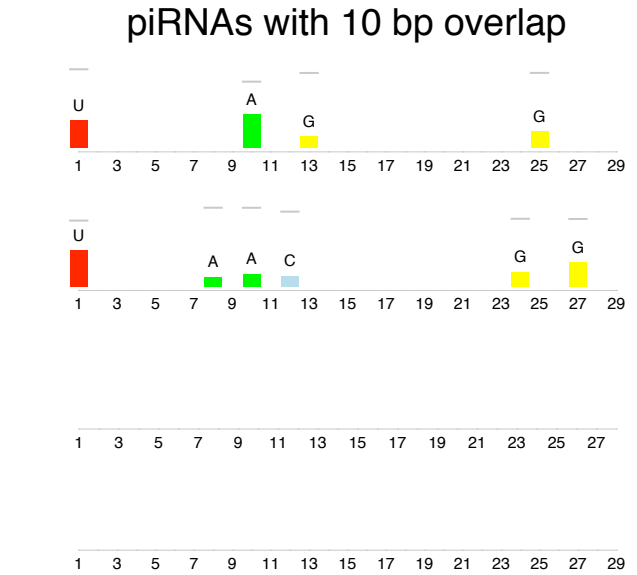

## C

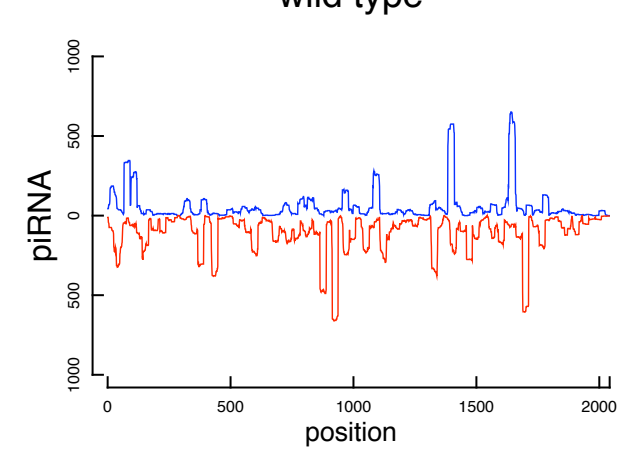

## E

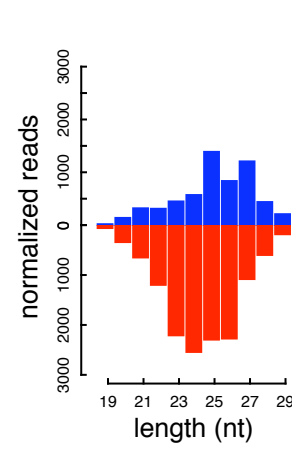

## G

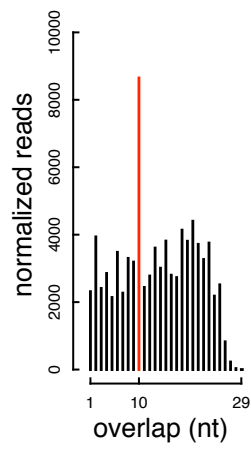

## D

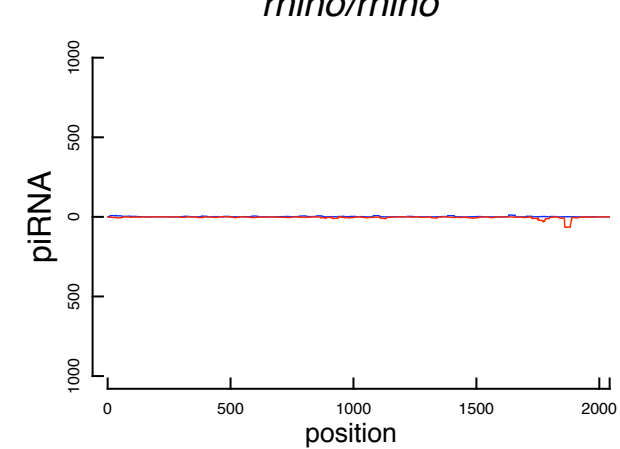

## F

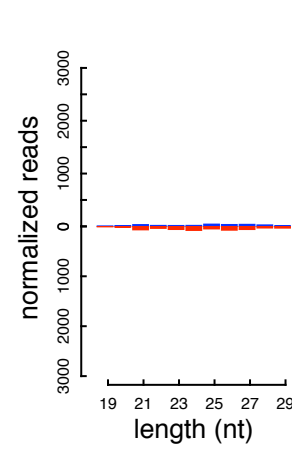

## H

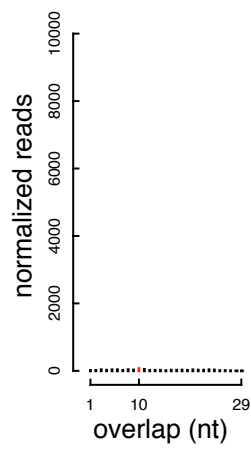



# GATE

**A**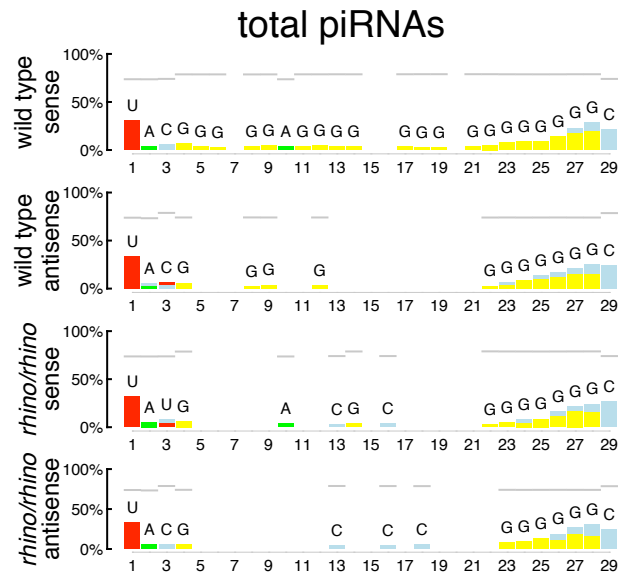**B**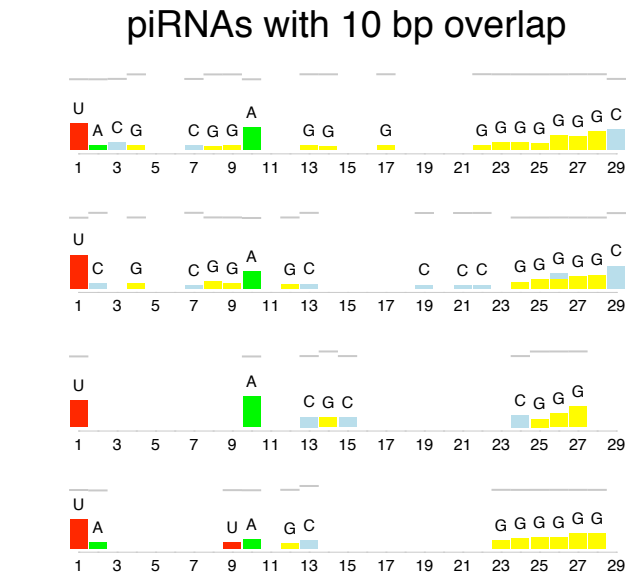**C**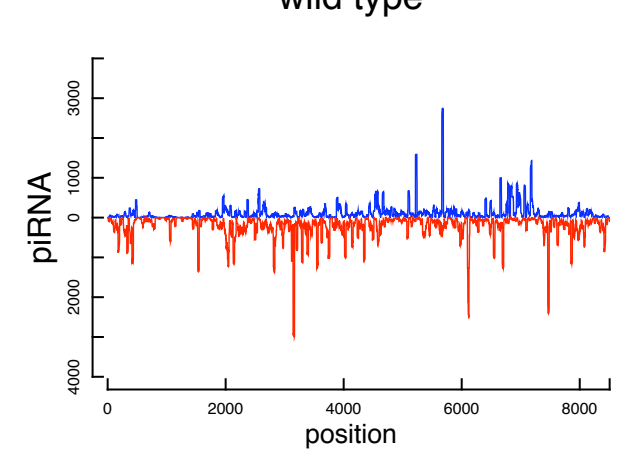**E**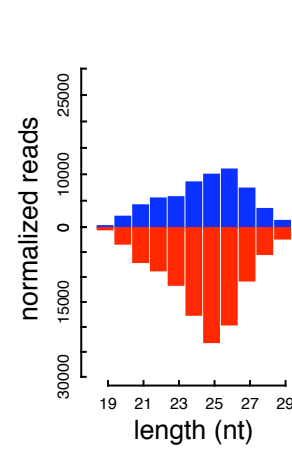**G**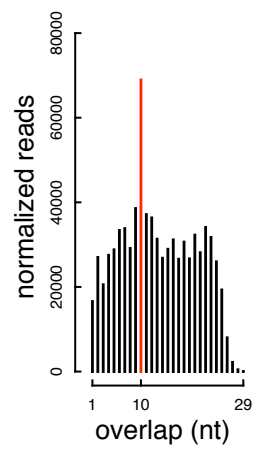**D**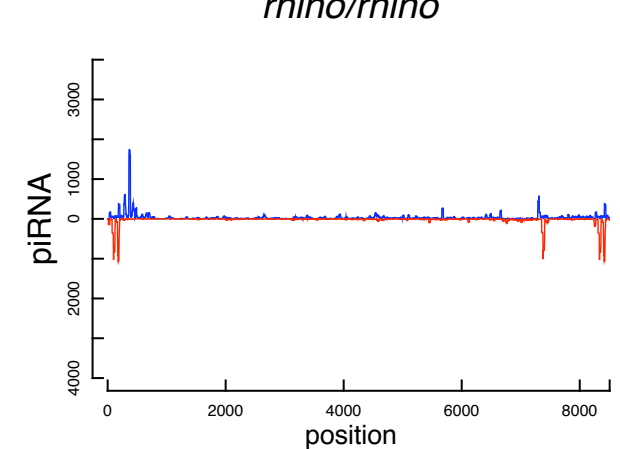**F**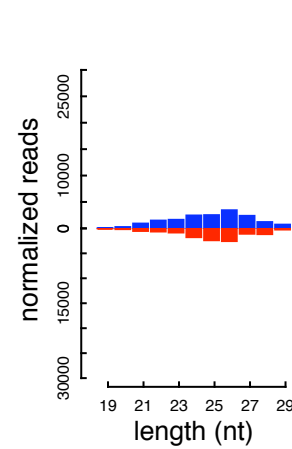**H**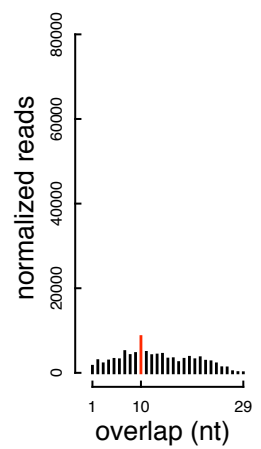

# *G element*

**A**

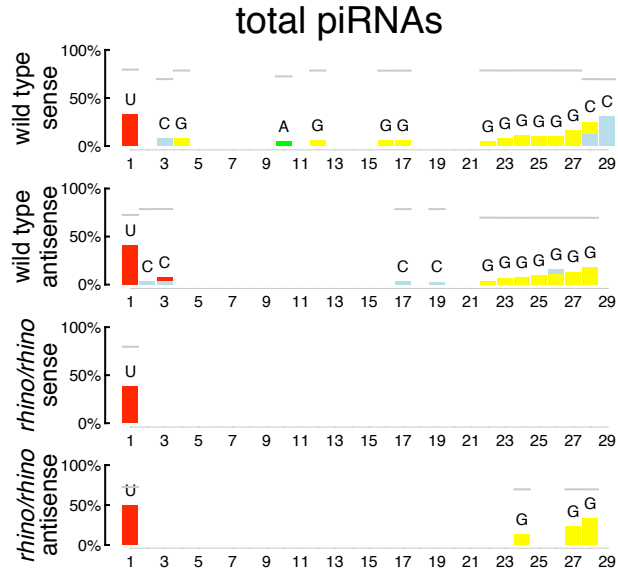

**B**

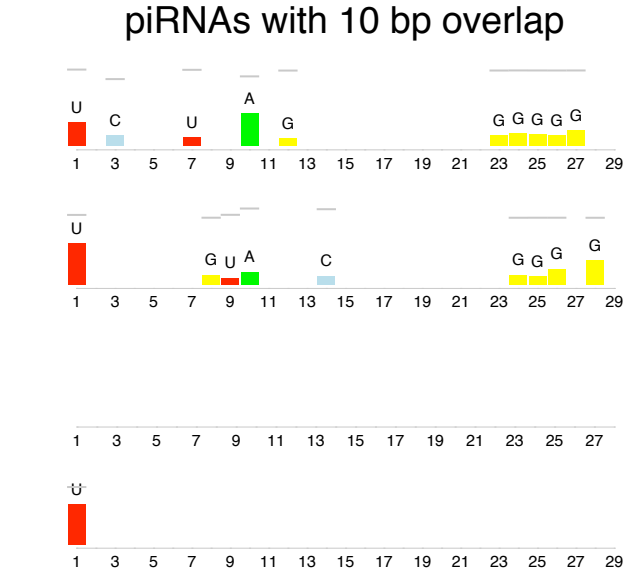

**C**

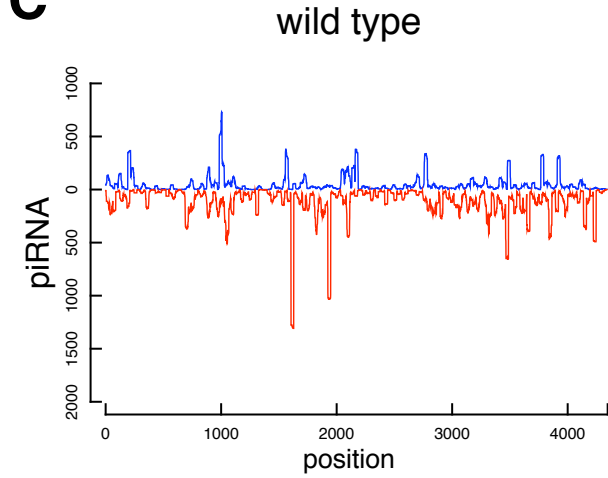

**E**

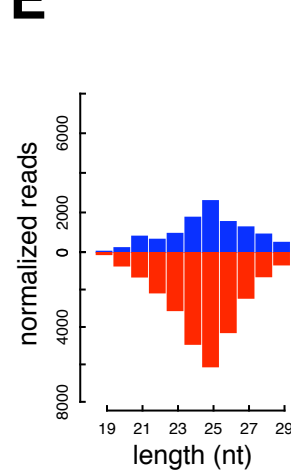

**G**

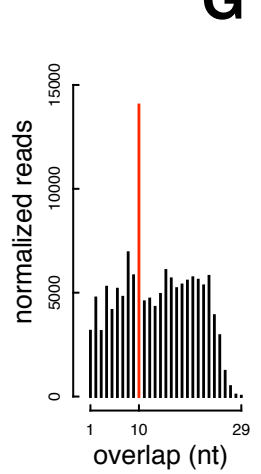

**D**

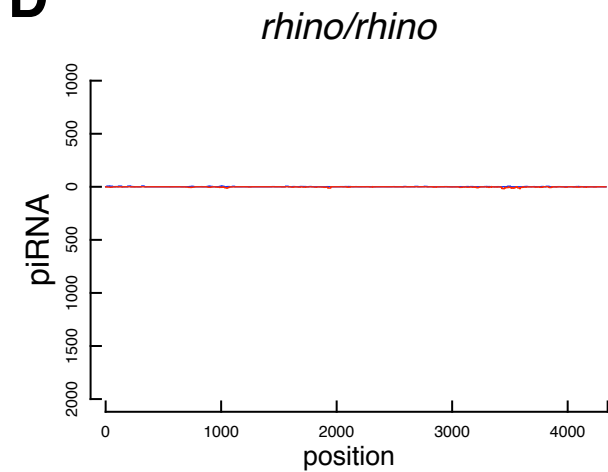

**F**

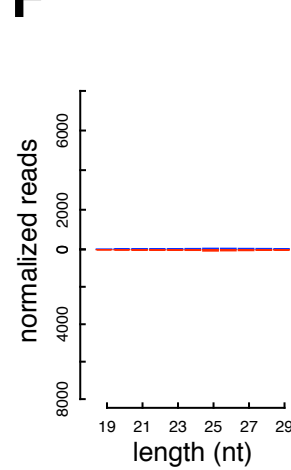

**H**

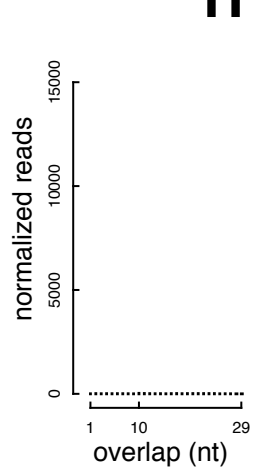

# gtwin

**A**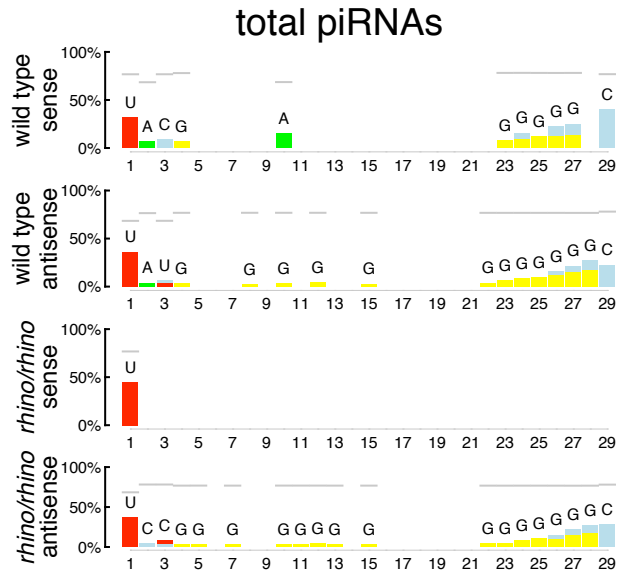**B**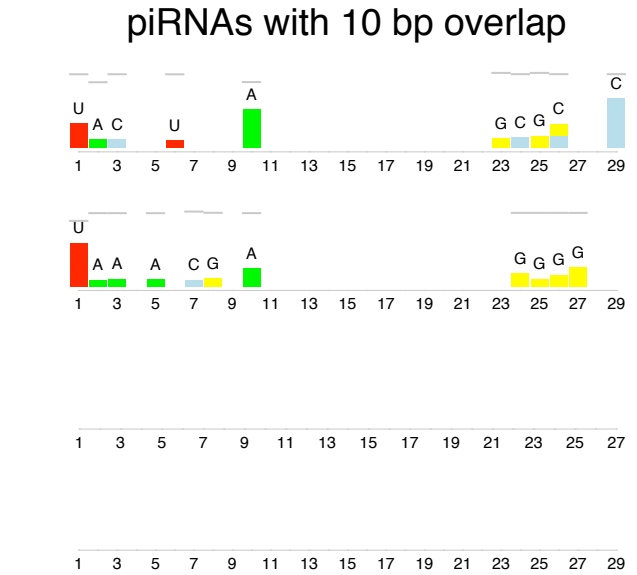**C**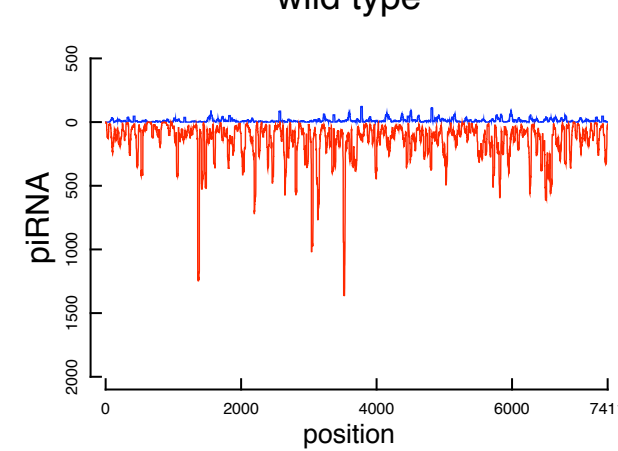**E**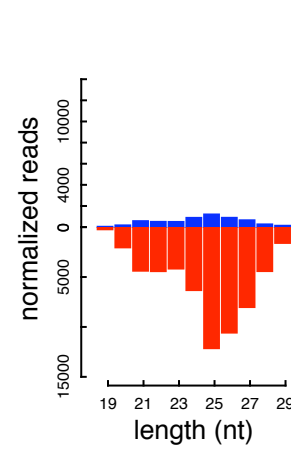**G**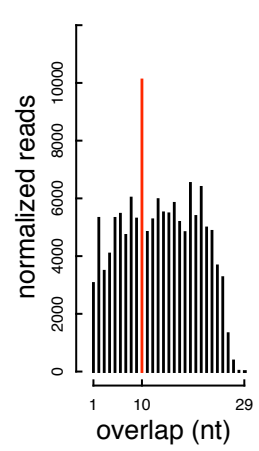**D**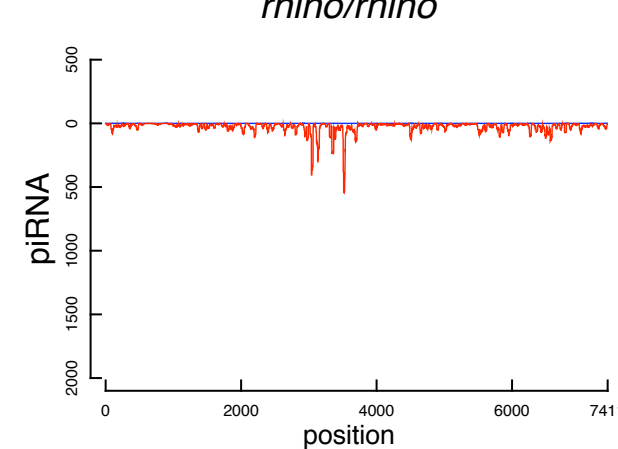**F**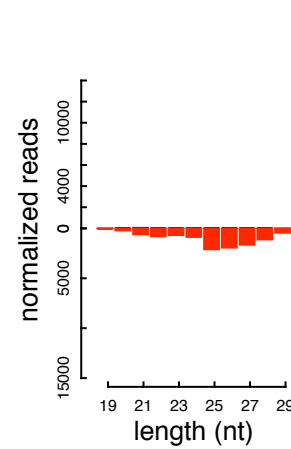**H**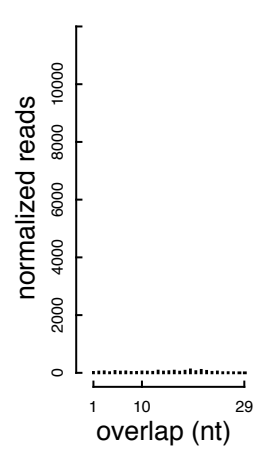

# *gypsy*

**A**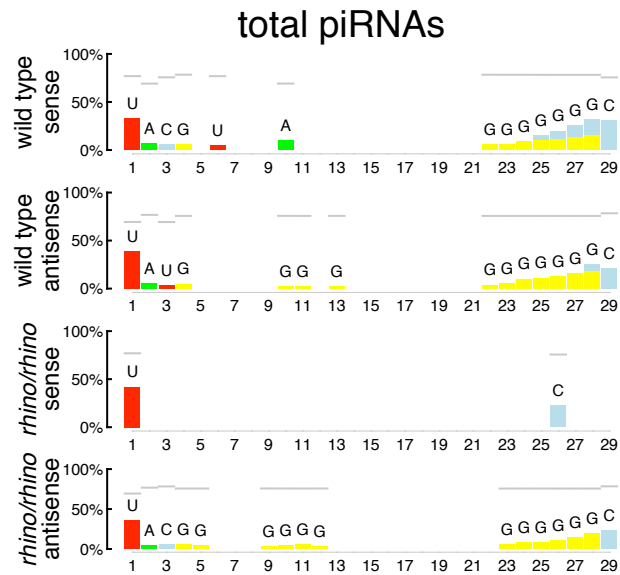**B**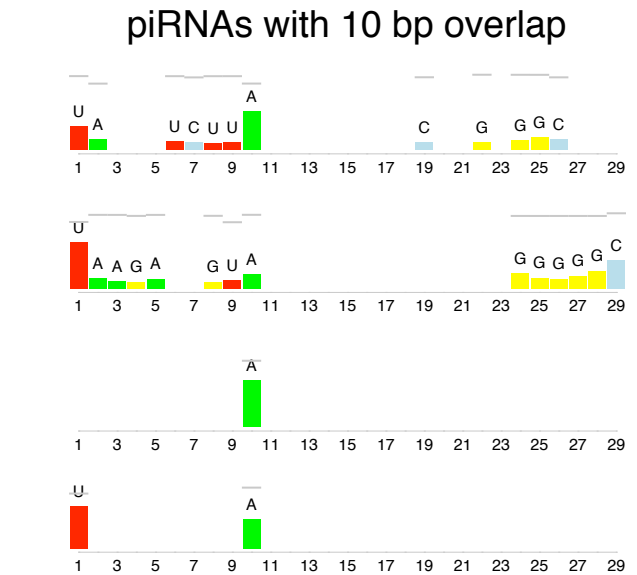**C**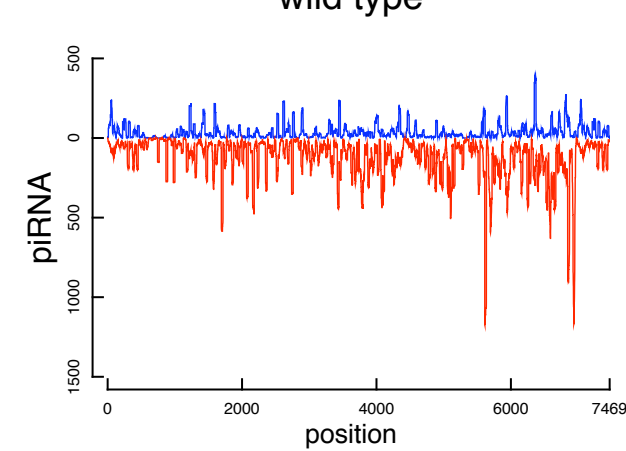**E**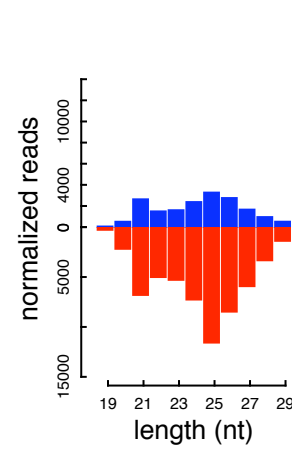**G**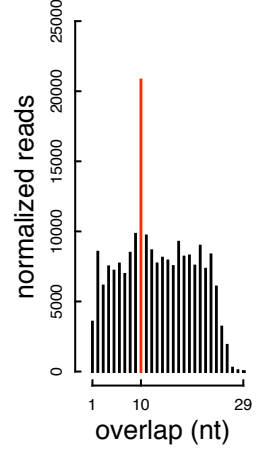**D**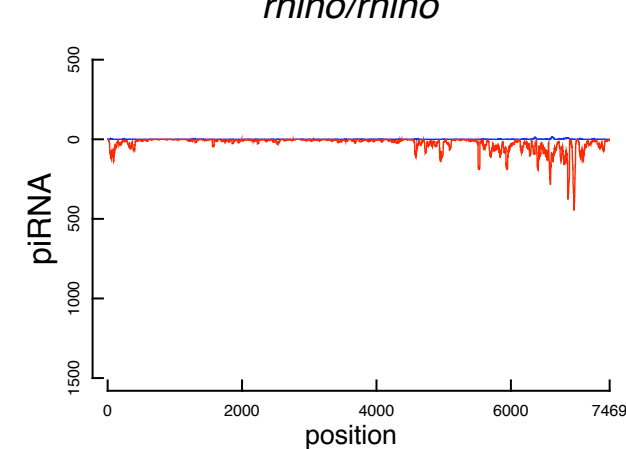**F**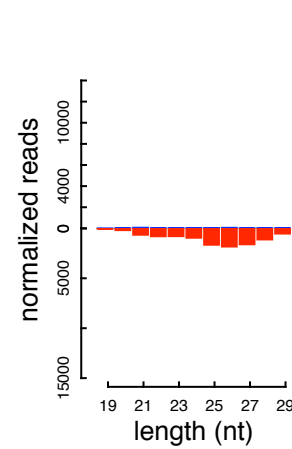**H**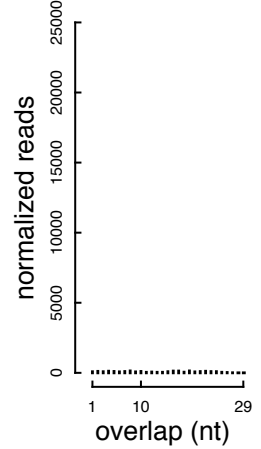

# *gypsy10*

**A**

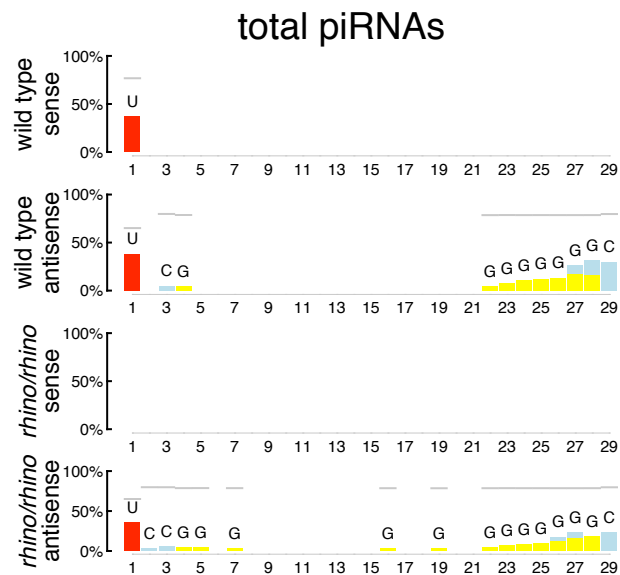

**B**

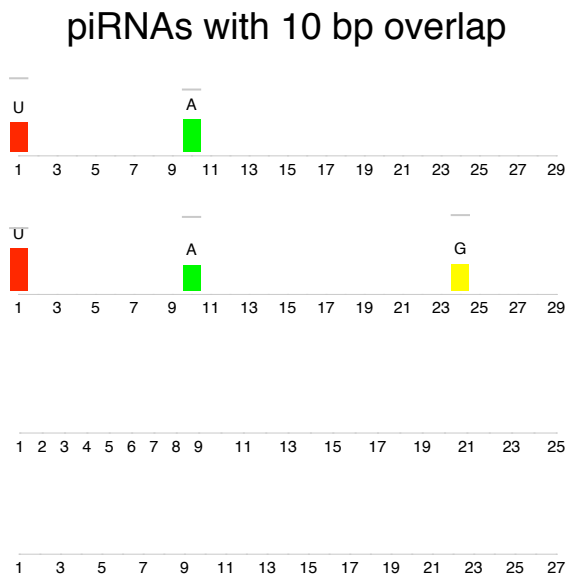

**C**

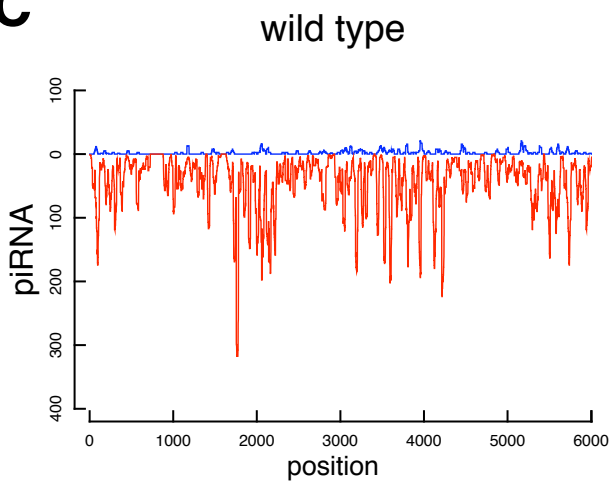

**E**

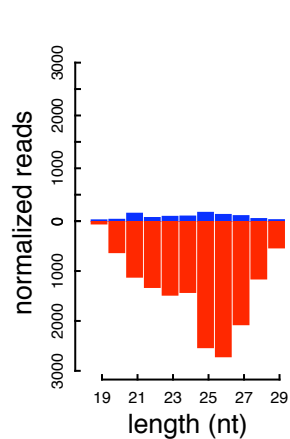

**G**

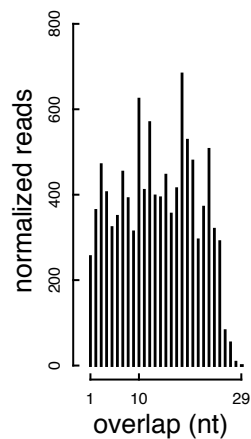

**D**

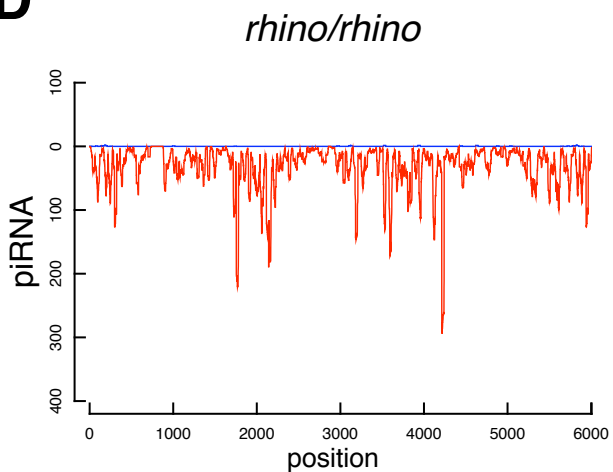

**F**

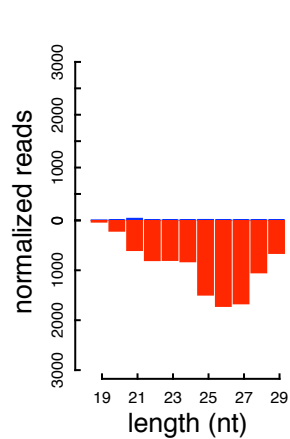

**H**

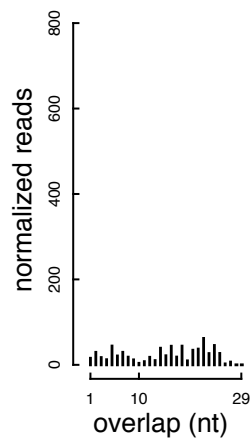

# *gypsy11*

**A**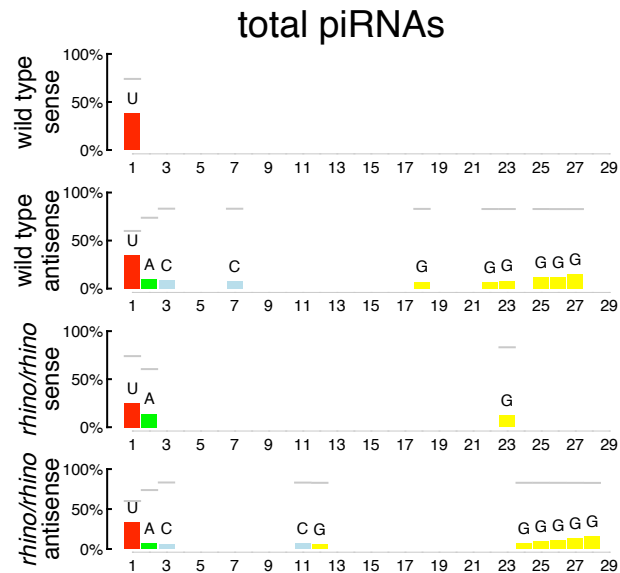**B**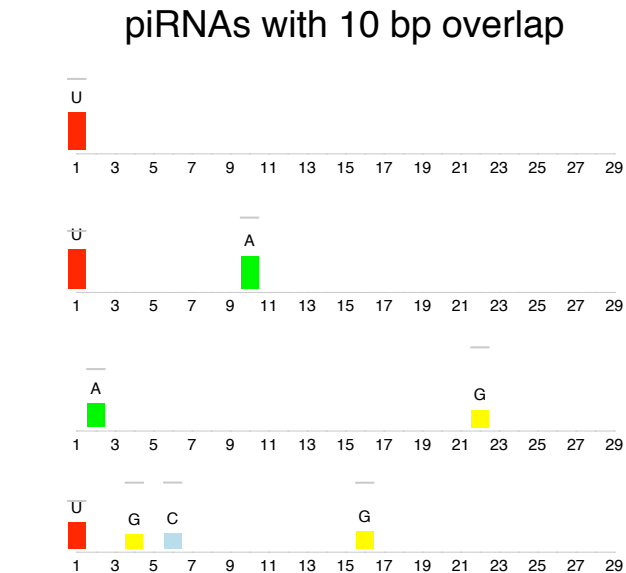**C**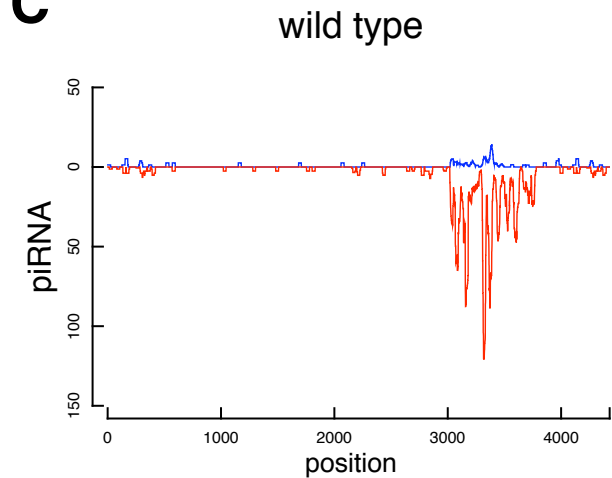**E**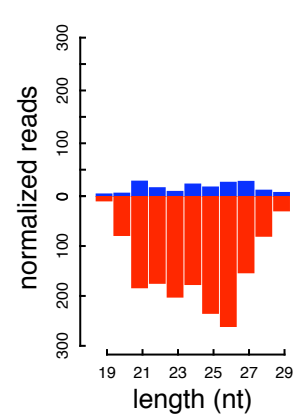**G**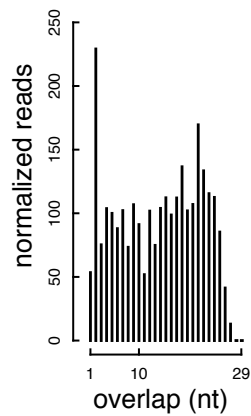**D**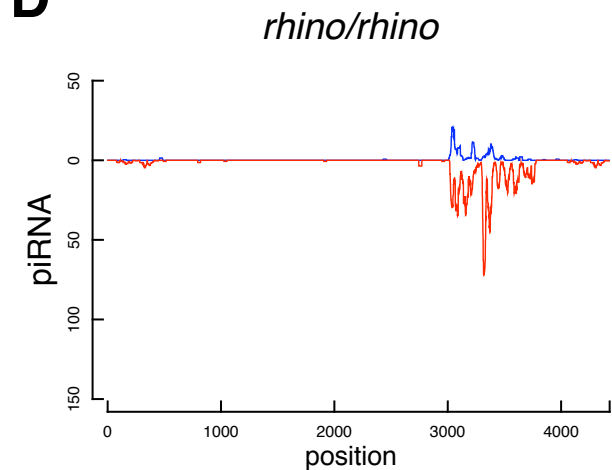**F**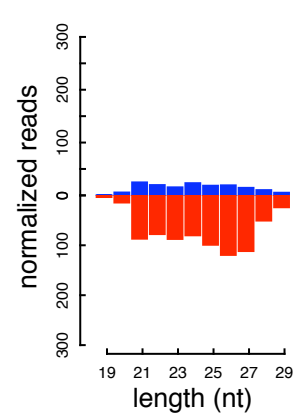**H**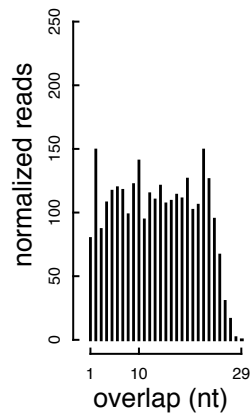

# *gypsy12*

**A**

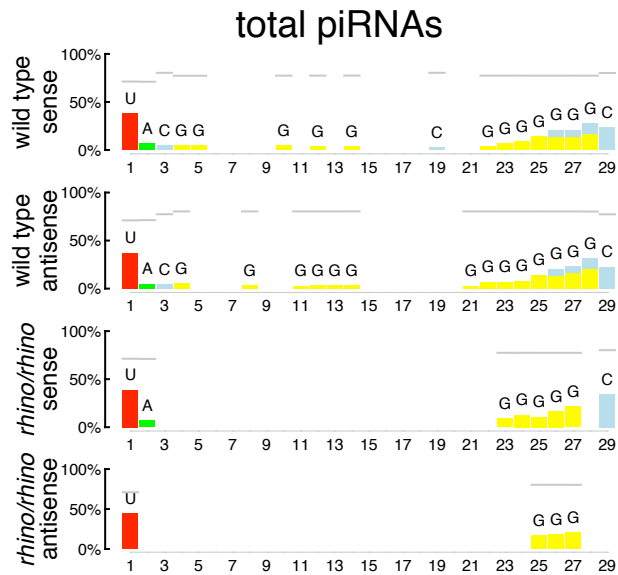

**B**

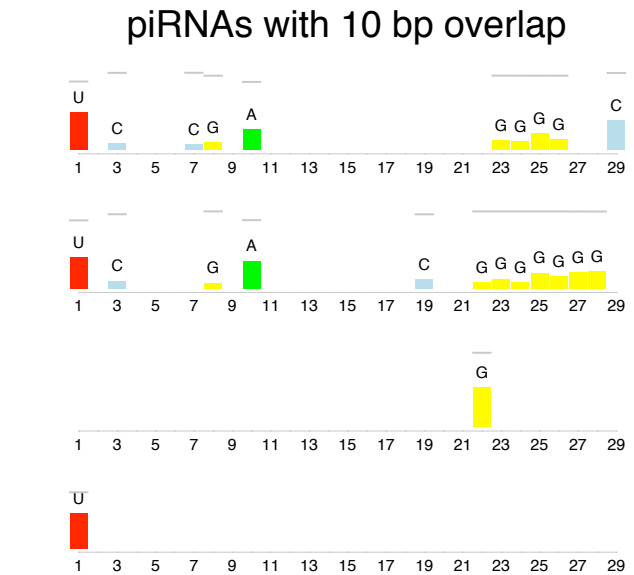

**C**

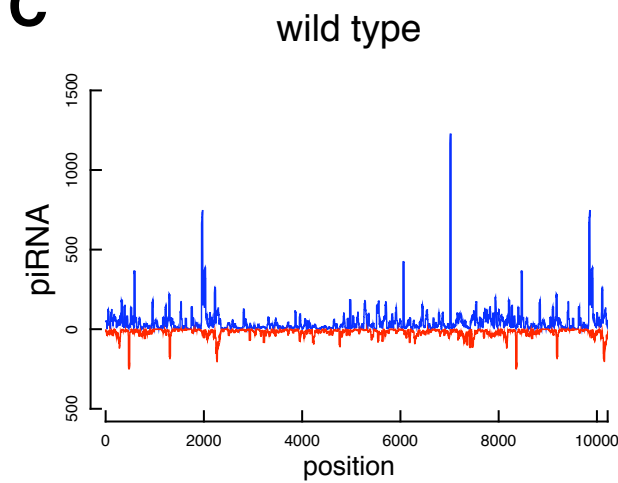

**E**

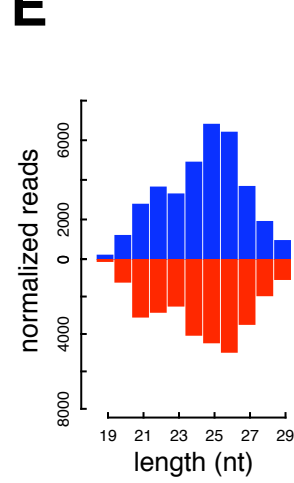

**G**

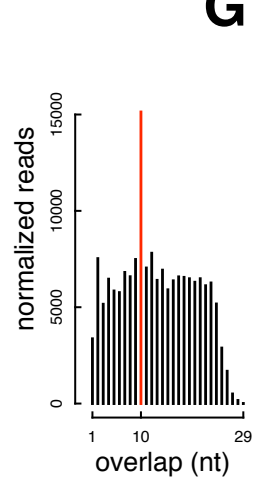

**D**

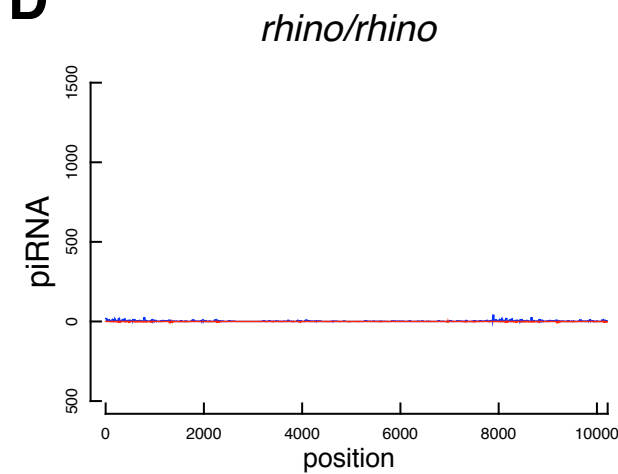

**F**

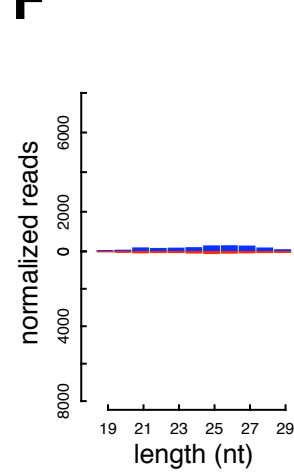

**H**

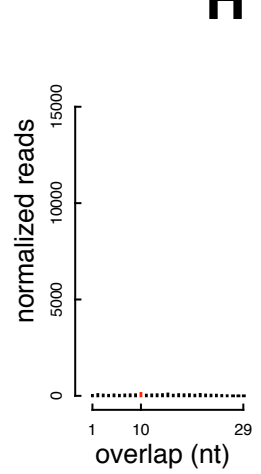

# *gypsy2*

**A**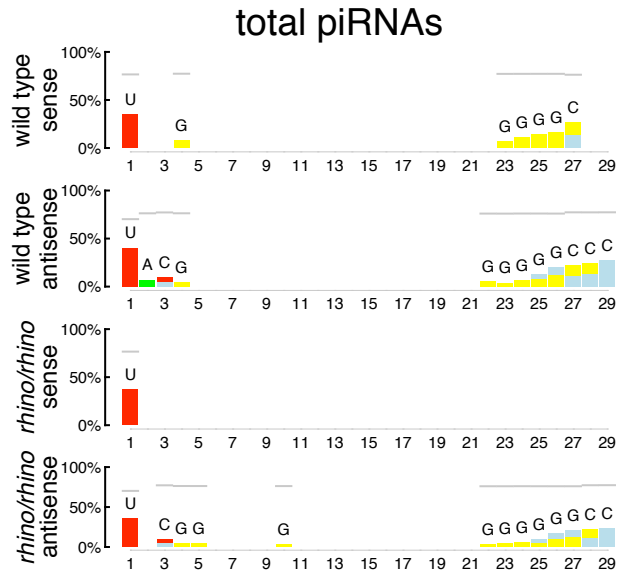**B**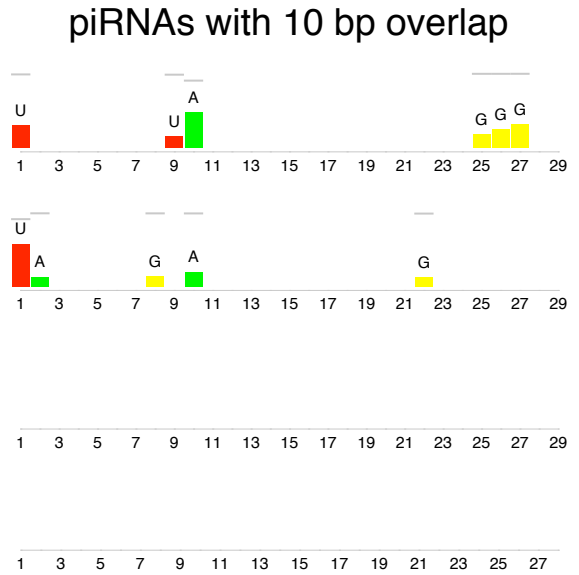**C**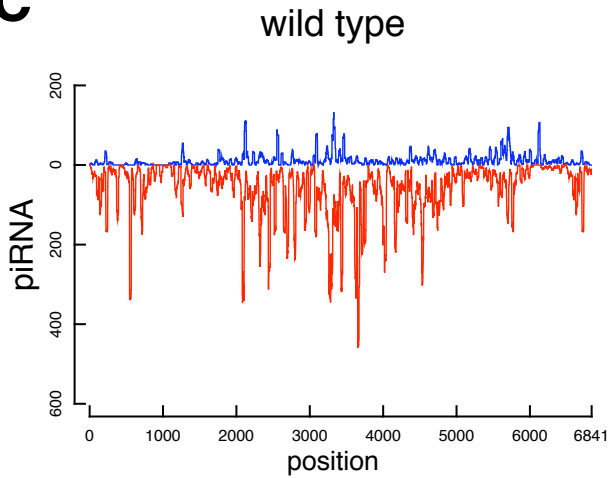**E**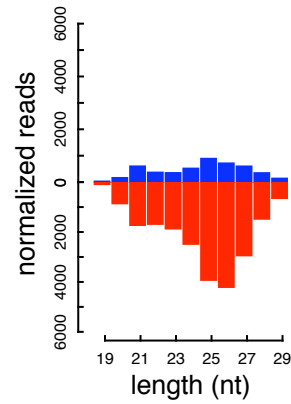**G**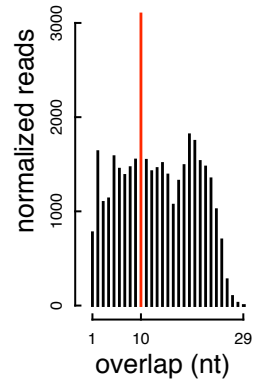**D**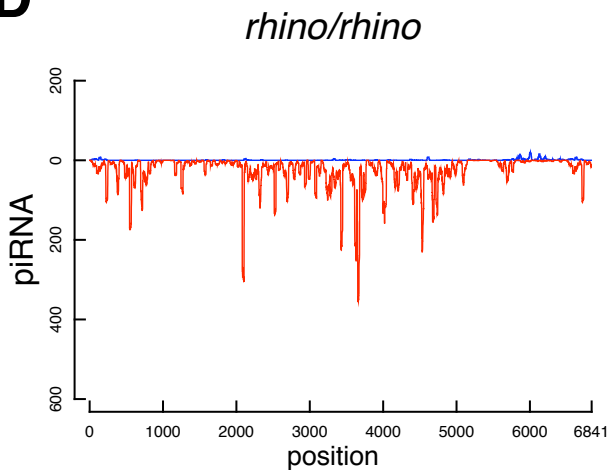**F**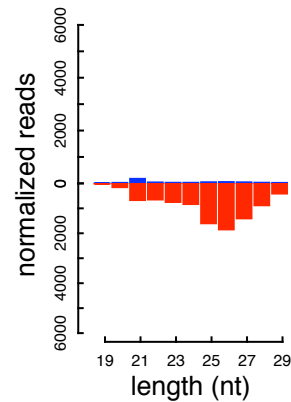**H**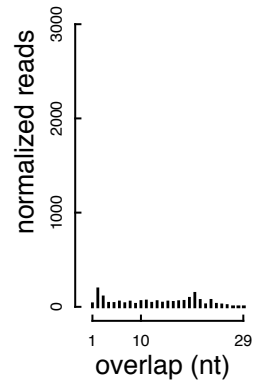



# *gypsy3*

**A**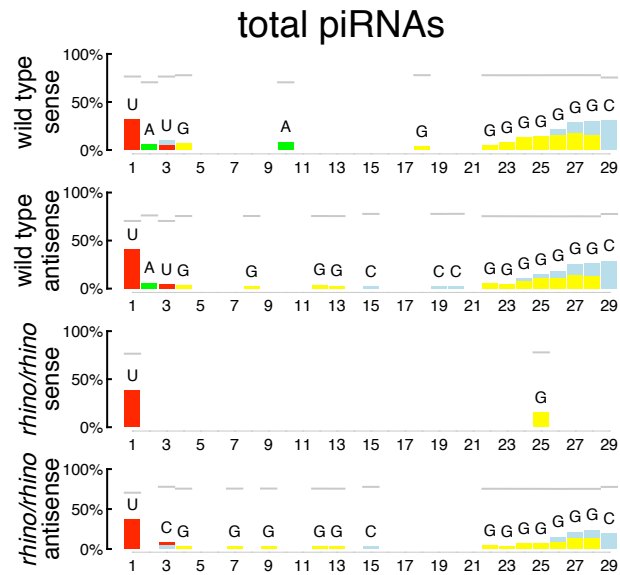**B**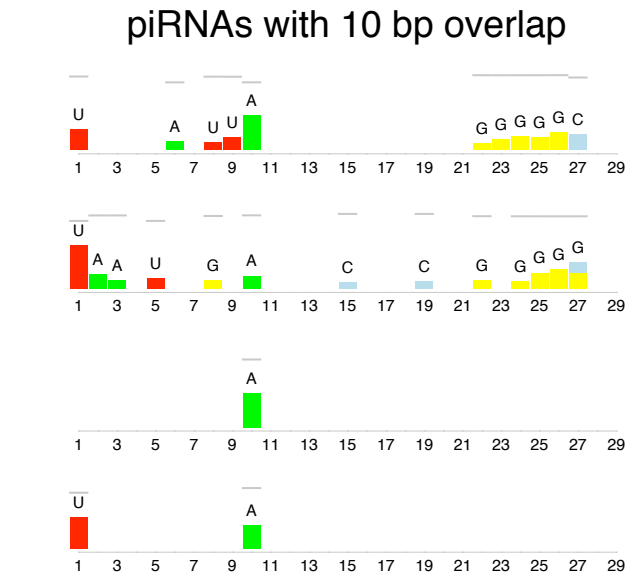**C**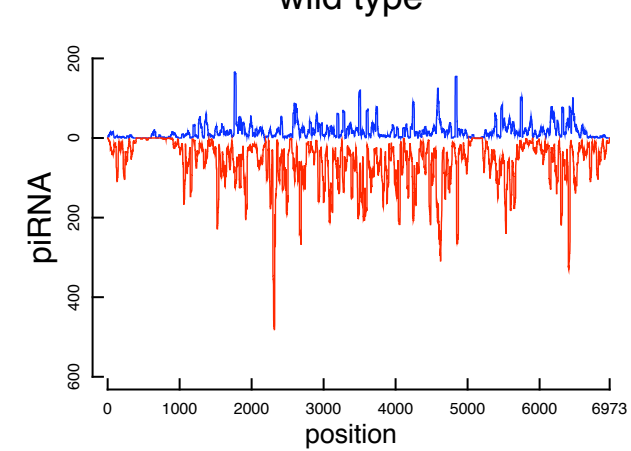**E**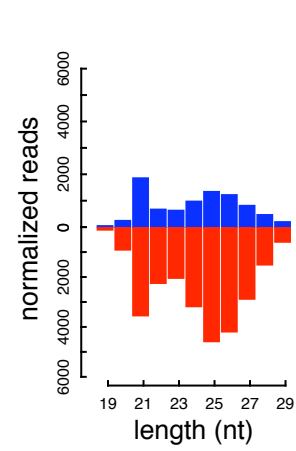**G**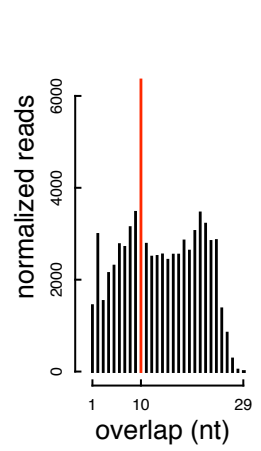**D**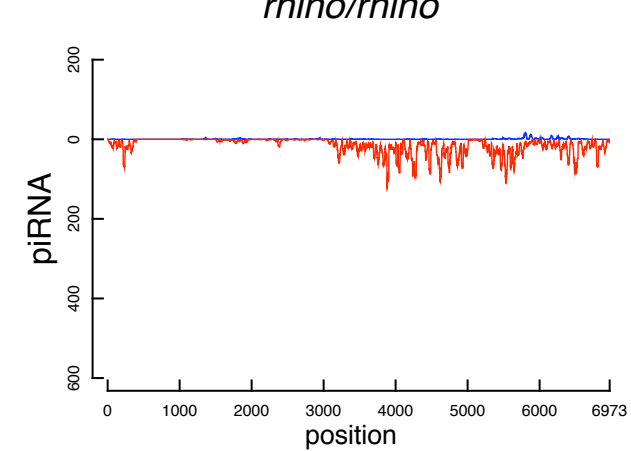**F**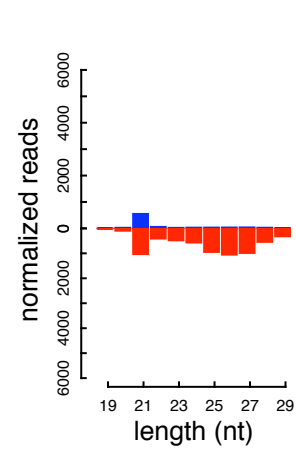**H**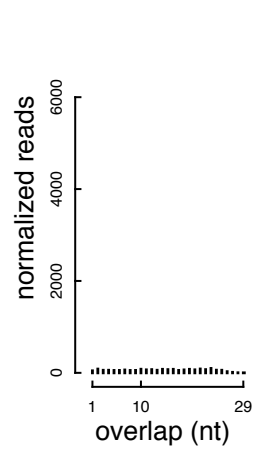

# *gypsy4*

**A**

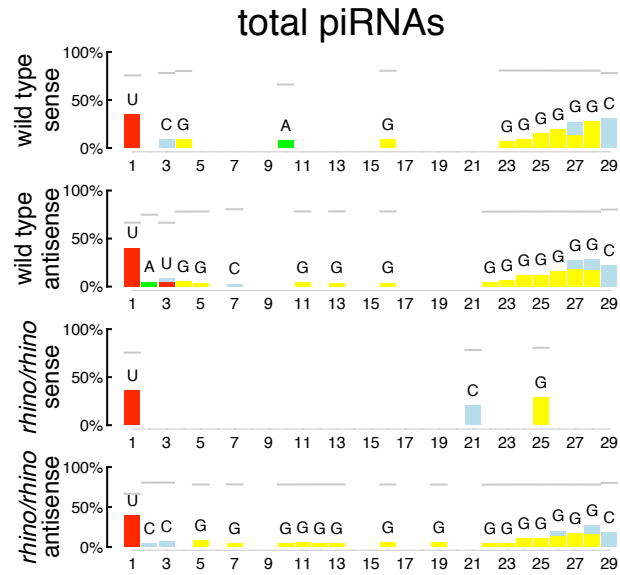

**B**

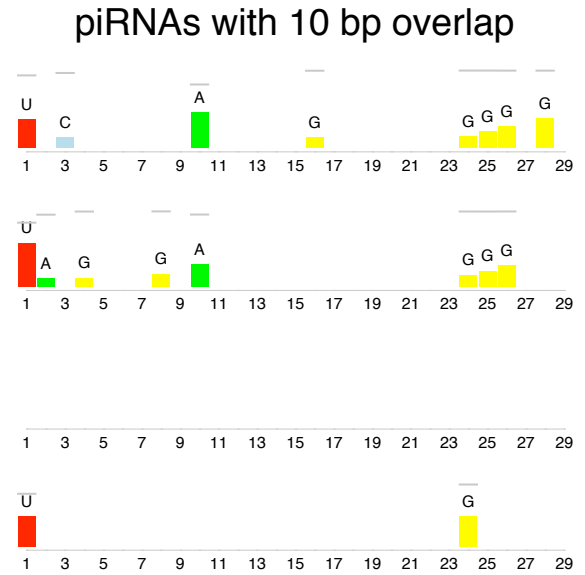

**C**

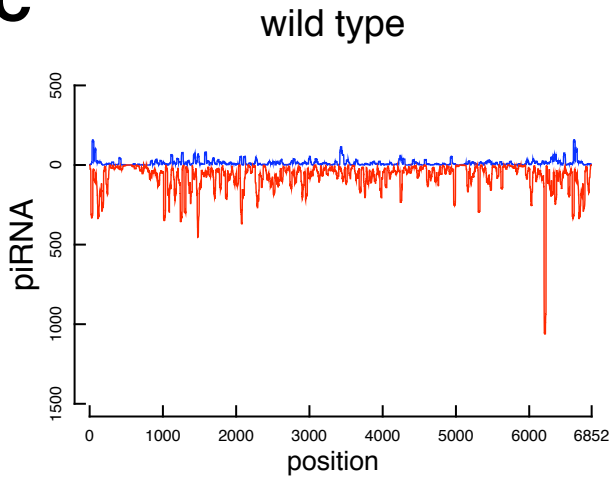

**E**

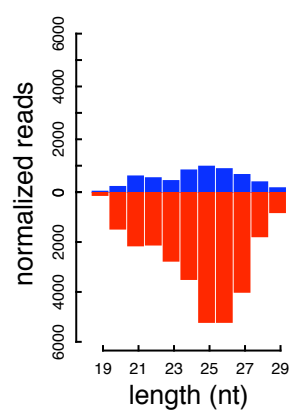

**G**

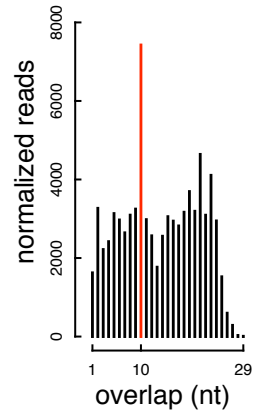

**D**

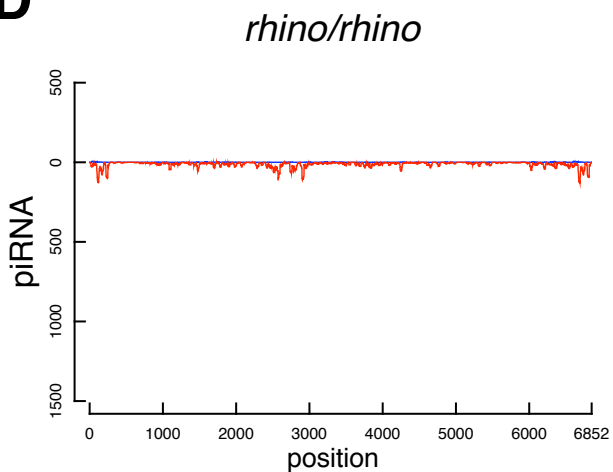

**F**

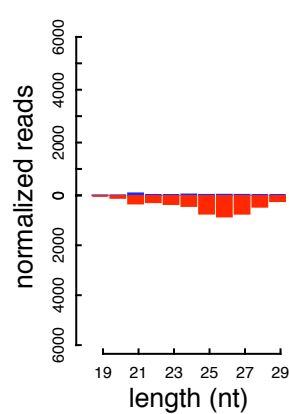

**H**

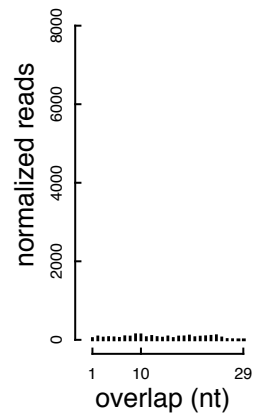

# *gypsy5*

**A**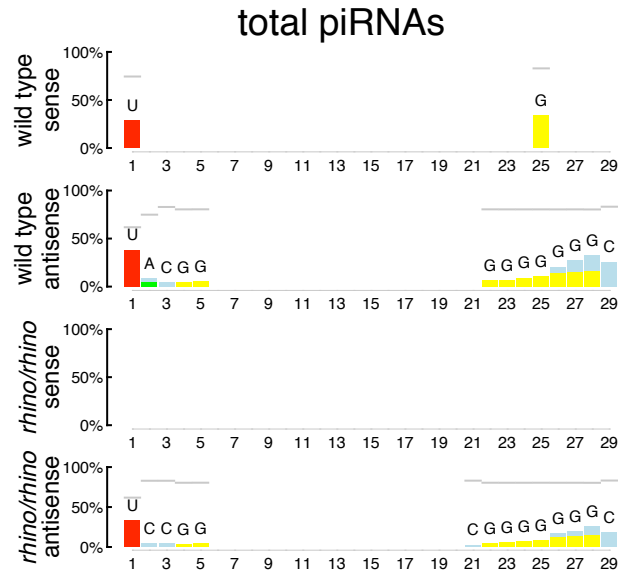**B**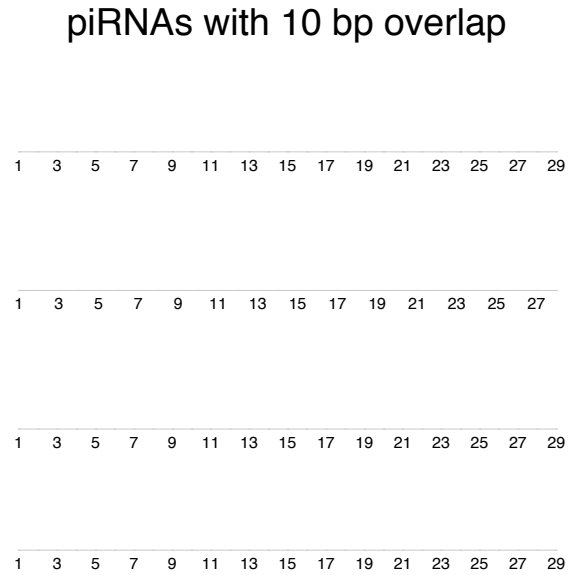**C**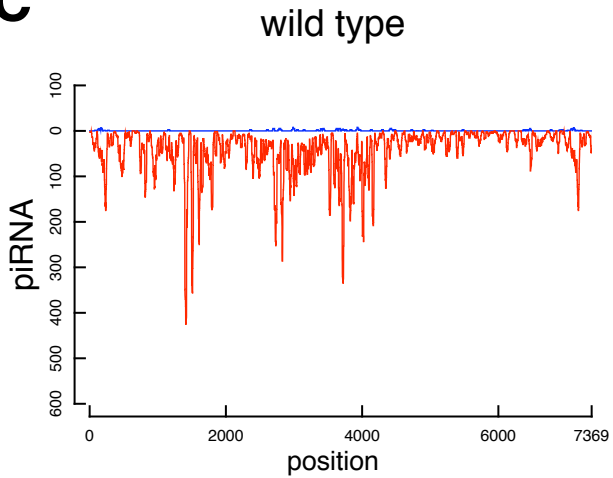**E**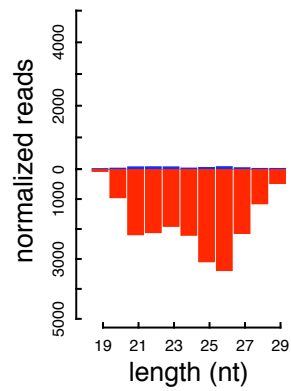**G**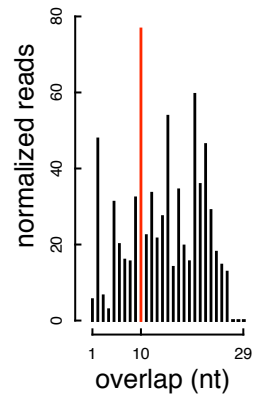**D**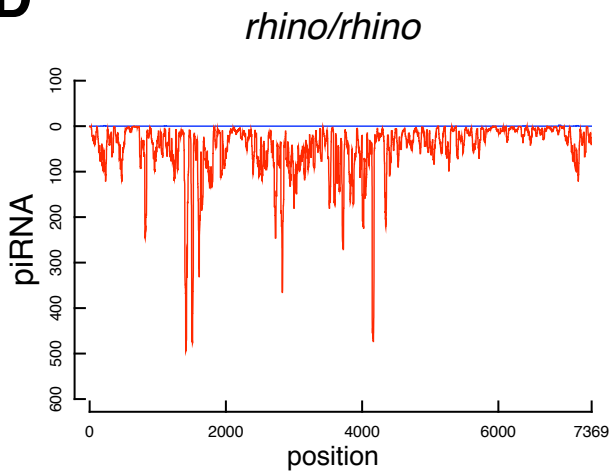**F**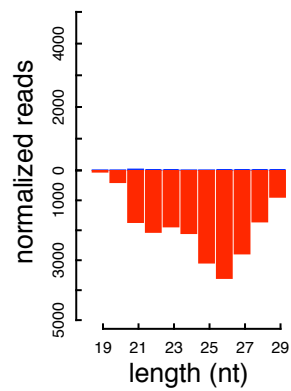**H**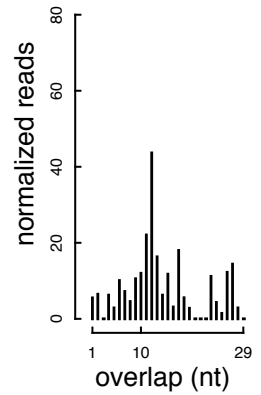

# *gypsy6*

**A**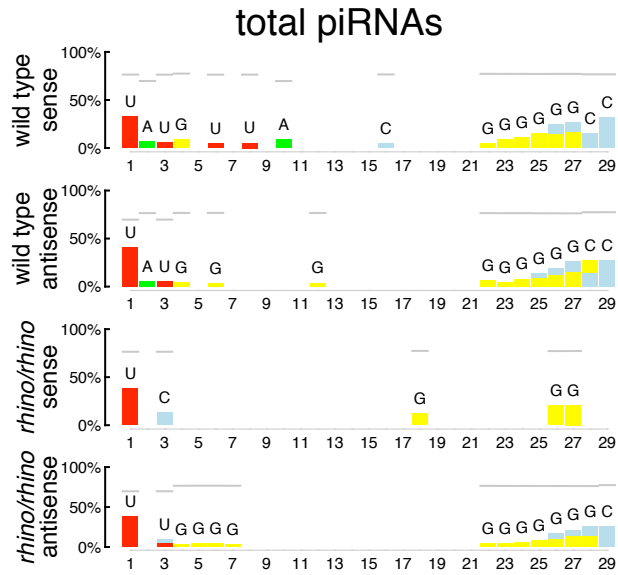**B**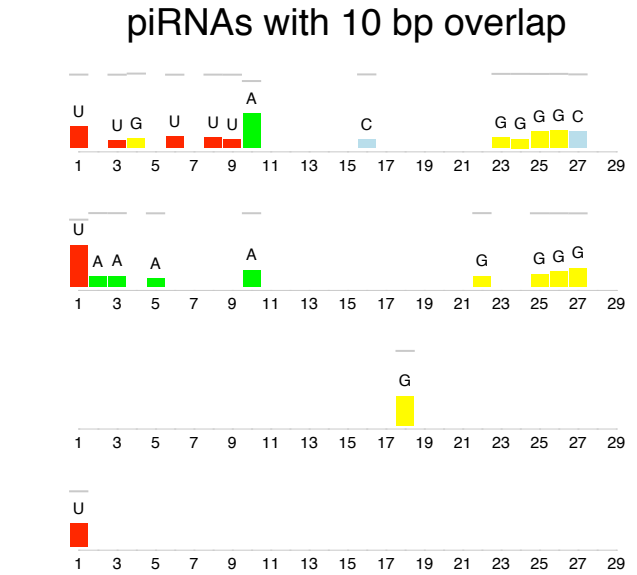**C**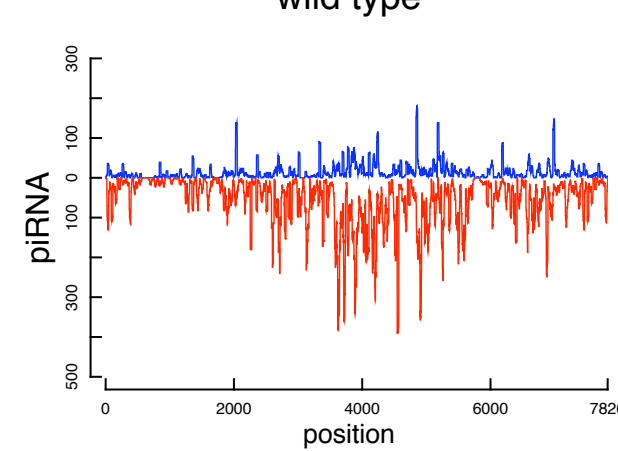**E**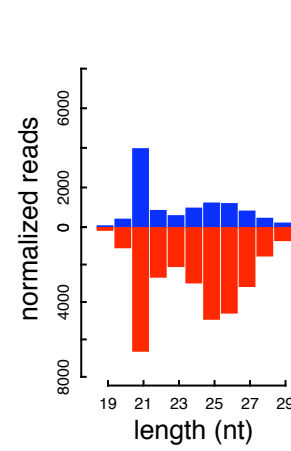**G**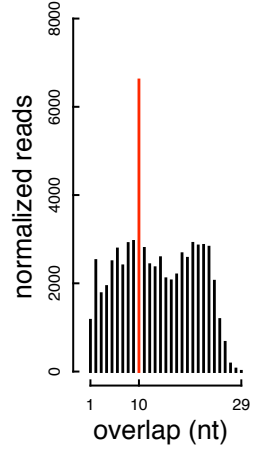**D**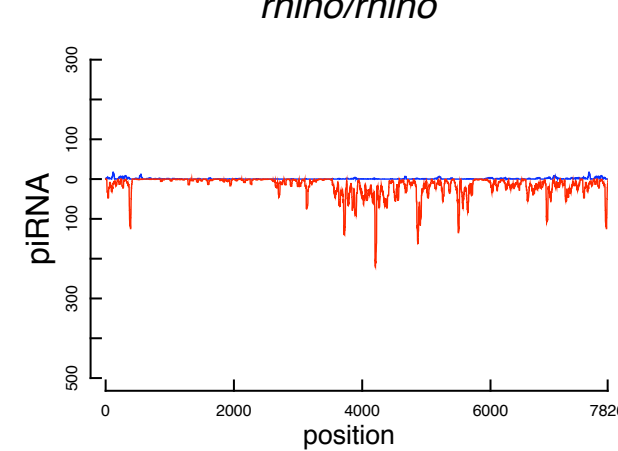**F**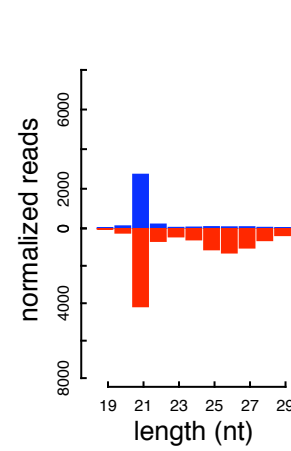**H**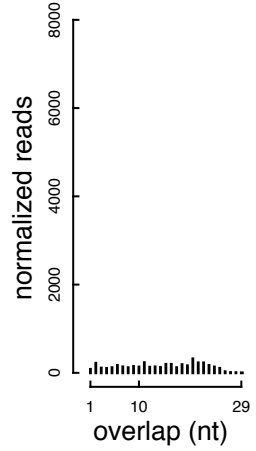

# *gypsy8*

**A**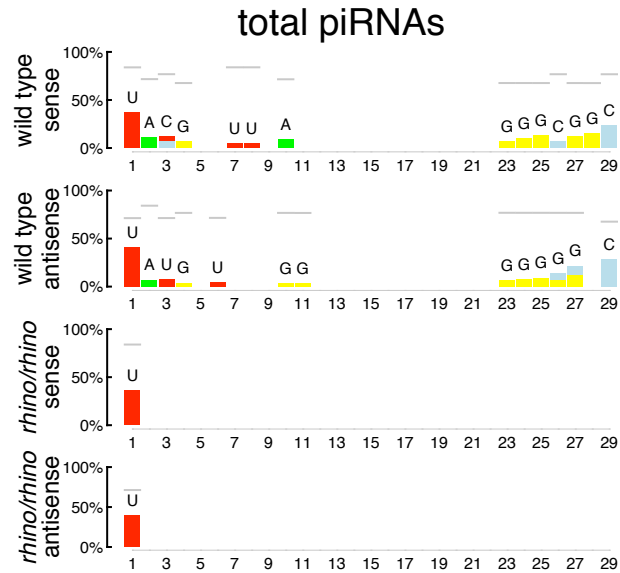**B**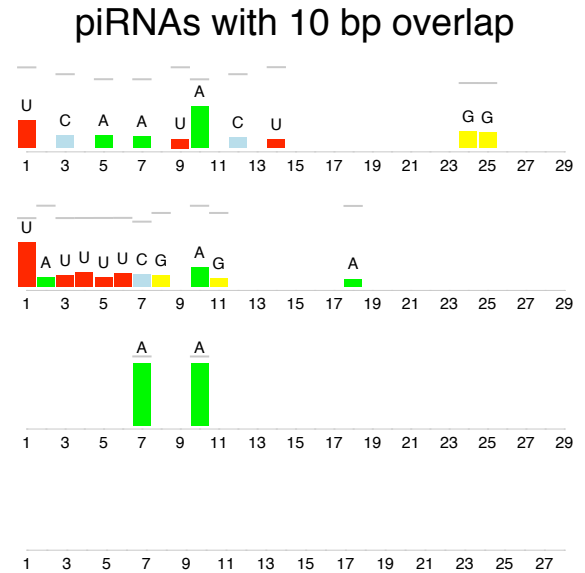**C**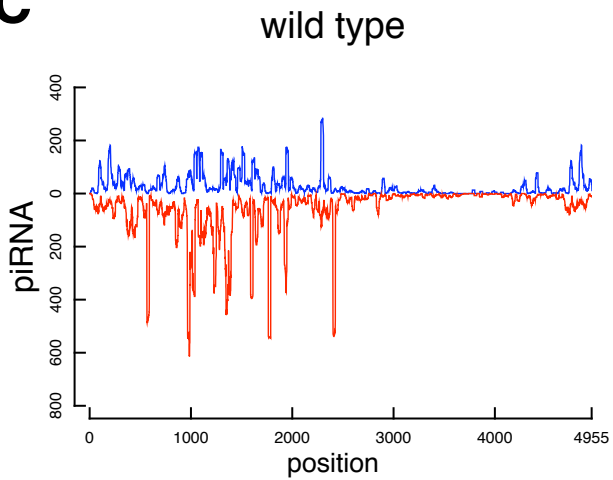**D**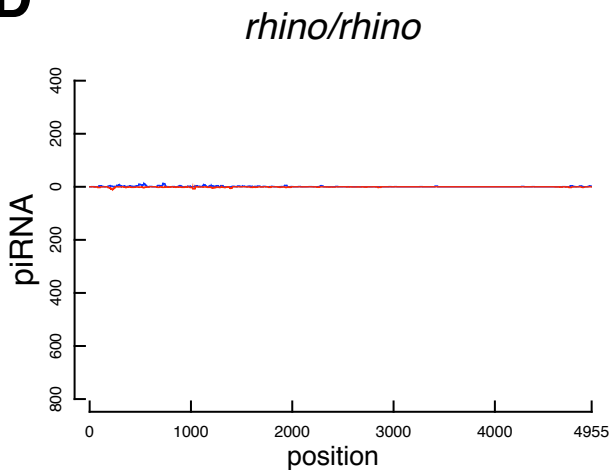**E**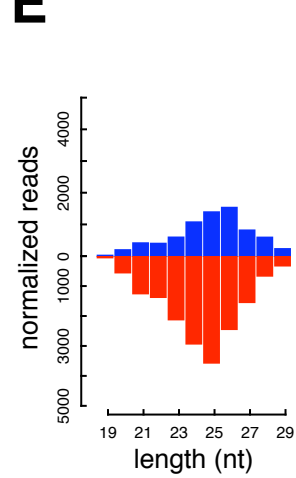**F**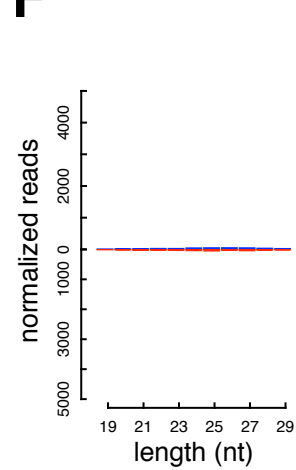**G**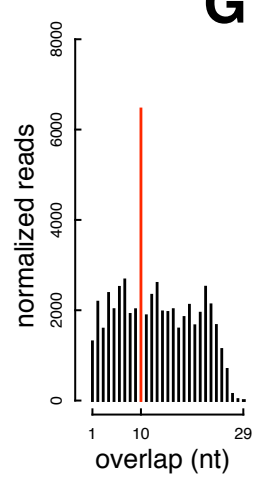**H**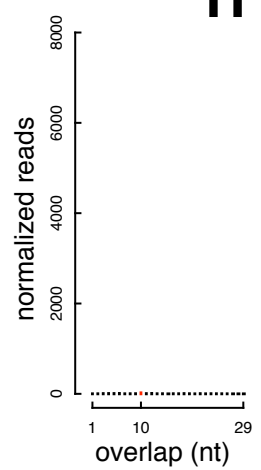

# Helena

**A**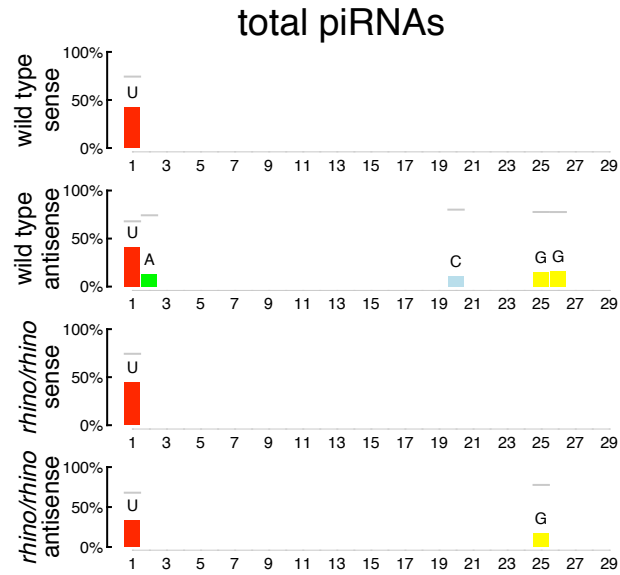**B**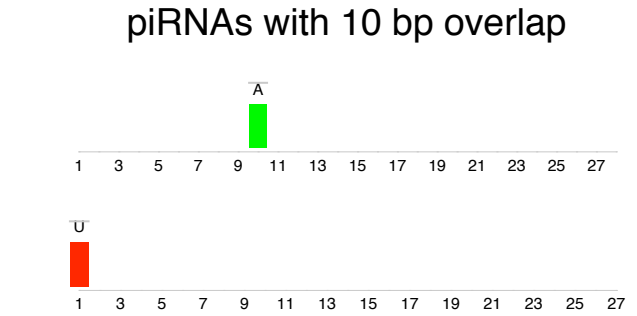**C**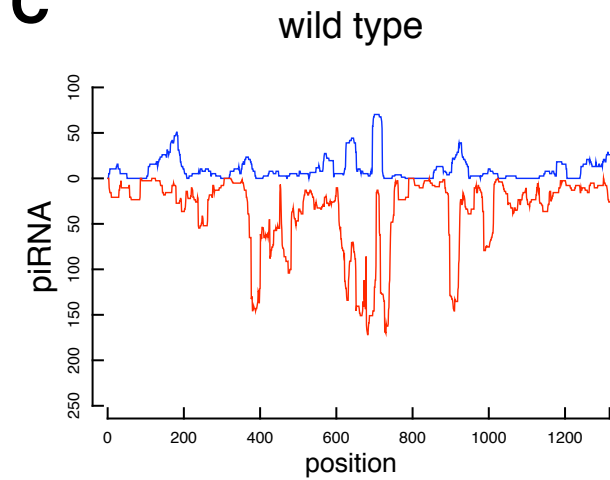**E**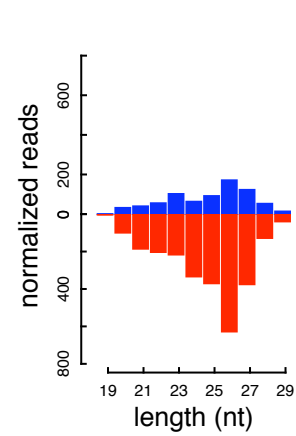**G**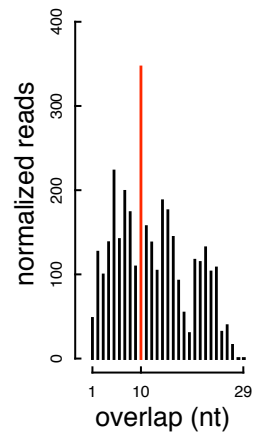**D**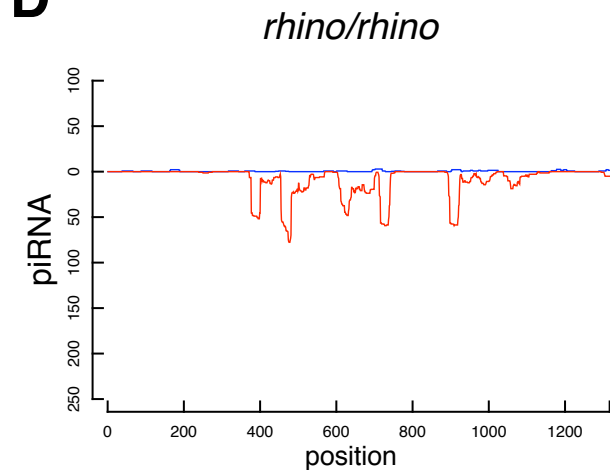**F**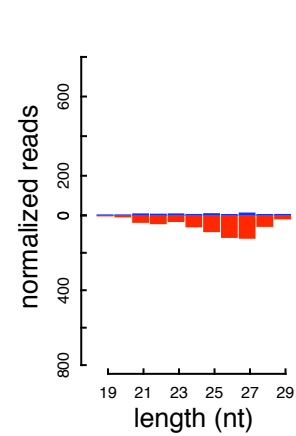**H**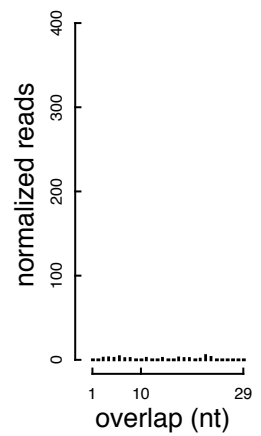

# HeT A

**A**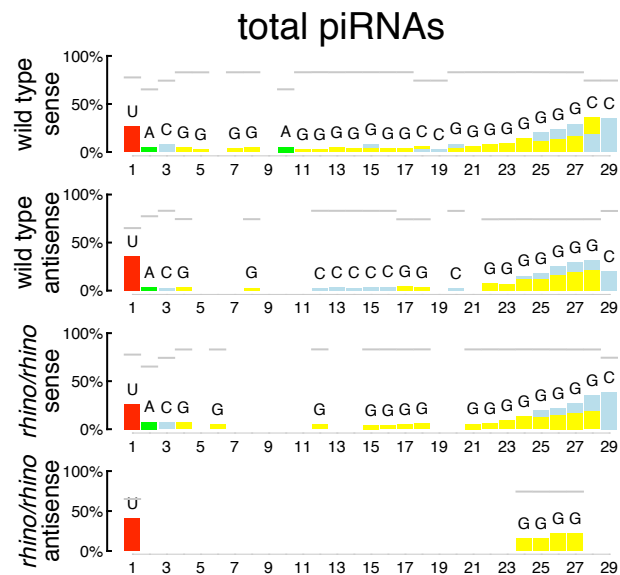**B**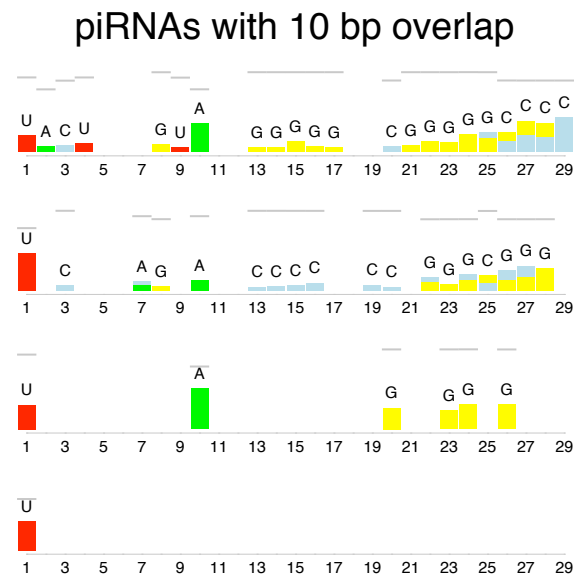**C**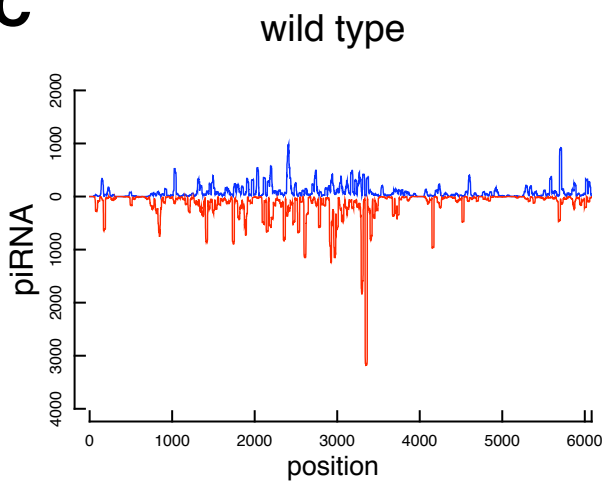**E**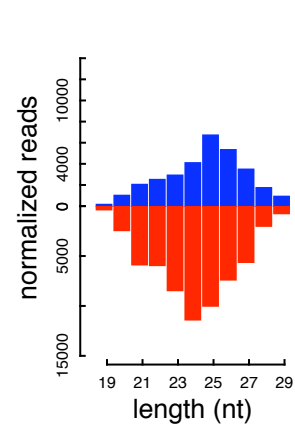**G**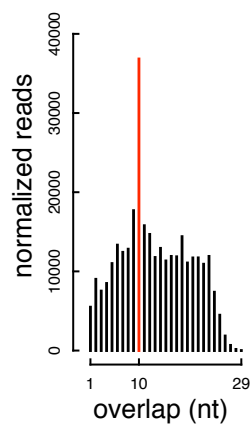**D**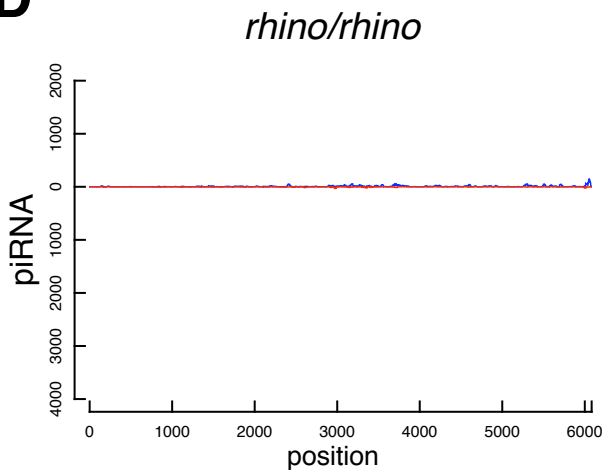**F**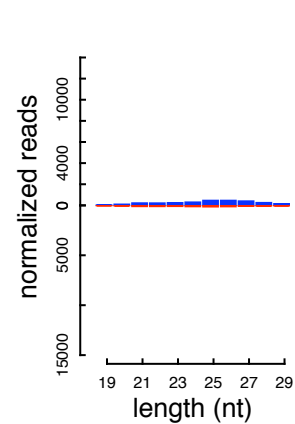**H**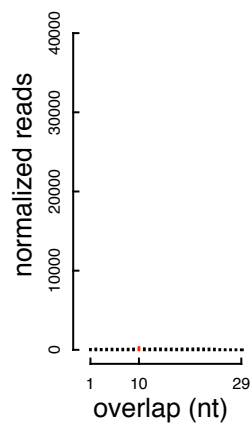

# HMS Beagle

**A**

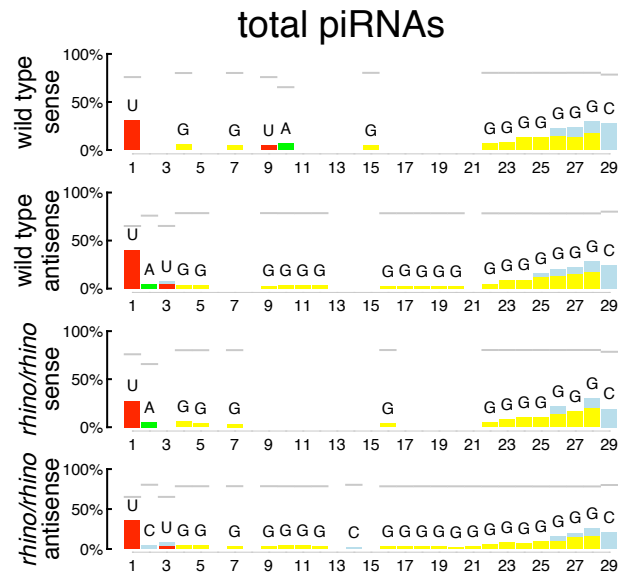

**B**

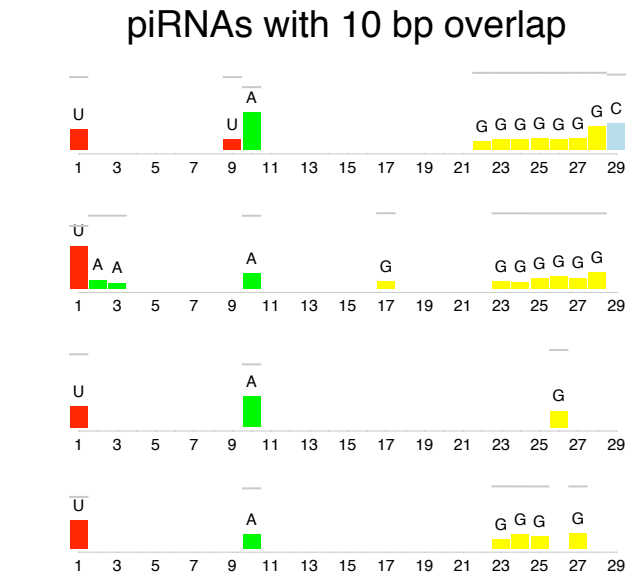

**C**

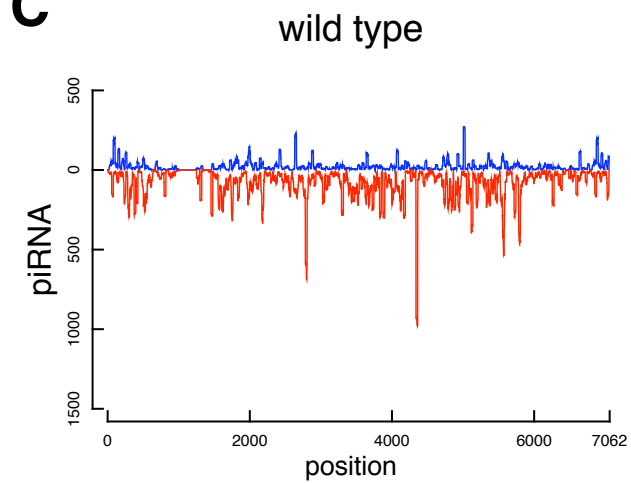

**E**

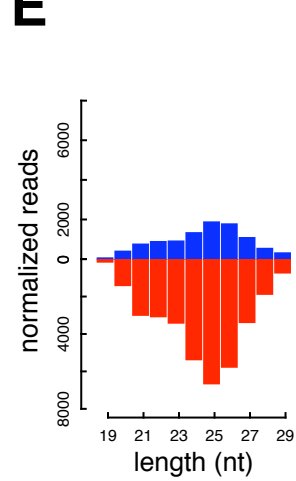

**G**

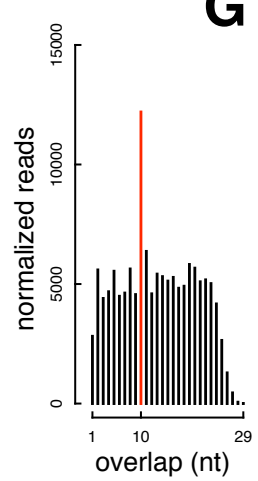

**D**

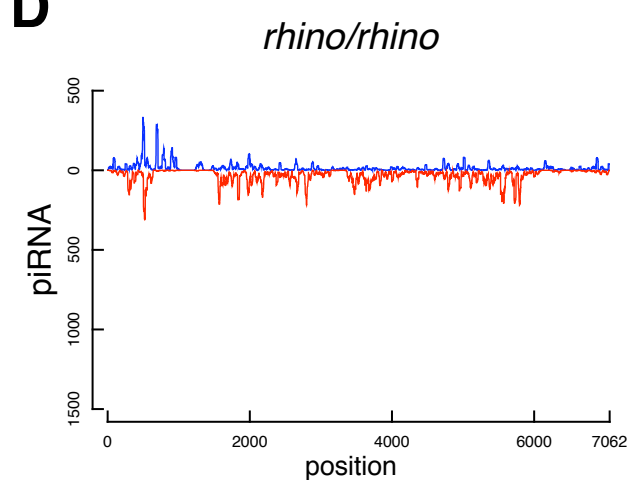

**F**

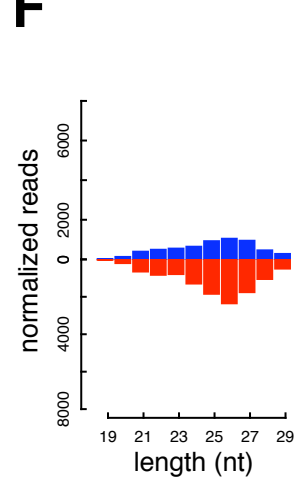

**H**

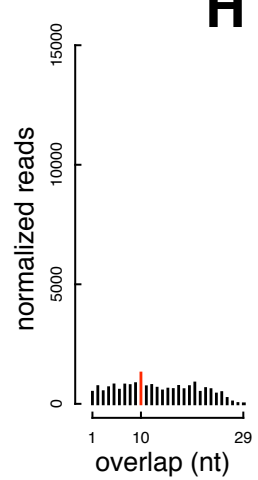



# HMS Beagle2

**A**

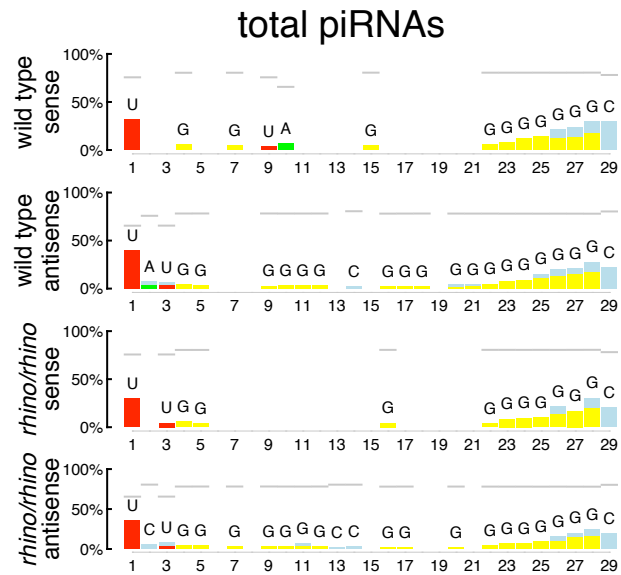

**B**

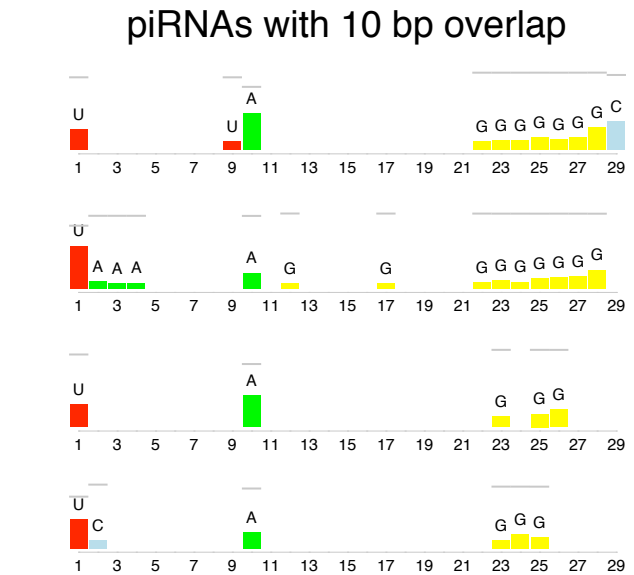

**C**

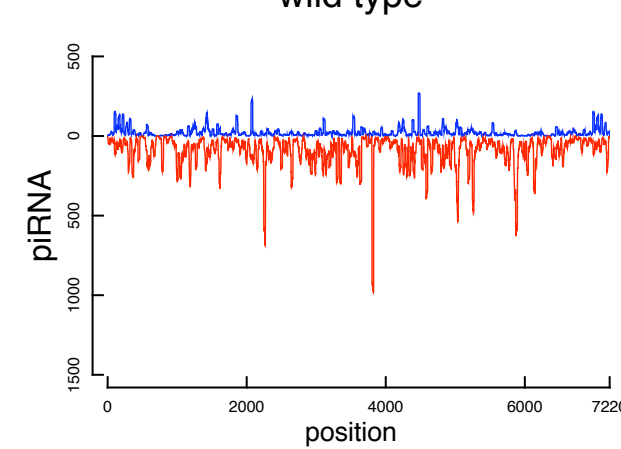

**D**

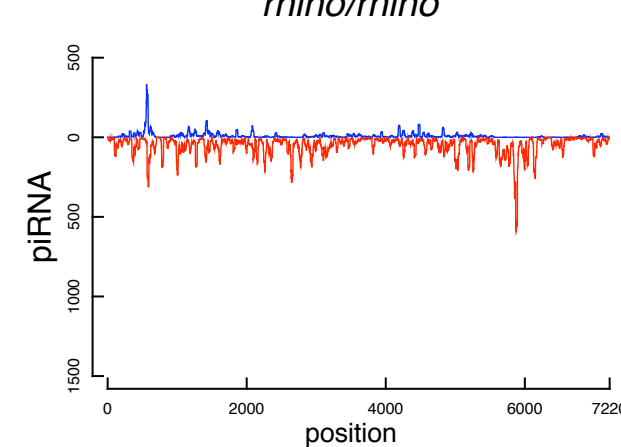

**E**

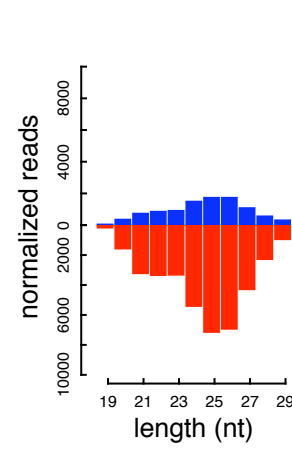

**F**

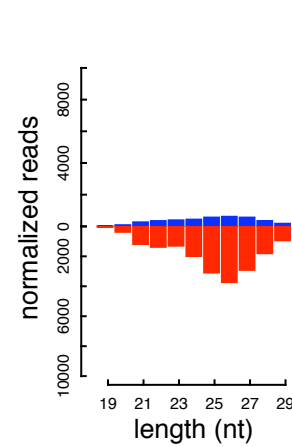

**G**

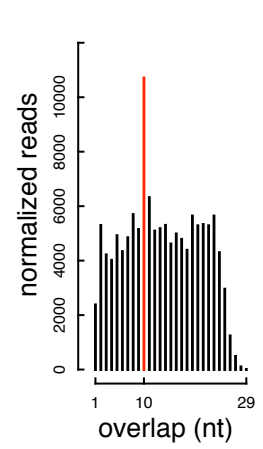

**H**

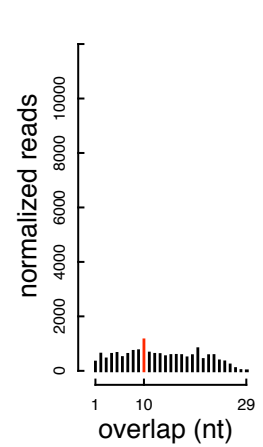

# *hobo*

**A**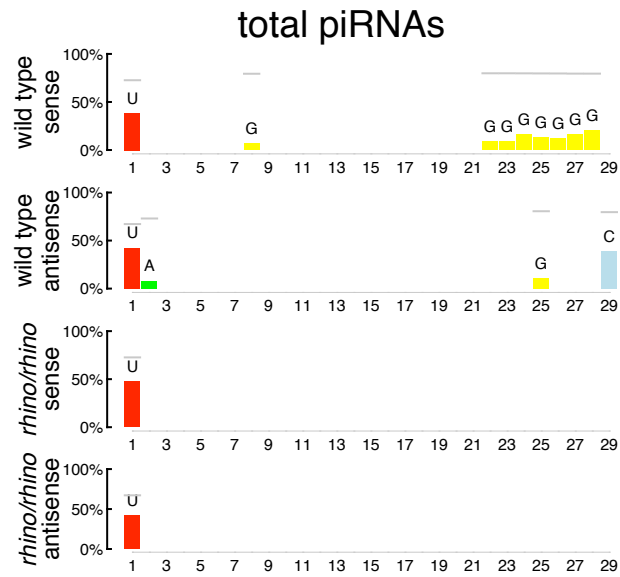**B**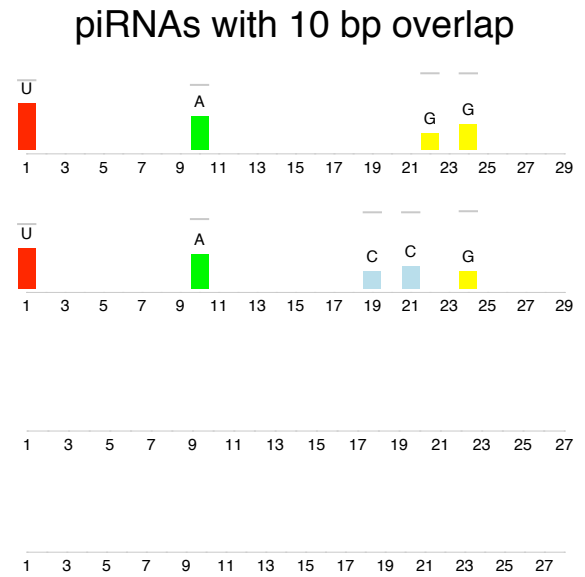**C**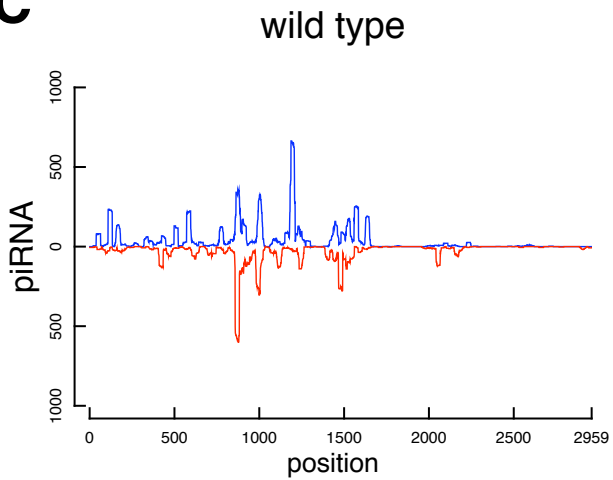**E**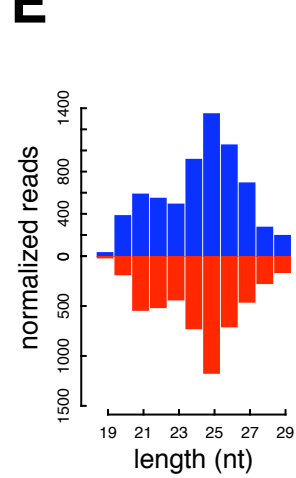**G**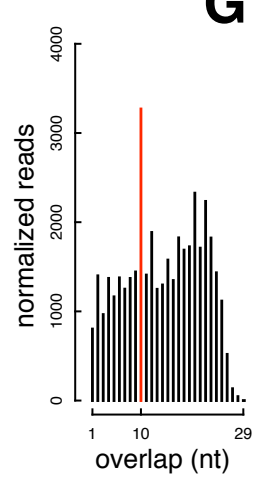**D**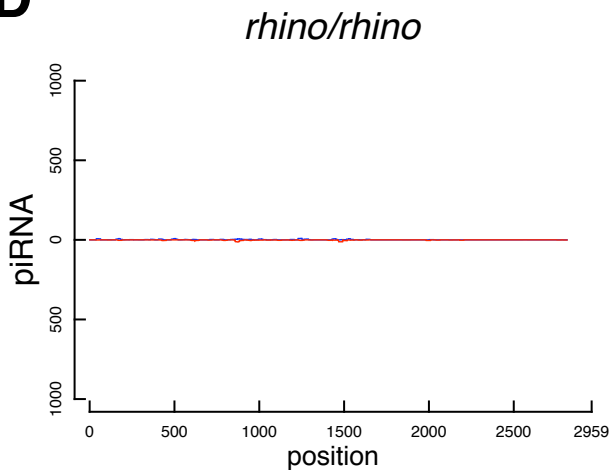**F**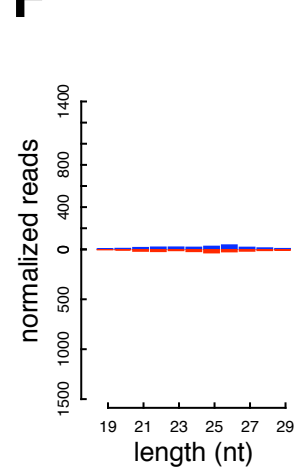**H**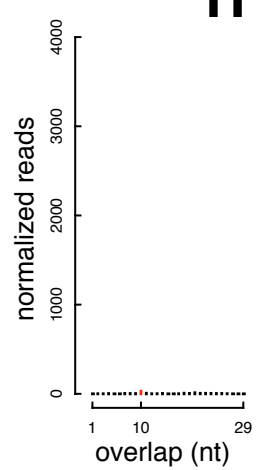

# *hopper*

**A**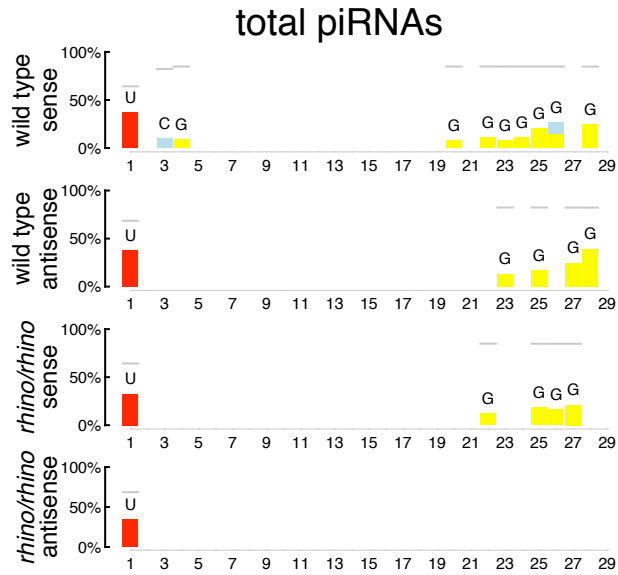**B**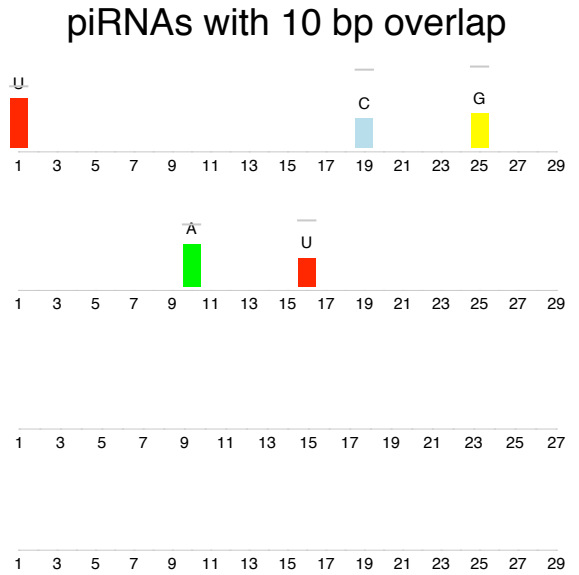**C**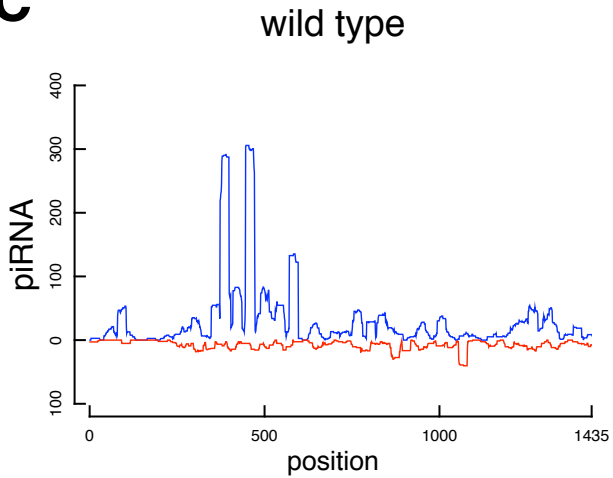**E**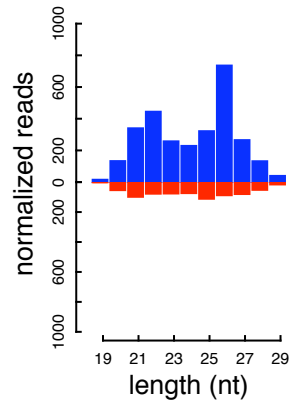**G**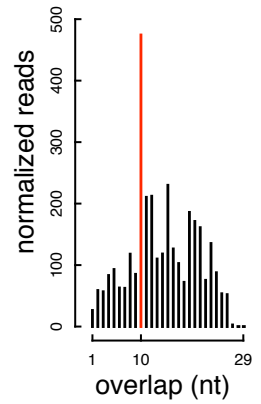**D**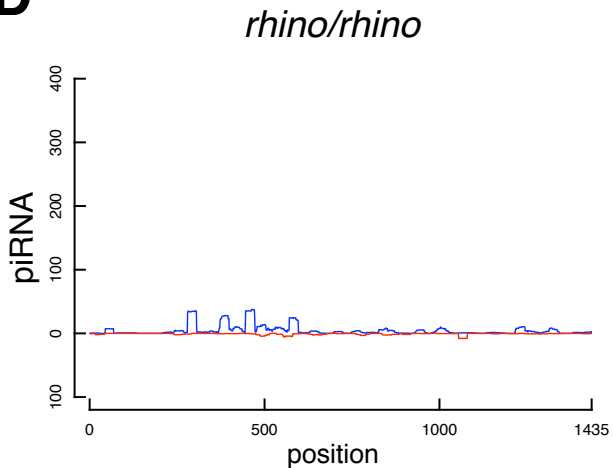**F**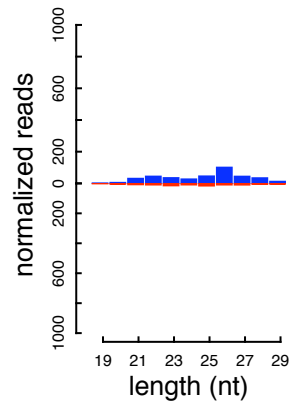**H**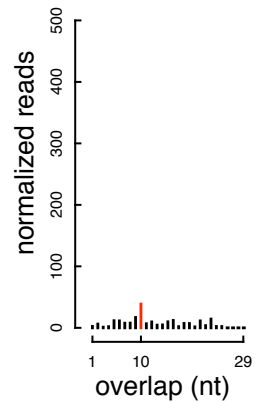

# *hopper2*

**A**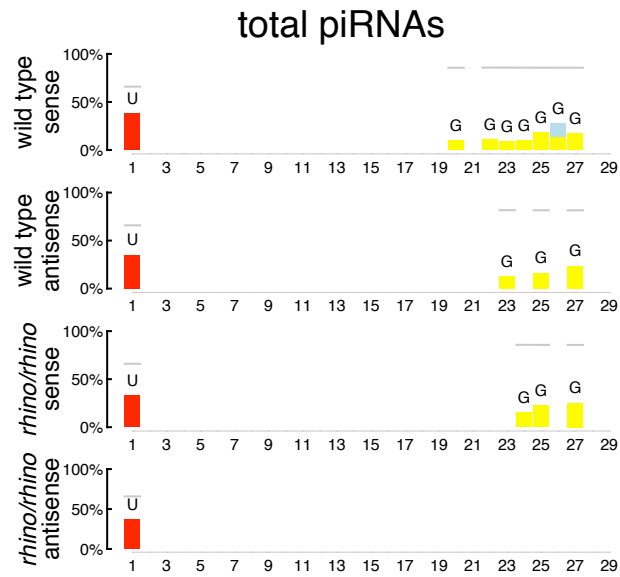**B**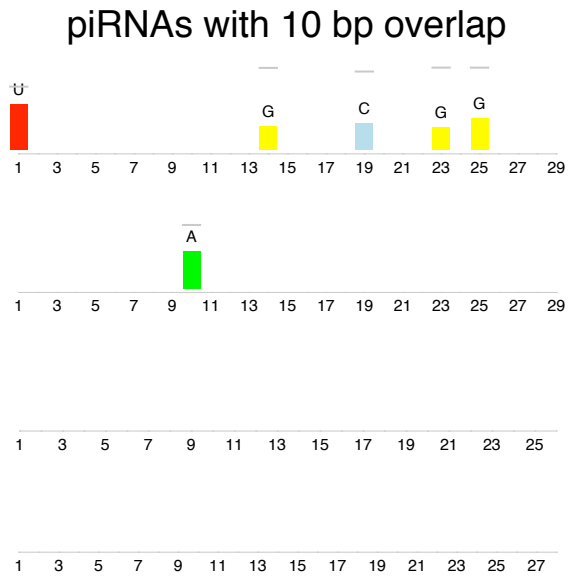**C**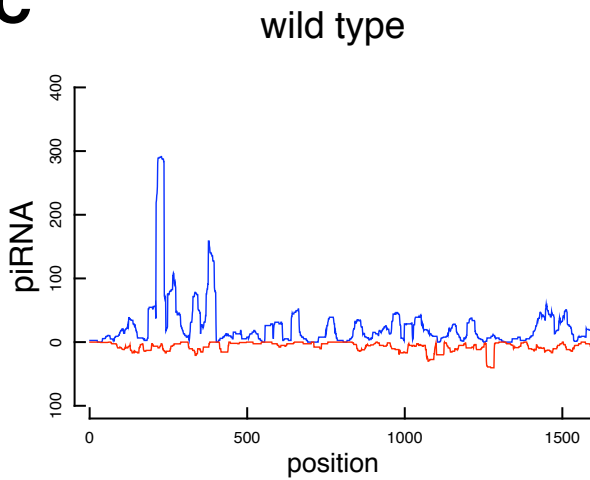**E**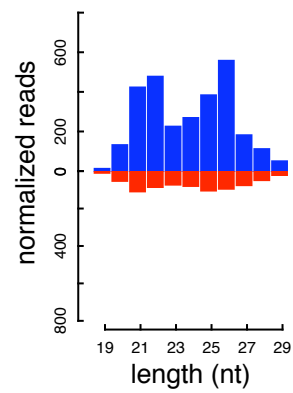**G**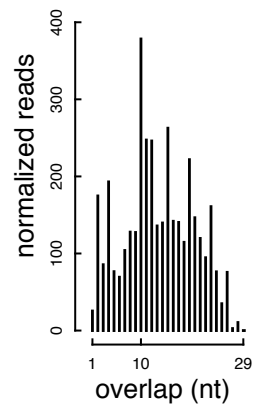**D**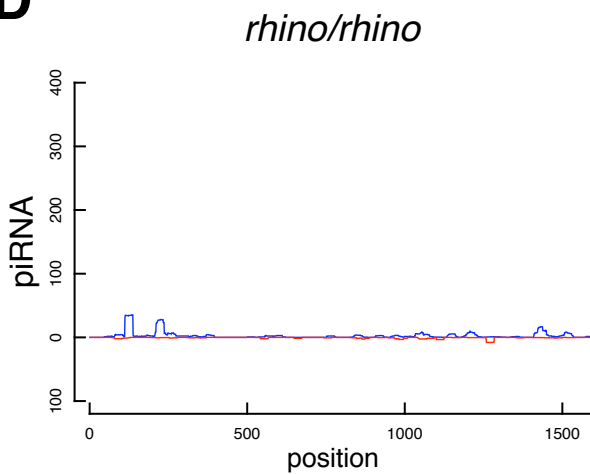**F**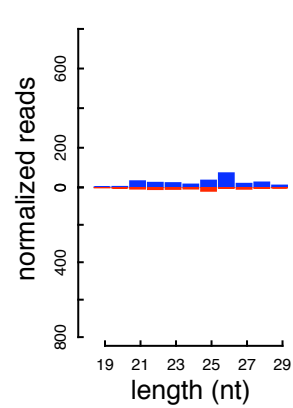**H**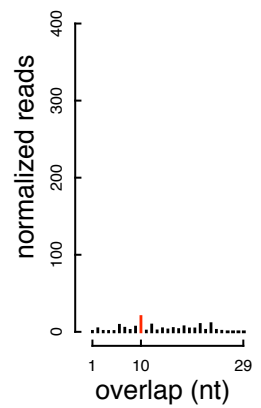

# Idefix

**A**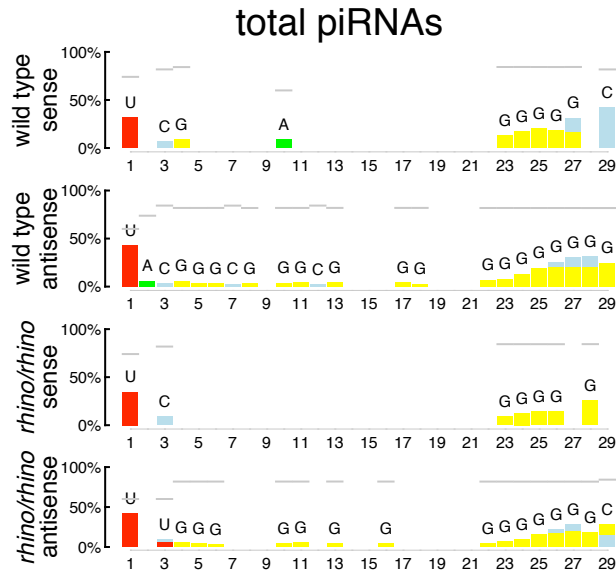**B**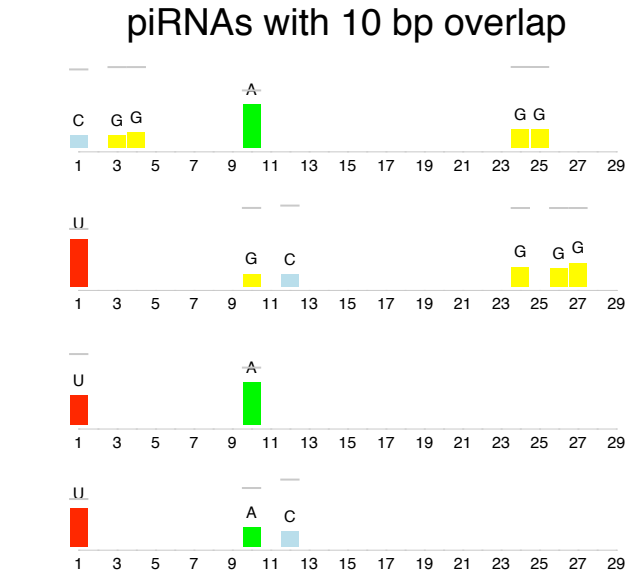**C**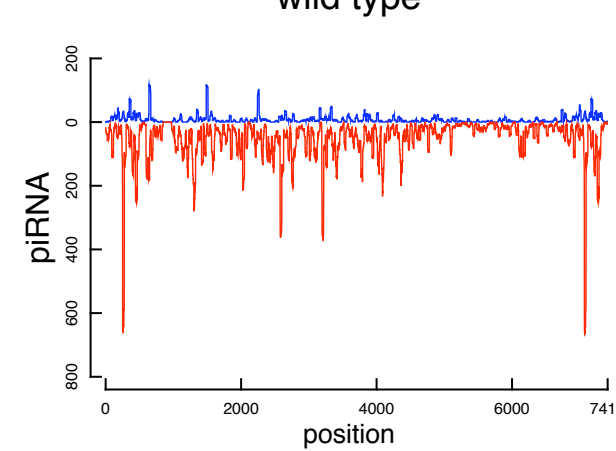**E**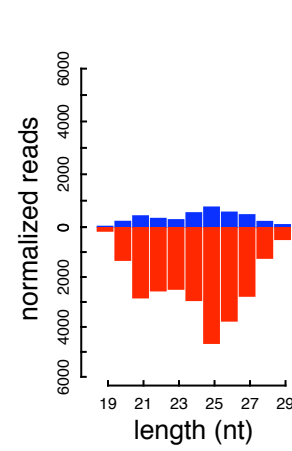**G**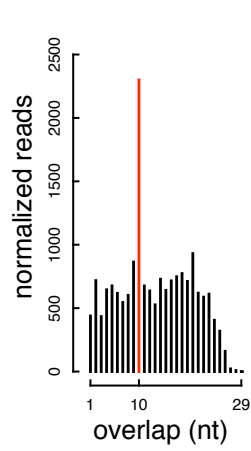**D**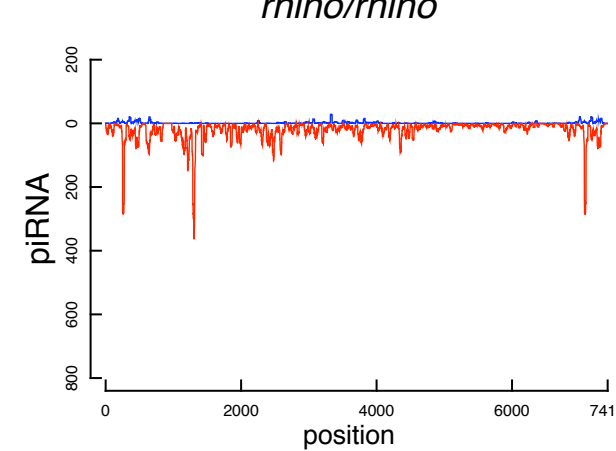**F**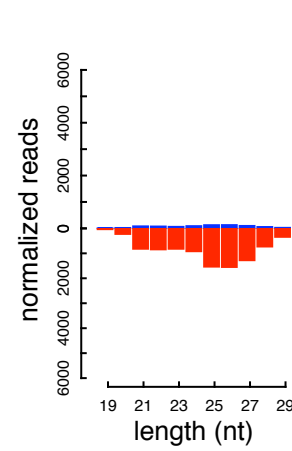**H**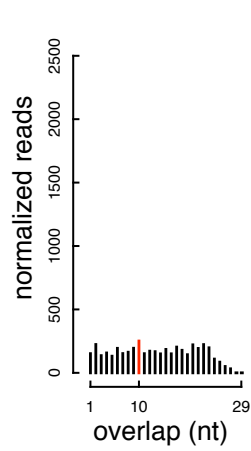

# *I* element

**A**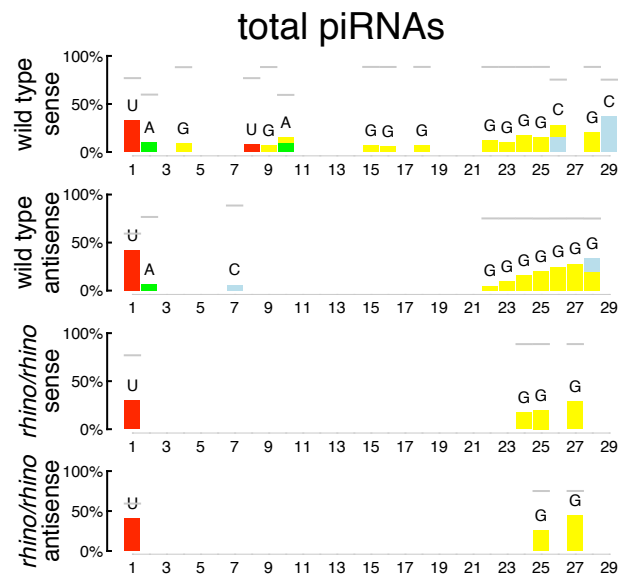**B**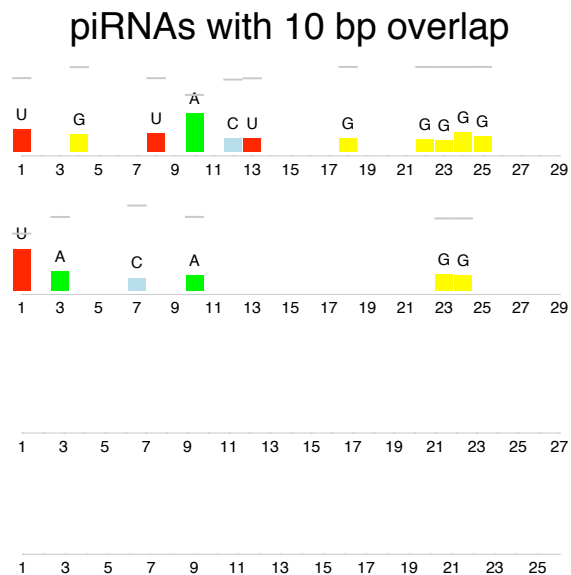**C**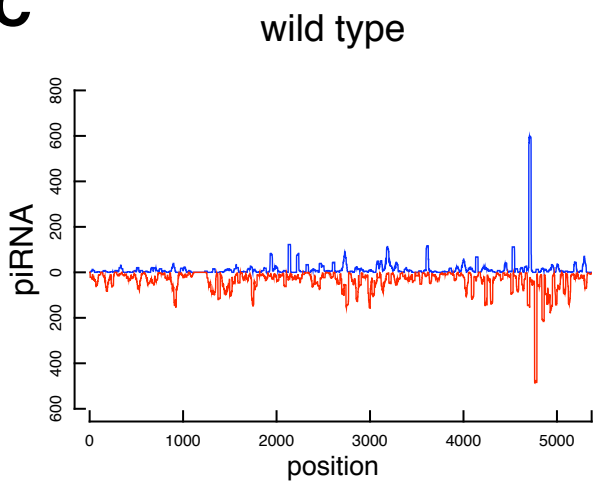**E**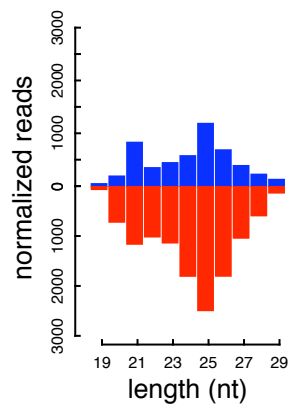**G**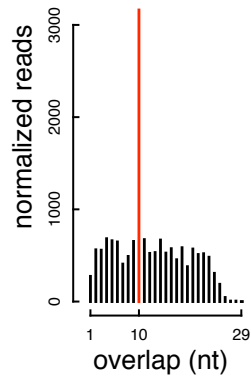**D**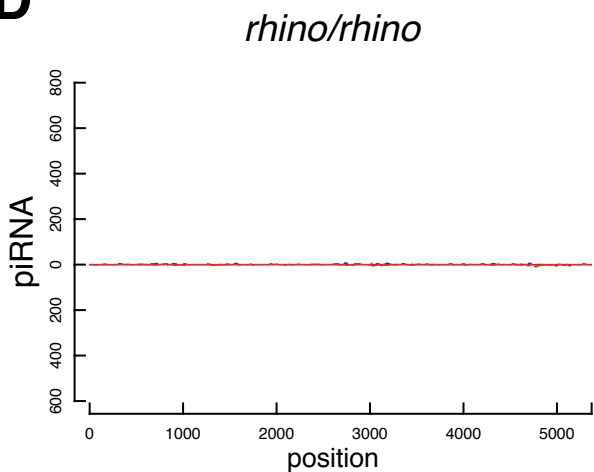**F**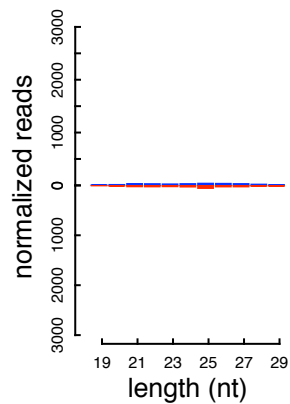**H**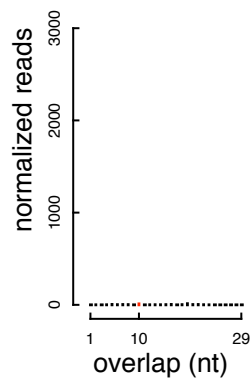

# INE 1

**A**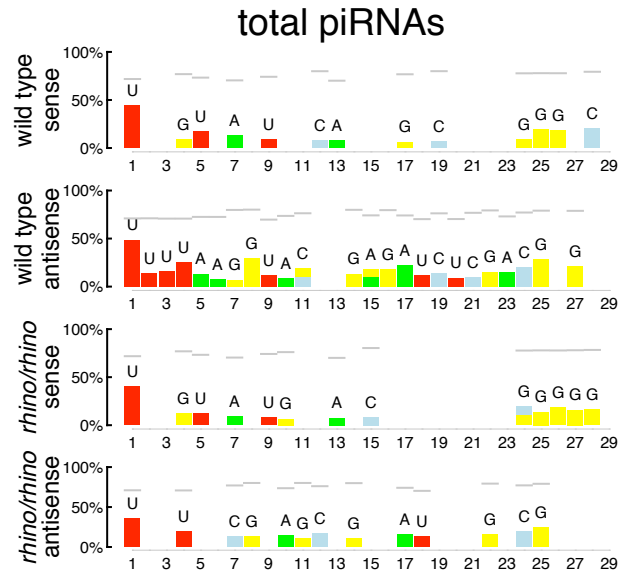**B**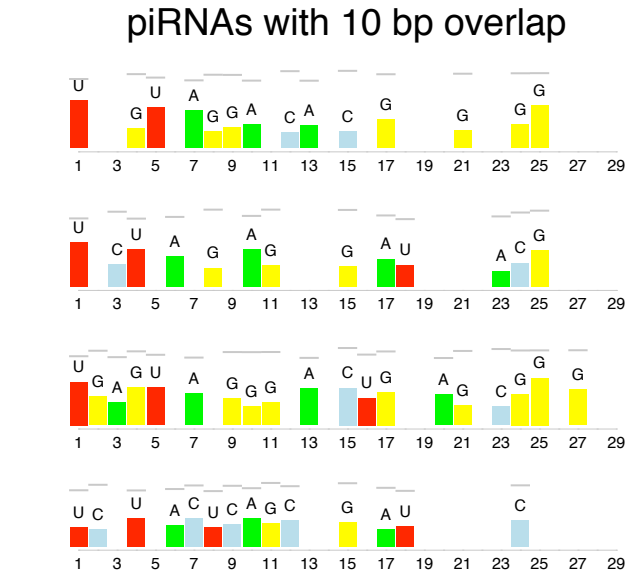**C**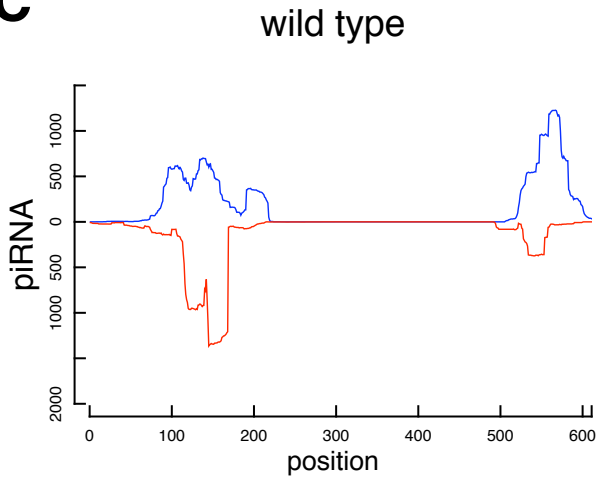**E**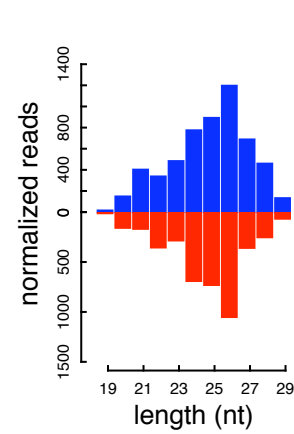**G**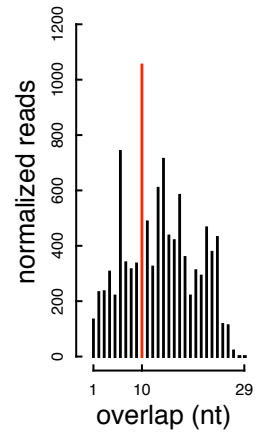**D**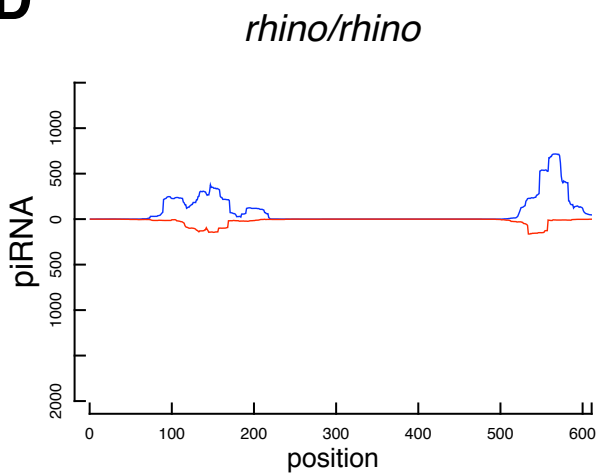**F**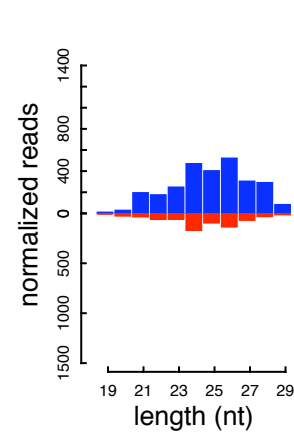**H**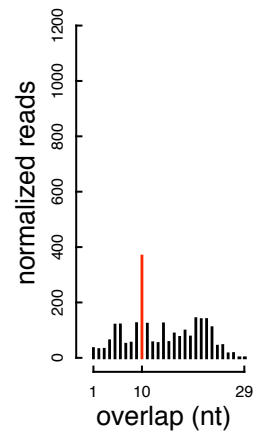

# *invader1*

**A**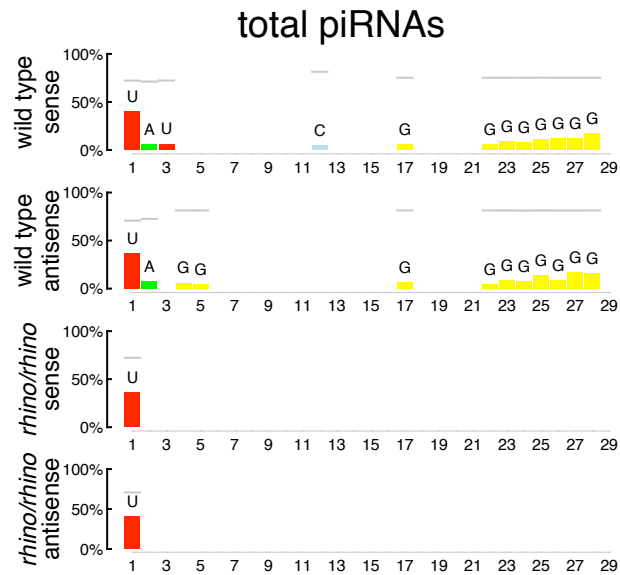**B**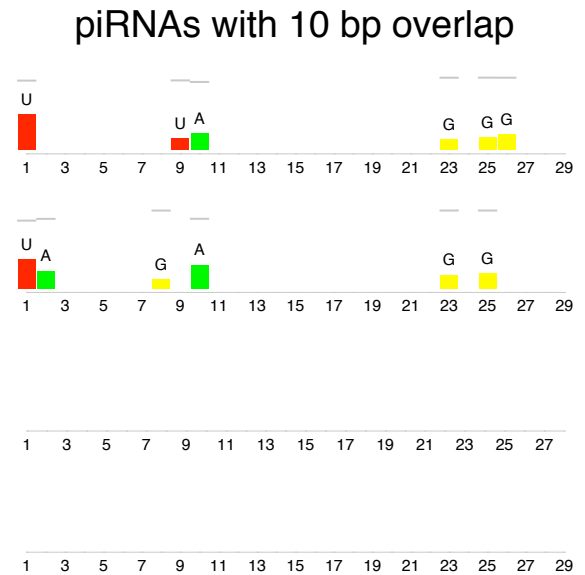**C**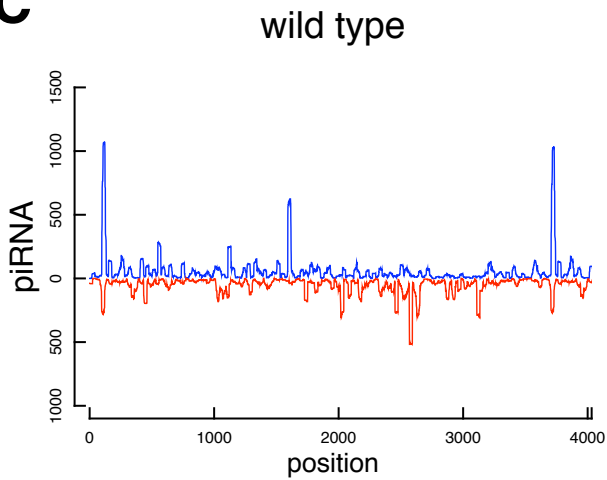**E**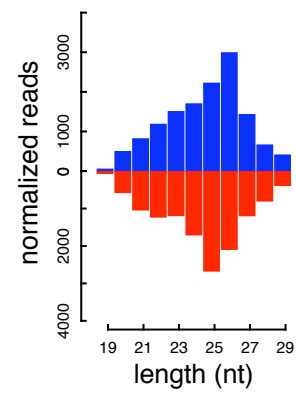**G**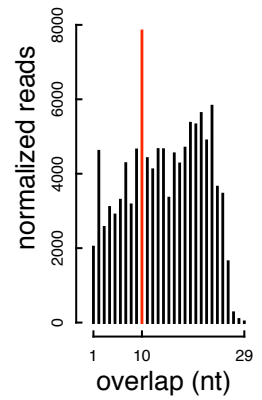**D**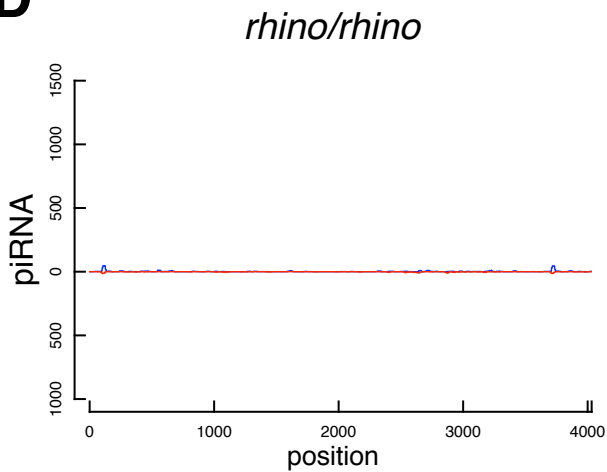**F**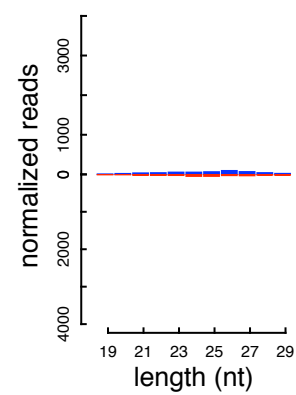**H**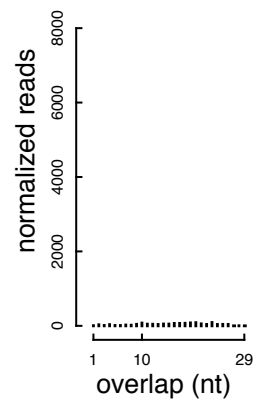



# invader2

**A**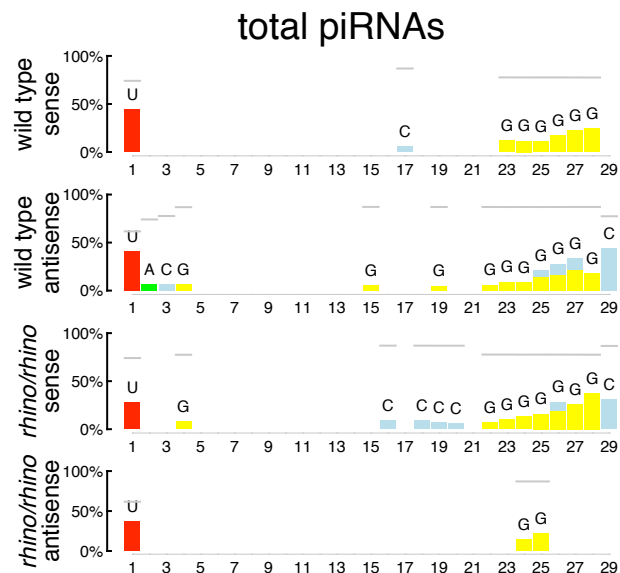**B**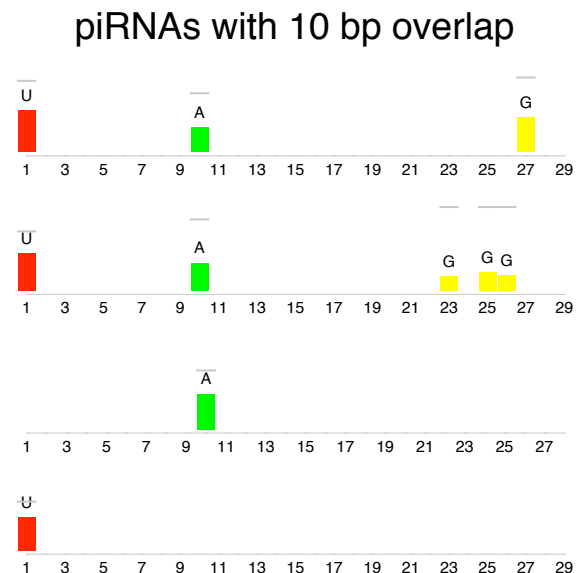**C**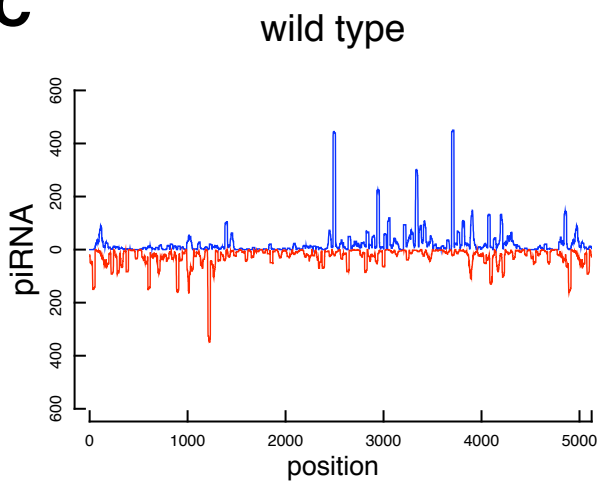**E**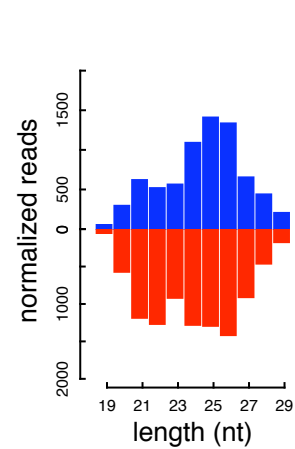**G**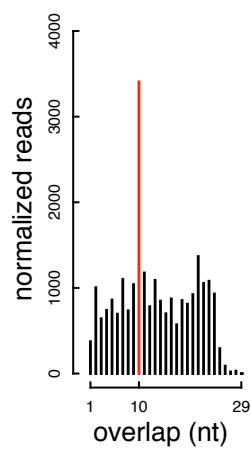**D**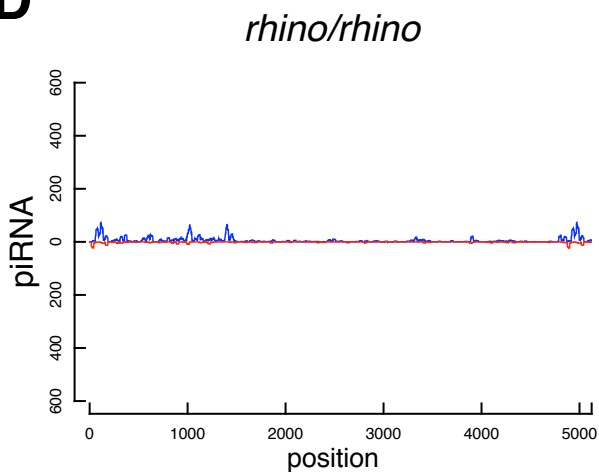**F**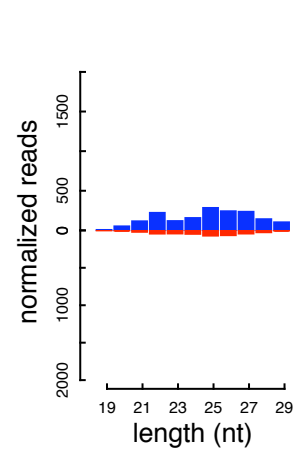**H**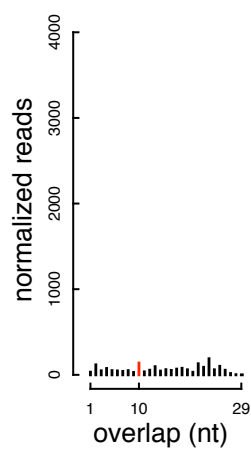

# *invader3*

**A**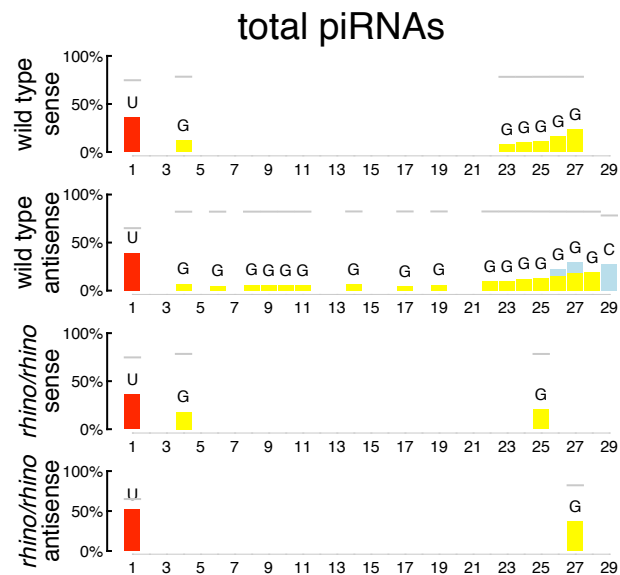**B**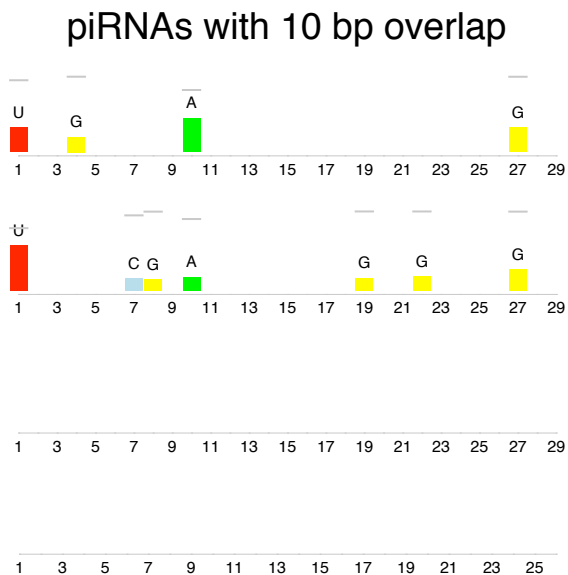**C**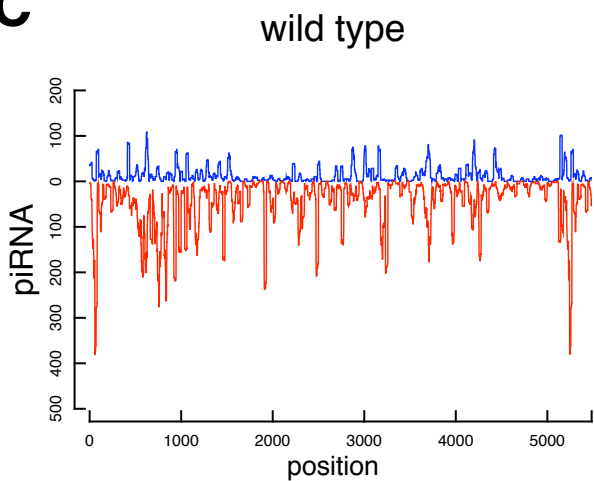**E**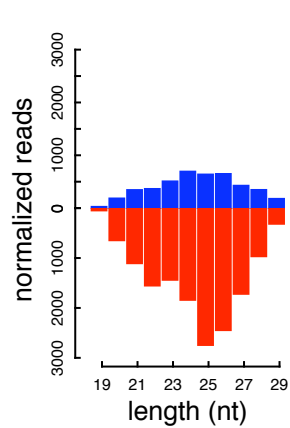**G**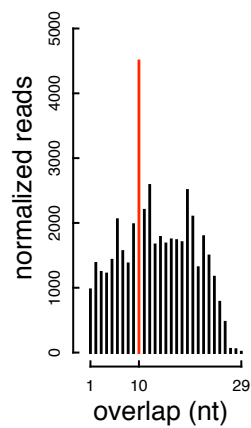**D**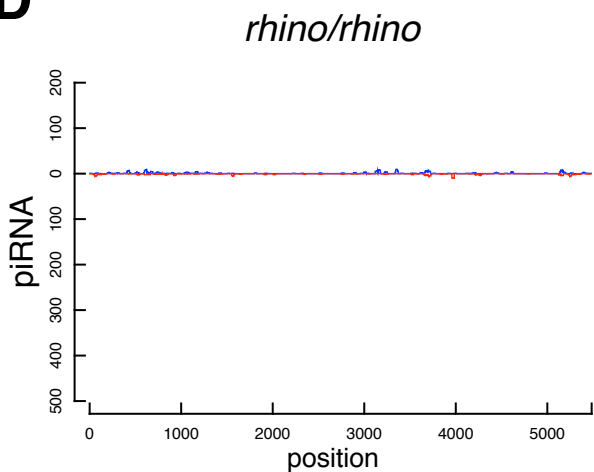**F**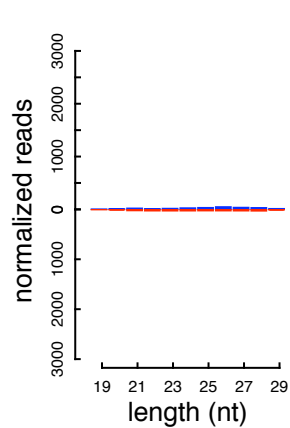**H**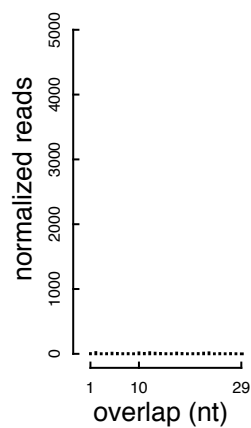

# invader4

**A**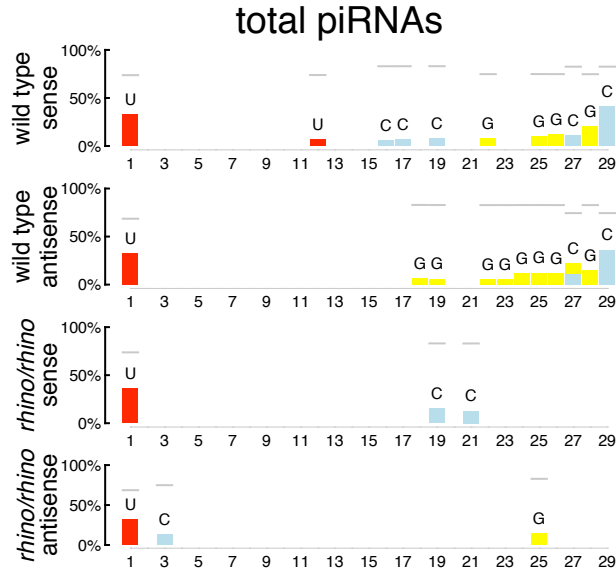**B**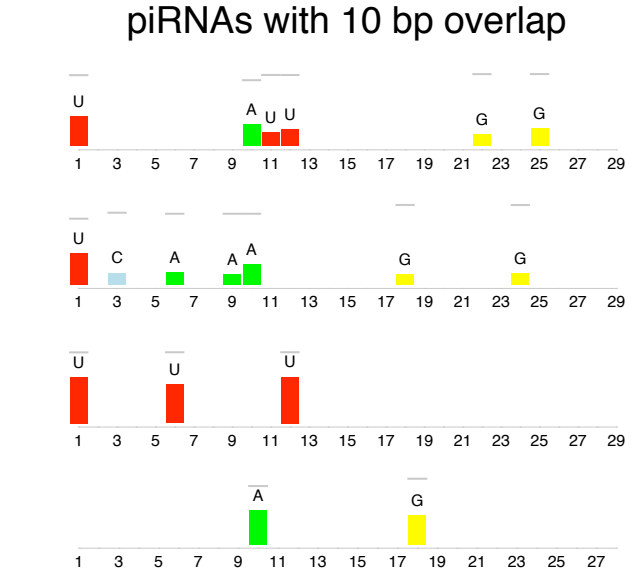**C**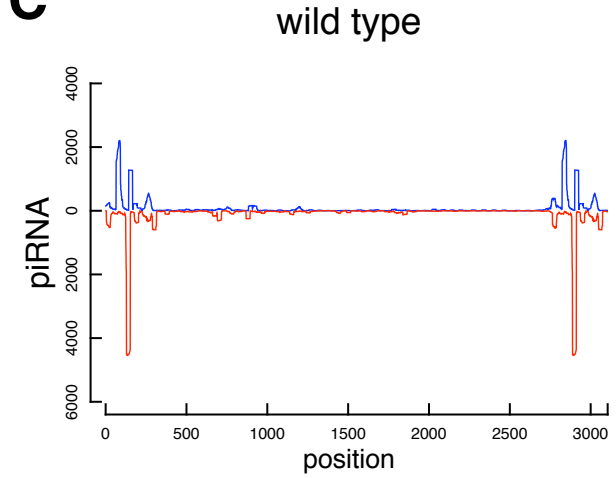**E**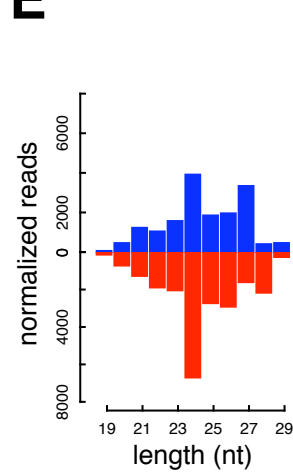**G**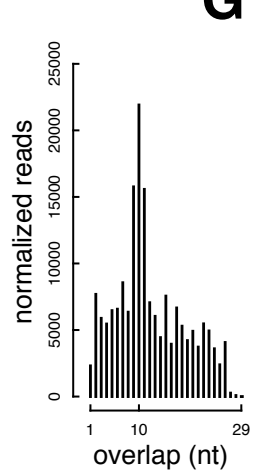**D**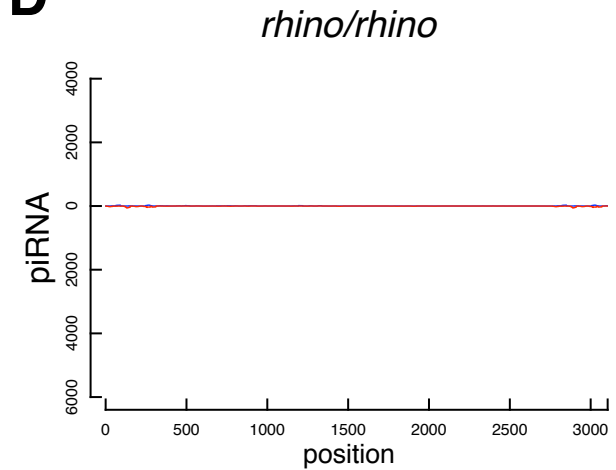**F**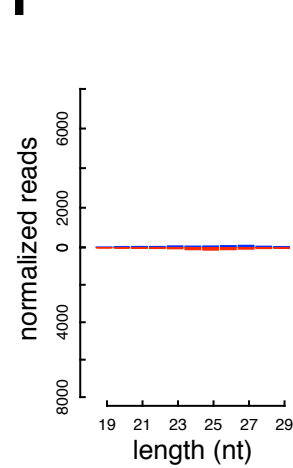**H**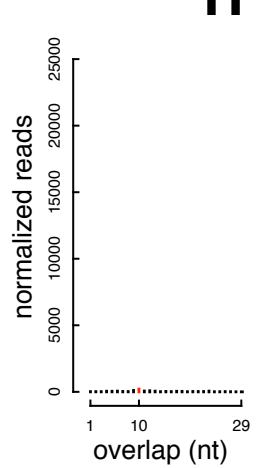

# lvk

## A

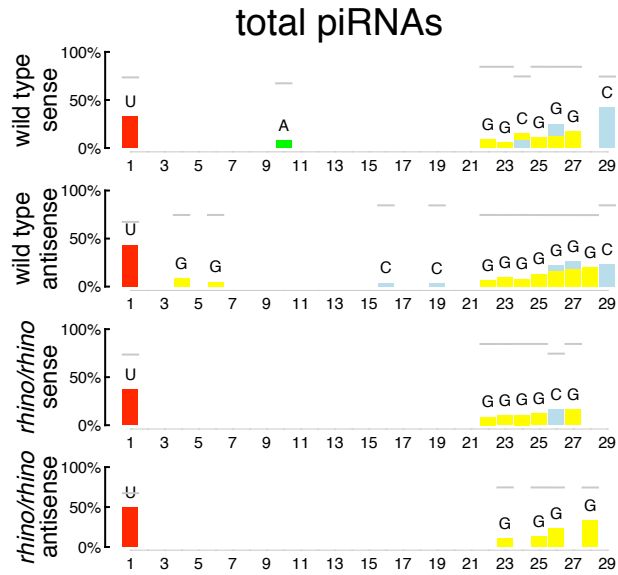

## B

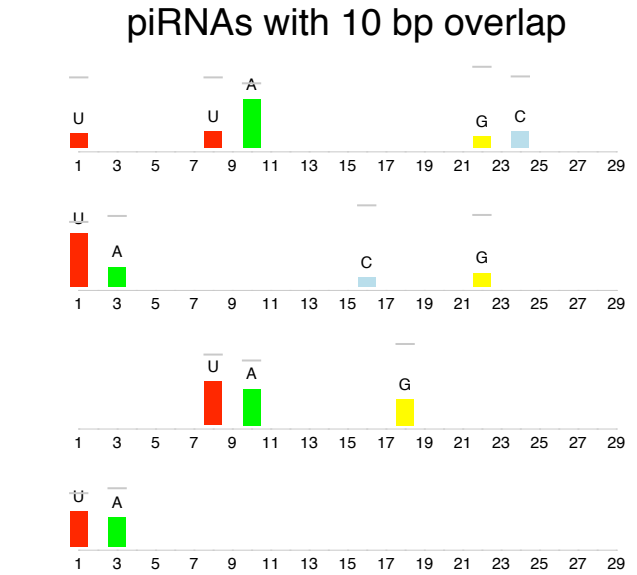

## C

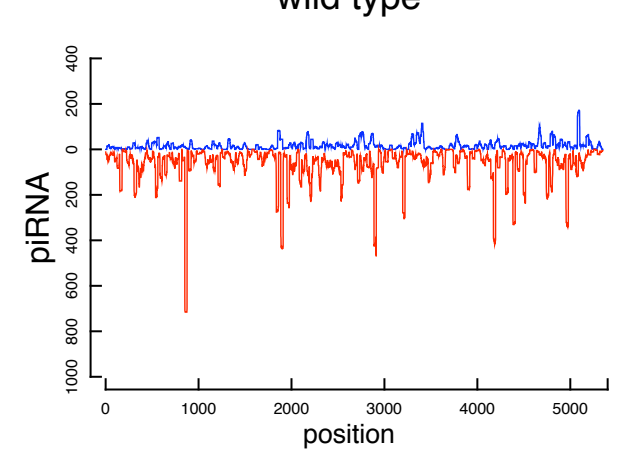

## E

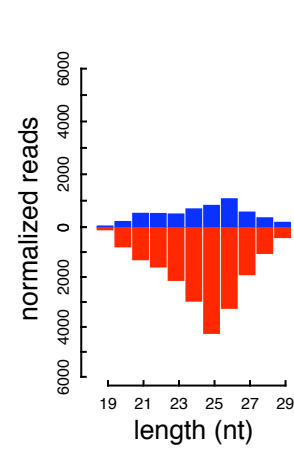

## G

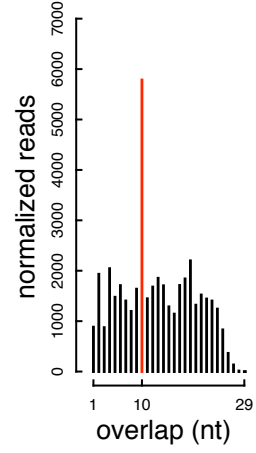

## D

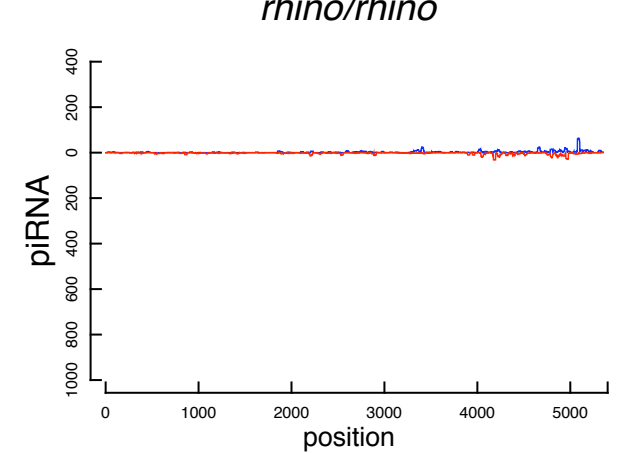

## F

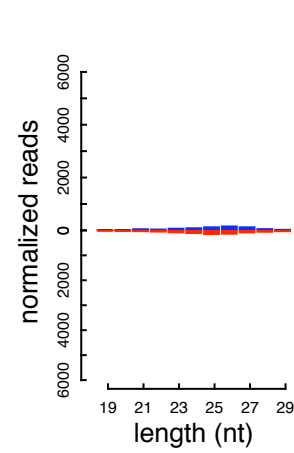

## H

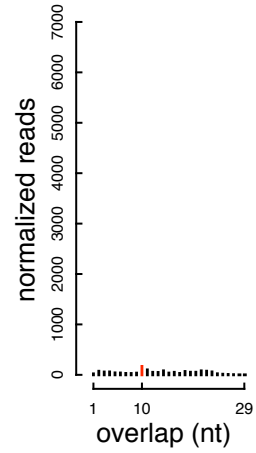

# jockey

**A**

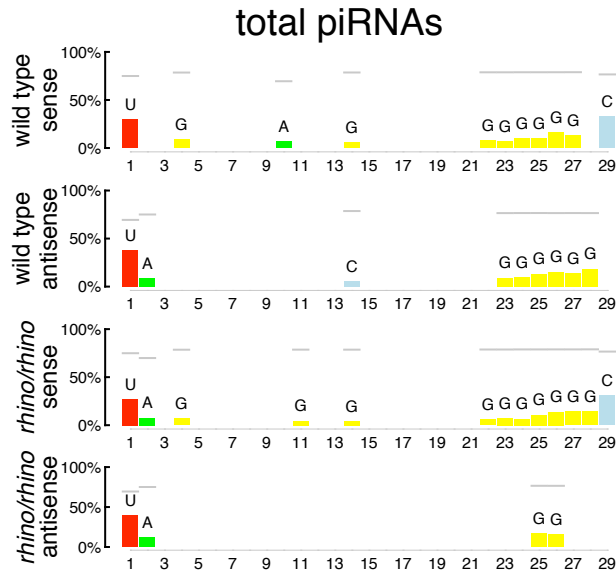

**B**

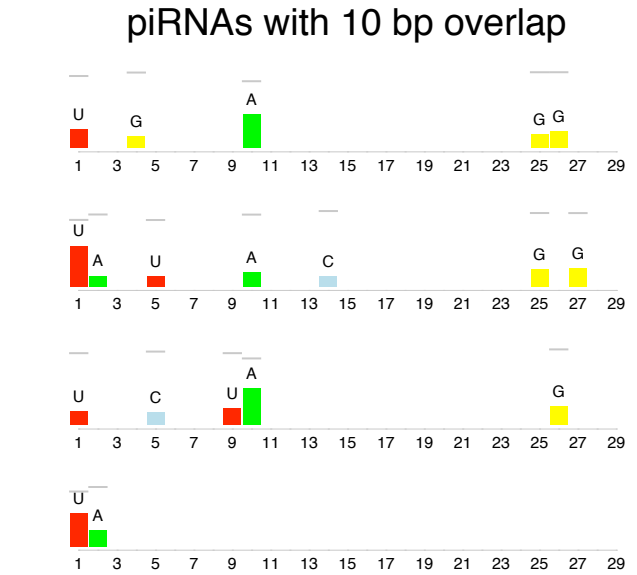

**C**

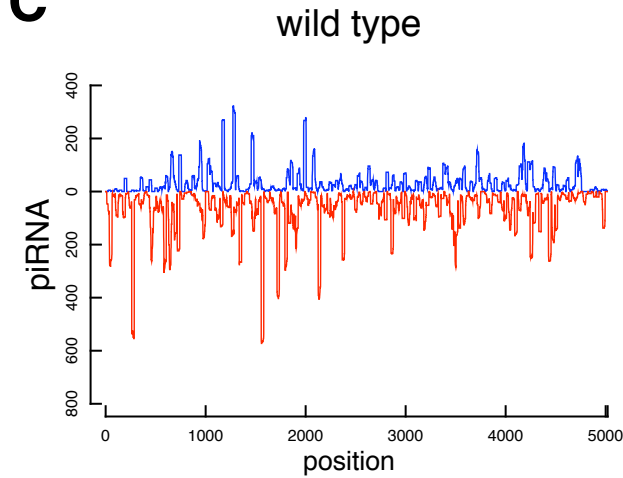

**E**

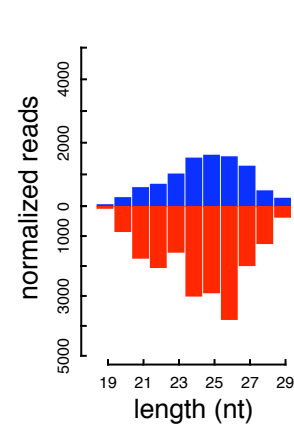

**G**

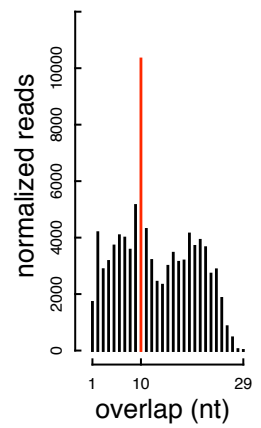

**D**

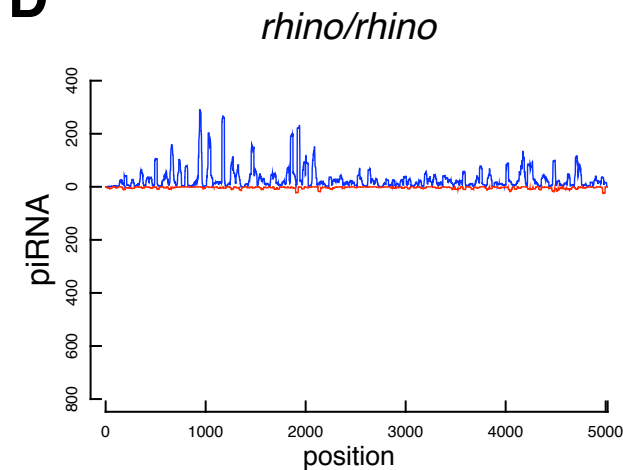

**F**

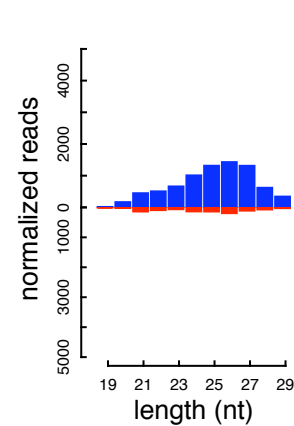

**H**

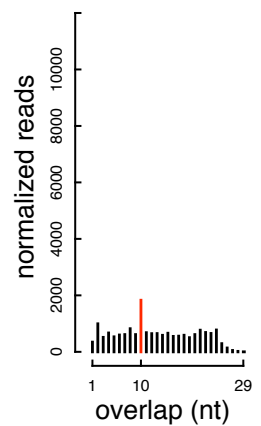

# Juan

**A**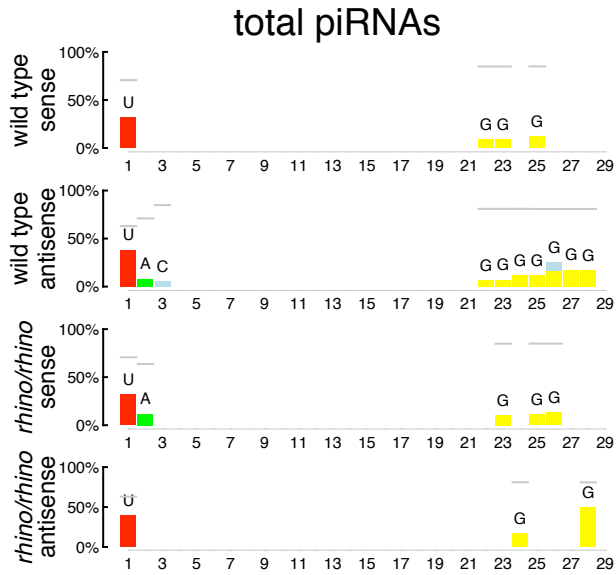**B**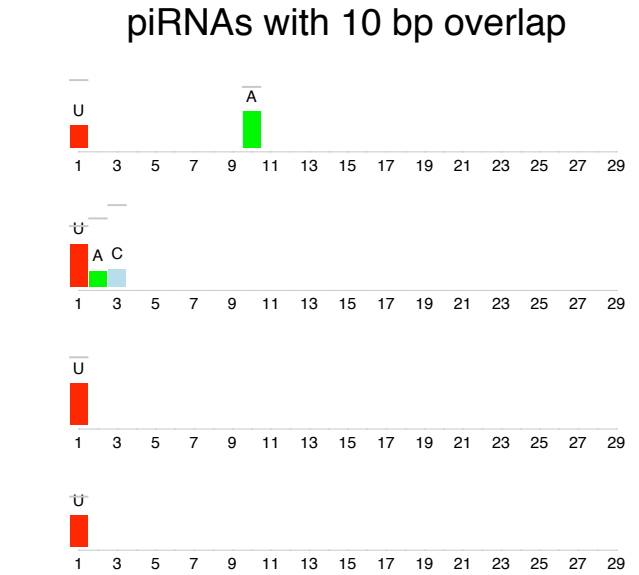**C**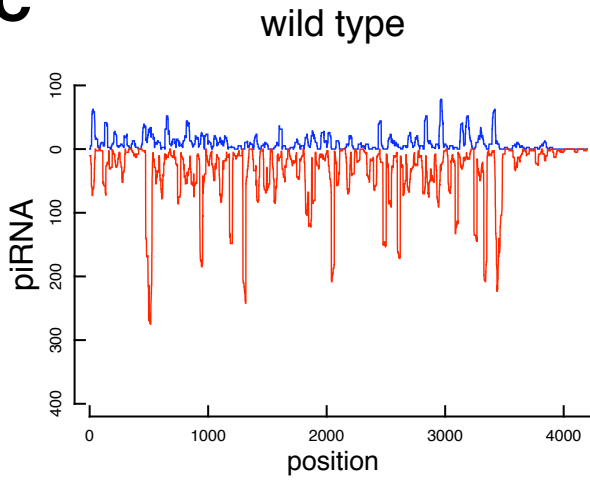**E**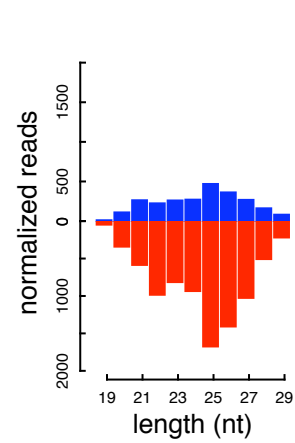**G**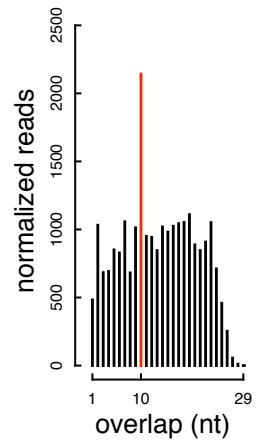**D**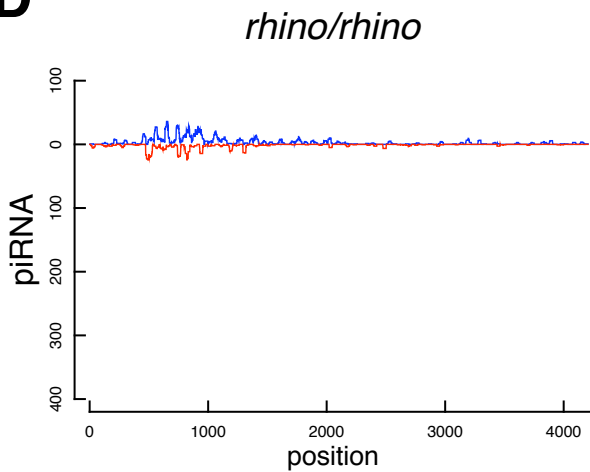**F**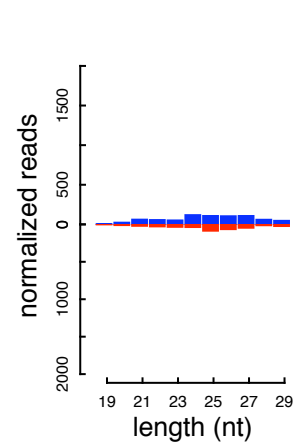**H**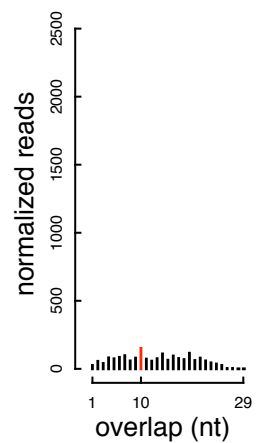

# Max element

**A**

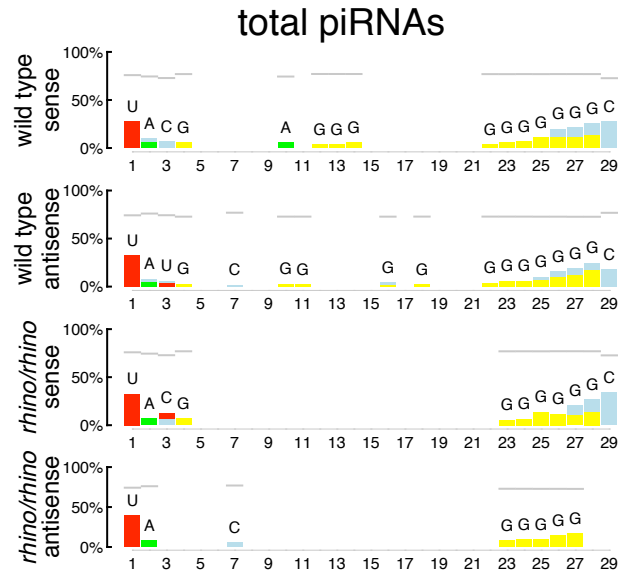

**B**

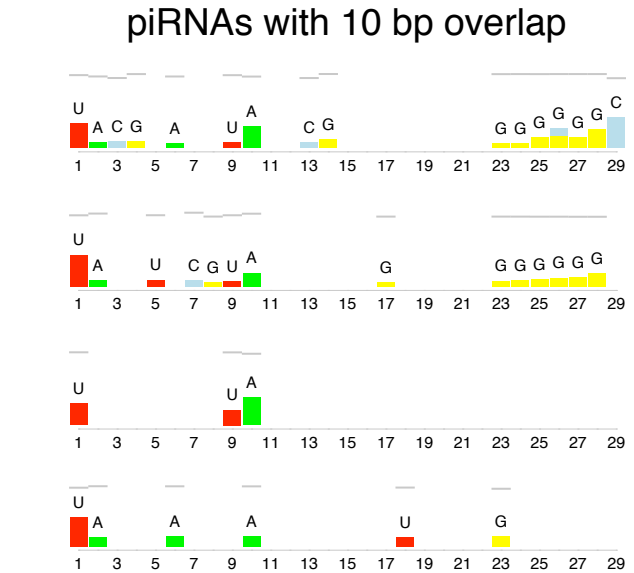

**C**

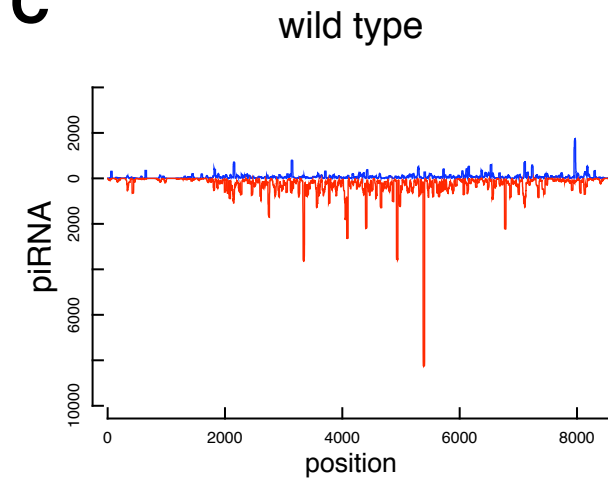

**E**

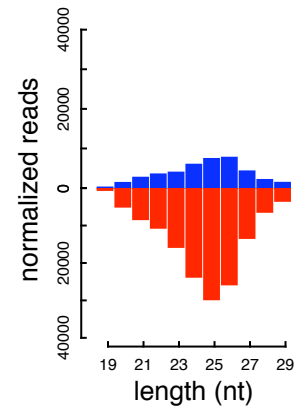

**G**

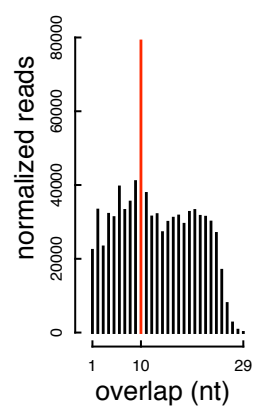

**D**

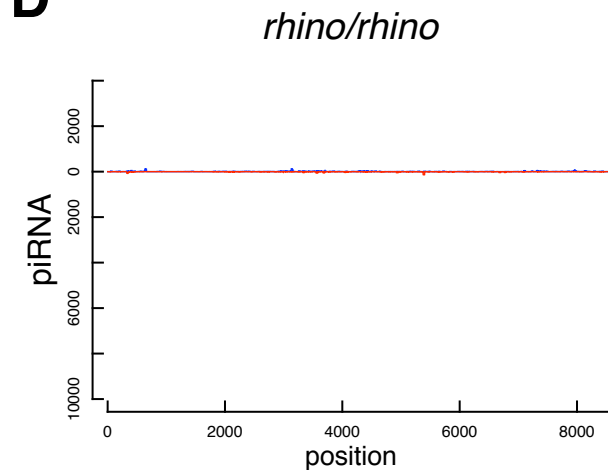

**F**

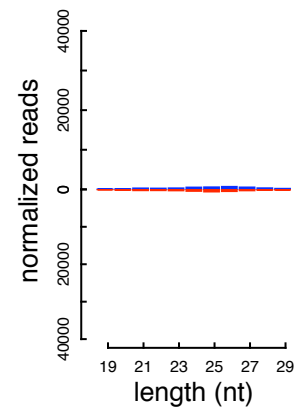

**H**

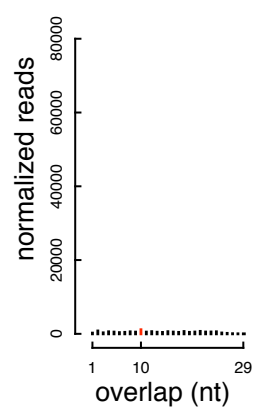

# McClintock

**A**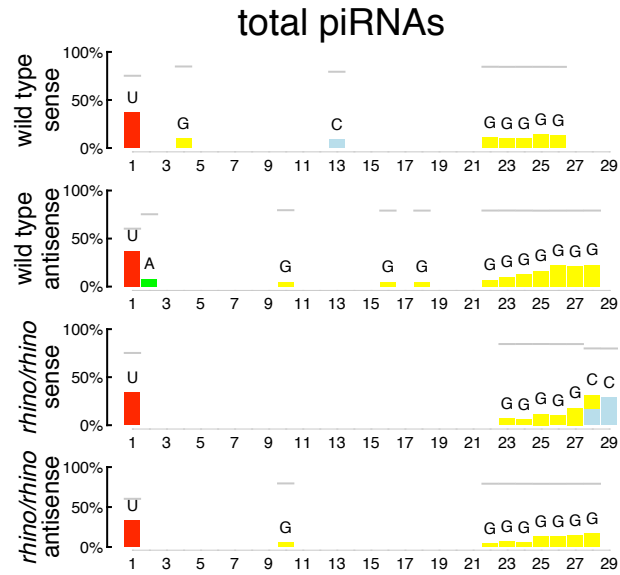**B**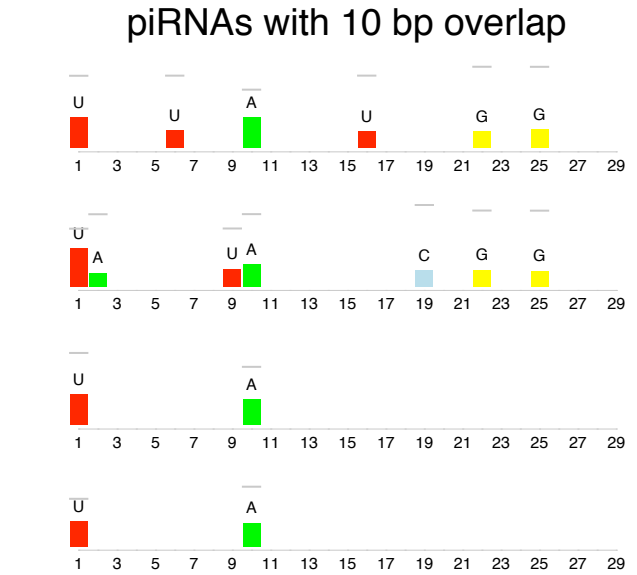**C**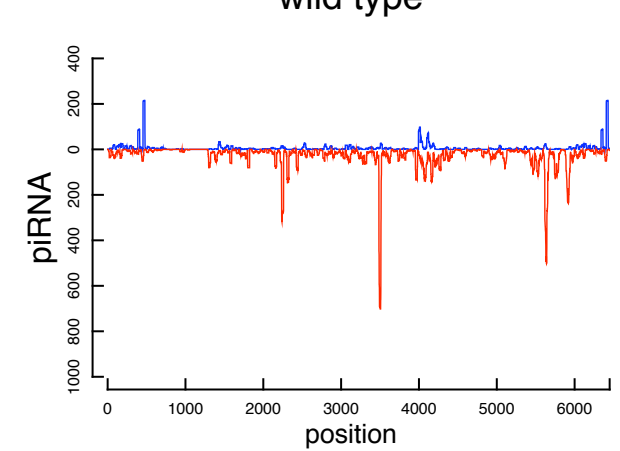**E**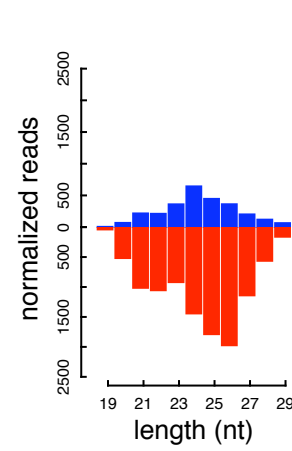**G**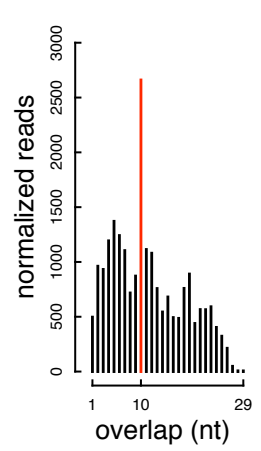**D**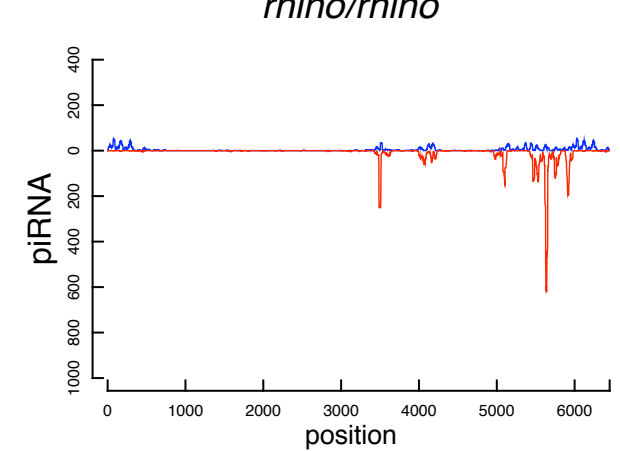**F**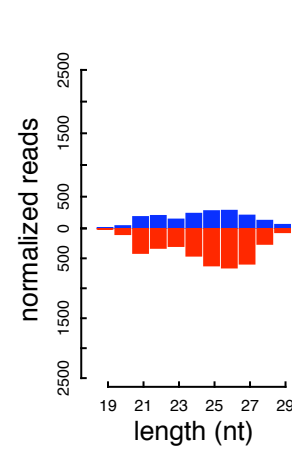**H**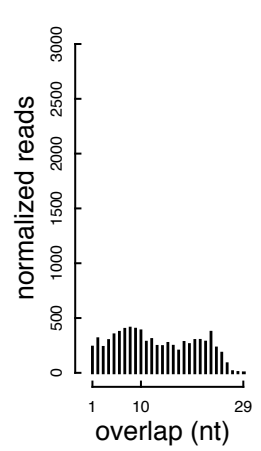



# *mdg1*

**A**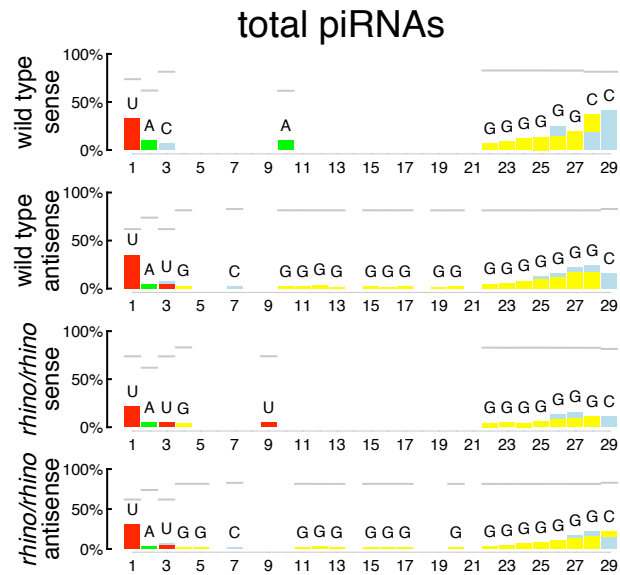**B**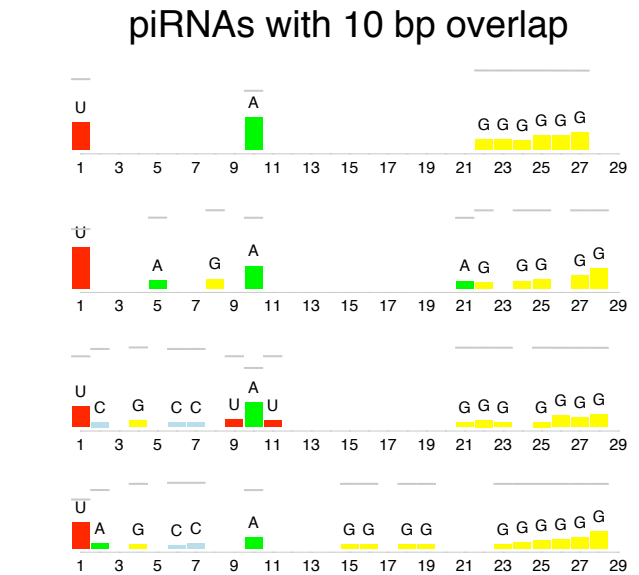**C**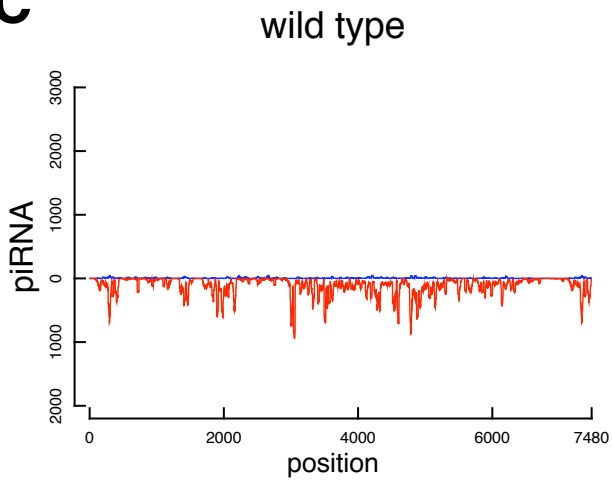**E**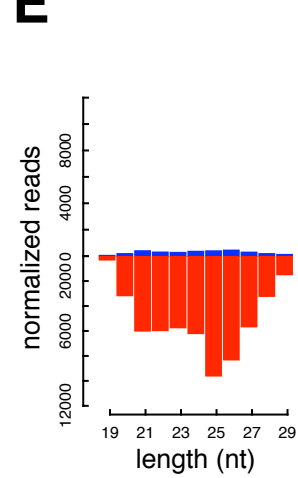**G**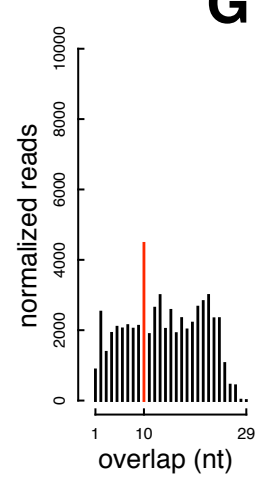**D**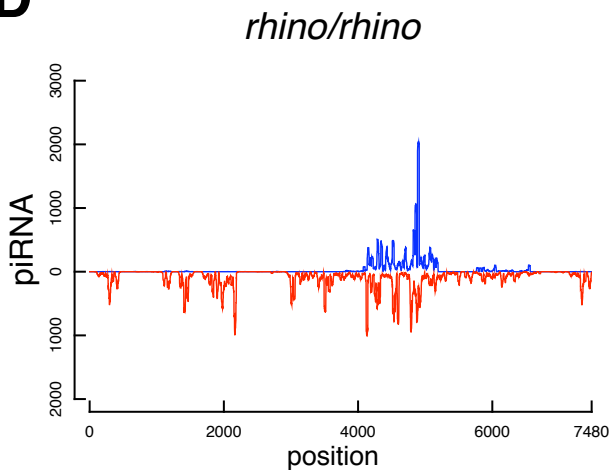**F**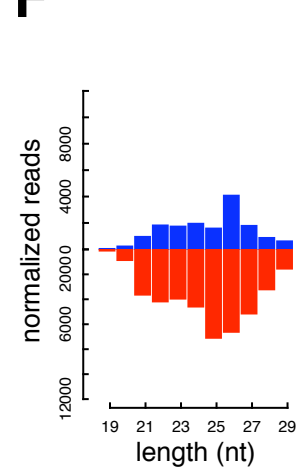**H**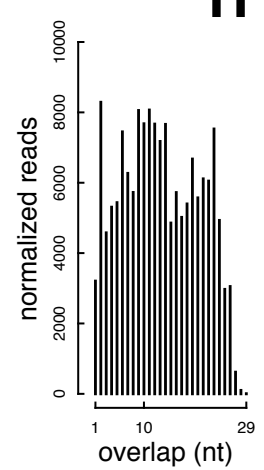

# *mdg3*

**A**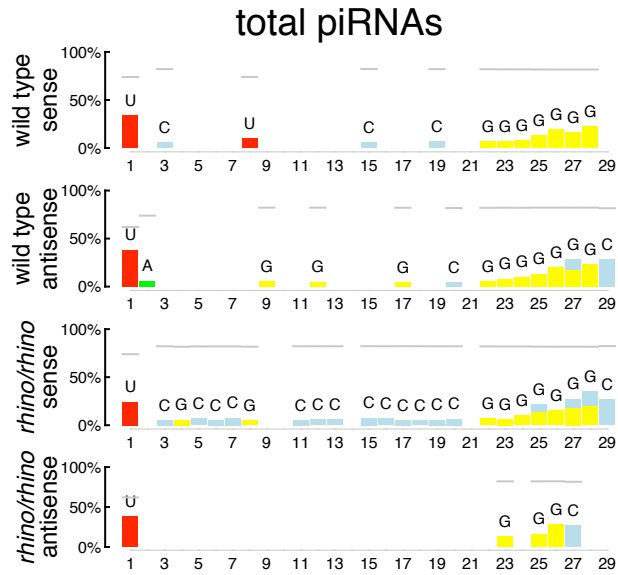**B**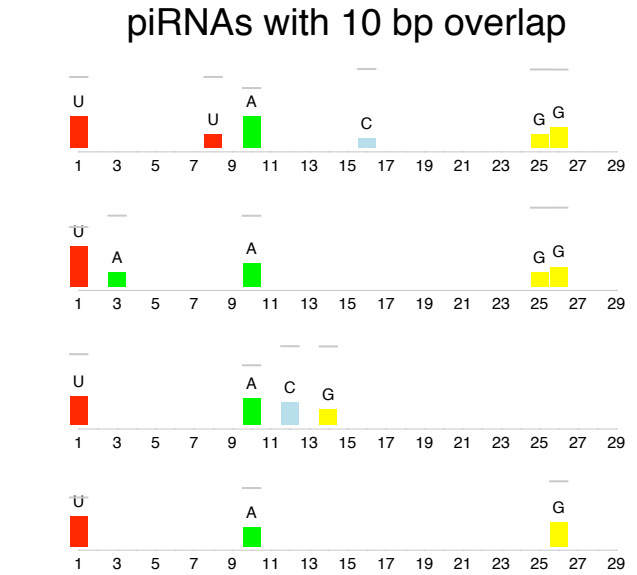**C**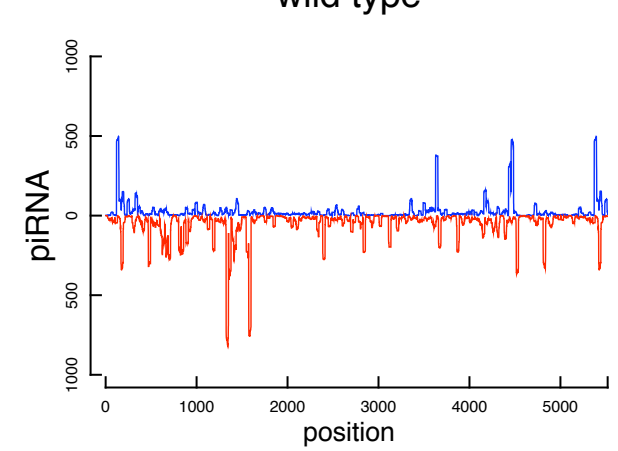**E**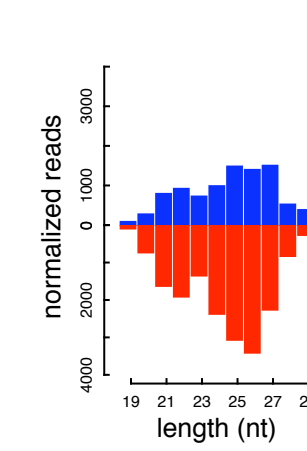**G**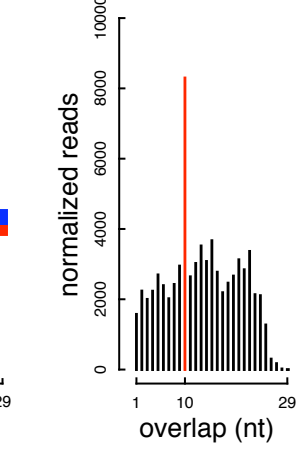**D**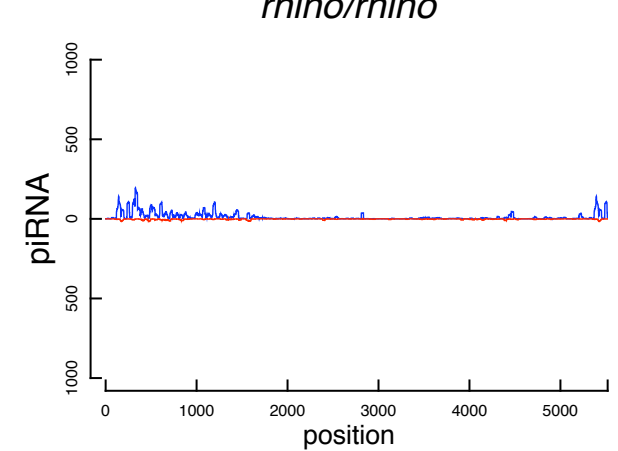**F**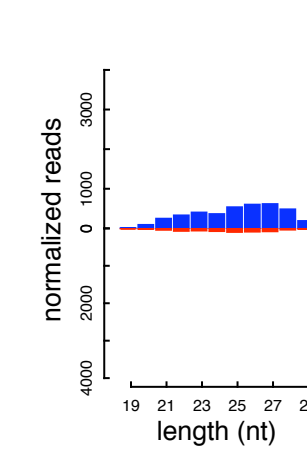**H**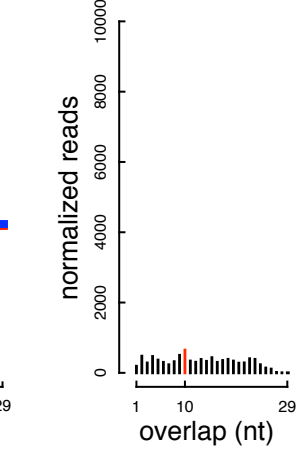

# micropia

**A**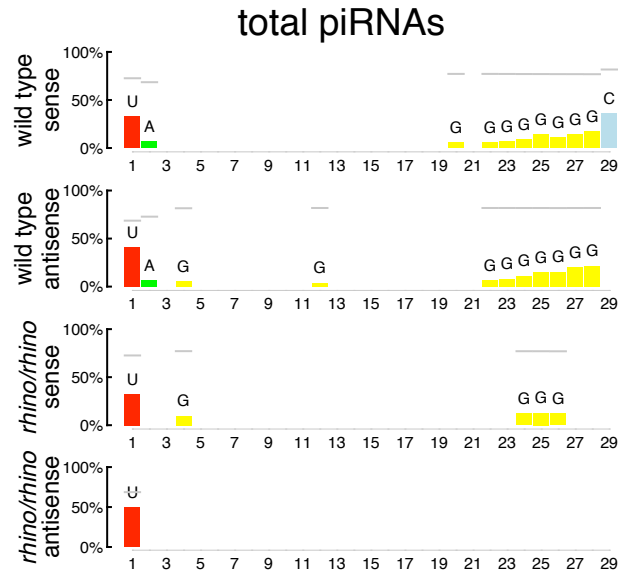**B**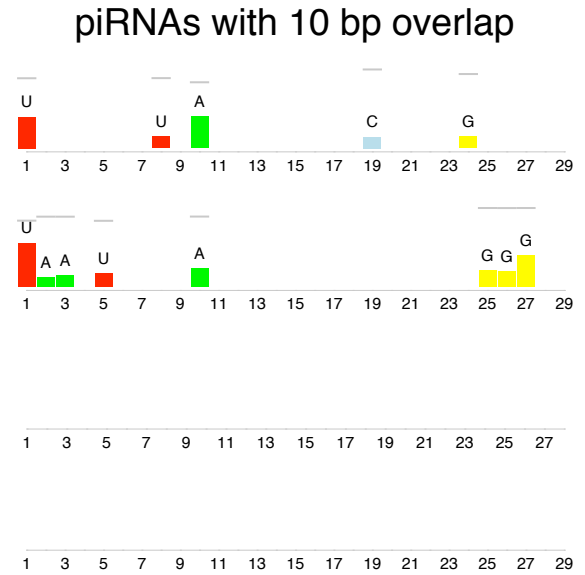**C**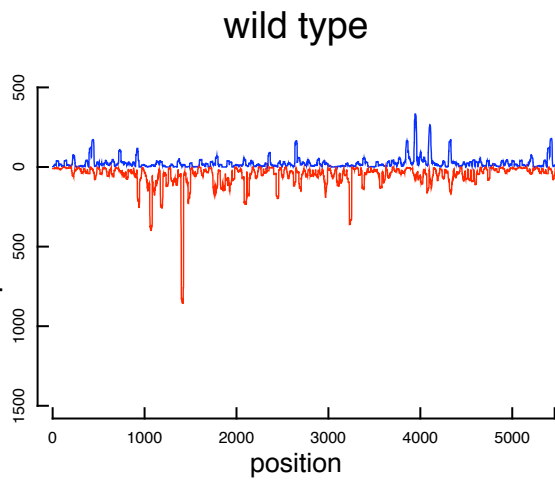**E**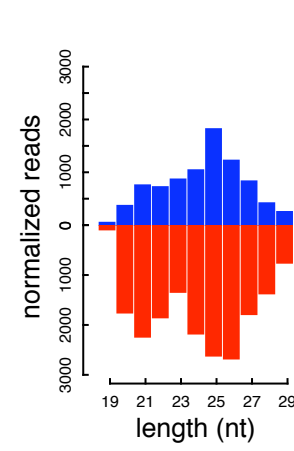**G**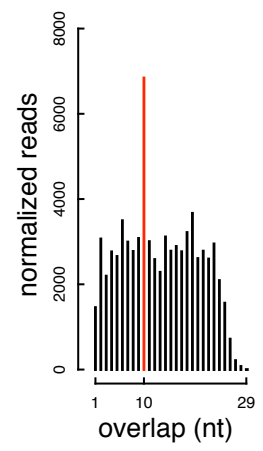**D**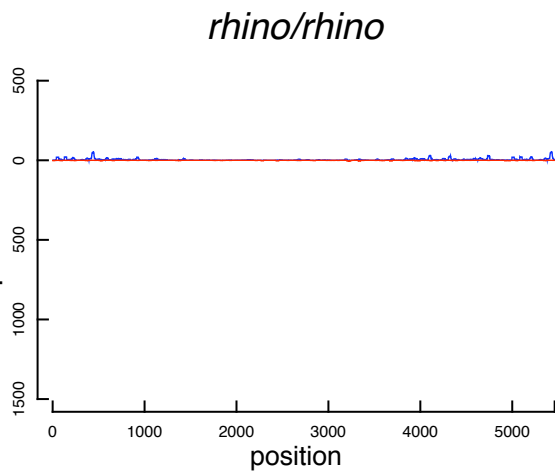**F**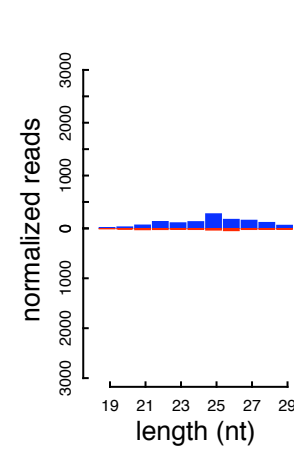**H**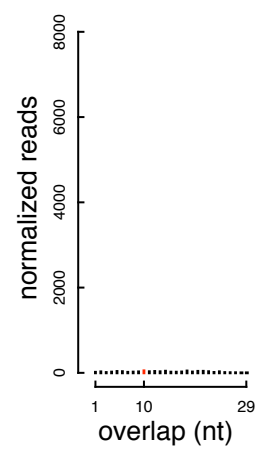

# mst40

**A**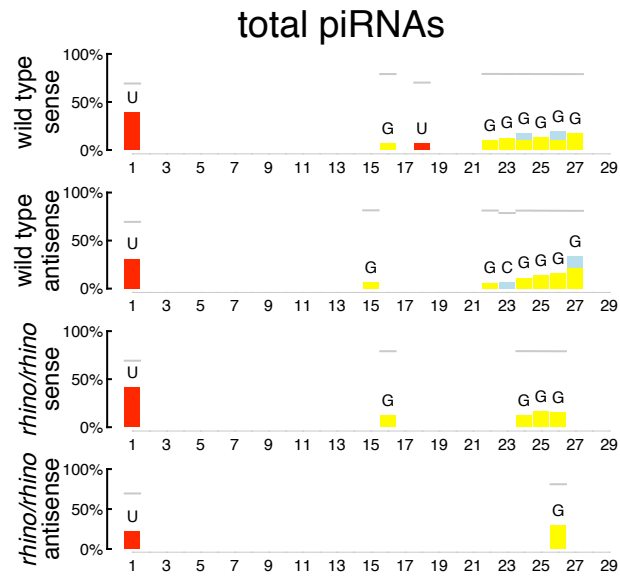**B**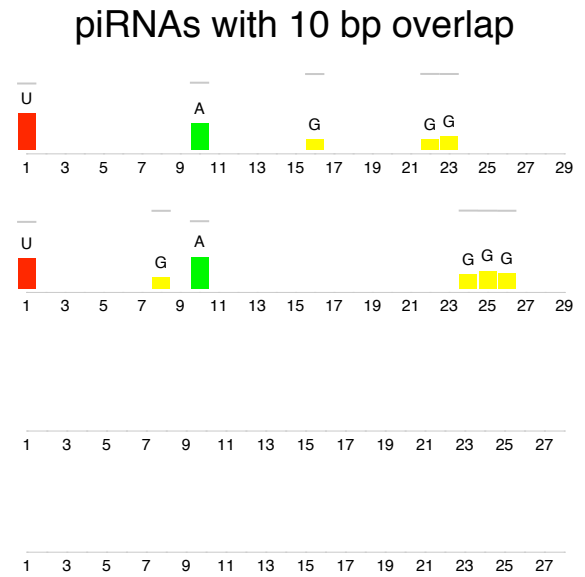**C**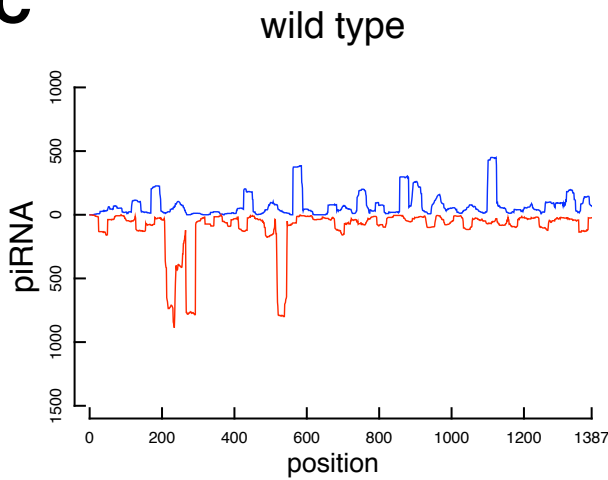**E**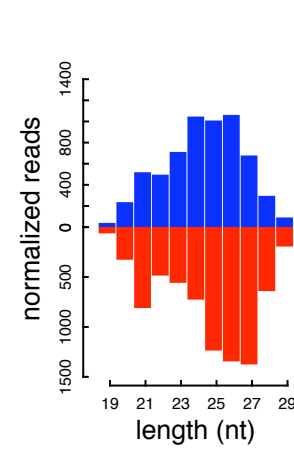**G**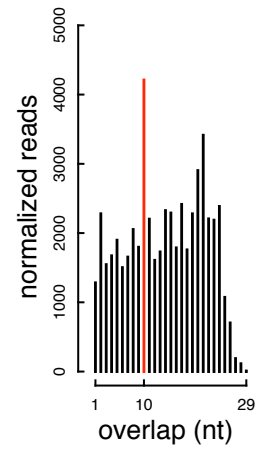**D**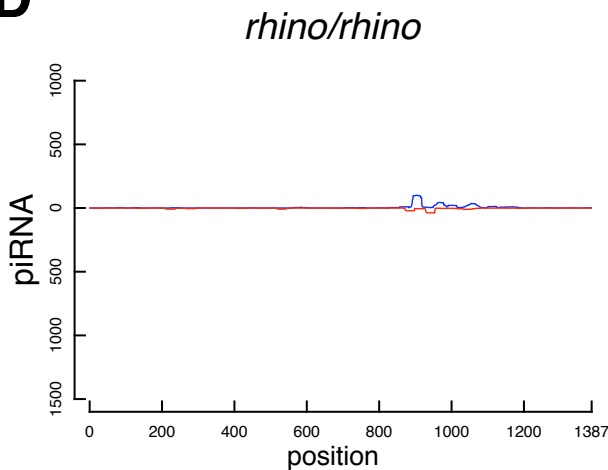**F**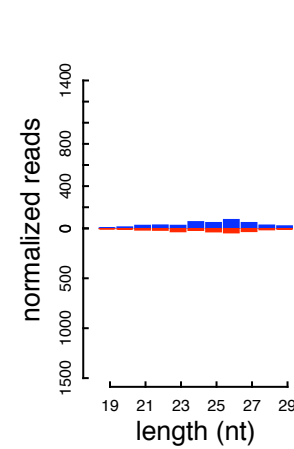**H**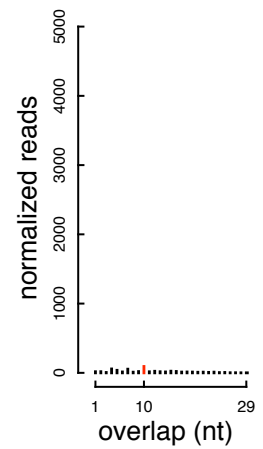

# NOF

**A**

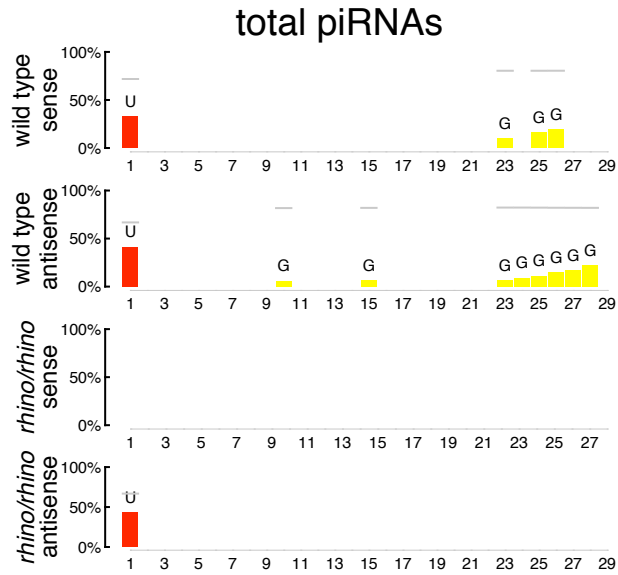

**B**

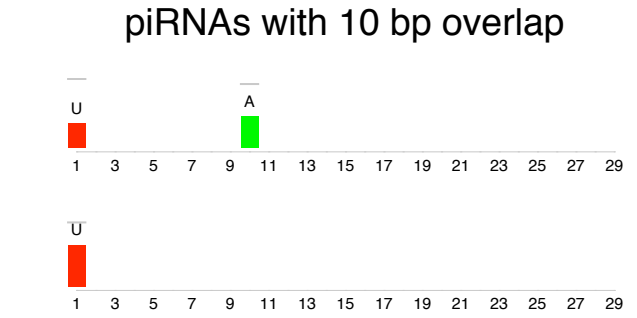

**C**

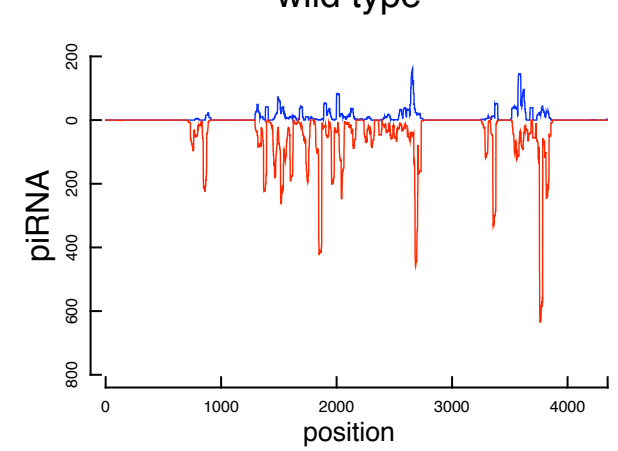

**E**

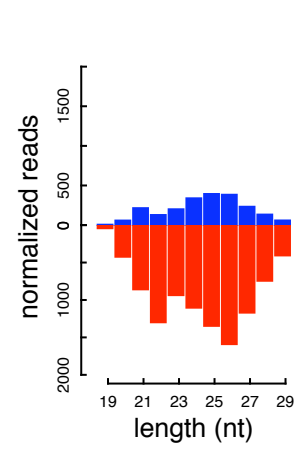

**G**

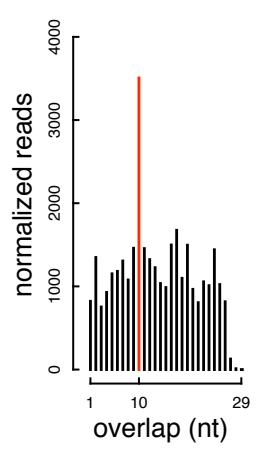

**D**

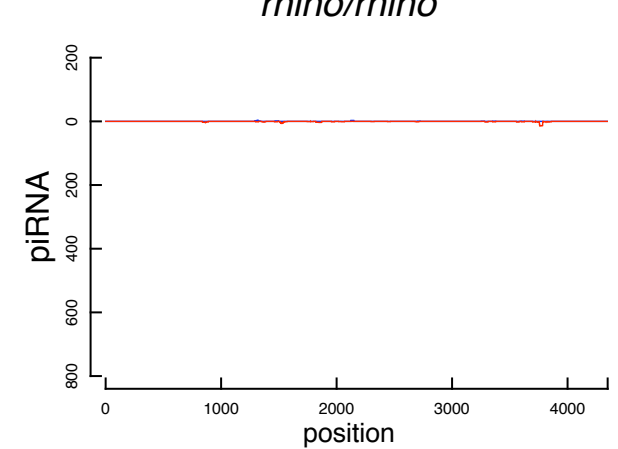

**F**

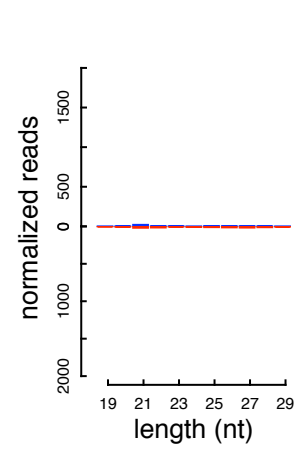

**H**

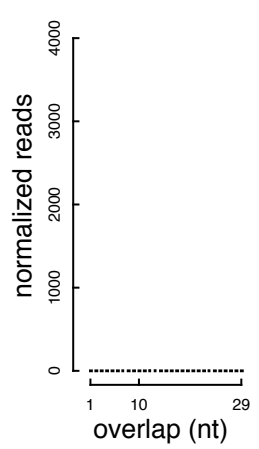

# opus

**A**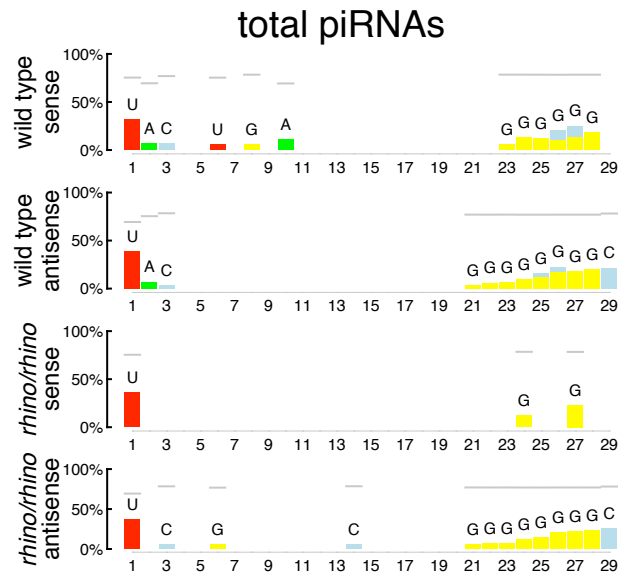**B**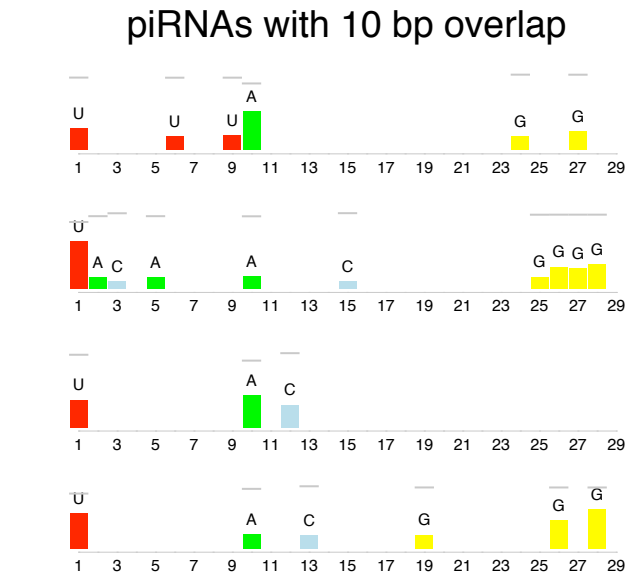**C**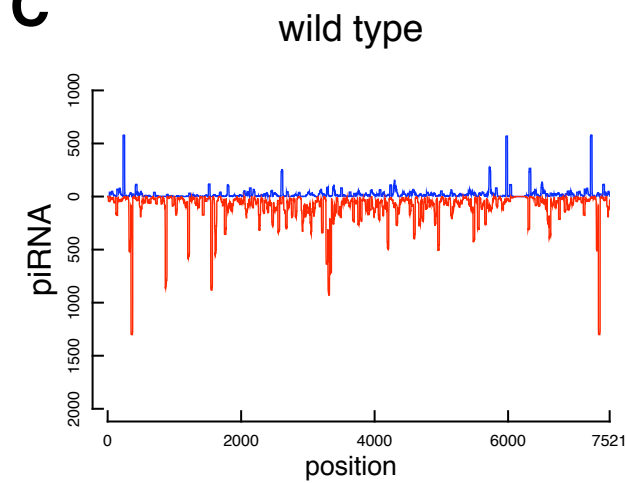**E**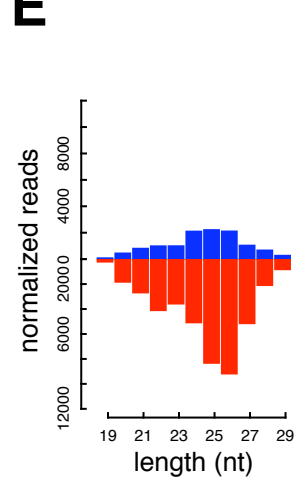**G**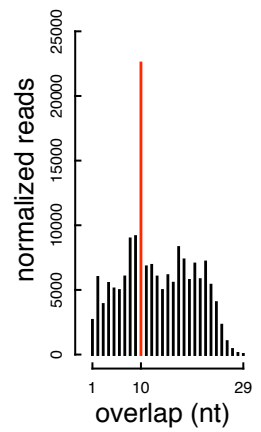**D**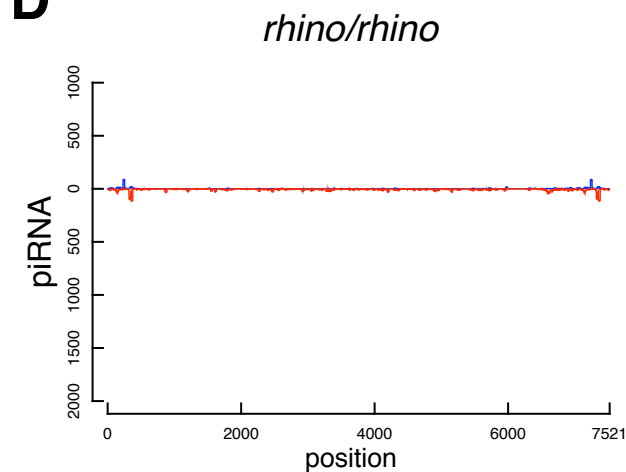**F**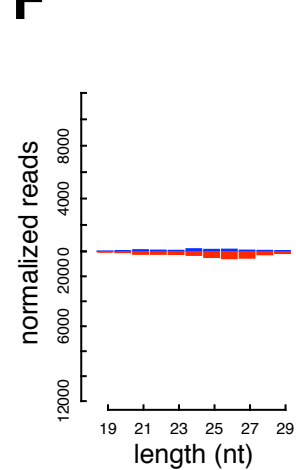**H**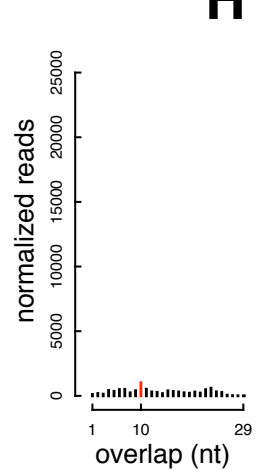

# Osvaldo

**A**

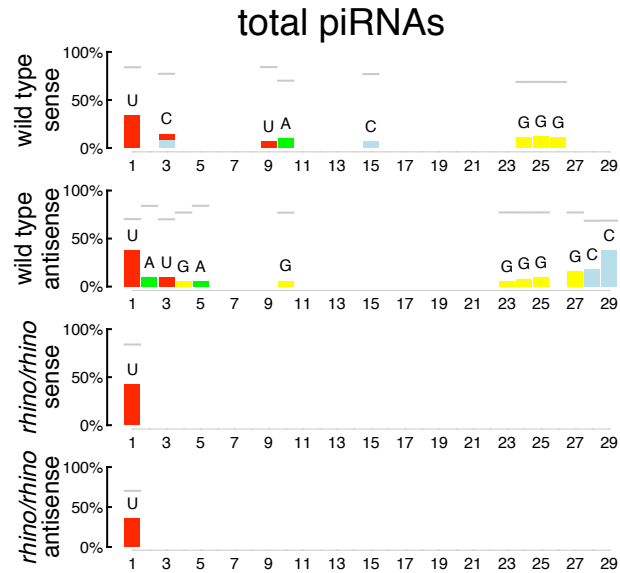

**B**

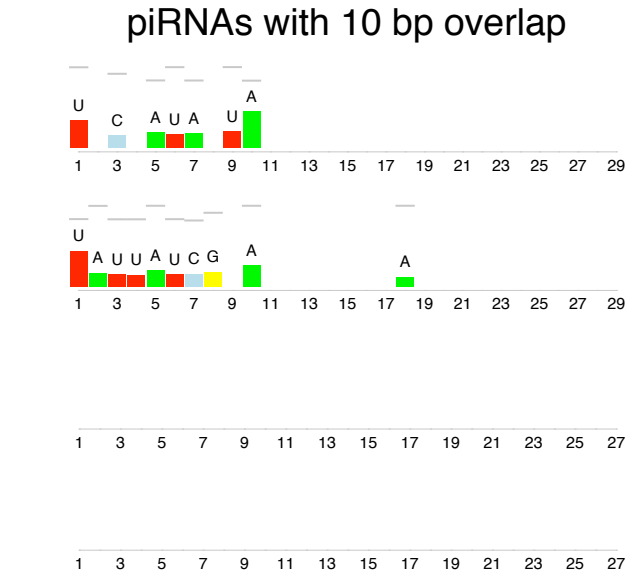

**C**

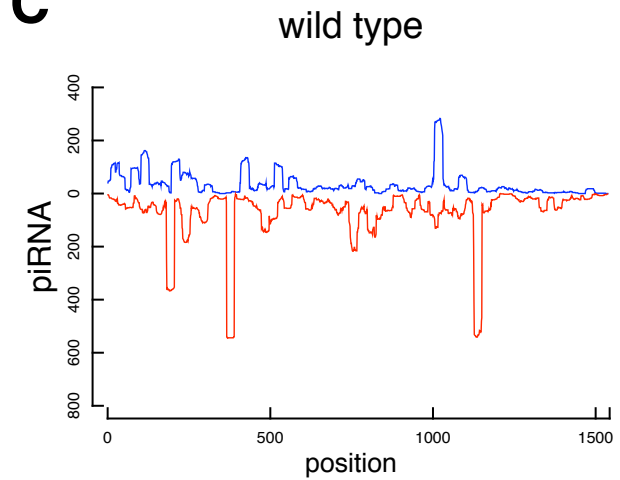

**E**

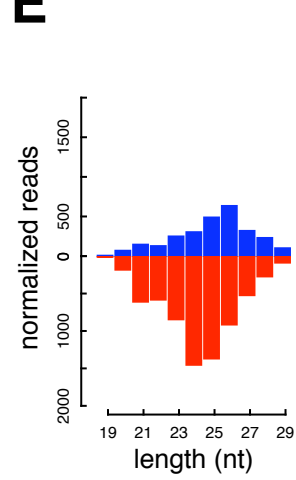

**G**

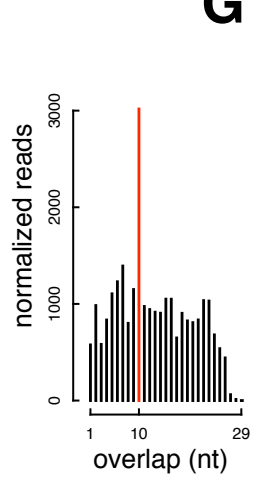

**D**

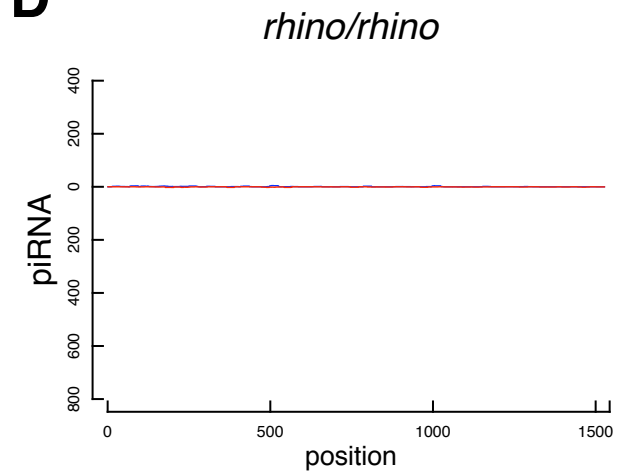

**F**

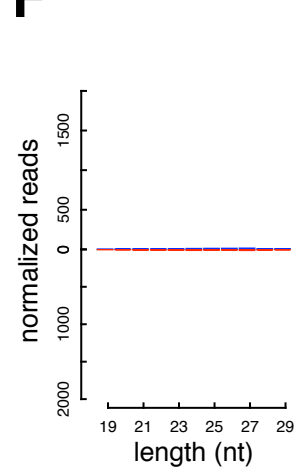

**H**

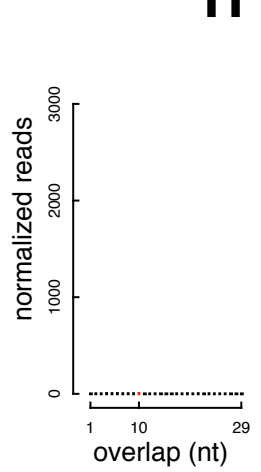

# Porto1

**A**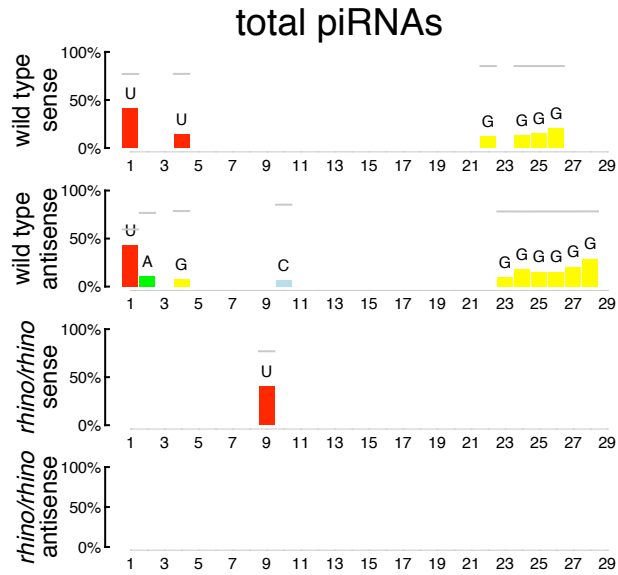**B**

piRNAs with 10 bp overlap

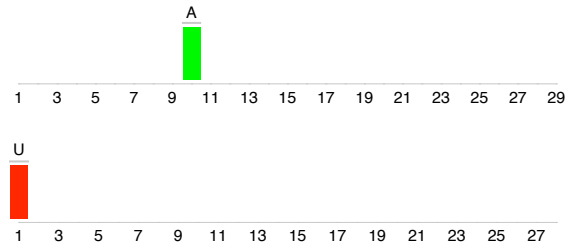**C**

wild type

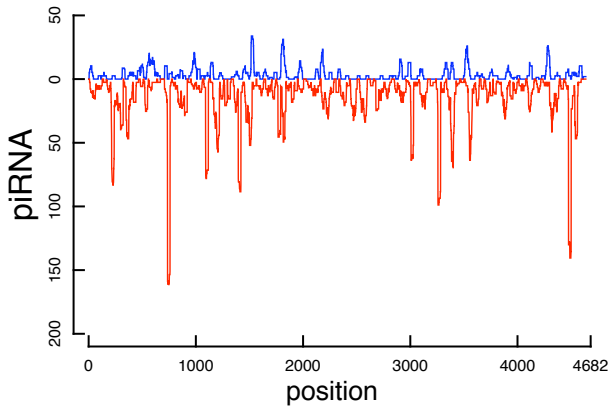**E**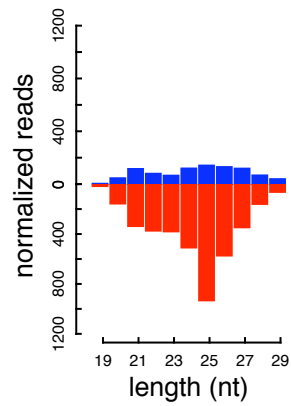**G**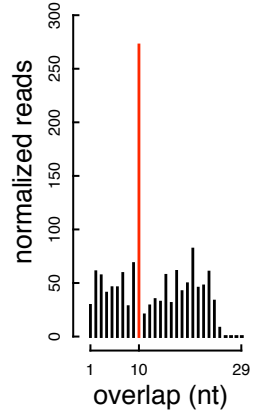**D**

rhino/rhino

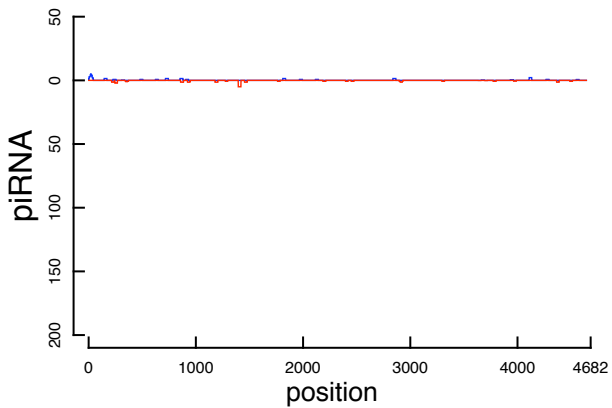**F**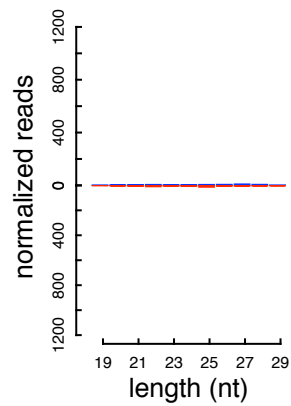**H**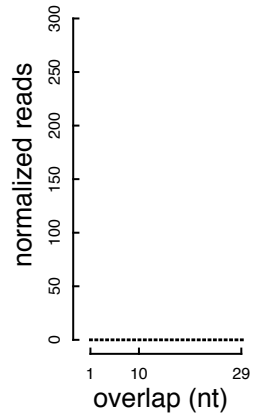



# Q element

**A**

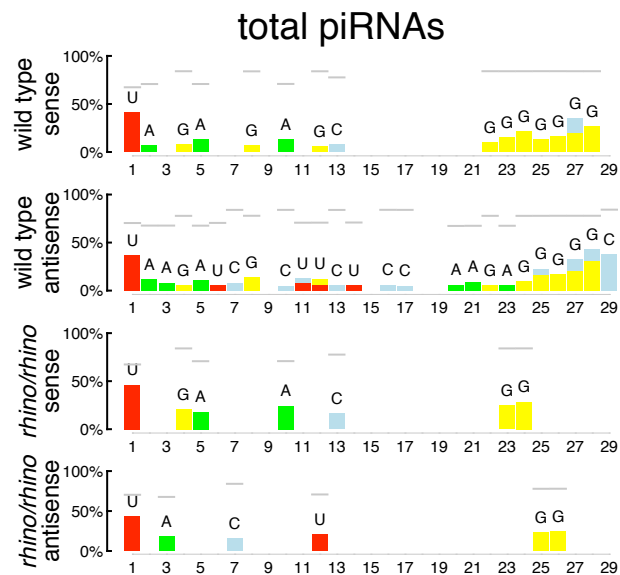

**B**

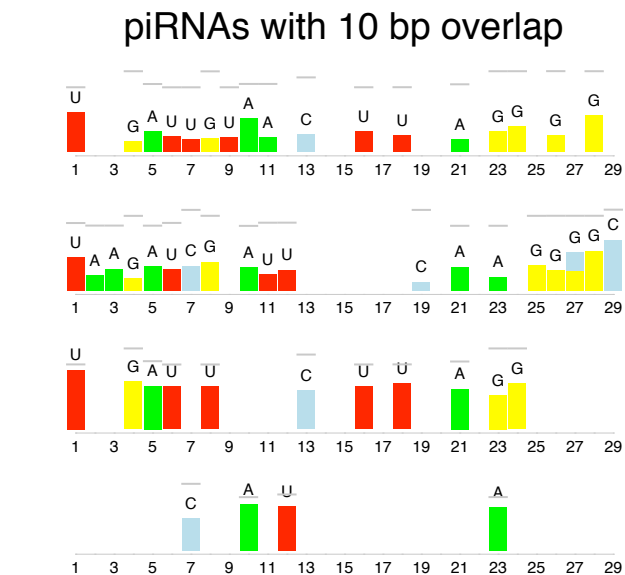

**C**

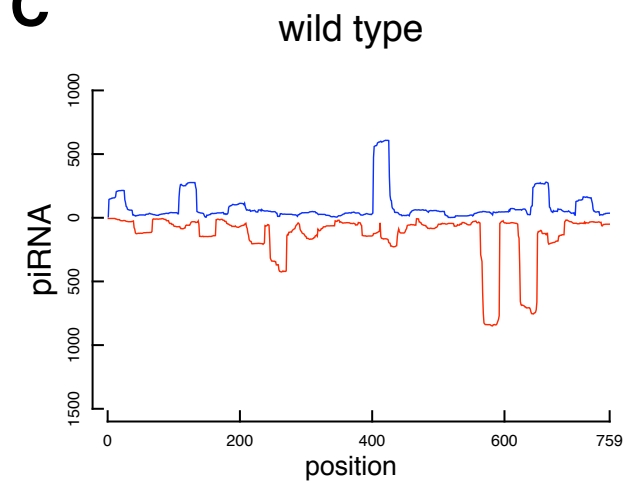

**E**

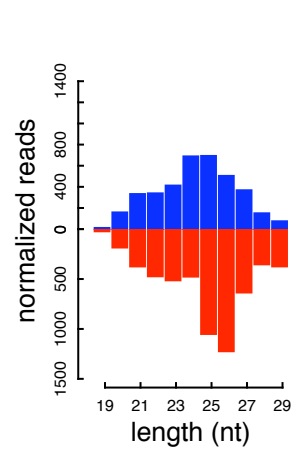

**G**

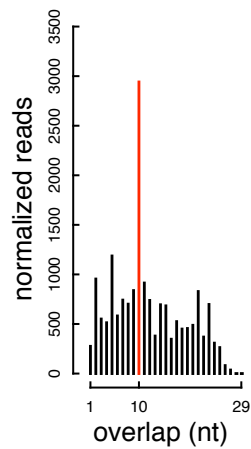

**D**

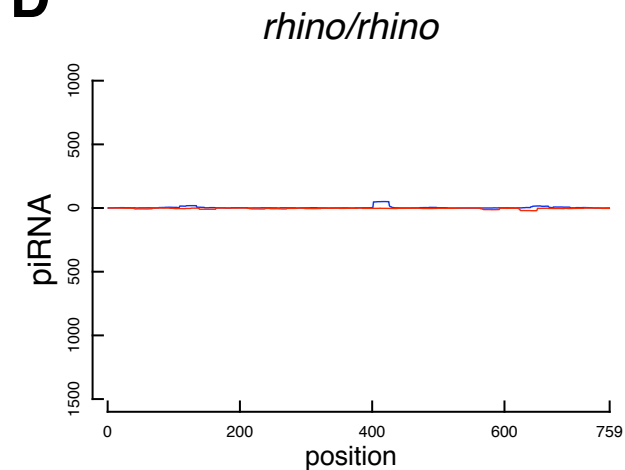

**F**

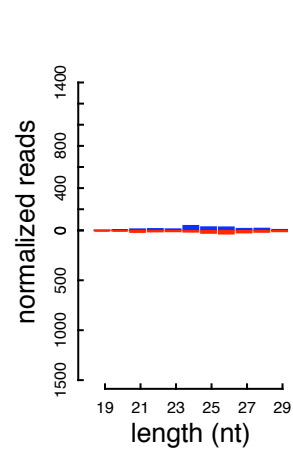

**H**

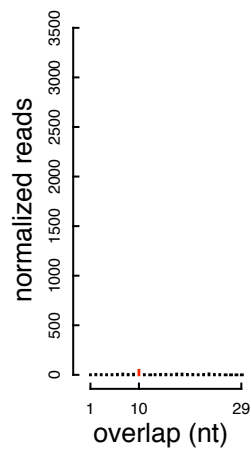

# Quasimodo

**A**

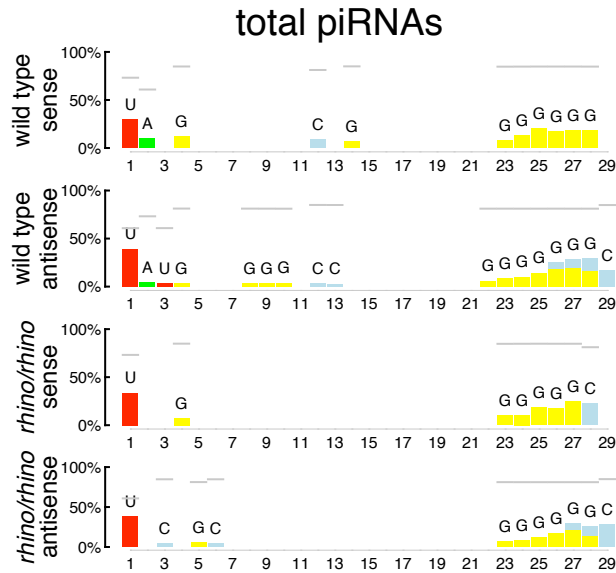

**B**

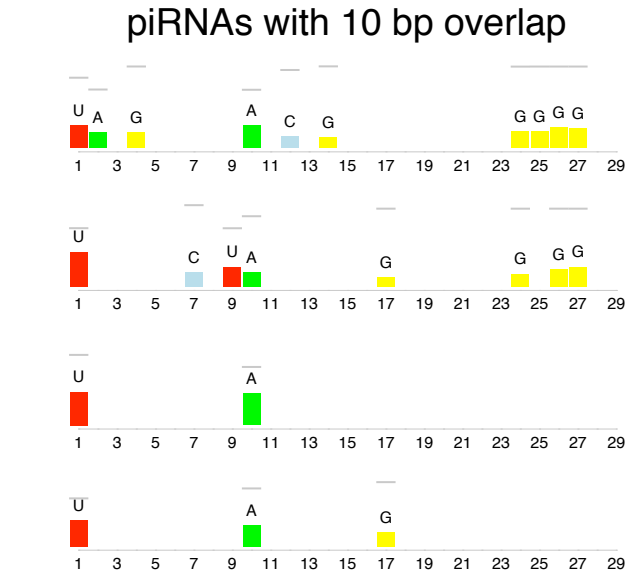

**C**

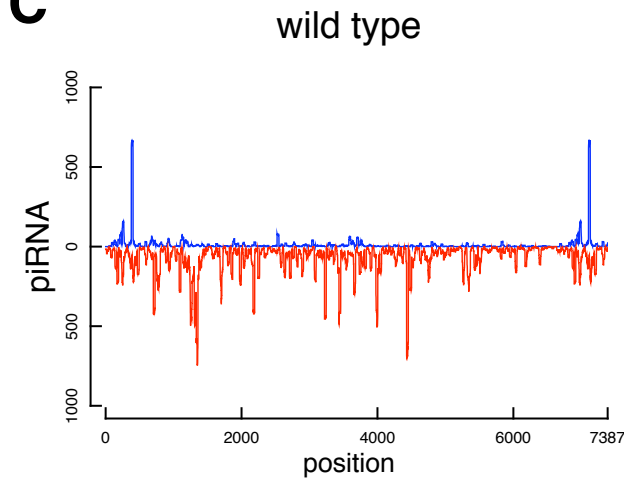

**E**

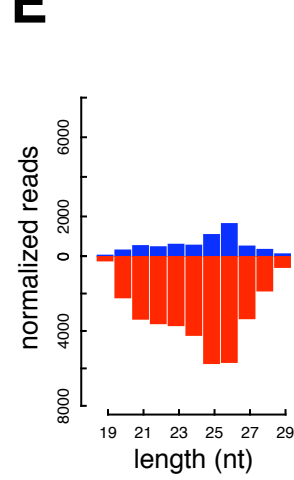

**G**

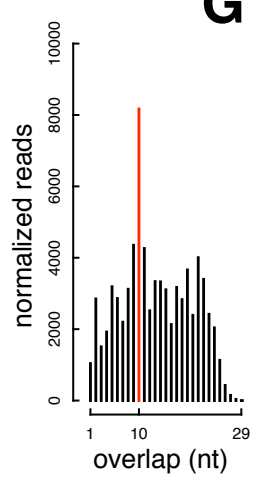

**D**

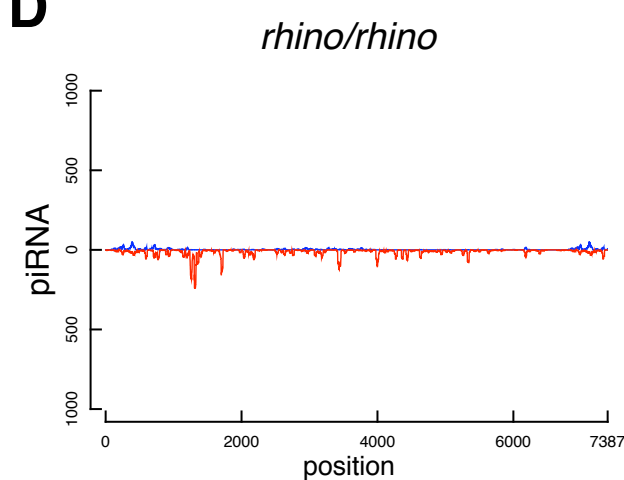

**F**

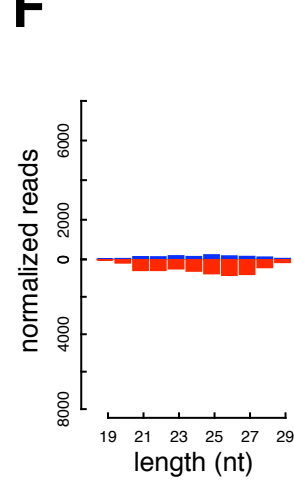

**H**

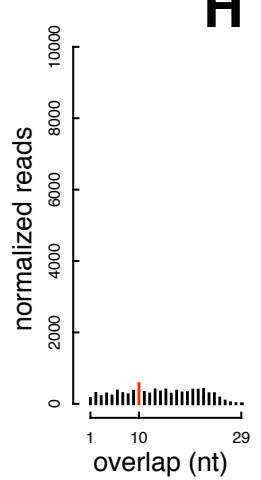

# R1 2

**A**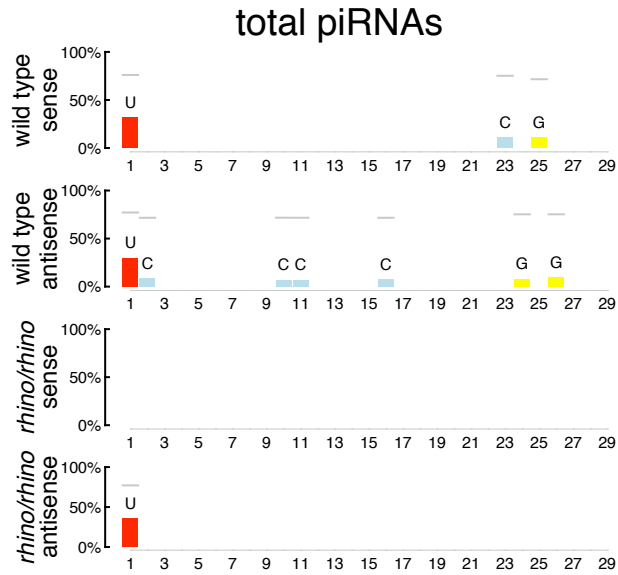**B**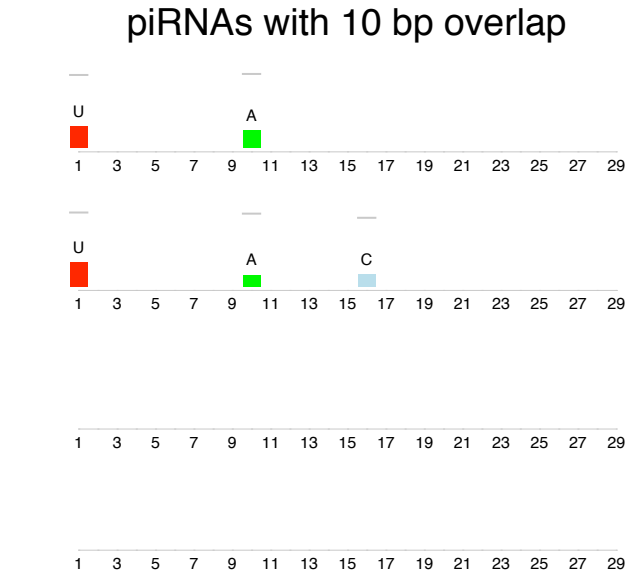**C**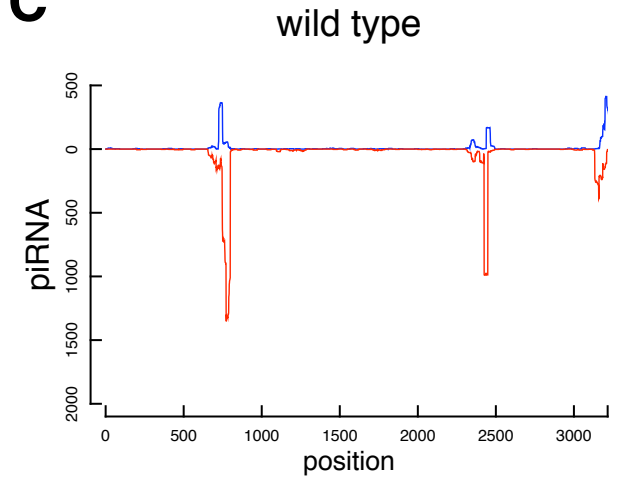**E**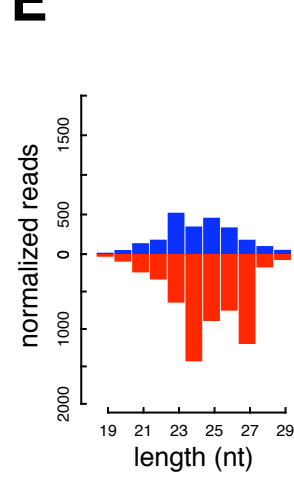**G**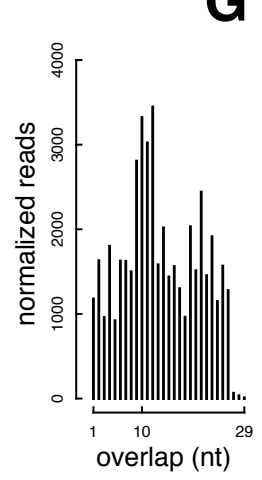**D**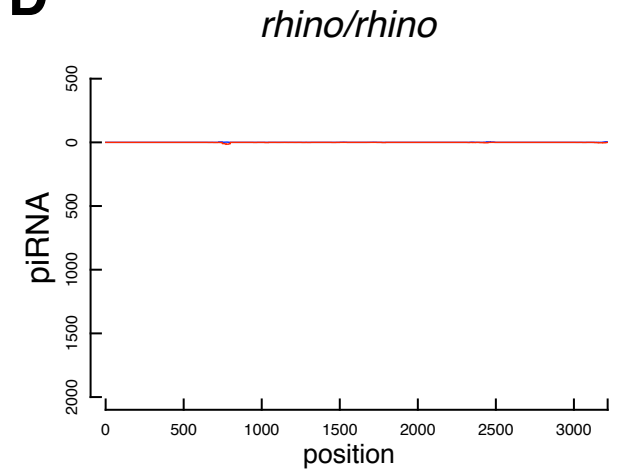**F**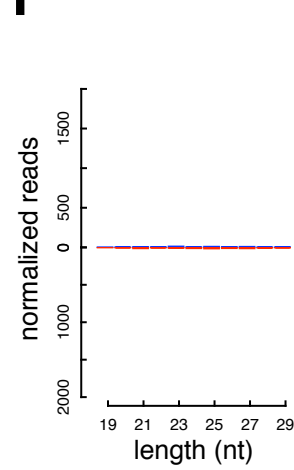**H**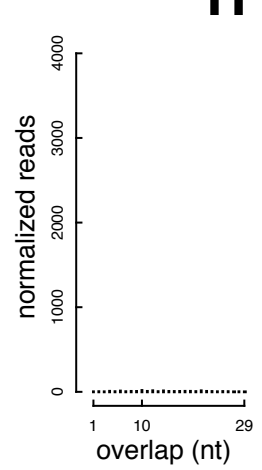

# R1A1 element

**A**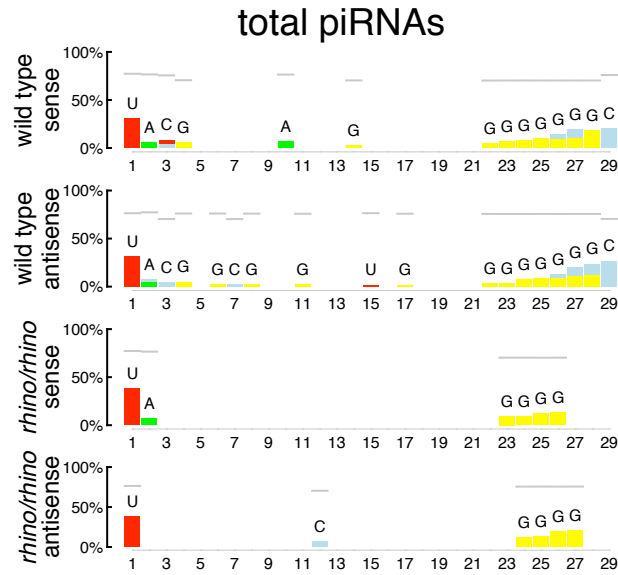**B**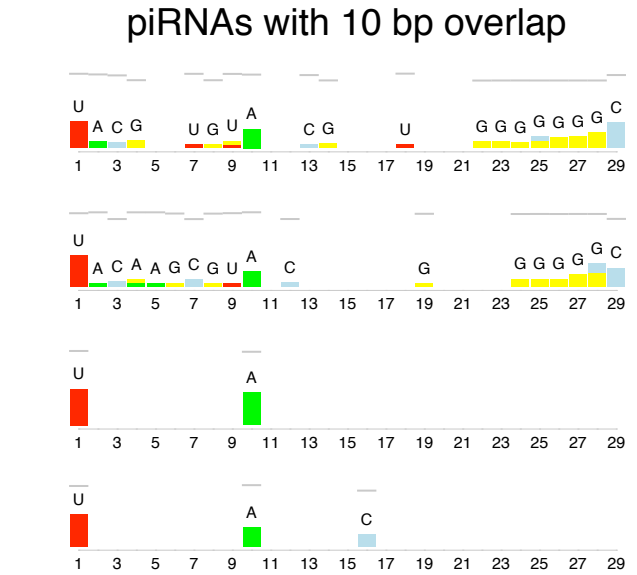**C**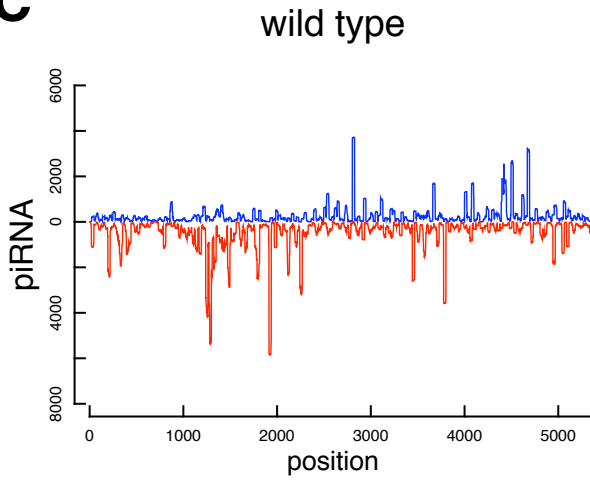**D**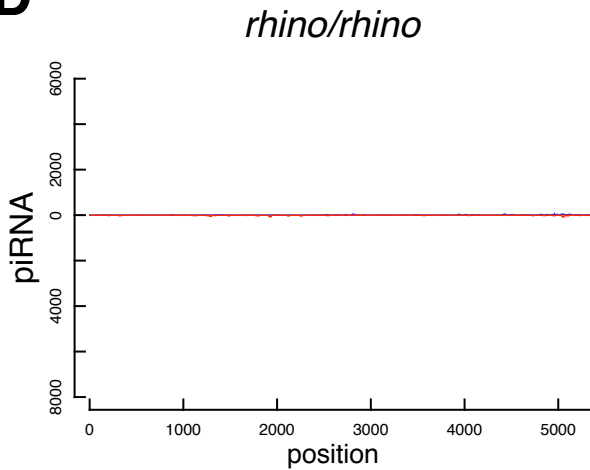**E**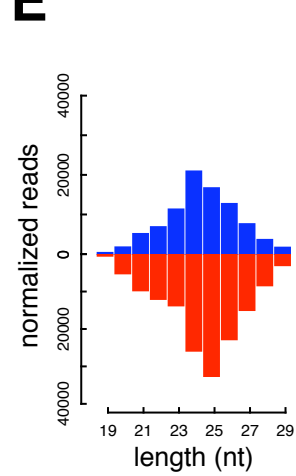**G**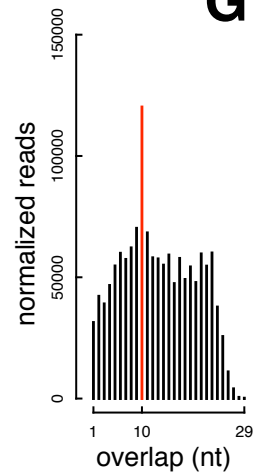**F**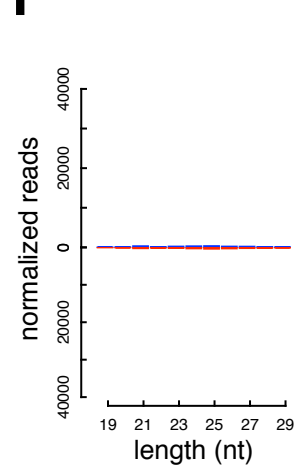**H**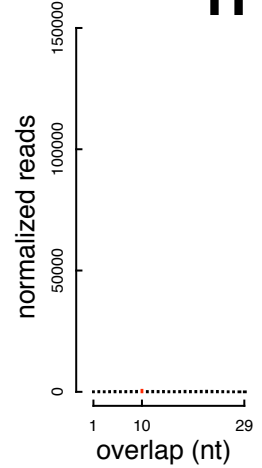

# R2 element

**A**

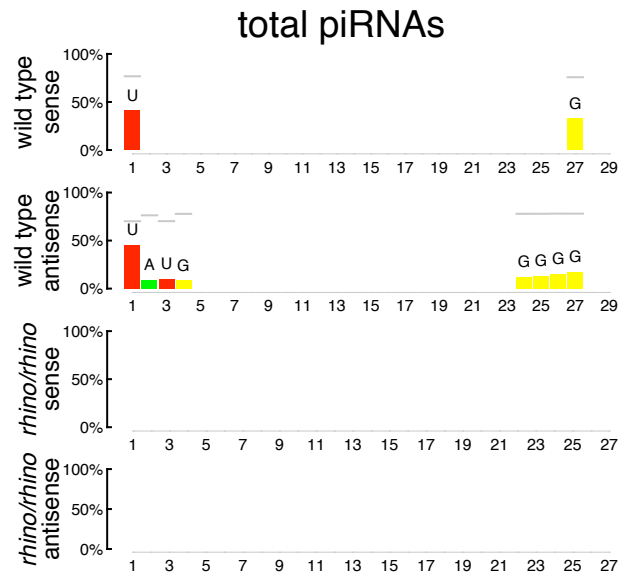

**B**

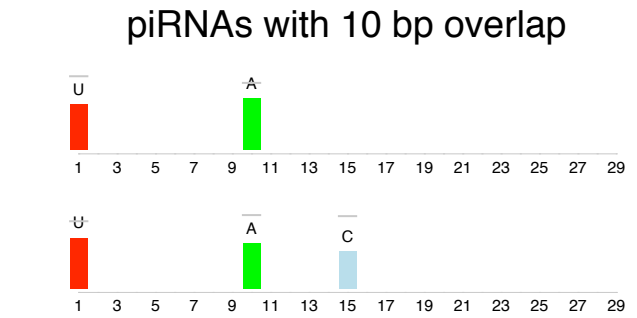

**C**

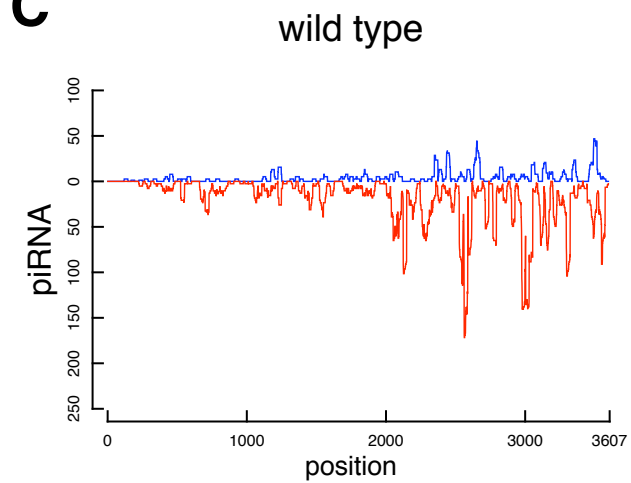

**E**

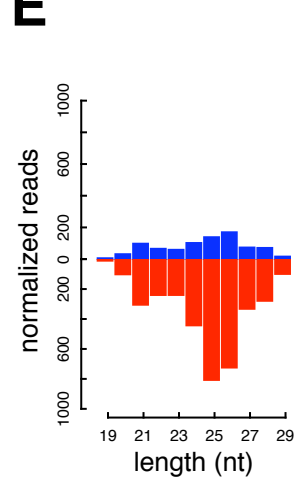

**G**

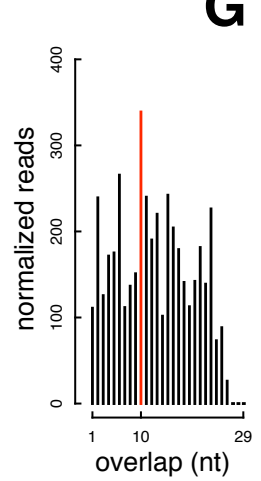

**D**

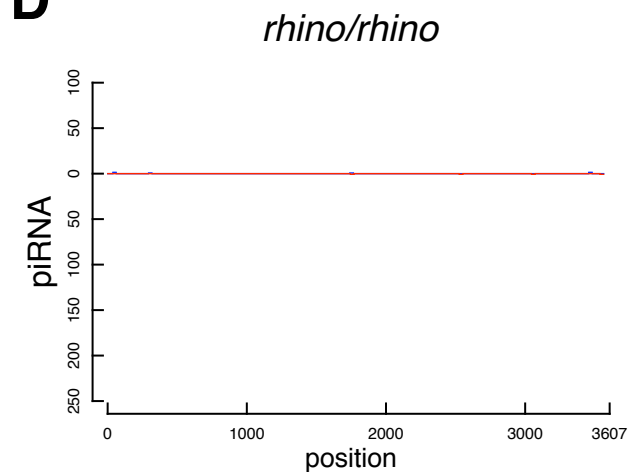

**F**

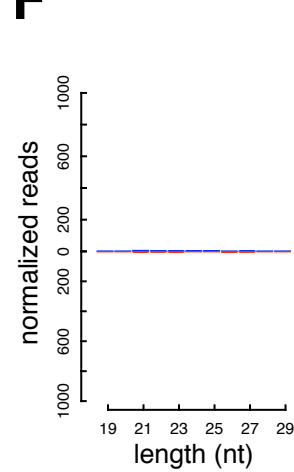

**H**

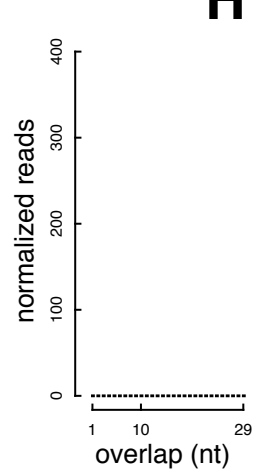

# roo

**A**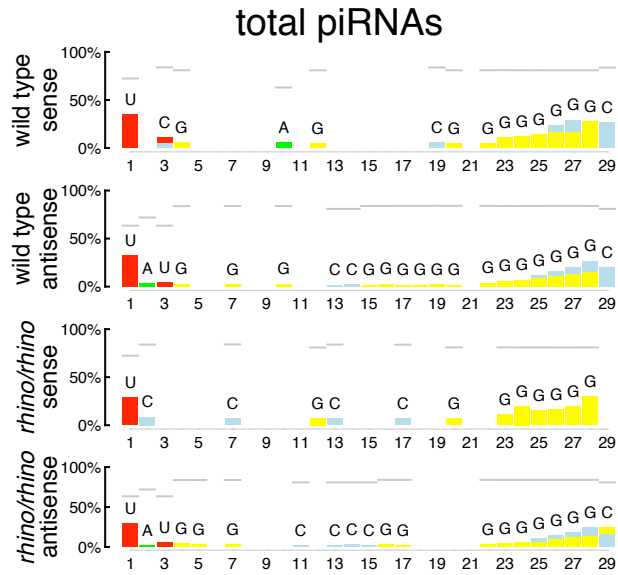**B**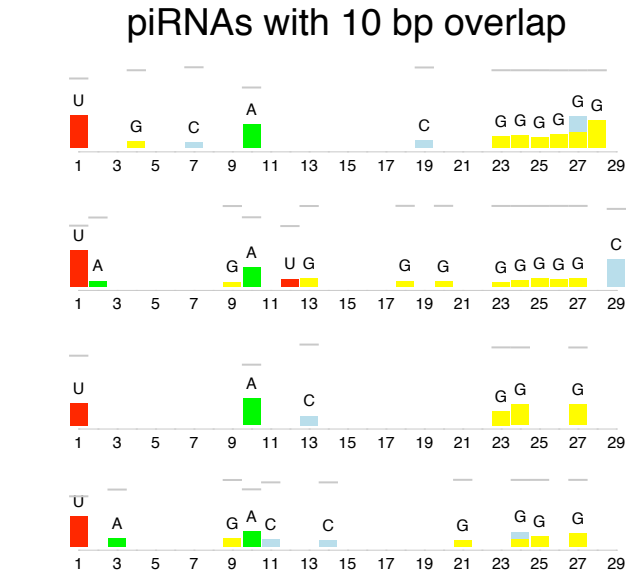**C**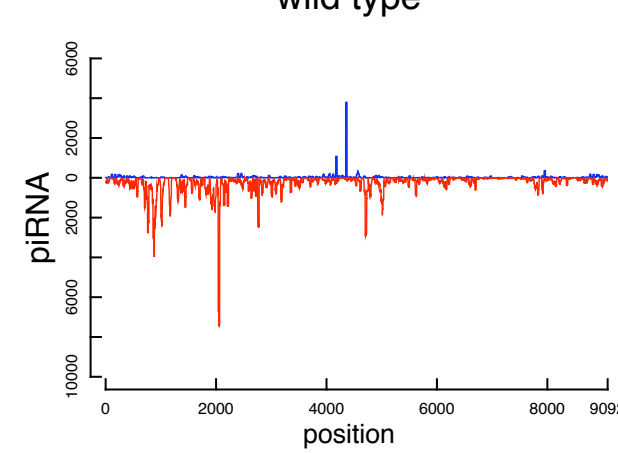**E**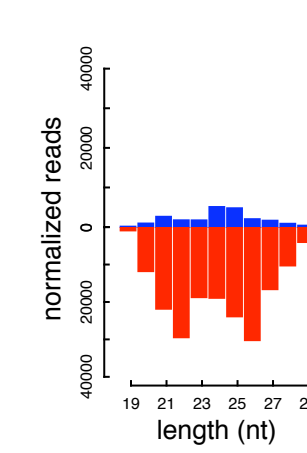**G**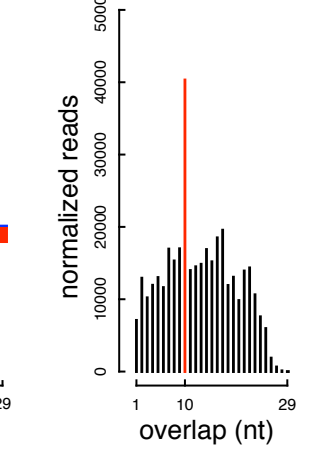**D**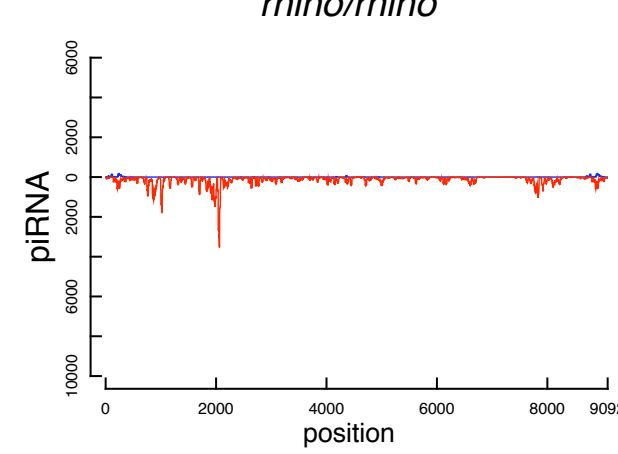**F**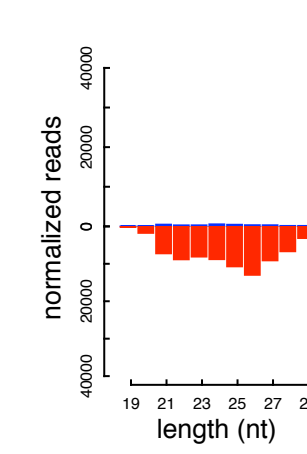**H**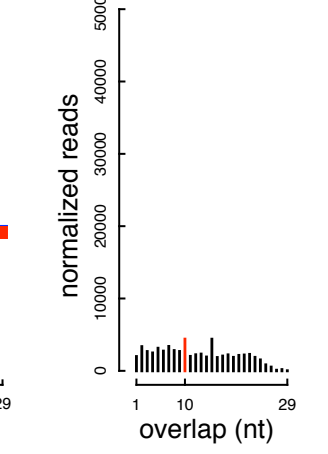

# rooA

**A**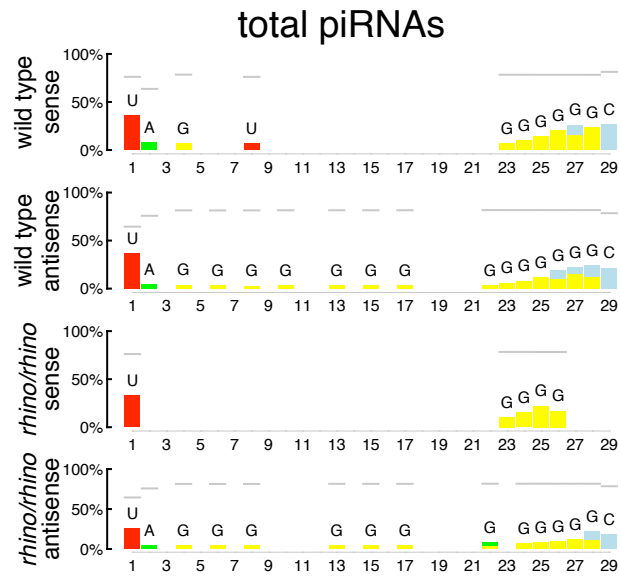**B**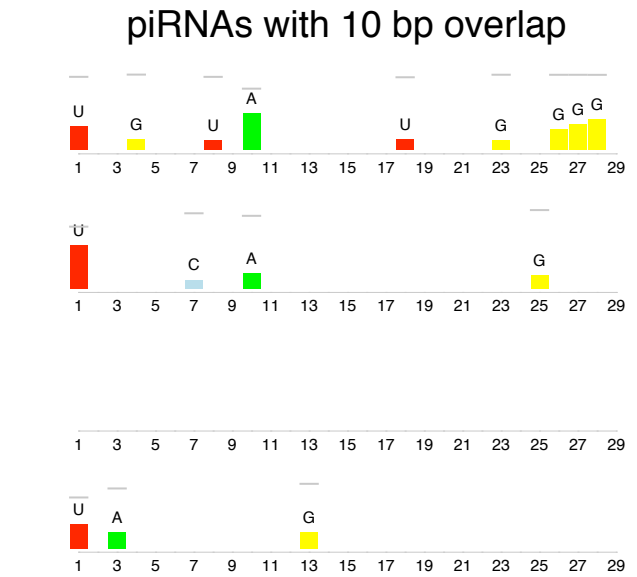**C**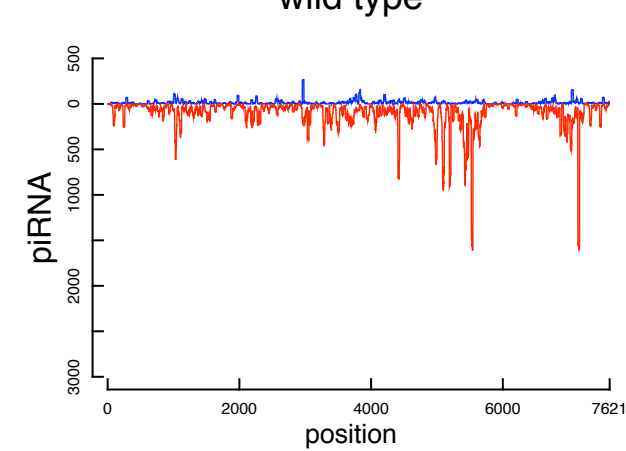**E**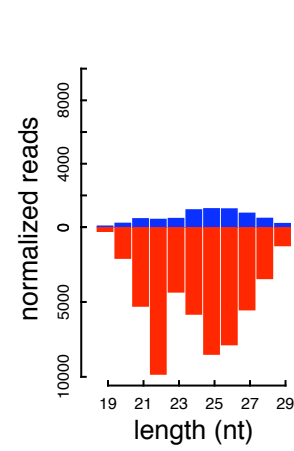**G**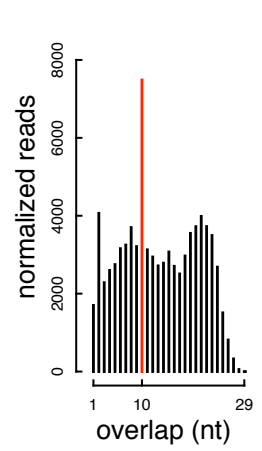**D**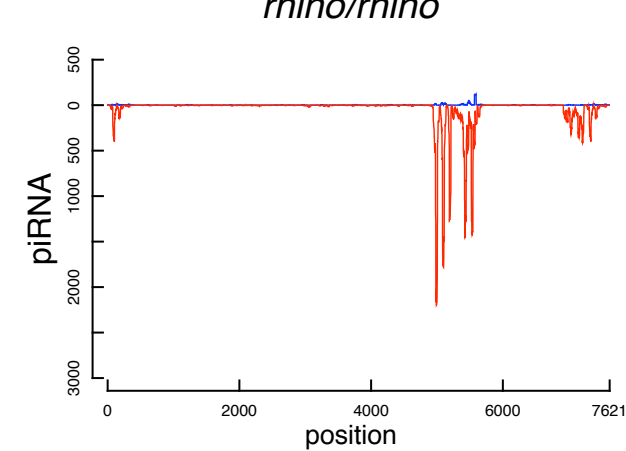**F**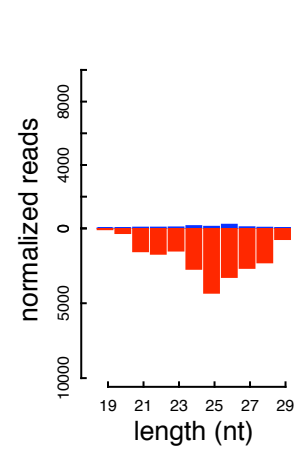**H**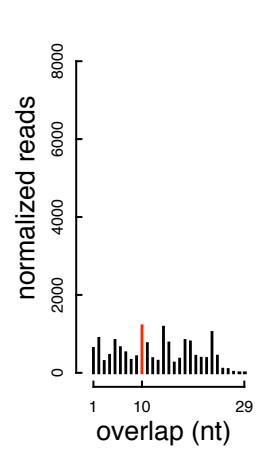

# rover

**A**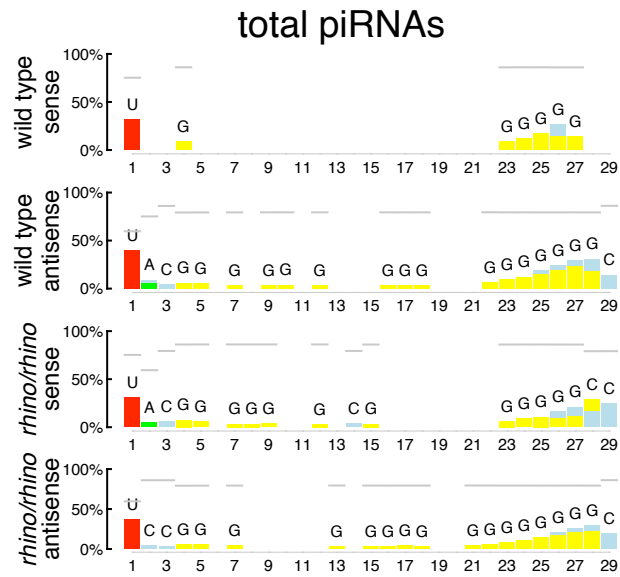**B**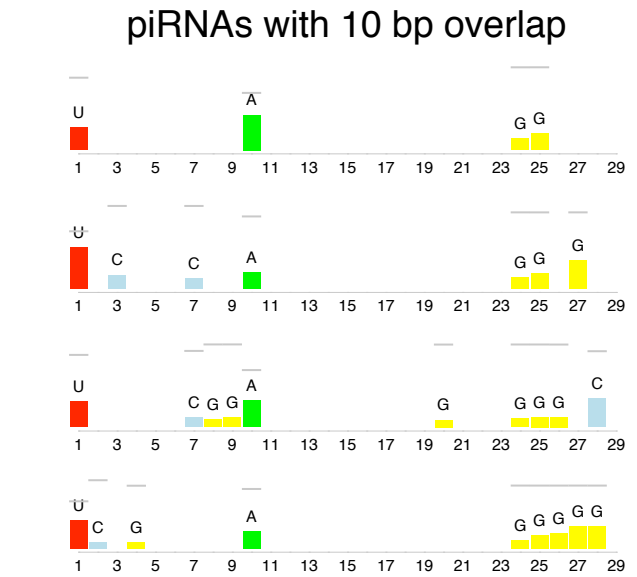**C**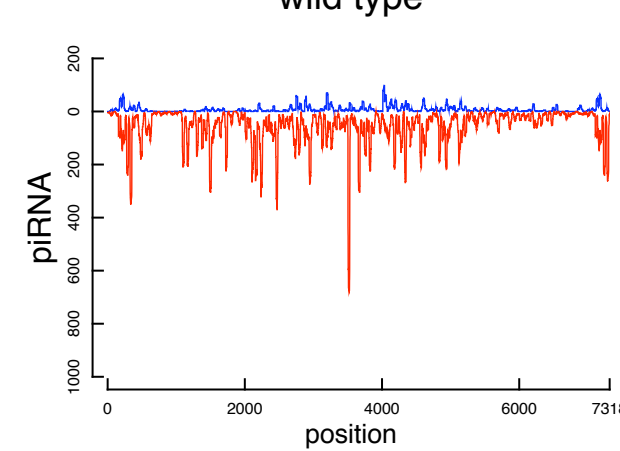**E**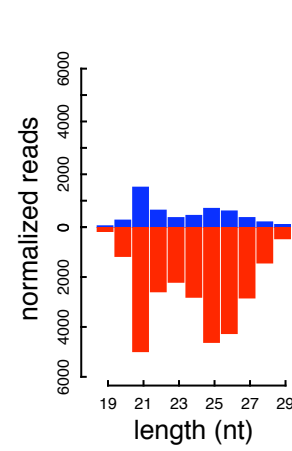**G**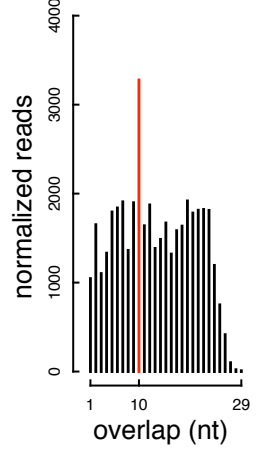**D**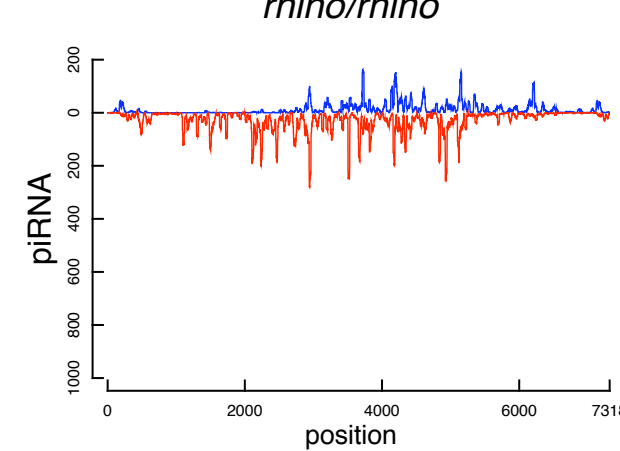**F**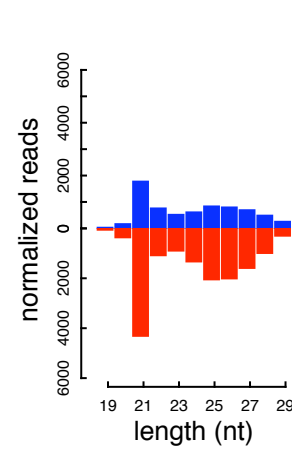**H**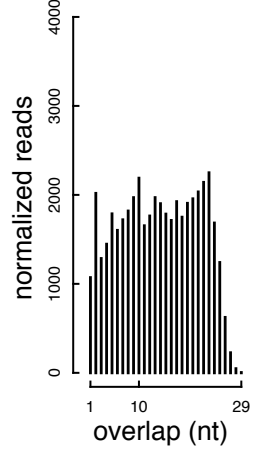



# Rt1a

**A**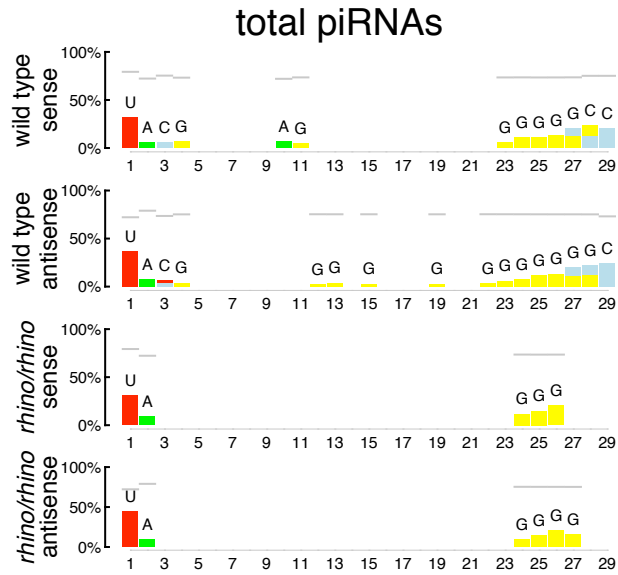**B**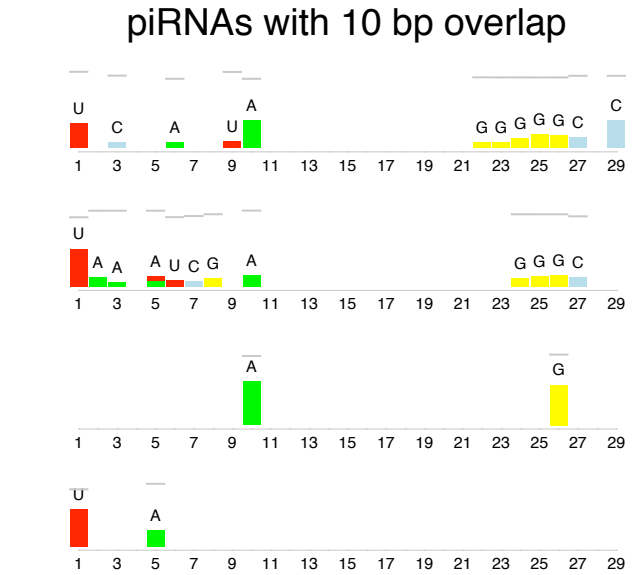**C**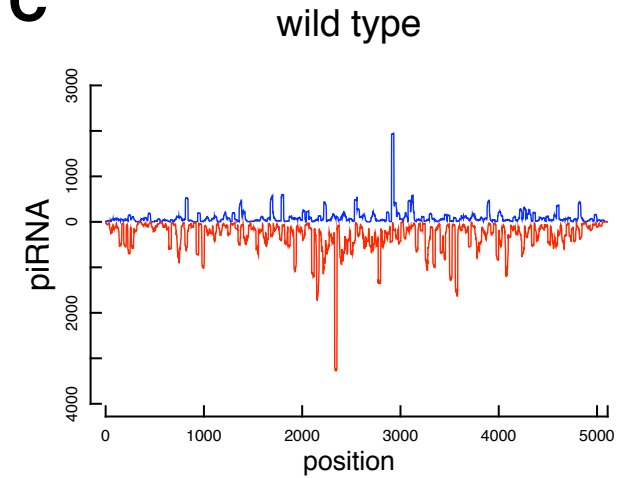**E**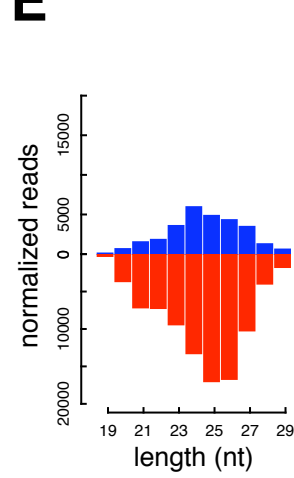**G**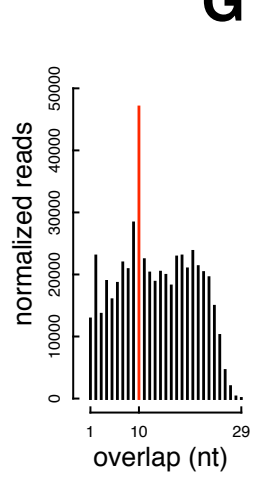**D**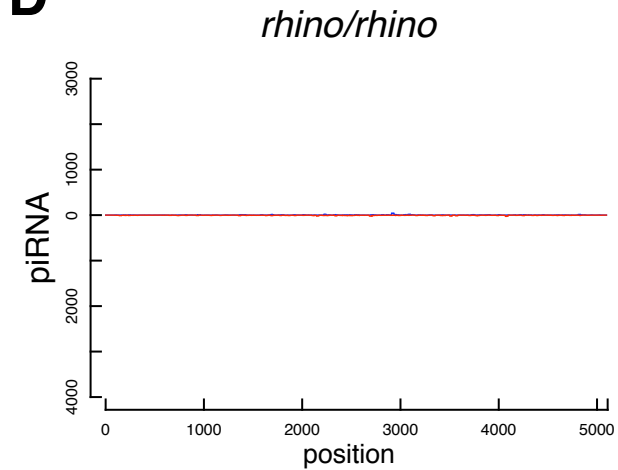**F**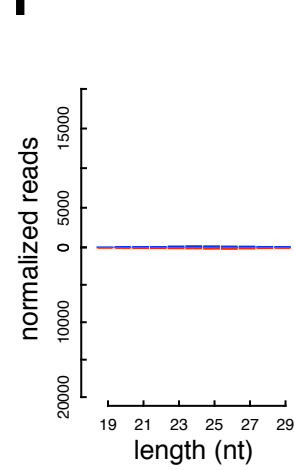**H**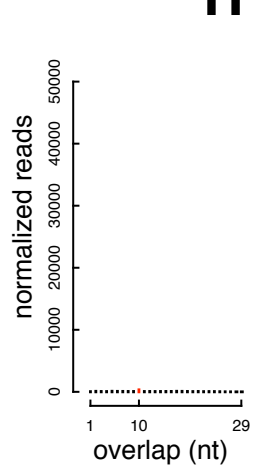

# Rt1b

**A**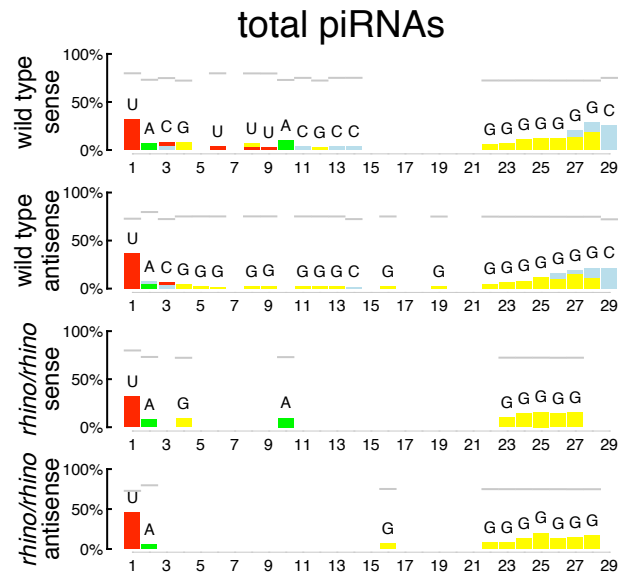**B**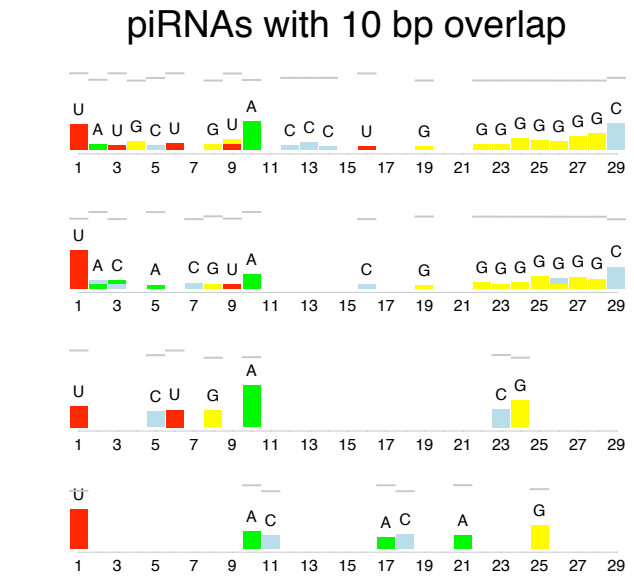**C**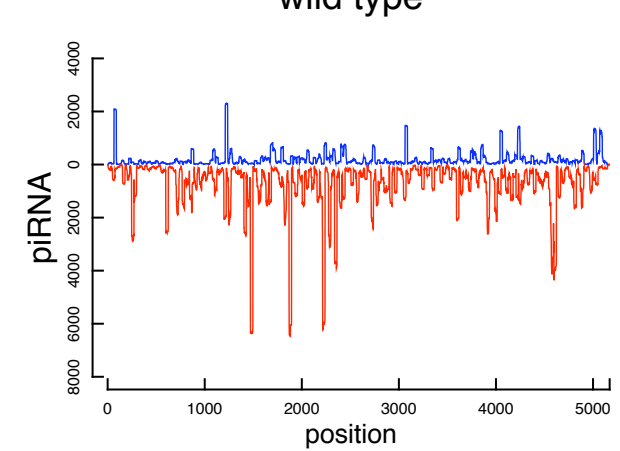**E**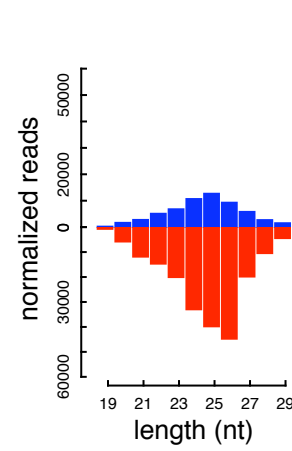**G**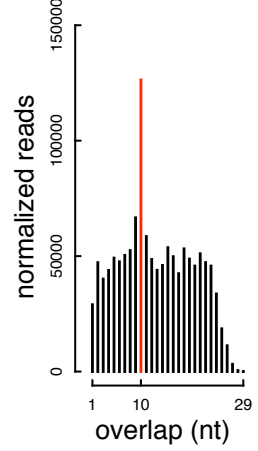**D**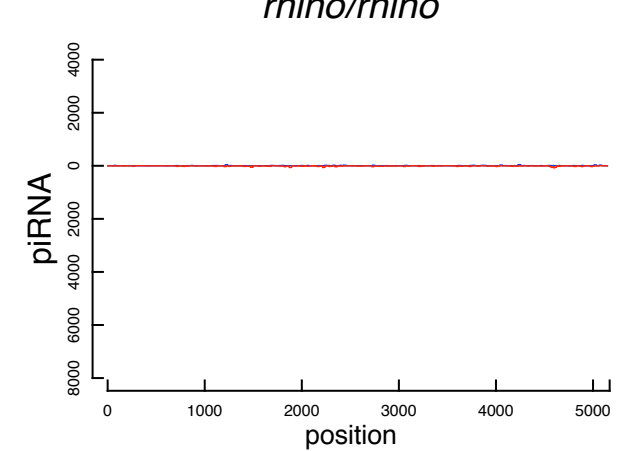**F**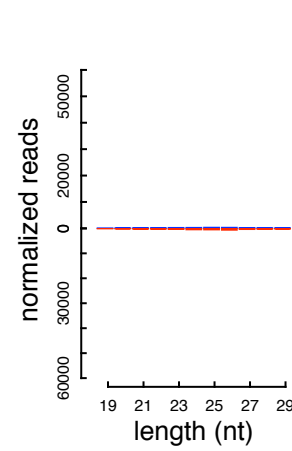**H**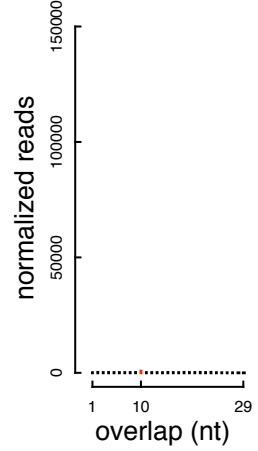

# Rt1c

**A**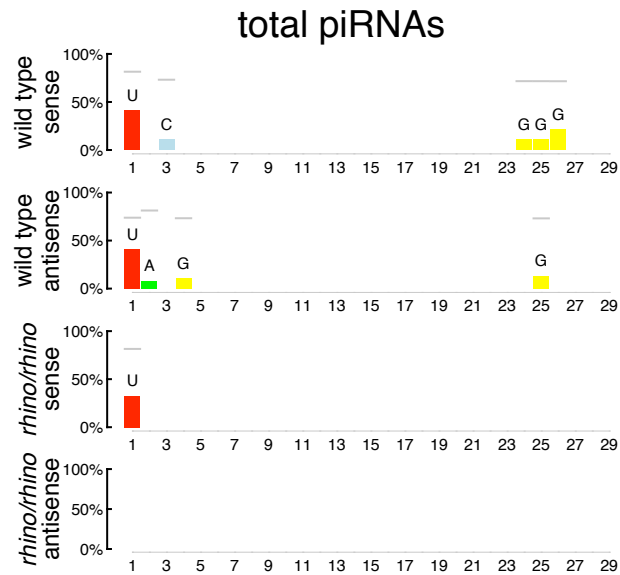**B**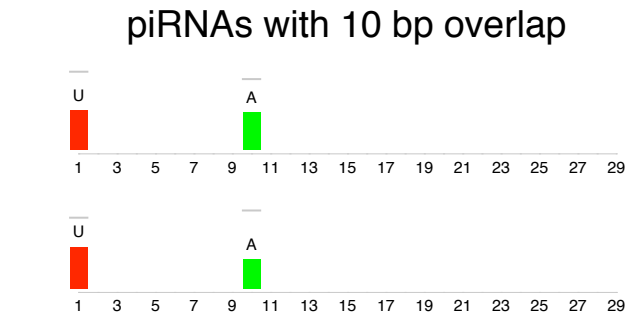**C**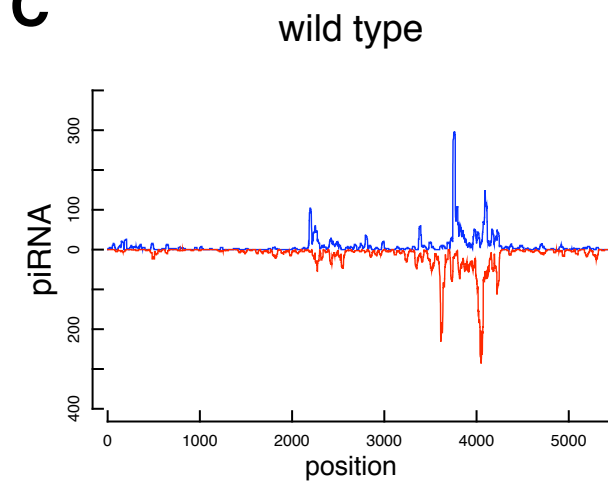**E**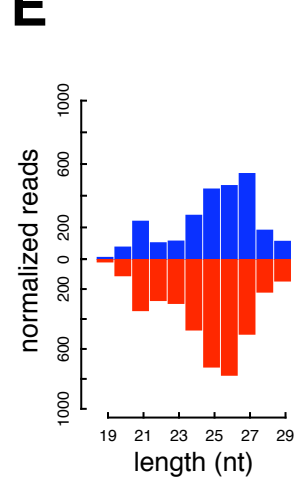**G**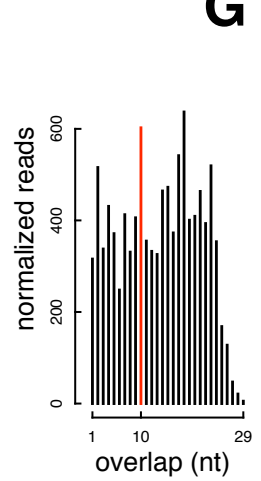**D**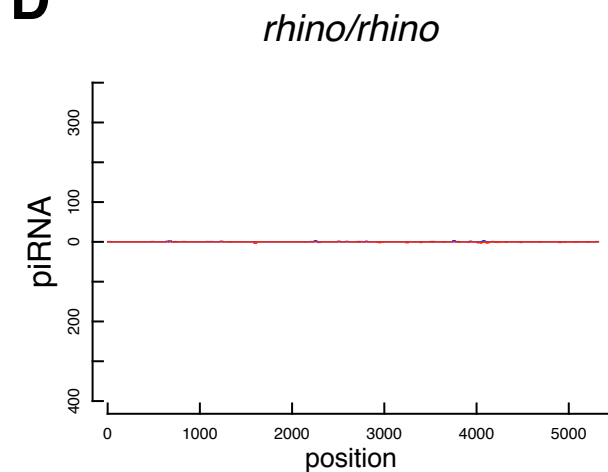**F**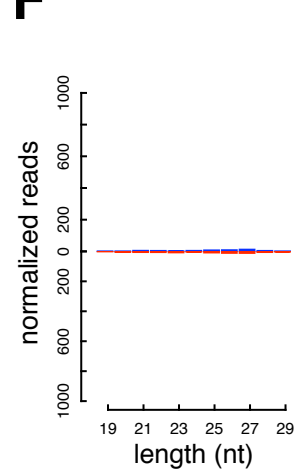**H**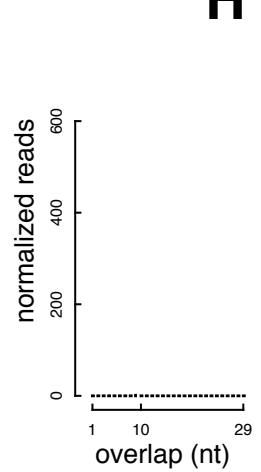

# *S* element

**A**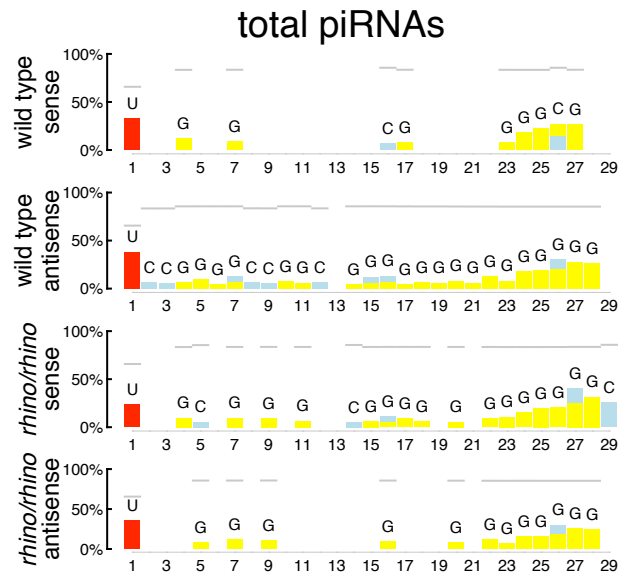**B**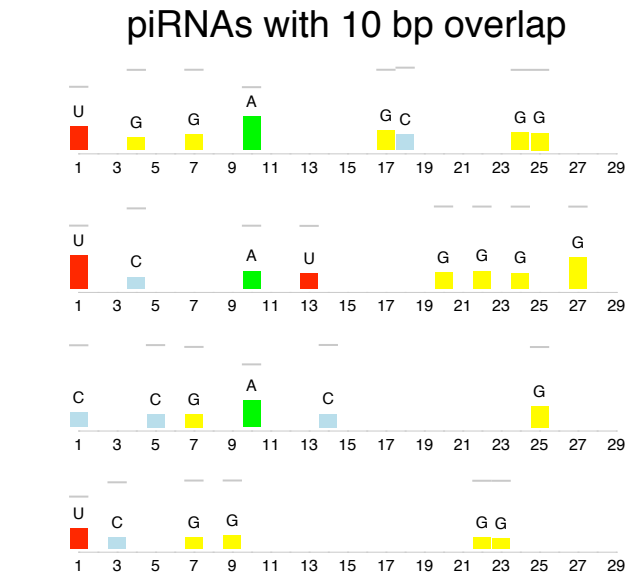**C**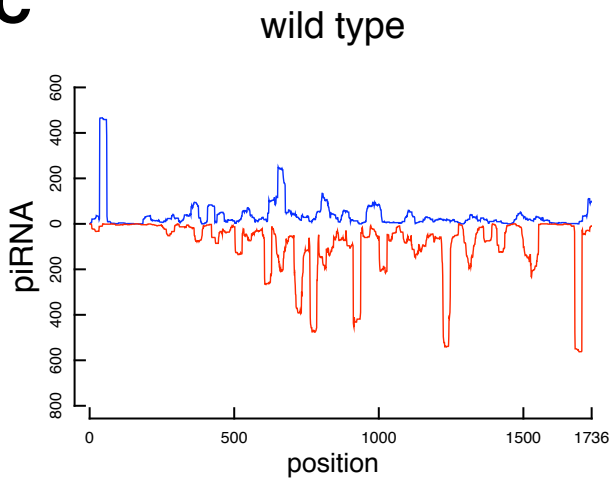**E**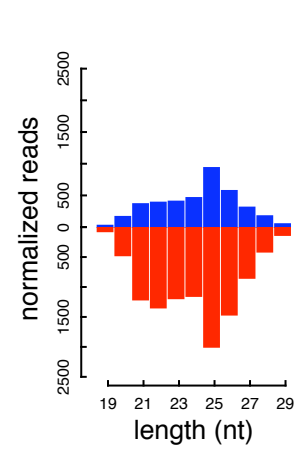**G**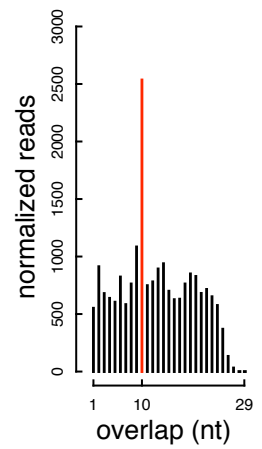**D**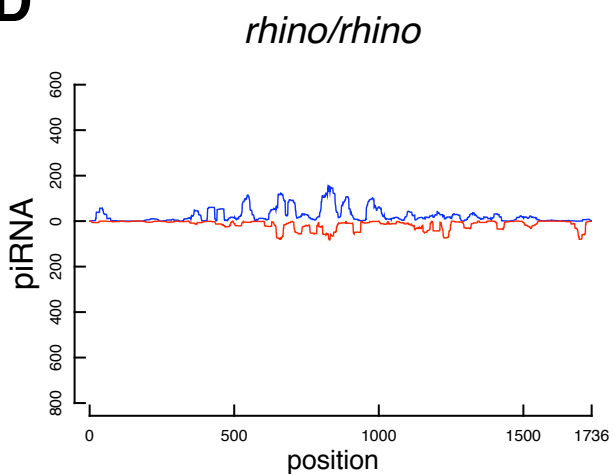**F**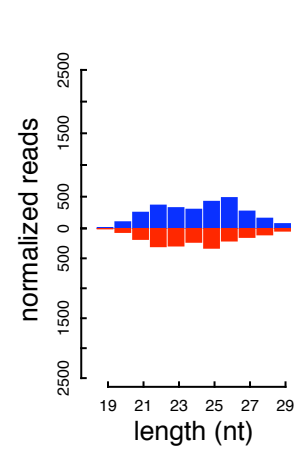**H**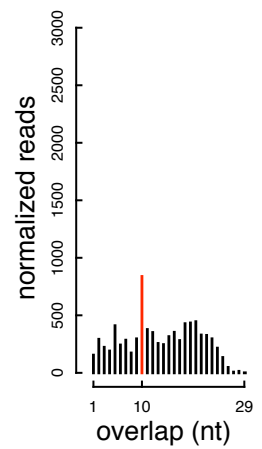



# Stalker

**A**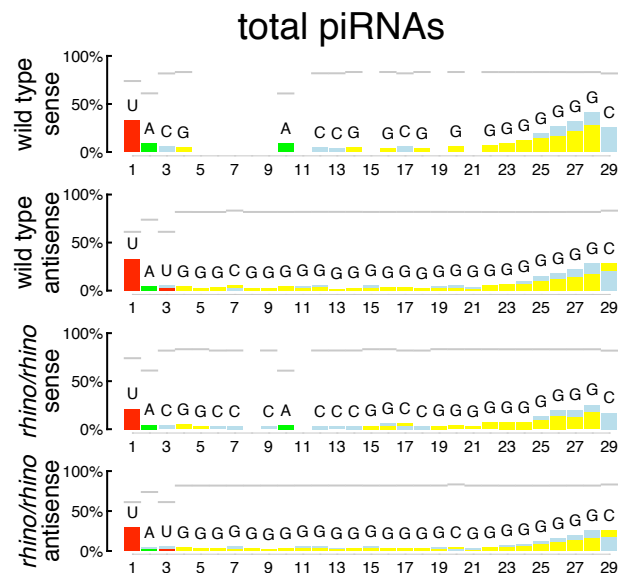**B**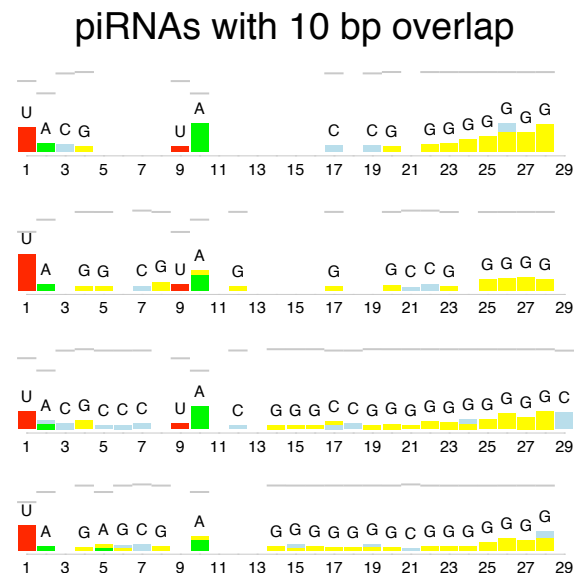**C**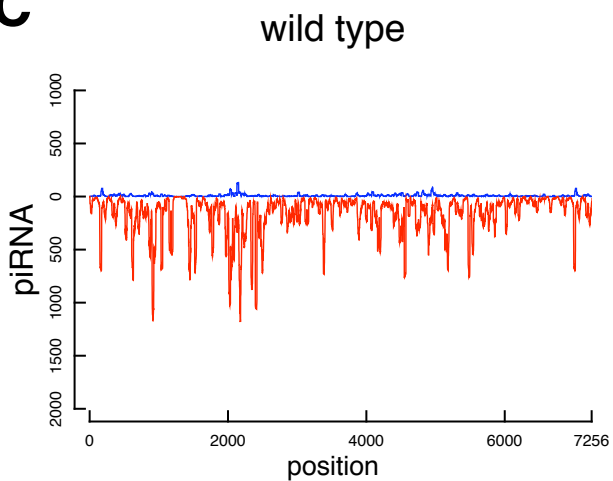**E**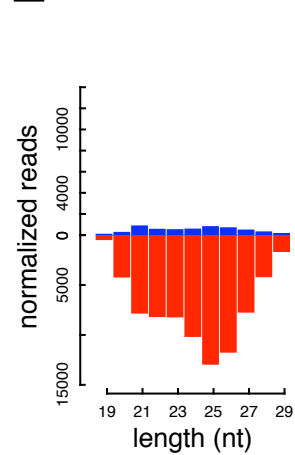**G**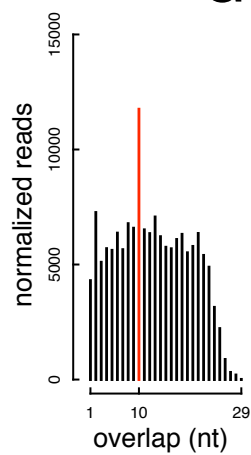**D**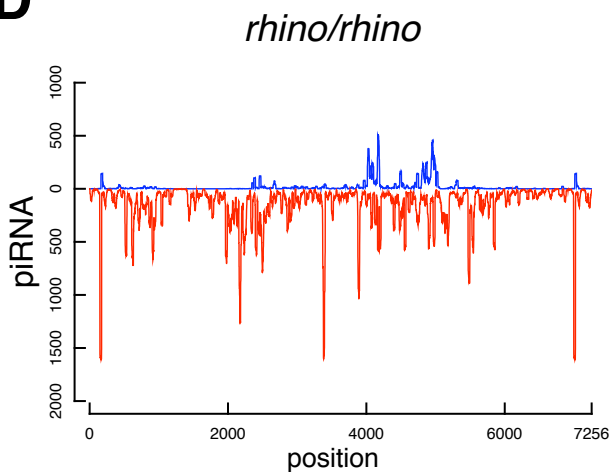**F**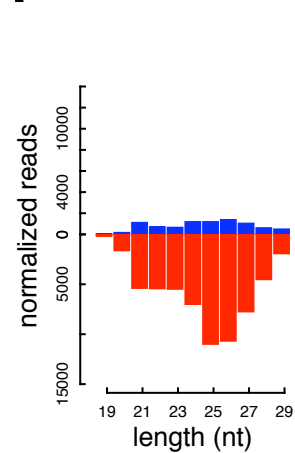**H**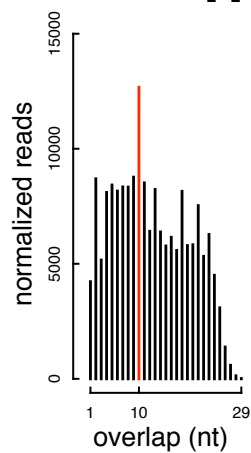



# Stalker3

**A**

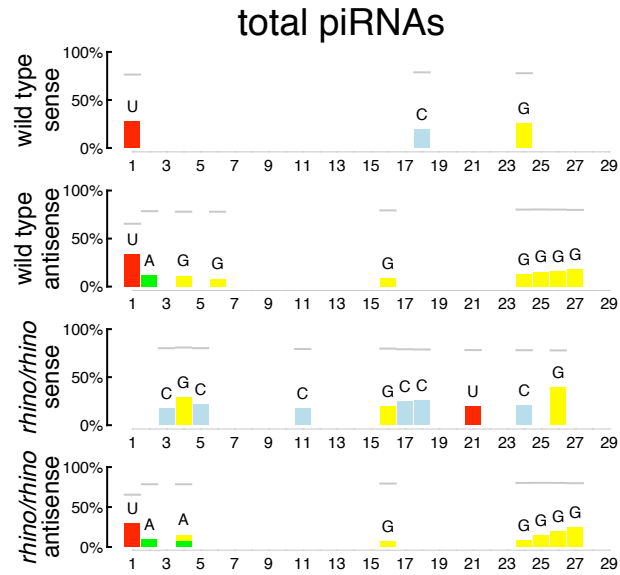

**B**

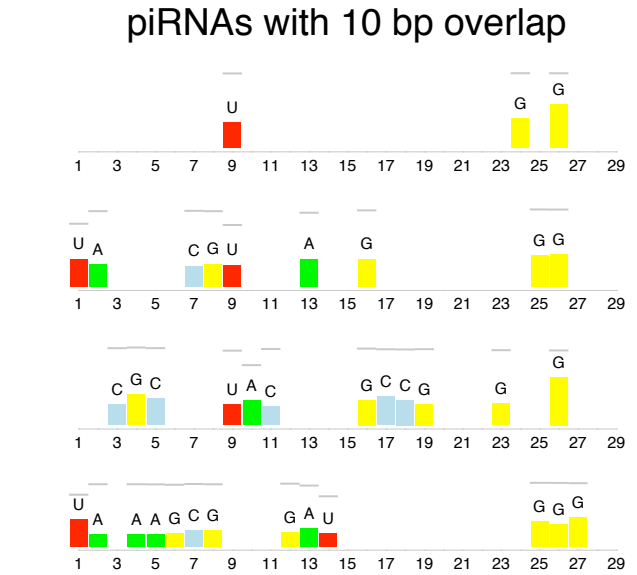

**C**

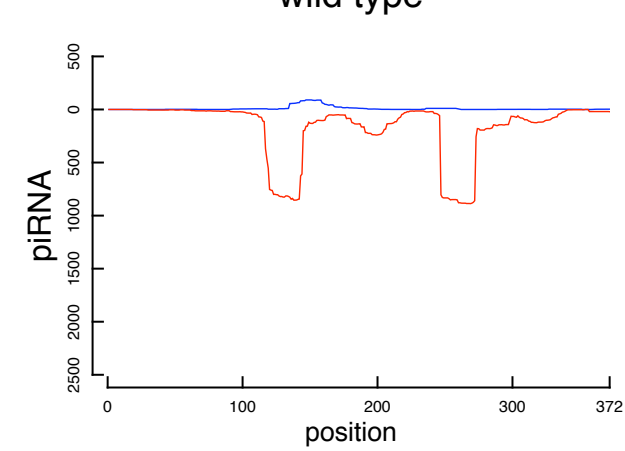

**E**

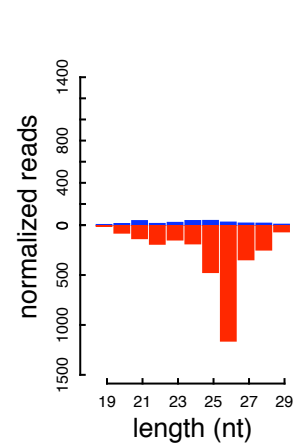

**G**

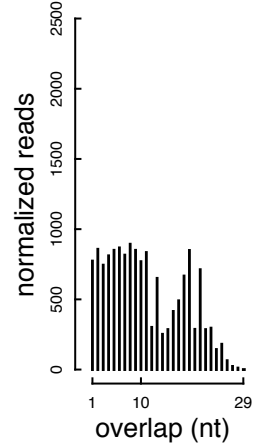

**D**

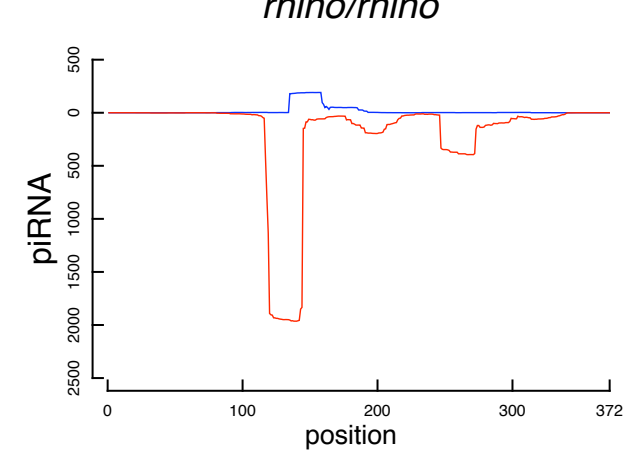

**F**

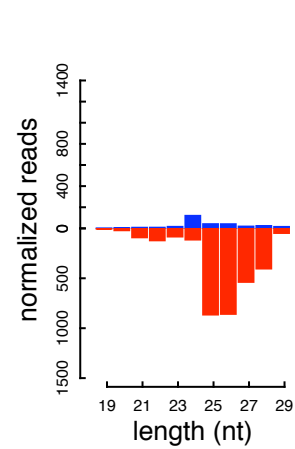

**H**

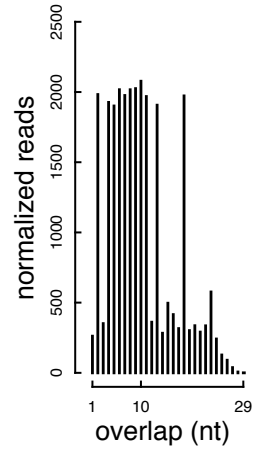



# Stalker4

**A**

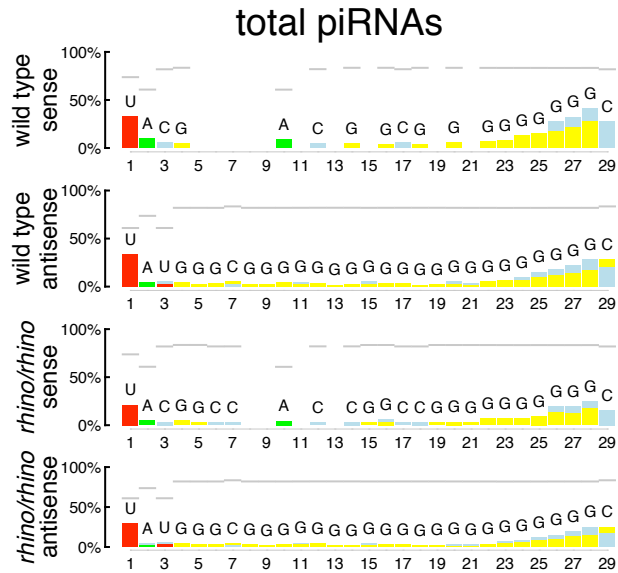

**B**

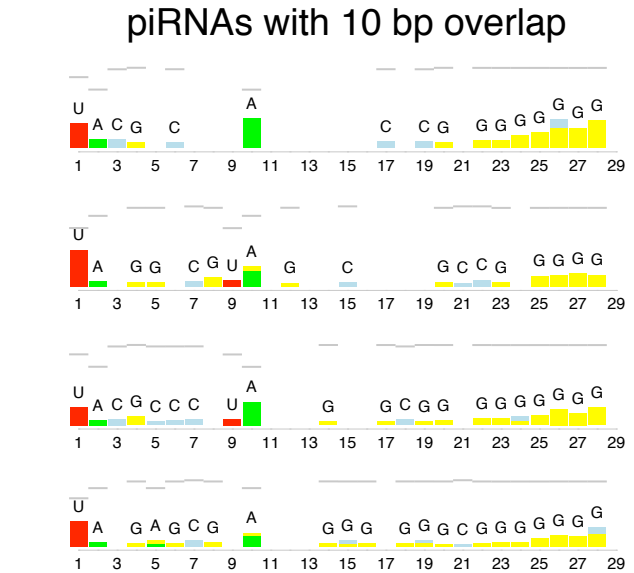

**C**

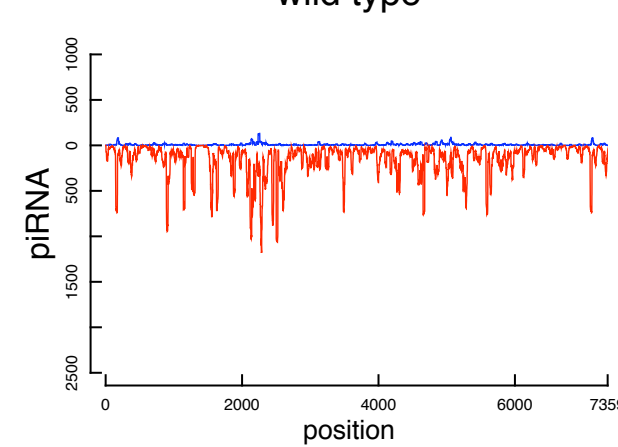

**D**

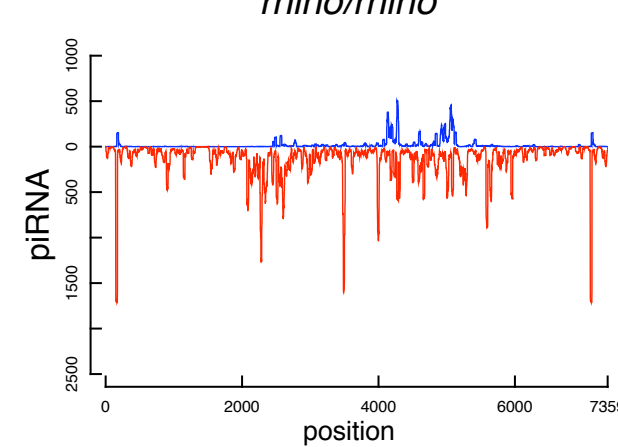

**E**

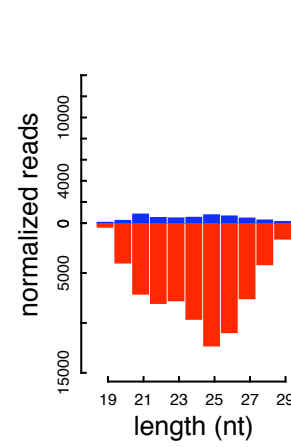

**F**

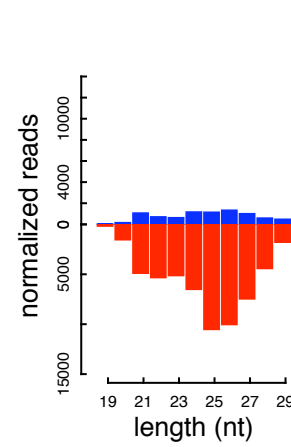

**G**

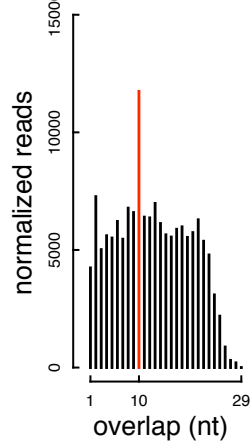

**H**

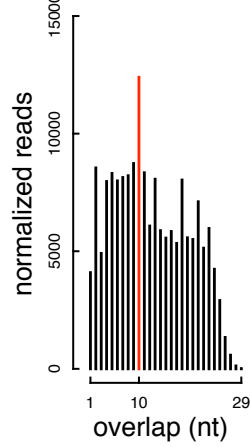

# Tabor

**A**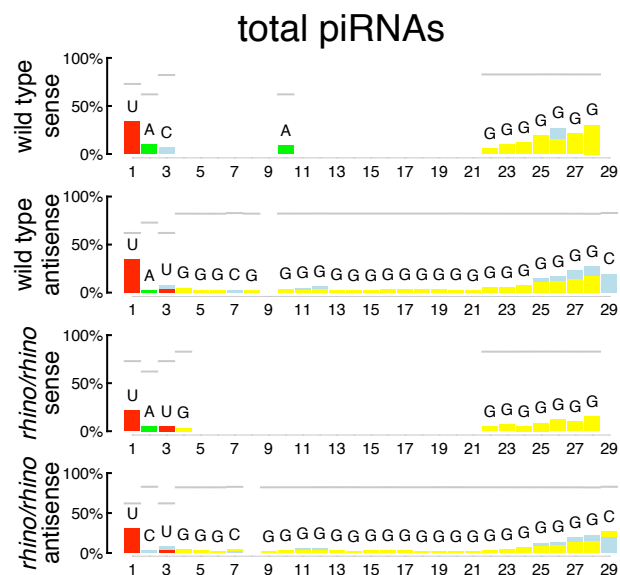**B**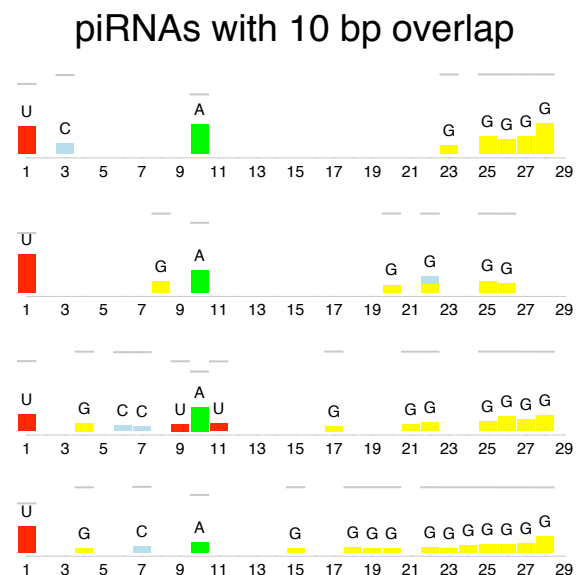**C**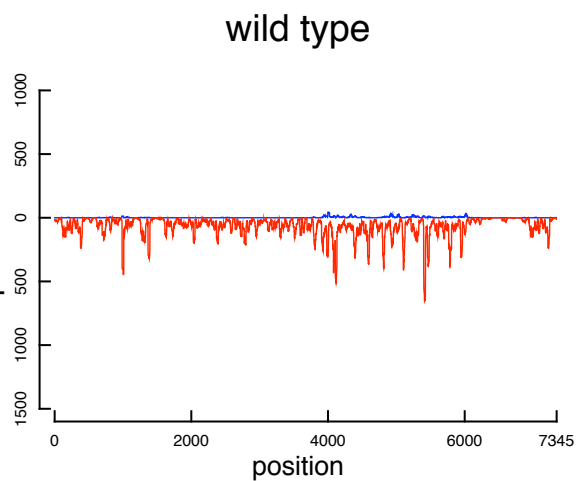**E**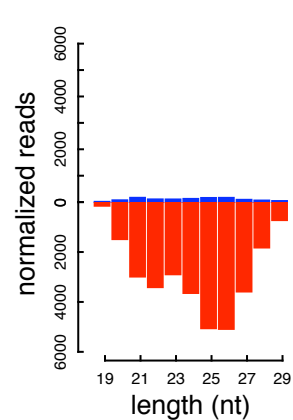**G**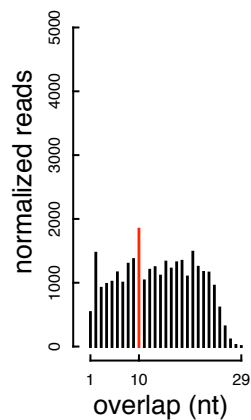**D**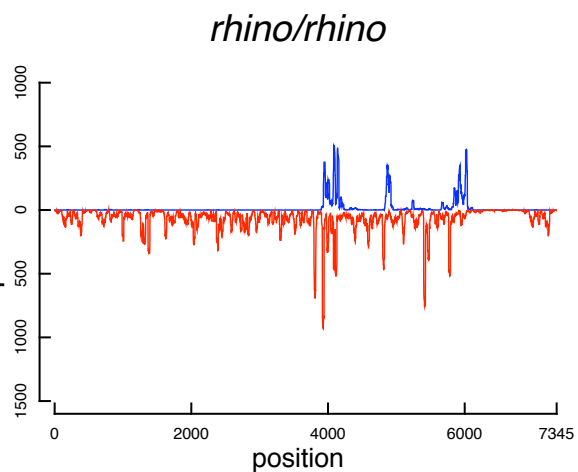**F**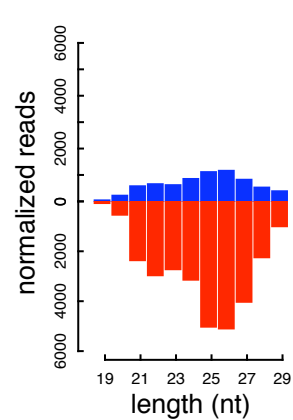**H**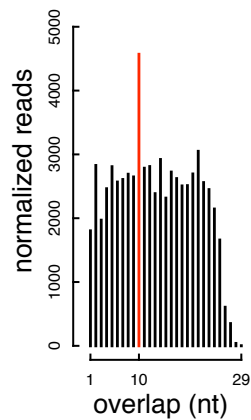

# TAHRE

**A**

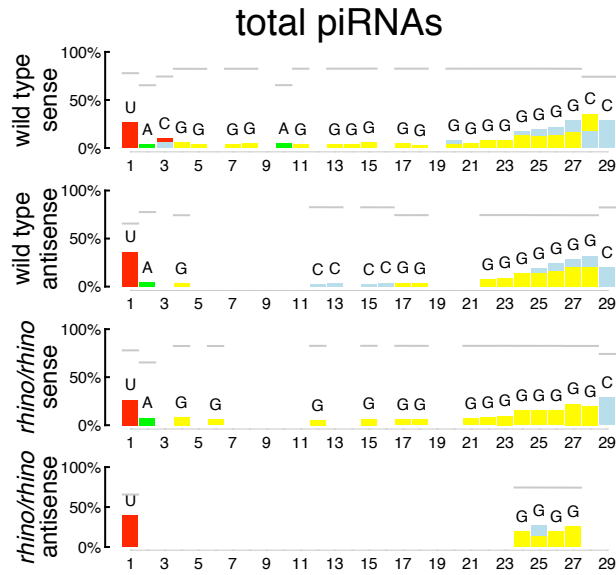

**B**

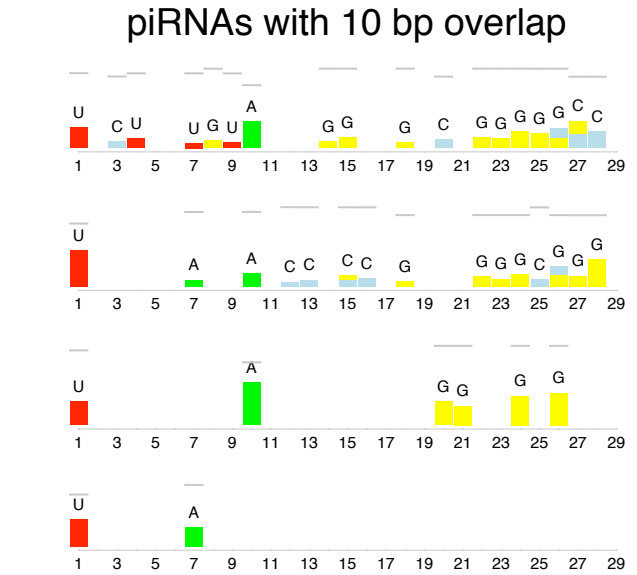

**C**

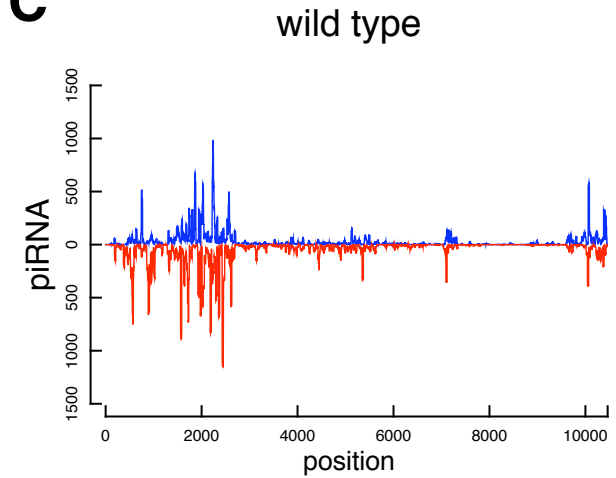

**E**

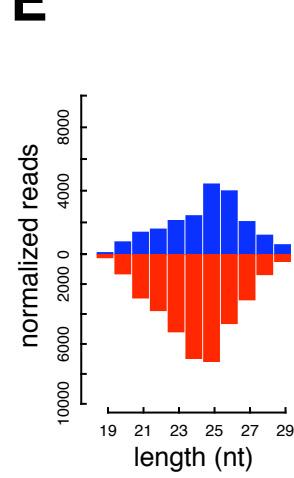

**G**

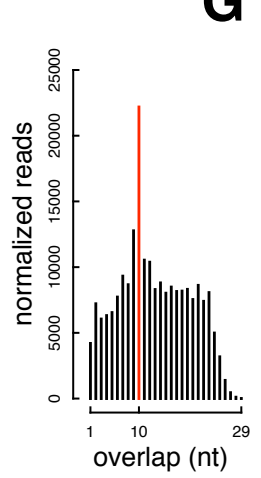

**D**

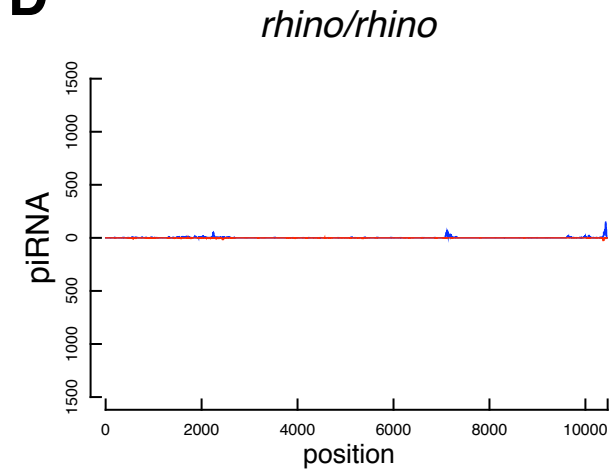

**F**

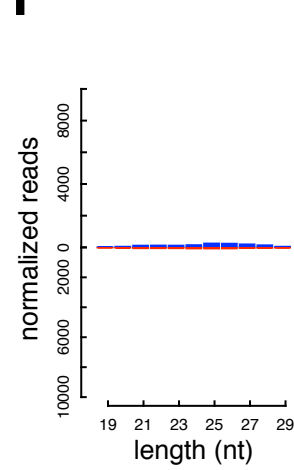

**H**

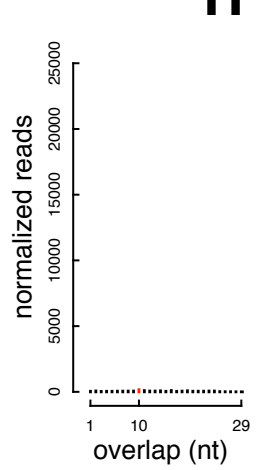

# TART C TART B TART A

**A**

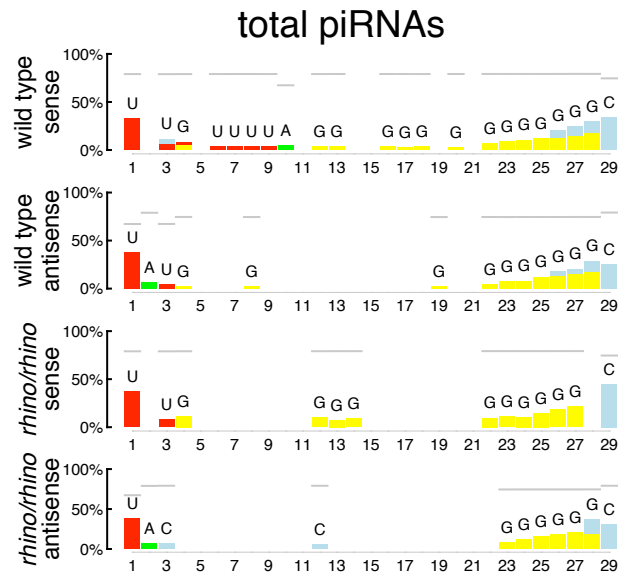

**B**

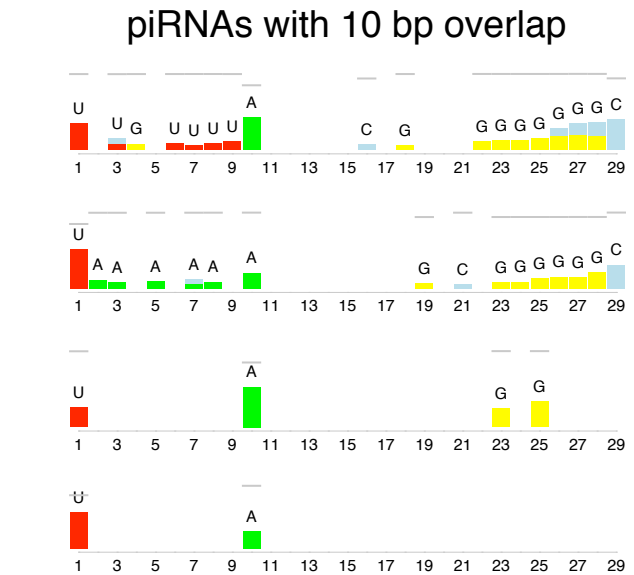

**C**

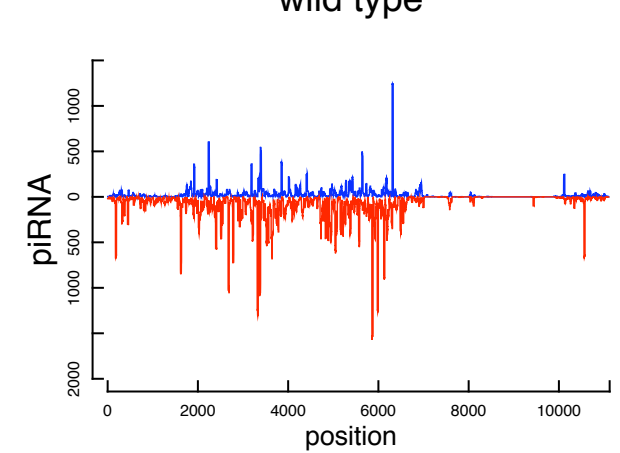

**E**

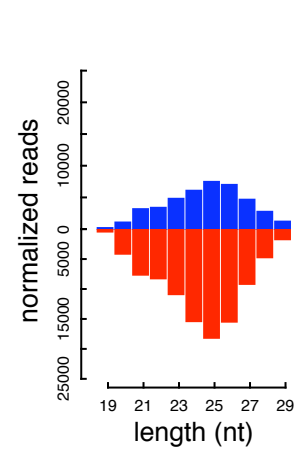

**G**

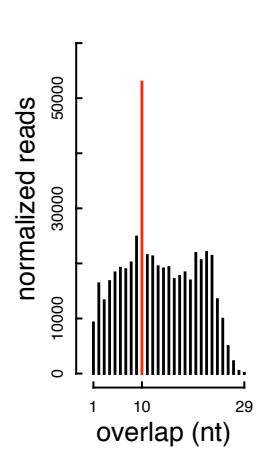

**D**

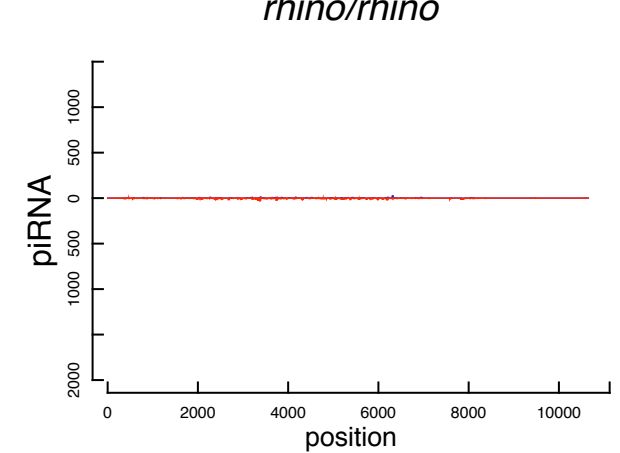

**F**

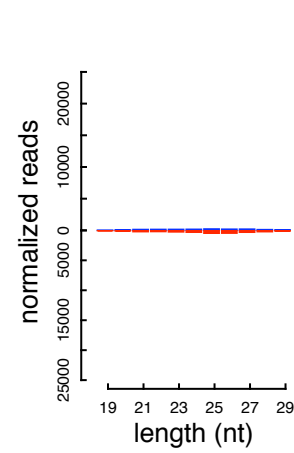

**H**

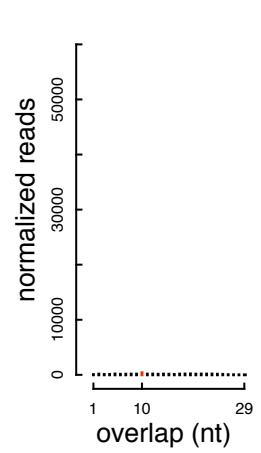

# *transib2*

**A**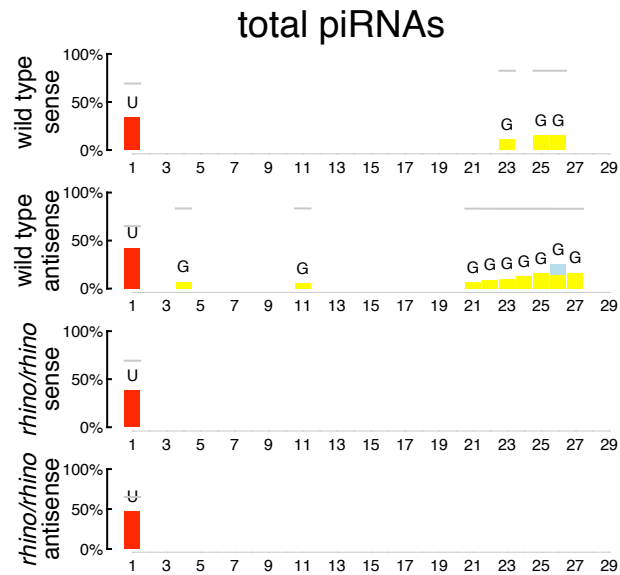**B**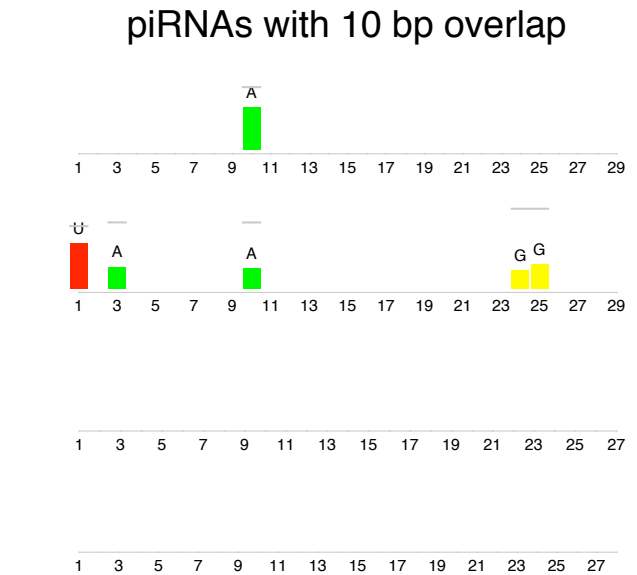**C**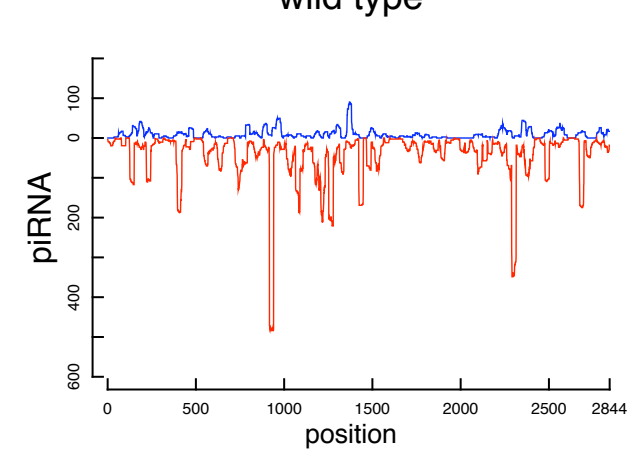**E**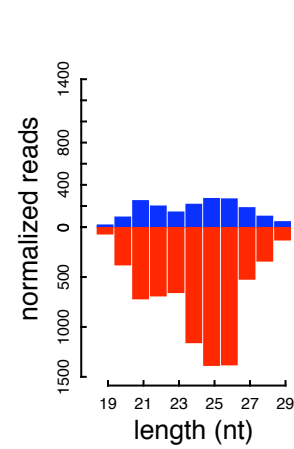**G**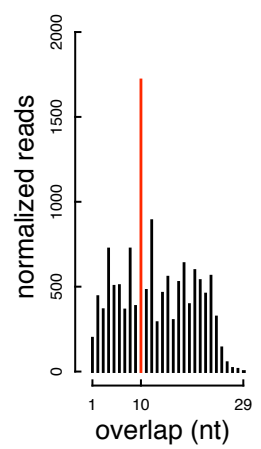**D**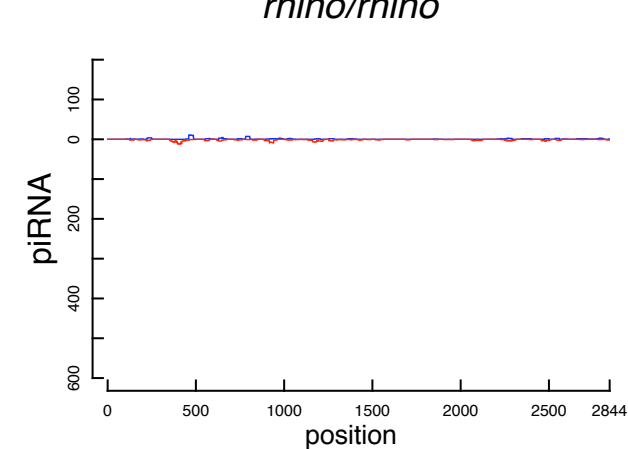**F**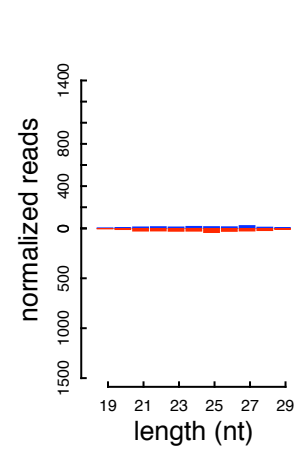**H**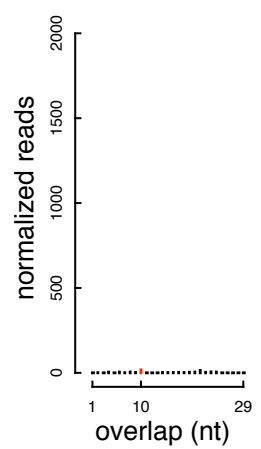

# Transpac

**A**

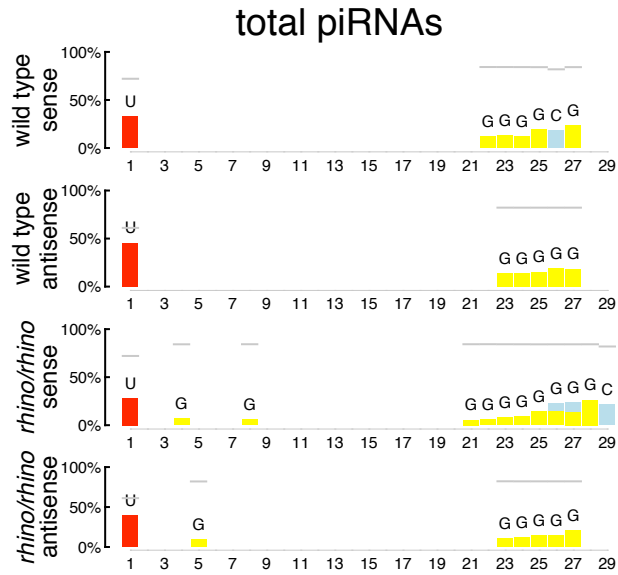

**B**

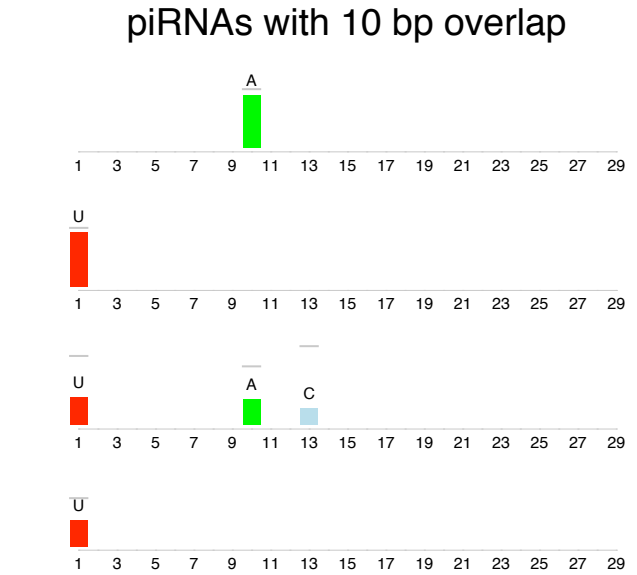

**C**

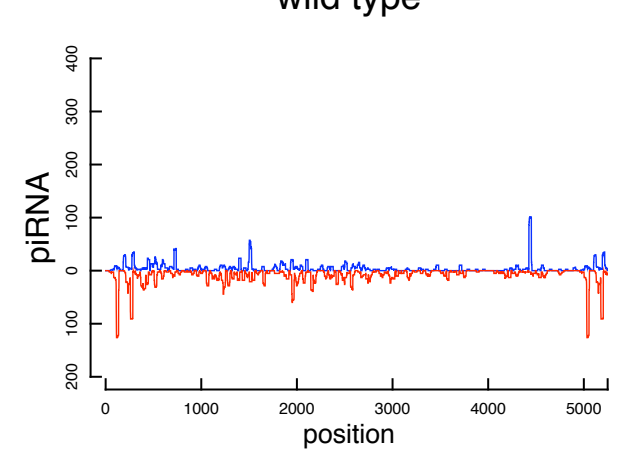

**E**

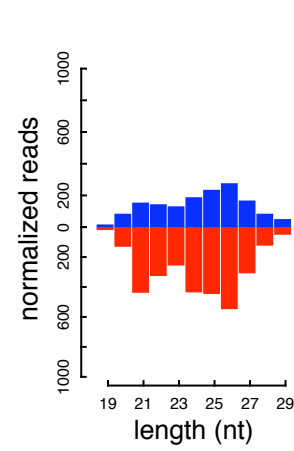

**G**

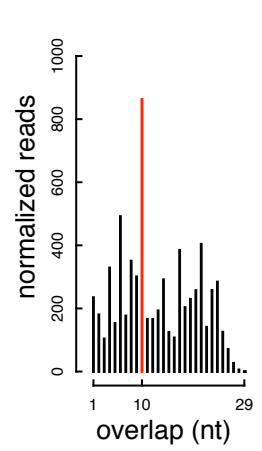

**D**

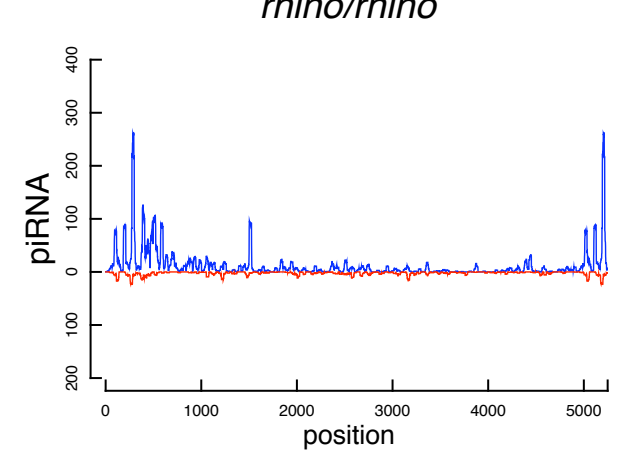

**F**

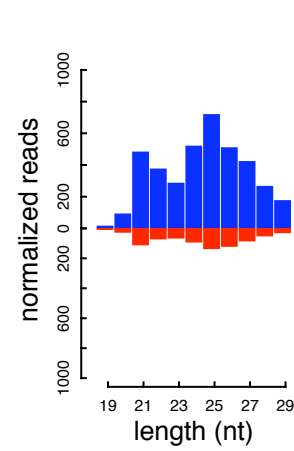

**H**

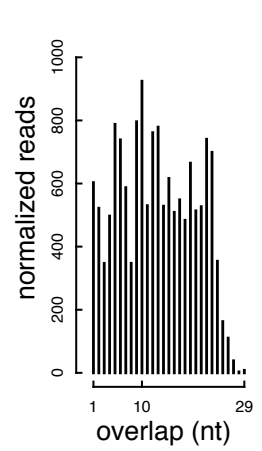

# X element

**A**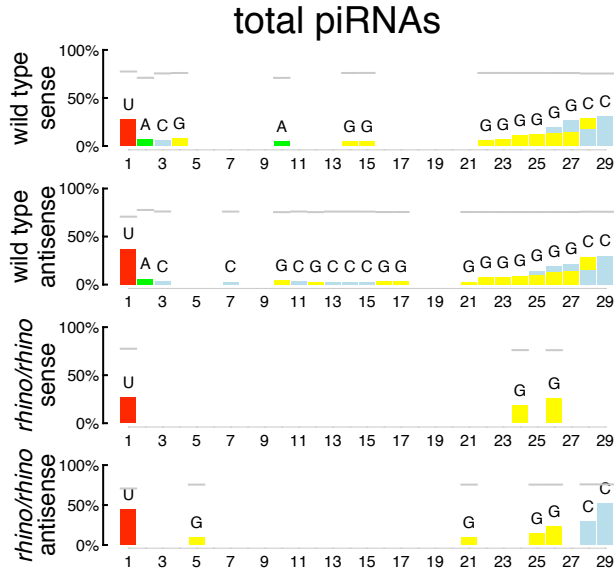**B**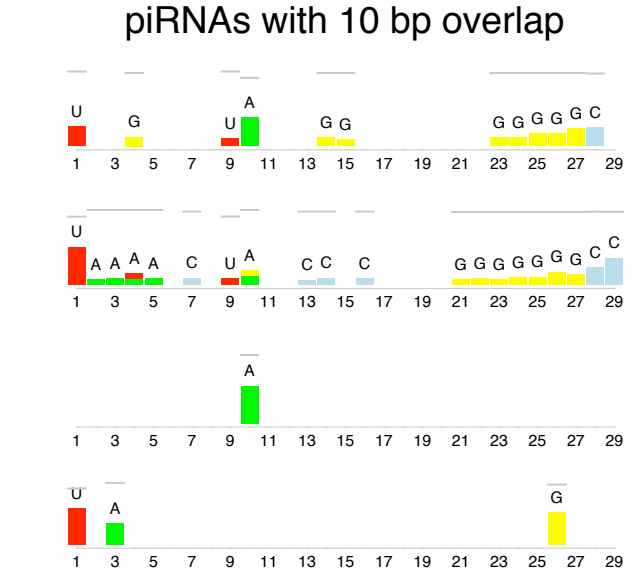**C**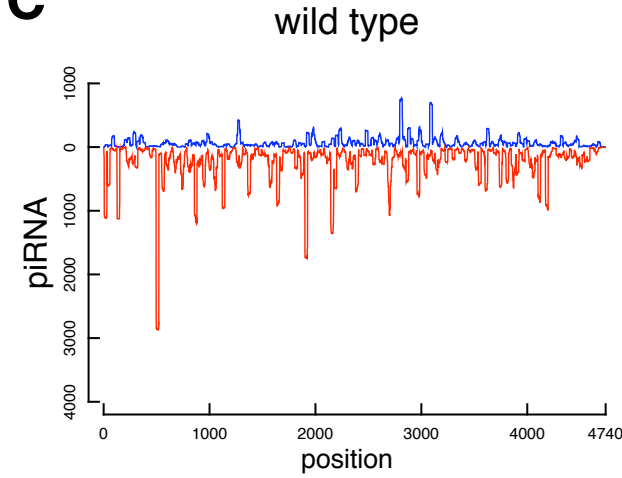**E**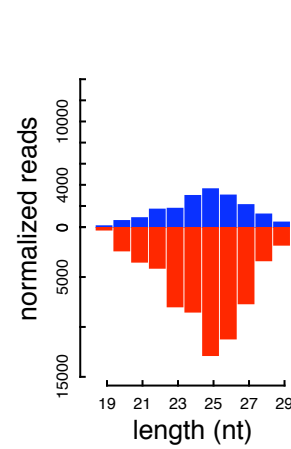**G**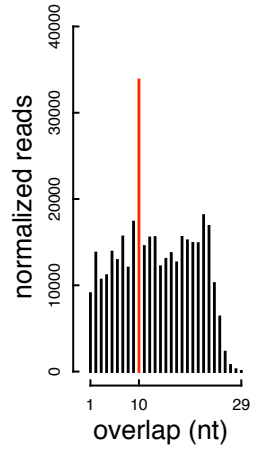**D**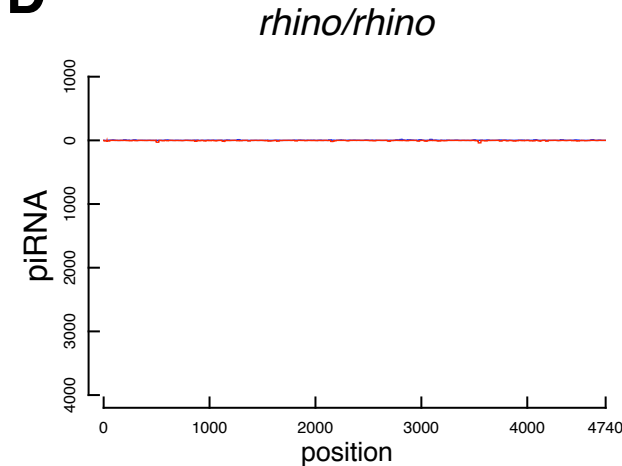**F**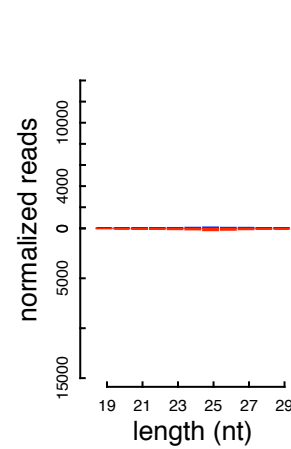**H**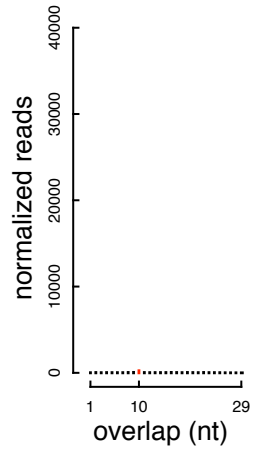

# ZAM

**A**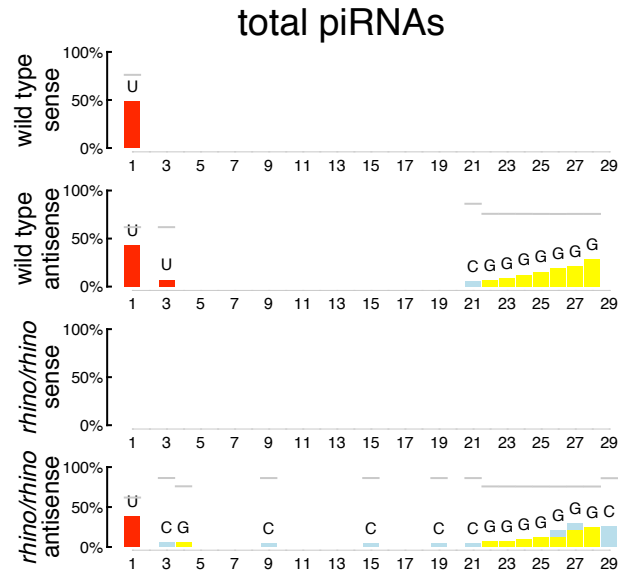**B**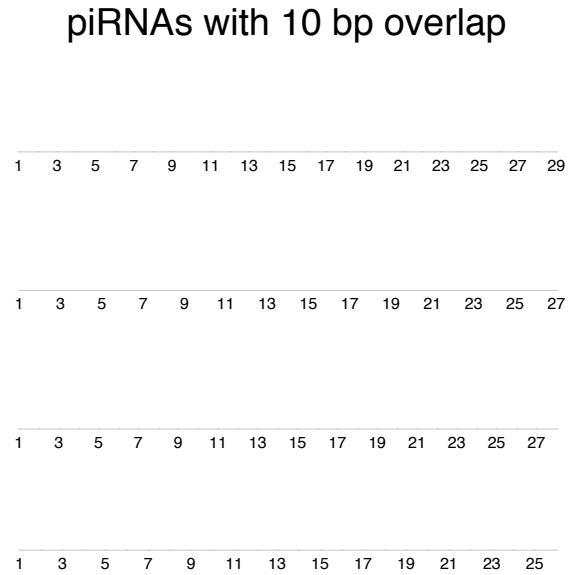**C**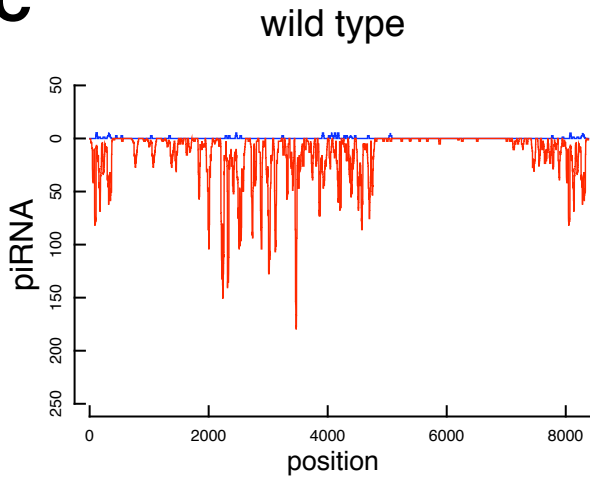**E**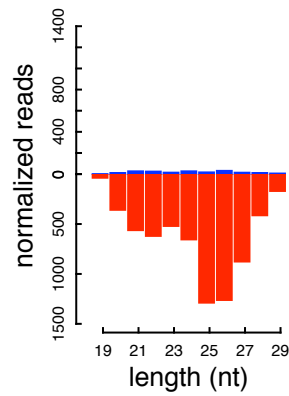**G**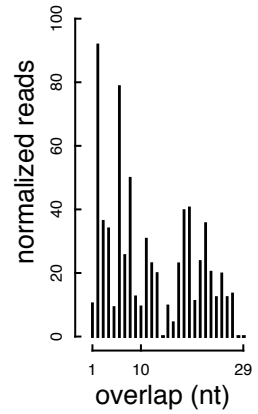**D**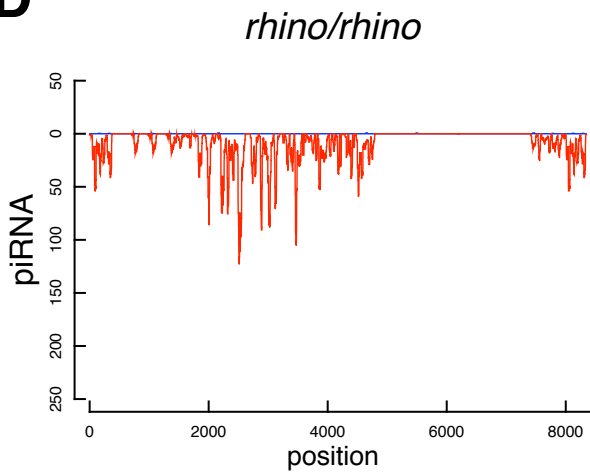**F**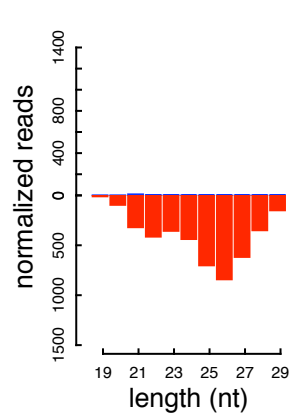**H**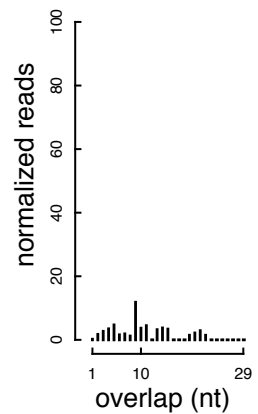

Supplement: NIHMS148258-supplement-02.pdf [file NIHMS148258-supplement-02.pdf]
